# Supplementary material for: Promitotic Action of Oenothera biennis on Senescent Human Dermal Fibroblasts
Source: MDPI journal article supplement (doi:10.3390/ijms232315153), 2022-12-02
Supplement: s1 [file s1]

**Table S5.** Statistically significant upregulated proteins in senescent NHDF cells after ObHex treatment vs untreated senescent NHDF.

| <b>Genes</b>   | <b>First Protein Description</b>                             | <b>Diff. (SEN ObHex -SEN Untreated)</b> | <b>adj.p-value</b> |
|----------------|--------------------------------------------------------------|-----------------------------------------|--------------------|
| ZNRF1          | E3 ubiquitin-protein ligase ZNRF1                            | 1.230648                                | 0.000816           |
| IQGAP3         | Ras GTPase-activating-like protein IQGAP3                    | 0.74476                                 | 1.16E-07           |
| MCM5           | DNA replication licensing factor MCM5                        | 0.68518                                 | 2.31E-08           |
| MCM2           | DNA replication licensing factor MCM2                        | 0.68264                                 | 6.27E-08           |
| CDK1           | Cyclin-dependent kinase 1                                    | 0.66352                                 | 3.65E-05           |
| DHFR           | Dihydrofolate reductase                                      | 0.64416                                 | 0.000118           |
| MCM7           | DNA replication licensing factor MCM7                        | 0.63934                                 | 1.74E-07           |
| MCM4           | DNA replication licensing factor MCM4                        | 0.58212                                 | 3.94E-08           |
| EBF1;EBF2;EBF3 | Transcription factor COE3                                    | 0.57342                                 | 2.85E-06           |
| MCM3           | DNA replication licensing factor MCM3                        | 0.53704                                 | 6.34E-07           |
| PBK            | Lymphokine-activated killer T-cell-originated protein kinase | 0.51146                                 | 0.005872           |
| MCM6           | DNA replication licensing factor MCM6                        | 0.50724                                 | 2.18E-06           |
| NCAPD2         | Condensin complex subunit 1                                  | 0.44542                                 | 0.000284           |
| TRIP13         | Pachytene checkpoint protein 2 homolog                       | 0.43794                                 | 6.16E-08           |
| NCAPH          | Condensin complex subunit 2                                  | 0.4153                                  | 0.001812           |
| NCAPG          | Condensin complex subunit 3                                  | 0.39052                                 | 0.000692           |
| COL14A1        | Collagen alpha-1(XIV) chain                                  | 0.38104                                 | 7.09E-07           |
| NUF2           | Kinetochore protein Nuf2                                     | 0.34564                                 | 0.026019           |
| CYP1B1         | Cytochrome P450 1B1                                          | 0.31314                                 | 1.18E-06           |
| CPM            | Carboxypeptidase M                                           | 0.28808                                 | 4.38E-05           |
| KNTC1          | Kinetochore-associated protein 1                             | 0.27894                                 | 2.07E-05           |
| SMC4           | Structural maintenance of chromosomes protein 4              | 0.25502                                 | 1.08E-05           |
| SMC2           | Structural maintenance of chromosomes protein 2              | 0.208                                   | 0.001746           |
| ACO1           | Cytoplasmic aconitate hydratase                              | 0.17734                                 | 0.000311           |
| LAMB1          | Laminin subunit beta-1                                       | 0.16292                                 | 1.98E-05           |
