# Supplementary material for: Promitotic Action of Oenothera biennis on Senescent Human Dermal Fibroblasts
Source: MDPI journal article supplement (doi:10.3390/ijms232315153), 2022-12-02
Supplement: s1 [file s1]

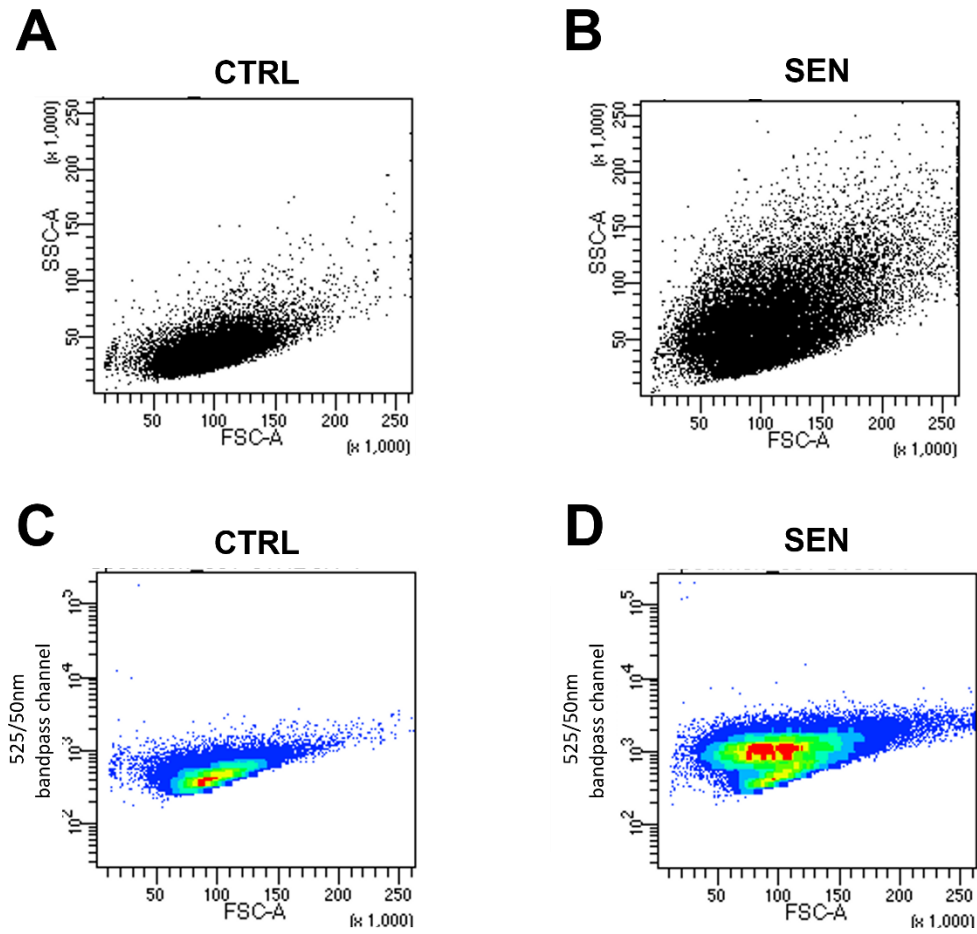

**Figure S1. Increase of cytoplasmic granularity and lipofuscin aggregates in  $H_2O_2$  treated cells.**  $H_2O_2$  treated cells (**B**) in comparison with control ones (**A**) showed in FACS (Fluorescence Activated Cell Sorting) analysis an increase of SSC intensity (Side Scatter) that is a measure of cytoplasmic granularity. It reflects the characteristic increment in lysosomal content of senescent cells. FSC (Forward Scatter) intensity represents the measure of the relative size of the cells. Moreover, in  $H_2O_2$  treated cells a population with high autofluorescence in 525/50nm bandpass channel from the 488nm excitation wavelength has been detected (**D**) in comparison with the control (**C**). This is a marker of senescent intra-lysosomal accumulation of lipofuscin aggregates.
