# Supplementary material for: Promitotic Action of Oenothera biennis on Senescent Human Dermal Fibroblasts
Source: MDPI journal article supplement (doi:10.3390/ijms232315153), 2022-12-02
Supplement: s1 [file s1]

**Table S4.** Statistically significant downregulated proteins in senescent NHDF cells after ObHex treatment vs untreated senescent NHDF.

| Genes    | First Protein Description                                              | Diff. (SEN ObHex-SEN Untreated) | adj.p-value |
|----------|------------------------------------------------------------------------|---------------------------------|-------------|
| SARS1    | Serine--tRNA ligase, cytoplasmic                                       | -0.07218                        | 0.032106    |
| PSMD2    | 26S proteasome non-ATPase regulatory subunit 2                         | -0.09294                        | 0.010652    |
| MAP4K4   | Mitogen-activated protein kinase kinase kinase 4                       | -0.0931                         | 0.043178    |
| ASAP2    | Arf-GAP with SH3 domain, ANK repeat and PH domain-containing protein 2 | -0.1026                         | 0.029708    |
| IQSEC1   | IQ motif and SEC7 domain-containing protein 1                          | -0.1178                         | 0.011567    |
| TP53I3   | Quinone oxidoreductase PIG3                                            | -0.1184                         | 0.000432    |
| TAOK3    | Serine/threonine-protein kinase TAO3                                   | -0.11934                        | 0.013636    |
| GCLM     | Glutamate--cysteine ligase regulatory subunit                          | -0.1198                         | 0.023221    |
| NPEPL1   | Probable aminopeptidase NPEPL1                                         | -0.1267                         | 0.017765    |
| ABHD14B  | Protein ABHD14B                                                        | -0.12796                        | 0.00735     |
| ITGA2    | Integrin alpha-2                                                       | -0.13014                        | 0.023285    |
| HSD17B12 | Very-long-chain 3-oxoacyl-CoA reductase                                | -0.13356                        | 0.003779    |
| PLCD1    | 1-phosphatidylinositol 4,5-bisphosphate phosphodiesterase delta-1      | -0.13386                        | 0.008673    |
| PRKAB1   | 5'-AMP-activated protein kinase subunit beta-1                         | -0.13852                        | 0.021847    |
| DNAJC16  | DnaJ homolog subfamily C member 16                                     | -0.14622                        | 0.010369    |
| SLC12A4  | Solute carrier family 12 member 4                                      | -0.15802                        | 0.002591    |
| SIRPA    | Tyrosine-protein phosphatase non-receptor type substrate 1             | -0.162                          | 0.003137    |
| CHP1     | Calcineurin B homologous protein 1                                     | -0.16454                        | 0.018309    |
| SYNJ1    | Synaptojanin-1                                                         | -0.16664                        | 0.001728    |
| PANK2    | Pantothenate kinase 2, mitochondrial                                   | -0.1721                         | 0.004042    |
| PIK3C3   | Phosphatidylinositol 3-kinase catalytic subunit type 3                 | -0.1758                         | 0.015054    |
| CAVIN2   | Caveolae-associated protein 2                                          | -0.1783                         | 0.000637    |
| ADAM17   | Disintegrin and metalloproteinase domain-containing protein 17         | -0.18568                        | 0.007884    |
| NCS1     | Neuronal calcium sensor 1                                              | -0.1872                         | 0.002146    |
| ADCY9    | Adenylate cyclase type 9                                               | -0.19242                        | 0.000295    |
| LMO7     | LIM domain only protein 7                                              | -0.202                          | 1.19E-06    |

|                         |                                                                               |          |          |
|-------------------------|-------------------------------------------------------------------------------|----------|----------|
| GPX1                    | Glutathione peroxidase 1                                                      | -0.20412 | 0.009193 |
| TIGAR                   | Fructose-2,6-bisphosphatase<br>TIGAR                                          | -0.20528 | 0.001872 |
| MTMR9                   | Myotubularin-related protein 9                                                | -0.22762 | 8.82E-05 |
| DGKA                    | Diacylglycerol kinase alpha                                                   | -0.24398 | 0.000113 |
| PALM                    | Paralemmin-1                                                                  | -0.26548 | 0.01812  |
| PALM2                   | Paralemmin-2                                                                  | -0.26738 | 4.09E-05 |
| LAMC1                   | Laminin subunit gamma-1                                                       | -0.27732 | 6.83E-07 |
| PRKAR2A;PRKAR2B         | cAMP-dependent protein kinase<br>type II-alpha regulatory subunit             | -0.28102 | 2.61E-05 |
| HSPA4L                  | Heat shock 70 kDa protein 4L                                                  | -0.28498 | 7.41E-05 |
| FDXR                    | NADPH:adrenodoxin<br>oxidoreductase, mitochondrial                            | -0.30498 | 2.5E-06  |
| STK39                   | STE20/SPS1-related proline-<br>alanine-rich protein kinase                    | -0.3394  | 0.000342 |
| CES2                    | Cocaine esterase                                                              | -0.3908  | 1.01E-05 |
| ASDURF                  | ASNSD1 upstream open reading<br>frame protein                                 | -0.41014 | 1.13E-05 |
| FAM117B                 | Protein FAM117B                                                               | -0.4196  | 0.001711 |
| AKT1S1                  | Proline-rich AKT1 substrate 1                                                 | -0.47006 | 3.31E-05 |
| ASAP1;ASAP2             | Arf-GAP with SH3 domain,<br>ANK repeat and PH domain-<br>containing protein 2 | -0.69434 | 8.12E-05 |
| EPB41L1;EPB41L2;EPB41L3 | Band 4.1-like protein 2                                                       | -1.04344 | 6.77E-06 |
| CYB561D2                | Cytochrome b561 domain-<br>containing protein 2                               | -1.0961  | 6.78E-05 |
| GLRX                    | Glutaredoxin-1                                                                | -1.42864 | 1.55E-05 |
| C15orf40                | UPF0235 protein C15orf40                                                      | -2.01816 | 1.54E-06 |
