# Supplementary material for: Promitotic Action of Oenothera biennis on Senescent Human Dermal Fibroblasts
Source: Int J Mol Sci. 2022 Dec 2;23(23):15153. doi: 10.3390/ijms232315153 (PMC9735661; doi:10.3390/ijms232315153)
Supplement: Supplementary file 1 [file ijms-23-15153-s001.zip]

Archive with 8 entries (8 files):
- Figure S1.pdf
- Table S1. Mass data analysis results.xlsm
- Table S2. Reactome enrichment analysis of upregulated proteins in H2O2 treated NHDF cells.csv
- Table S3. Reactome enrichment analysis of downregulated proteins in H2O2 treated NHDF cells.csv
- Table S4. Statistically significant downregulated proteins in senescent NHDF cells after ObHEx treatment.pdf
- Table S5. Statistically significant upregulated proteins in senescent NHDF cells after ObHEx treatment.pdf
- Table S6 Reactome enrichment analysis of downregulated proteins in senescent NHDF cells after ObHEx treatment.csv
- Table S7 Reactome enrichment analysis of upregulated proteins in senescent NHDF cells after ObHEx treatment.csv
