# Supplementary material for: Promitotic Action of Oenothera biennis on Senescent Human Dermal Fibroblasts
Source: Int J Mol Sci. 2022 Dec 2;23(23):15153. doi: 10.3390/ijms232315153 (PMC9735661; doi:10.3390/ijms232315153)
Supplement: Supplementary file 1 [file ijms-23-15153-s001.zip › Table S1. Mass data analysis results.xlsm]

## Sheet: Feuil1
	Project	SaCE
	Exp Name	SaCE CL DIA wo speclib with Perseus SEN_CTRL statistic
	Link	2022-04-19
		LFQ INTENSITY																				Protein Metadata						SENESCENCE METADATA				MS METADATA
		CTRL_1	CTRL_2	CTRL_3	CTRL_4	CTRL_5	CTRL_ObHEx_1	CTRL_ObHEx_2	CTRL_ObHEx_3	CTRL_ObHEx_4	CTRL_ObHEx_5	SEN_1	SEN_2	SEN_3	SEN_4	SEN_5	SEN_ObHEx_1	SEN_ObHEx_2	SEN_ObHEx_3	SEN_ObHEx_4	SEN_ObHEx_5	name	Genes	Protein_Names	Protein_Group	Protein_IDs	First_Protein_Description	Categories	Senescent.cells..included.fibroblasts.in.which.senescence.is.induced.not.necessarily.by.IR..RAS.or.ATV.treatment.	Fibroblasts.in.which.senescence.is.induced.by.IR..RAS.or.ATV.treatment..SASP.ATLAS.	Intrisically.Aged.Skin.Fibroblasts.vs.Young	n_Precursor_CTRL_1	n_Precursor_CTRL_2	n_Precursor_CTRL_3	n_Precursor_CTRL_4	n_Precursor_CTRL_5	n_Precursor_CTRL_ObHex_1	n_Precursor_CTRL_ObHex_2	n_Precursor_CTRL_ObHex_3	n_Precursor_CTRL_ObHex_4	n_Precursor_CTRL_ObHex_5	n_Precursor_SEN_1	n_Precursor_SEN_2	n_Precursor_SEN_3	n_Precursor_SEN_4	n_Precursor_SEN_5	n_Precursor_SEN_ObHex_1	n_Precursor_SEN_ObHex_2	n_Precursor_SEN_ObHex_3
		19.2835	19.4062	19.2995	19.2596	19.2799	19.232	19.206	19.3271	19.2665	19.4361	19.3421	19.2948	19.4267	19.1939	19.147	19.2045	19.178	19.1538	19.0857	19.2025	YWHAB.2	YWHAB	1433B_HUMAN	P31946	P31946	14-3-3 protein beta/alpha	SASP	NA	altered	NA	19	18	18	19	18	19	19	19	19	17	17	19	20	17	17	15	16	17
		19.7841	20.1042	20.4439	20.3109	20.232	20.2841	20.1498	20.0866	20.3704	20.4384	20.1607	20.1755	20.1575	20.123	19.9736	19.9931	20.0711	19.8823	19.9302	19.9445	SFN	SFN;YWHAB;YWHAE;YWHAG;YWHAH;YWHAQ;YWHAZ	1433B_HUMAN;1433E_HUMAN;1433F_HUMAN;1433G_HUMAN;1433S_HUMAN;1433T_HUMAN;1433Z_HUMAN	P27348;P31946;P31947;P61981;P62258;P63104;Q04917	P31946;P62258;Q04917;P61981;P31947;P27348;P63104	14-3-3 protein theta	SASP	NA	altered;down;up	NA	4	4	4	4	4	4	4	4	4	4	4	4	4	4	4	4	4	4
		10.1119	9.85712	10.176	10.7836	10.9936	11.0451	9.67773	8.76881	10.3749	10.4984	9.4713	9.91578	9.8954	9.32094	9.32824	10.5582	10.1384	10.9661	9.9917	9.73452	YWHAB.5	YWHAB;YWHAG;YWHAH	1433B_HUMAN;1433F_HUMAN;1433G_HUMAN	P31946;P61981;Q04917	P31946;Q04917;P61981	14-3-3 protein beta/alpha	SASP	NA	altered	NA	1	1	1	1	1	1	1	0	1	1	1	1	1	0	0	0	1	0
		14.1	14.0216	13.8139	14.3719	14.1423	14.5852	13.3636	13.1193	13.4236	13.7311	13.0903	13.7652	13.9841	13.5063	13.3764	13.5798	13.8845	13.3077	13.1759	13.2094	YWHAB.4	YWHAB;YWHAG;YWHAH;YWHAZ	1433B_HUMAN;1433F_HUMAN;1433G_HUMAN;1433Z_HUMAN	P31946;P61981;P63104;Q04917	P31946;Q04917;P61981;P63104	14-3-3 protein beta/alpha	SASP	NA	altered	NA	3	3	3	3	3	3	3	3	3	3	3	3	2	2	2	2	2	2
		16.5275	16.6305	16.8911	16.7275	16.7273	16.8235	17.0671	16.7044	17.5653	17.8572	17.5911	17.5891	17.5281	17.3273	17.4463	16.9538	17.7629	17.3723	17.2722	17.1809	YWHAB.3	YWHAB;YWHAG	1433B_HUMAN;1433G_HUMAN	P31946;P61981	P31946;P61981	14-3-3 protein beta/alpha	SASP	NA	altered	NA	10	10	11	10	9	12	9	9	10	12	11	12	11	11	11	11	11	11
		16.6324	16.6656	16.4858	16.5262	16.1092	16.0991	16.459	16.5269	16.2026	16.3634	16.4009	16.1471	16.2504	16.2155	16.0916	16.0033	15.1362	16.0213	16.091	15.9294	SFN.1	SFN;YWHAB;YWHAQ;YWHAZ	1433B_HUMAN;1433S_HUMAN;1433T_HUMAN;1433Z_HUMAN	P27348;P31946;P31947;P63104	P31946;P31947;P27348;P63104	14-3-3 protein theta	SASP	NA	altered;down;up	NA	1	1	1	1	1	1	1	1	1	1	1	1	1	1	1	1	1	1
		17.2432	17.3931	16.8251	17.2578	16.7107	16.9405	17.0514	17.1233	16.7065	16.8455	16.7228	16.717	16.7537	16.5874	16.3656	17.0067	16.5941	16.8325	16.5465	16.813	YWHAB	YWHAB;YWHAQ	1433B_HUMAN;1433T_HUMAN	P27348;P31946	P31946;P27348	14-3-3 protein theta	SASP	NA	altered;up	NA	1	1	1	1	1	1	1	1	1	1	1	1	1	1	1	1	1	1
		18.0412	18.1517	18.4237	18.1707	18.4153	18.4885	18.2616	18.2715	18.803	18.6396	18.6359	18.7603	18.5388	18.616	18.7097	18.7368	18.7189	18.6344	18.7896	18.7113	YWHAB.1	YWHAB;YWHAQ;YWHAZ	1433B_HUMAN;1433T_HUMAN;1433Z_HUMAN	P27348;P31946;P63104	P31946;P27348;P63104	14-3-3 protein theta	SASP	NA	altered;up	NA	6	6	6	6	6	6	6	6	6	6	6	6	6	6	6	5	6	6
		20.2699	20.2146	20.1018	20.1525	20.1333	20.2478	20.2923	20.2434	20.4173	20.3759	20.3729	20.3168	20.3523	20.3262	20.3078	20.2742	20.4088	20.4741	20.4228	20.4382	YWHAE	YWHAE	1433E_HUMAN	P62258	P62258	14-3-3 protein epsilon	SASP	NA	altered	NA	54	56	56	55	58	59	59	58	62	60	59	57	59	58	56	58	60	60
		18.9645	18.9779	18.6937	18.8237	18.7521	18.7708	18.8467	18.9051	18.9757	19.0334	18.7662	18.8787	18.8054	18.851	18.8896	18.8112	18.8843	18.8822	18.8661	18.9068	YWHAH	YWHAH	1433F_HUMAN	Q04917	Q04917	14-3-3 protein eta	SASP	NA	altered	NA	22	25	25	25	24	26	25	25	25	25	21	25	24	23	24	24	23	24
		16.8597	17.0239	16.4549	16.7131	16.4869	16.84	16.8642	16.8421	16.4877	16.609	16.3562	16.5138	16.2671	16.1156	15.8756	16.9535	16.4415	16.2293	16.209	16.3864	SFN.3	SFN;YWHAG;YWHAH;YWHAZ	1433F_HUMAN;1433G_HUMAN;1433S_HUMAN;1433Z_HUMAN	P31947;P61981;P63104;Q04917	Q04917;P61981;P31947;P63104	14-3-3 protein sigma	SASP	NA	altered;down	NA	1	1	1	1	1	1	1	1	1	1	1	1	1	1	1	1	1	1
		11.5703	12.4479	9.27563	9.15396	12.5305	11.5453	9.79297	12.3481	14.183	12.6641	12.3526	12.3191	13.1549	12.7751	12.5325	10.3717	13.2093	12.9587	10.3024	10.5173	YWHAG.1	YWHAG;YWHAH;YWHAZ	1433F_HUMAN;1433G_HUMAN;1433Z_HUMAN	P61981;P63104;Q04917	Q04917;P61981;P31947;P63104	14-3-3 protein gamma	SASP	NA	altered	NA	1	1	0	0	1	1	0	1	1	1	1	1	1	1	1	0	1	1
		19.0541	18.9542	18.698	18.7075	18.8081	18.8196	18.8498	18.8121	18.9592	19.0896	19.1532	19.2626	19.2635	19.2762	19.1918	19.297	19.1509	19.1299	19.3032	19.2384	YWHAG	YWHAG	1433G_HUMAN	P61981	P61981	14-3-3 protein gamma	SASP	NA	altered	NA	20	22	22	23	21	24	22	22	21	23	23	23	22	24	22	22	22	24
		18.8107	19.4679	19.2039	19.3515	19.0983	18.9998	18.9484	19.0763	18.7891	18.7988	18.5944	18.3776	18.531	18.8706	18.4208	18.6384	18.1832	18.3804	18.6793	18.7251	SFN.2	SFN	1433S_HUMAN	P31947	P31947	14-3-3 protein sigma	SASP	NA	down	NA	1	1	2	3	2	1	5	1	1	1	5	1	1	1	1	1	1	1
		18.7787	18.5391	18.3404	18.3656	18.4979	18.5965	18.5867	18.4228	18.5035	18.5881	18.6972	18.6933	18.6805	18.6156	18.5533	18.6327	18.5808	18.5731	18.6058	18.6265	YWHAQ	YWHAQ	1433T_HUMAN	P27348	P27348	14-3-3 protein theta	SASP	NA	up	NA	29	31	30	31	31	32	32	32	30	32	30	28	31	29	28	29	29	29
		19.1577	19.1906	18.942	19.1272	19.0656	19.0232	19.0208	19.0418	19.0811	19.2263	19.018	19.1473	19.1563	19.0037	18.9408	19.0655	19.1208	19.0954	18.9906	19.0242	YWHAZ	YWHAZ	1433Z_HUMAN	P63104	P63104	14-3-3 protein zeta/delta	SASP	NA	altered	NA	38	39	39	39	36	37	39	38	39	40	37	37	38	38	38	38	38	38
		10.8592	11.0587	10.6682	11.004	11.0744	11.3182	10.8492	11.5537	10.9403	10.804	10.8046	11.2582	10.8855	10.5431	10.8732	10.9051	11.1352	10.8987	10.7637	10.0485	ACCS	ACCS	1A1L1_HUMAN	Q96QU6	Q96QU6	1-aminocyclopropane-1-carboxylate synthase-like protein 1	NA	NA	NA	NA	1	1	1	1	1	1	1	1	1	1	1	1	1	1	1	1	1	1
		13.7999	13.8661	14.0534	14.173	13.8858	13.9273	13.973	13.9079	13.9883	14.0134	13.7218	13.6681	13.7335	13.5919	13.4847	13.9145	13.696	13.8184	13.6858	13.6429	PPP2R5A	PPP2R5A	2A5A_HUMAN	Q15172	Q15172	Serine/threonine-protein phosphatase 2A 56 kDa regulatory subunit alpha isoform	NA	NA	NA	NA	13	16	15	10	15	14	13	13	14	12	14	14	13	13	12	14	12	12
		13.4972	13.5032	13.2736	13.3329	13.5292	13.688	13.8762	13.6434	13.8857	14.0013	13.6706	13.8197	13.6336	13.6192	13.4703	13.5374	13.6759	13.7007	13.5714	13.8035	PPP2R5A.1	PPP2R5A;PPP2R5E	2A5A_HUMAN;2A5E_HUMAN	Q15172;Q16537	Q15172;Q16537	Serine/threonine-protein phosphatase 2A 56 kDa regulatory subunit alpha isoform	NA	NA	NA	NA	2	2	2	2	2	2	2	2	2	2	2	2	2	2	2	2	2	2
		12.2991	12.1858	11.9166	12.2924	12.3405	12.3543	12.3799	12.2336	12.1911	12.1202	12.5711	12.2881	12.5299	12.5419	12.473	12.415	12.2966	12.3642	12.2991	12.3617	PPP2R5B	PPP2R5B	2A5B_HUMAN	Q15173	Q15173	Serine/threonine-protein phosphatase 2A 56 kDa regulatory subunit beta isoform	NA	NA	NA	NA	6	7	7	7	6	7	7	6	7	5	6	6	6	5	5	6	5	6
		14.6529	14.8197	15.0574	14.8741	14.9794	14.931	14.9215	15.0556	15.0134	14.925	14.7655	14.6882	14.7588	14.7652	14.5912	14.7729	14.8039	14.5785	14.4159	14.6158	PPP2R5B.1	PPP2R5B;PPP2R5E	2A5B_HUMAN;2A5E_HUMAN	Q15173;Q16537	Q15173;Q16537	Serine/threonine-protein phosphatase 2A 56 kDa regulatory subunit beta isoform	NA	NA	NA	NA	1	1	1	1	1	1	1	1	1	1	1	1	1	1	1	1	1	1
		14.3031	14.4083	14.3982	14.4591	14.2463	14.5172	14.2977	14.3703	14.5924	14.3361	14.3381	14.396	14.3725	14.2117	14.4704	14.3188	14.3171	14.4701	14.4566	14.3562	PPP2R5D	PPP2R5D	2A5D_HUMAN	Q14738	Q14738	Serine/threonine-protein phosphatase 2A 56 kDa regulatory subunit delta isoform	NA	NA	NA	NA	25	27	25	27	25	24	22	24	27	27	23	22	27	25	21	24	23	22
		15.8362	15.8846	15.7068	15.723	15.7505	15.9049	15.8176	15.7953	15.9728	15.9076	15.6481	15.7726	15.7681	15.623	15.5681	15.8117	15.6806	15.6789	15.7538	15.8031	PPP2R5C.1	PPP2R5C;PPP2R5D	2A5D_HUMAN;2A5G_HUMAN	Q13362;Q14738	Q14738;Q13362	Serine/threonine-protein phosphatase 2A 56 kDa regulatory subunit gamma isoform	NA	NA	NA	NA	6	6	6	6	6	6	6	7	7	6	6	7	7	7	6	7	7	6
		14.9667	14.7868	14.5023	14.7223	14.8543	14.7826	14.8654	14.829	14.8047	14.8847	14.911	14.9275	14.9279	14.9384	14.9493	14.9085	14.8767	14.8829	14.7951	14.8597	PPP2R5E	PPP2R5E	2A5E_HUMAN	Q16537	Q16537	Serine/threonine-protein phosphatase 2A 56 kDa regulatory subunit epsilon isoform	NA	NA	NA	NA	11	11	11	11	12	11	11	11	12	12	12	11	12	12	12	12	12	10
		11.452	10.1214	10.533	9.68355	8.32004	8.73749	10.4381	9.05589	9.50227	10.0789	10.1941	11.0459	9.49044	10.7466	10.7265	10.6204	10.1887	10.3068	11.1801	10.646	PPP2R5C.2	PPP2R5C;PPP2R5E	2A5E_HUMAN;2A5G_HUMAN	Q13362;Q16537	Q16537;Q13362	Serine/threonine-protein phosphatase 2A 56 kDa regulatory subunit gamma isoform	NA	NA	NA	NA	0	0	0	1	1	1	0	1	1	1	0	1	1	1	1	1	1	1
		14.6554	14.569	14.5402	14.5496	14.5479	14.4884	14.4528	14.415	14.6713	14.5745	14.3312	14.4531	14.4671	14.3843	14.3343	14.4999	14.2468	14.4263	14.3593	14.3495	PPP2R5C	PPP2R5C	2A5G_HUMAN	Q13362	Q13362	Serine/threonine-protein phosphatase 2A 56 kDa regulatory subunit gamma isoform	NA	NA	NA	NA	13	12	12	15	14	16	12	14	16	15	14	15	14	13	14	14	11	15
		17.9872	17.9247	17.7799	17.8943	18.0532	18.0965	18.0631	17.8658	18.1306	18.0494	18.0789	18.0179	18.1086	17.913	18.0389	17.9406	17.9082	17.9309	18.0484	18.0148	PPP2R1A	PPP2R1A	2AAA_HUMAN	P30153	P30153	Serine/threonine-protein phosphatase 2A 65 kDa regulatory subunit A alpha isoform	SASP	NA	altered	NA	39	41	38	40	40	42	40	39	40	40	40	39	40	41	39	40	40	39
		15.5973	15.4197	15.1977	15.0887	15.3071	15.3481	15.3579	15.1133	15.2603	15.2205	15.2259	15.3408	15.2008	15.1333	15.1046	15.1872	14.9007	15.0618	15.1562	15.146	PPP2R1A.1	PPP2R1A;PPP2R1B	2AAA_HUMAN;2AAB_HUMAN	P30153;P30154	P30153;P30154	Serine/threonine-protein phosphatase 2A 65 kDa regulatory subunit A alpha isoform	SASP	NA	altered	NA	13	12	13	13	12	12	13	12	12	13	13	13	13	13	12	12	12	13
		12.8796	12.4815	12.3445	12.2266	12.5664	12.7851	12.7153	12.5019	12.5227	12.5035	12.491	12.5752	12.4761	12.6301	12.64	12.62	12.5388	12.5368	12.6324	12.7075	PPP2R1B	PPP2R1B	2AAB_HUMAN	P30154	P30154	Serine/threonine-protein phosphatase 2A 65 kDa regulatory subunit A beta isoform	NA	NA	NA	NA	9	12	9	11	11	12	10	11	9	9	9	8	10	8	9	10	7	10
		15.752	15.768	15.7723	15.8032	15.9313	15.736	15.689	15.7353	15.7506	15.8	15.8053	15.9904	15.8007	15.8465	15.9133	15.9259	15.7544	15.6946	15.7704	15.844	PPP2R2A	PPP2R2A	2ABA_HUMAN	P63151	P63151	Serine/threonine-protein phosphatase 2A 55 kDa regulatory subunit B alpha isoform	NA	NA	NA	NA	14	17	18	17	18	17	16	18	17	18	17	17	18	17	18	18	18	18
		16.1108	15.9113	15.9708	15.9971	15.9899	16.0404	16.1197	16.0612	15.9524	15.947	16.2755	16.3041	16.2506	16.3502	16.2861	16.1368	16.2671	16.2783	16.309	16.379	PPP2R2A.1	PPP2R2A;PPP2R2D	2ABA_HUMAN;2ABD_HUMAN	P63151;Q66LE6	P63151;Q00005;Q66LE6;Q9Y2T4	Serine/threonine-protein phosphatase 2A 55 kDa regulatory subunit B alpha isoform	NA	NA	NA	NA	9	10	10	9	10	9	9	9	9	9	9	9	9	9	9	10	9	9
		12.8863	12.8873	12.844	12.8001	13.0018	12.8281	13.0965	13.0778	12.9374	12.8726	13.5044	13.3425	13.4754	13.6008	13.5926	13.5526	13.2611	13.4554	13.6238	13.443	PPP2R2D	PPP2R2D	2ABD_HUMAN	Q66LE6	Q66LE6	Serine/threonine-protein phosphatase 2A 55 kDa regulatory subunit B delta isoform	NA	NA	NA	NA	6	6	6	6	7	6	8	6	7	6	7	7	7	8	6	8	8	8
		11.8033	11.8681	11.6838	11.9294	12.1572	12.1464	12.349	12.4185	12.113	12.3192	12.1638	12.4038	12.2738	12.0853	12.0647	12.5234	12.4568	12.1148	12.3282	12.3772	HSD3B7	HSD3B7	3BHS7_HUMAN	Q9H2F3	Q9H2F3	3 beta-hydroxysteroid dehydrogenase type 7	NA	NA	NA	NA	5	6	6	5	5	4	5	5	6	6	5	5	4	6	4	5	4	6
		13.8184	13.7171	13.6125	13.606	13.6128	13.8908	13.8136	13.4956	13.7054	13.588	13.629	13.5598	13.6697	13.5426	13.5882	13.7598	13.4291	13.5947	13.7707	13.7156	SH3BP1	SH3BP1	3BP1_HUMAN	Q9Y3L3	Q9Y3L3;Q6ZT62	SH3 domain-binding protein 1	NA	NA	NA	NA	20	17	17	16	19	19	21	17	18	19	21	18	21	20	19	22	18	19
		14.1324	14.1074	13.9759	14.0018	13.9139	14.1731	14.1744	14.1234	14.0982	14.0403	14.3204	14.2948	14.4138	14.3184	14.235	14.4327	14.2911	14.2441	14.4378	14.2274	SH3BP2	SH3BP2	3BP2_HUMAN	P78314	P78314	SH3 domain-binding protein 2	NA	NA	NA	NA	18	19	17	21	18	21	21	21	20	20	19	19	21	20	18	20	19	21
		11.9069	11.9296	11.7811	11.6268	11.8266	12.1574	11.9711	11.91	11.6973	12.2328	12.2304	12.0609	11.9401	12.0803	12.1233	11.9992	11.9953	12.0329	11.9798	11.8263	SH3BP5	SH3BP5	3BP5_HUMAN	O60239	O60239	SH3 domain-binding protein 5	NA	NA	NA	NA	7	6	7	7	7	7	7	7	6	6	6	7	7	6	5	6	5	6
		12.5178	12.1062	11.9199	12.1502	12.3522	12.3859	12.4694	12.2043	12.3831	12.1966	12.5889	12.5102	12.6407	12.4797	12.6057	12.457	12.3996	12.3652	12.5097	12.4836	SH3BP5L	SH3BP5L	3BP5L_HUMAN	Q7L8J4	Q7L8J4	SH3 domain-binding protein 5-like	NA	NA	NA	NA	9	7	7	8	8	8	8	8	8	8	8	9	8	10	8	8	9	8
		11.2867	11.2372	11.0193	10.9128	11.1414	11.3519	11.3456	11.4326	10.9714	11.4302	11.0399	11.4245	10.9772	11.0575	11.09	11.4511	10.9746	10.9826	11.2589	11.0352	HAAO	HAAO	3HAO_HUMAN	P46952	P46952	3-hydroxyanthranilate 3,4-dioxygenase	NA	NA	NA	NA	4	4	3	3	2	4	4	3	4	4	3	2	2	3	1	3	1	3
		17.1171	17.1056	17.4013	17.1146	17.0521	17.2231	17.117	17.0799	17.5004	17.4268	17.2638	17.2629	17.2391	17.2386	17.2082	17.1855	17.3325	17.1678	17.1823	17.2122	HIBADH	HIBADH	3HIDH_HUMAN	P31937	P31937	3-hydroxyisobutyrate dehydrogenase, mitochondrial	NA	NA	NA	NA	23	27	27	27	28	26	24	28	29	30	25	25	26	25	23	22	26	26
		15.1418	15.2349	15.2082	15.1157	15.2638	15.2267	15.1216	15.1382	15.1562	15.3031	14.9771	14.9643	14.9551	14.8536	14.918	15.007	14.9064	14.8464	14.9331	14.8806	MPG	MPG	3MG_HUMAN	P29372	P29372	DNA-3-methyladenine glycosylase	NA	NA	NA	NA	10	10	10	9	9	10	10	10	10	10	10	9	10	9	9	10	9	10
		11.2893	11.6221	10.6532	11.7685	11.4217	12.06	11.6817	11.12	11.5578	11.1109	11.2747	11.1127	11.5116	11.2212	10.6777	11.4173	10.0594	10.4808	10.3473	10.6419	EIF4EBP1	EIF4EBP1	4EBP1_HUMAN	Q13541	Q13541	Eukaryotic translation initiation factor 4E-binding protein 1	SASP	NA	up	NA	1	1	1	1	1	1	1	1	1	1	1	1	1	1	1	1	1	1
		9.39269	9.60519	9.43808	9.23377	8.33114	10.0301	10.237	9.59493	9.65394	9.01402	10.6685	9.74747	10.2882	10.1936	9.09464	9.67421	8.6016	10.1198	9.83947	9.48503	EIF4EBP2	EIF4EBP2	4EBP2_HUMAN	Q13542	Q13542	Eukaryotic translation initiation factor 4E-binding protein 2	NA	NA	NA	NA	1	2	1	0	1	0	2	1	1	2	2	1	2	2	1	1	1	2
		12.963	12.5775	12.2928	12.5235	12.5271	12.8317	12.8004	12.5695	12.6347	12.4954	13.0668	12.6871	12.7331	12.8446	12.6924	12.7884	12.6278	12.6285	12.803	12.8041	EIF4ENIF1	EIF4ENIF1	4ET_HUMAN	Q9NRA8	Q9NRA8	Eukaryotic translation initiation factor 4E transporter	NA	NA	NA	NA	12	12	16	11	14	15	14	16	14	15	10	11	13	14	12	12	11	13
		17.129	17.0741	16.9131	17.0598	17.1607	17.1345	17.0627	17.0741	17.1913	17.2127	17.2741	17.2574	17.2961	17.2124	17.2092	17.2348	16.9234	17.0793	16.9927	17.1243	SLC3A2	SLC3A2	4F2_HUMAN	P08195	P08195	4F2 cell-surface antigen heavy chain	SAASP/SASP	NA	down	up	35	40	41	42	38	40	37	40	40	40	38	34	36	38	38	39	33	36
		15.0904	15.1056	15.1451	15.1441	15.1967	15.1097	15.2519	15.1132	15.1297	15.1445	15.2283	15.2148	15.1604	15.1965	15.2503	15.1808	15.2616	15.1545	15.2771	15.1977	NT5C3A	NT5C3A	5NT3A_HUMAN	Q9H0P0	Q9H0P0	Cytosolic 5'-nucleotidase 3A	NA	NA	NA	NA	16	17	14	16	17	15	17	17	17	16	16	14	16	15	11	16	13	15
		13.9927	14.0012	13.9404	13.9212	14.0552	14.1204	13.8524	14.0009	13.894	14.0922	13.8546	13.9316	13.9265	13.8993	13.9566	14.0361	13.9391	13.8944	14.1481	13.9469	NT5C3B	NT5C3B	5NT3B_HUMAN	Q969T7	Q969T7	7-methylguanosine phosphate-specific 5'-nucleotidase	NA	NA	NA	NA	5	6	5	8	8	7	7	6	7	7	6	5	7	8	8	7	3	6
		17.9687	17.9519	18.0446	18.016	18.0009	17.9365	17.9537	17.9515	18.1127	18.2016	18.0332	18.2146	18.156	18.1382	18.1902	18.031	18.0598	18.1032	18.0985	18.1883	NT5C2	NT5C2	5NTC_HUMAN	P49902	P49902	Cytosolic purine 5'-nucleotidase	NA	NA	NA	NA	29	33	33	32	32	33	32	34	33	34	33	33	34	32	30	32	30	33
		18.4317	18.4817	18.3968	18.4292	18.3959	18.508	18.5681	18.5586	18.5827	18.6945	18.9172	18.9532	18.8966	18.9196	18.8897	18.9199	18.8975	18.8794	18.8564	18.9251	NT5E	NT5E	5NTD_HUMAN	P21589	P21589	5'-nucleotidase	SAASP/SASP	NA	altered	up	45	51	51	47	48	52	51	51	54	51	50	52	49	52	47	50	50	50
		17.4888	17.5696	17.373	17.548	17.4189	17.5197	17.5595	17.5529	17.5449	17.6389	17.539	17.677	17.5621	17.5951	17.5185	17.6397	17.5938	17.582	17.5662	17.5557	PGD	PGD	6PGD_HUMAN	P52209	P52209	6-phosphogluconate dehydrogenase, decarboxylating	SASP	NA	altered	NA	35	37	37	37	34	38	37	38	38	38	37	37	37	37	34	36	35	36
		17.1782	17.2201	16.9647	17.061	17.0275	17.1364	17.2355	17.2014	17.0918	17.142	17.3601	17.3947	17.283	17.2781	17.277	17.0337	17.1143	17.3061	16.9432	17.1483	PGLS	PGLS	6PGL_HUMAN	O95336	O95336	6-phosphogluconolactonase	SASP	NA	altered	NA	19	19	18	19	19	18	19	19	19	19	19	18	18	19	19	19	19	19
		14.737	14.6095	14.5473	14.5291	14.5574	14.4078	14.5962	14.5834	14.5397	14.5922	14.1682	14.3223	14.1985	14.2261	14.1754	14.3585	14.3248	14.3556	14.2778	14.3603	NUDT1	NUDT1	8ODP_HUMAN	P36639	P36639	7,8-dihydro-8-oxoguanine triphosphatase	NA	NA	NA	NA	6	6	6	6	5	6	6	6	6	5	6	5	6	5	6	6	5	6
		14.6636	14.8334	14.7885	14.8839	14.8365	14.7822	14.8425	14.8165	14.8707	14.8989	14.5592	14.747	14.4851	14.5131	14.6081	14.7398	14.6156	14.5965	14.6573	14.5955	ALDH16A1	ALDH16A1	A16A1_HUMAN	Q8IZ83	Q8IZ83	Aldehyde dehydrogenase family 16 member A1	SASP	NA	down	NA	20	22	22	21	22	21	19	22	22	21	20	20	21	21	19	20	20	21
		14.0558	14.1557	14.0474	14.1241	14.1799	14.3624	14.1648	14.2482	14.2314	14.0691	14.0813	13.9589	14.2363	14.0732	14.0553	14.2107	13.9627	13.9483	14.0649	14.1394	ATG16L1	ATG16L1	A16L1_HUMAN	Q676U5	Q676U5	Autophagy-related protein 16-1	NA	NA	NA	NA	23	20	20	21	24	24	23	23	21	24	22	20	21	22	18	21	21	22
		11.0854	11.9979	11.0361	12.8237	11.9297	12.1784	12.2348	12.8639	12.4246	12.1272	12.2155	11.6917	12.5529	10.9783	11.843	11.7924	12.1001	11.2963	11.4391	11.713	SERPINA1	SERPINA1	A1AT_HUMAN	P01009	P01009	Alpha-1-antitrypsin	SASP	NA	altered	NA	2	1	1	2	1	2	2	2	3	3	2	2	3	2	1	2	2	1
		10.0729	9.84782	11.1229	11.1787	11.3689	10.2223	10.0963	9.6895	10.2385	11.0568	10.1497	11.1853	10.1344	9.69661	10.2545	9.2484	10.8224	10.426	10.5263	10.2198	ANKRD20A4P	ANKRD20A4P;ANKRD20A8P	A20A4_HUMAN;AN20B_HUMAN	Q4UJ75;Q5CZ79	Q4UJ75;Q5CZ79	Putative ankyrin repeat domain-containing protein 20A4	NA	NA	NA	NA	0	0	0	0	0	1	0	0	1	0	1	0	0	1	0	0	1	1
		15.9577	15.7731	15.9053	15.7148	15.8788	15.4741	15.3944	15.5955	15.6711	15.6352	15.7922	15.6569	15.6775	15.6104	15.5602	15.753	15.7538	15.2632	15.4421	15.3833	A2M	A2M	A2MG_HUMAN	P01023	P01023	Alpha-2-macroglobulin	SASP	NA	down	NA	20	23	23	25	23	22	21	23	24	21	19	23	23	21	23	23	22	24
		15.5119	15.0844	15.3959	14.8795	15.2822	14.7928	14.3194	14.3951	15.0776	15.5474	15.5542	15.0207	15.1161	14.6785	14.9212	14.4365	15.0419	13.6439	13.9171	13.8955	A2M.1	A2M;PZP	A2MG_HUMAN;PZP_HUMAN	P01023;P20742	P01023;P20742	Alpha-2-macroglobulin	SASP	NA	down	NA	9	7	7	7	7	5	7	7	7	8	9	8	9	7	9	9	9	7
		9.53143	10.179	10.1458	9.14969	11.0337	11.2198	11.924	10.3217	10.1373	10.2215	10.4971	10.9073	9.99801	10.664	10.4671	11.0628	10.3096	9.50572	9.16339	9.38274	A2ML1	A2ML1	A2ML1_HUMAN	A8K2U0	A8K2U0	Alpha-2-macroglobulin-like protein 1	NA	NA	NA	NA	0	1	2	0	0	5	6	0	0	1	0	0	0	0	0	2	0	0
		14.9228	14.7414	14.7712	14.6996	14.773	14.884	14.9849	14.8798	14.8314	14.796	15.021	14.9763	15.0729	15.0338	15.0462	15.0248	15.0751	14.9917	15.1191	15.1135	APP	APP	A4_HUMAN	P05067	P05067	Amyloid-beta precursor protein	SASP	NA	altered	NA	28	30	32	30	34	34	30	31	34	32	30	33	32	31	31	29	32	31
		13.7072	15.02	14.7422	14.5724	14.73	14.3868	13.948	14.1926	13.6052	13.7913	14.2873	13.4502	13.5616	14.5443	13.2342	13.8523	13.3702	13.7565	12.5673	14.1564	APLP2	APLP2;APP	A4_HUMAN;APLP2_HUMAN	P05067;Q06481	P05067;Q06481	Amyloid-beta precursor protein	SASP	NA	altered	NA	1	1	1	1	1	1	1	1	1	1	1	1	1	1	1	1	1	1
		11.7168	11.4983	11.5474	11.3535	11.2946	11.4235	11.7124	11.4654	11.5353	11.49	11.4842	11.6803	11.6395	11.5891	11.9105	11.9209	11.5608	11.9183	11.7806	11.7856	A4GALT	A4GALT	A4GAT_HUMAN	Q9NPC4	Q9NPC4	Lactosylceramide 4-alpha-galactosyltransferase	NA	NA	NA	NA	2	3	3	3	2	3	3	2	3	2	3	3	3	2	2	3	2	3
		10.9611	11.8217	11.5952	11.5295	11.5245	11.4598	11.393	11.4371	11.4803	11.3896	11.6804	12.075	11.3826	10.9809	11.1645	11.442	11.682	11.5093	11.2426	11.492	ATXN7L3B	ATXN7L3B	A7L3B_HUMAN	Q96GX2	Q96GX2	Ataxin-7-like protein 3B	NA	NA	NA	NA	3	3	3	4	4	3	3	3	3	3	4	1	2	2	2	2	1	2
		14.6945	14.7962	14.7738	14.749	14.6305	14.6359	14.6548	14.6917	14.741	14.8646	14.6131	14.8069	14.7236	14.74	14.7165	14.7913	14.6867	14.7936	14.8792	14.7968	AAAS	AAAS	AAAS_HUMAN	Q9NRG9	Q9NRG9	Aladin	SASP	NA	down	NA	20	20	17	18	19	17	18	19	17	19	20	15	17	16	16	16	17	14
		15.5125	15.6834	15.5076	15.6999	15.7445	15.6294	15.6035	15.5617	15.6619	15.8388	15.5317	15.6371	15.7628	15.5356	15.5785	15.5989	15.5502	15.4915	15.4718	15.3875	SLC1A5	SLC1A5	AAAT_HUMAN	Q15758	Q15758	Neutral amino acid transporter B(0)	SASP	NA	up	NA	13	14	10	12	15	16	14	14	16	16	13	15	15	13	14	15	15	15
		14.0468	14.3243	14.2677	14.2812	14.2402	14.0179	14.1373	14.204	14.1273	14.1693	13.4755	13.5695	13.5495	13.444	13.211	13.6875	13.3785	13.3766	13.3476	13.6063	AACS	AACS	AACS_HUMAN	Q86V21	Q86V21	Acetoacetyl-CoA synthetase	NA	NA	NA	NA	17	17	16	16	16	17	15	17	16	16	15	14	15	13	13	14	16	15
		13.2793	13.2049	13.1332	13.1047	13.2118	13.1918	13.3301	13.228	13.3984	13.3494	13.1602	13.1811	13.2759	13.2552	13.3428	13.2763	13.1753	13.1261	13.1921	13.2391	AAGAB	AAGAB	AAGAB_HUMAN	Q6PD74	Q6PD74	Alpha- and gamma-adaptin-binding protein p34	NA	NA	NA	NA	5	5	5	5	5	5	5	5	4	5	3	4	4	4	5	4	3	4
		16.1745	15.9207	15.7032	15.7439	15.9271	16.1153	15.975	15.8308	16.0274	15.9563	16.0795	15.9571	16.0172	16.0006	16.0134	15.9354	15.9073	15.9616	15.974	15.9729	AAK1	AAK1	AAK1_HUMAN	Q2M2I8	Q2M2I8	AP2-associated protein kinase 1	NA	NA	NA	NA	30	31	29	29	29	31	31	27	27	30	29	28	30	30	30	28	30	31
		13.5999	13.8533	14.0443	14.1927	14.0605	13.6979	13.3472	13.7179	13.4475	13.4466	13.2697	13.3631	13.0184	9.6733	12.9958	13.2839	12.829	12.892	12.6726	13.1362	AAK1.1	AAK1;BMP2K	AAK1_HUMAN;BMP2K_HUMAN	Q2M2I8;Q9NSY1	Q2M2I8;Q9NSY1	AP2-associated protein kinase 1	NA	NA	NA	NA	1	1	1	1	1	1	1	1	1	1	1	1	1	0	1	1	1	1
		14.9799	14.8829	14.9856	14.8364	15.1359	15.1951	15.1581	15.1308	15.0755	15.0698	15.4951	15.4899	15.4644	15.5101	15.4511	15.3881	15.3468	15.3523	15.3325	15.2983	PRKAB1.1	PRKAB1	AAKB1_HUMAN	Q9Y478	Q9Y478	5'-AMP-activated protein kinase subunit beta-1	NA	NA	NA	NA	13	12	15	14	14	13	13	13	16	16	16	15	14	15	13	15	14	16
		11.1346	11.2028	12.065	11.7723	11.1683	11.5623	11.1518	11.1608	11.6374	11.5451	10.904	11.3099	10.6441	10.9684	10.7016	10.6337	9.81744	10.4922	10.6785	10.6755	PRKAB1	PRKAB1;PRKAB2	AAKB1_HUMAN;AAKB2_HUMAN	O43741;Q9Y478	Q9Y478;O43741	5'-AMP-activated protein kinase subunit beta-2	NA	NA	NA	NA	2	2	2	2	2	2	2	2	2	2	2	2	2	2	2	2	2	2
		13.8174	13.6848	13.5622	13.734	13.9223	13.8529	13.911	13.6769	13.9158	13.9154	14.2434	14.3379	14.3102	14.3017	14.3672	14.309	14.2074	14.1567	14.3754	14.3089	PRKAB2	PRKAB2	AAKB2_HUMAN	O43741	O43741	5'-AMP-activated protein kinase subunit beta-2	NA	NA	NA	NA	13	13	14	12	11	14	13	11	14	12	12	12	13	12	13	12	11	12
		15.0011	15.0913	15.0628	15.1025	15.016	15.0334	14.9385	14.9752	14.9782	15.0144	15.0717	15.2786	15.1251	15.2059	15.161	15.1608	15.0849	14.9779	15.0998	15.1575	PRKAG1	PRKAG1	AAKG1_HUMAN	P54619	P54619	5'-AMP-activated protein kinase subunit gamma-1	NA	NA	NA	NA	20	18	19	20	20	21	22	20	20	20	18	20	20	20	18	21	19	20
		15.108	15.5709	15.7435	16.0008	15.6807	15.7928	15.3713	15.7086	15.9163	15.8242	15.4285	15.4195	15.5078	15.1782	15.1244	15.5367	14.769	14.8485	15.1304	15.1385	PRKAG1.1	PRKAG1;PRKAG2	AAKG1_HUMAN;AAKG2_HUMAN	P54619;Q9UGJ0	P54619;Q9UGJ0	5'-AMP-activated protein kinase subunit gamma-1	SASP	NA	up	NA	1	1	1	1	1	1	1	1	1	1	1	1	1	1	1	1	1	1
		12.6679	12.5863	12.5453	12.6857	12.6185	12.4454	12.5891	12.4748	12.6251	12.6962	12.4951	12.7683	12.7834	12.6139	12.6383	12.4382	12.5649	12.5742	12.398	12.6221	PRKAG2	PRKAG2	AAKG2_HUMAN	Q9UGJ0	Q9UGJ0	5'-AMP-activated protein kinase subunit gamma-2	SASP	NA	up	NA	6	9	8	7	9	8	9	9	9	10	8	9	7	9	7	7	6	8
		15.4359	15.8135	15.6918	15.6398	15.4982	15.6751	15.6392	15.5028	15.6094	15.7161	15.7524	15.534	15.2593	15.4419	15.3644	15.5322	15.4475	15.5331	14.9403	15.4202	AAMDC	AAMDC	AAMDC_HUMAN	Q9H7C9	Q9H7C9	Mth938 domain-containing protein	SASP	NA	up	NA	8	8	8	8	8	7	7	7	8	8	7	7	8	8	6	7	7	6
		15.3146	15.4824	15.347	15.5489	15.468	15.4407	15.5407	15.5967	15.4789	15.5481	15.4622	15.4734	15.4367	15.3551	15.2405	15.6096	15.4294	15.3972	15.4576	15.3977	AAMP	AAMP	AAMP_HUMAN	Q13685	Q13685	Angio-associated migratory cell protein	NA	NA	NA	NA	9	9	9	9	9	9	9	9	9	9	8	8	9	9	8	9	8	9
		16.811	16.6026	16.6533	16.6764	16.7275	16.7253	16.7902	16.8639	16.7203	16.7699	17.0929	17.1598	17.111	17.0555	17.0943	17.0077	17.0269	17.0609	17.0032	17.0764	PRKAA1.1	PRKAA1	AAPK1_HUMAN	Q13131	Q13131	5'-AMP-activated protein kinase catalytic subunit alpha-1	NA	NA	NA	NA	22	24	21	25	24	24	23	23	24	25	25	24	24	26	25	25	23	25
		14.5704	14.7629	14.2867	14.4732	14.7666	14.7133	14.8517	14.5809	14.4334	14.8208	15.1695	15.1102	15.1707	15.0917	15.1507	15.0568	15.1068	15.0666	15.2095	15.2108	PRKAA1	PRKAA1;PRKAA2	AAPK1_HUMAN;AAPK2_HUMAN	P54646;Q13131	Q13131;P54646	5'-AMP-activated protein kinase catalytic subunit alpha-2	NA	NA	NA	NA	5	6	7	6	7	7	6	6	7	6	6	6	7	6	6	6	6	7
		11.8395	11.7794	11.9277	11.9713	12.0308	11.9682	12.0697	11.9523	11.6321	11.9629	12.0672	11.7642	11.5945	11.7078	12.0009	11.7276	11.65	11.5406	11.4867	11.5154	PRKAA2	PRKAA2	AAPK2_HUMAN	P54646	P54646	5'-AMP-activated protein kinase catalytic subunit alpha-2	NA	NA	NA	NA	2	3	3	2	2	2	2	3	3	3	3	2	3	2	2	3	3	3
		12.6061	12.9598	12.9981	12.7192	12.7542	12.8858	12.8544	12.9047	12.7472	12.8509	12.9095	12.9448	12.9199	13.0376	12.9914	12.9468	12.9024	12.9121	12.7241	12.9093	AAR2	AAR2	AAR2_HUMAN	Q9Y312	Q9Y312	Protein AAR2 homolog	NA	NA	NA	NA	13	14	13	14	13	15	15	15	15	14	13	15	15	13	13	14	15	15
		14.4769	14.4544	14.519	14.4304	14.3895	14.4275	14.4271	14.4431	14.4036	14.4017	14.1831	14.2645	14.2052	14.2071	14.1781	14.2211	14.2347	14.2109	14.0987	14.2669	AARSD1	AARSD1	AASD1_HUMAN	Q9BTE6	Q9BTE6	Alanyl-tRNA editing protein Aarsd1	NA	NA	NA	NA	16	18	17	17	17	17	17	17	18	17	15	16	16	14	15	16	16	16
		13.6158	13.4511	13.4066	13.4333	13.5117	13.685	13.6902	13.6113	13.6106	13.5896	13.3862	13.3679	13.2602	13.3439	13.2996	13.3199	13.3977	13.2902	13.2355	13.3267	AASS	AASS	AASS_HUMAN	Q9UDR5	Q9UDR5	Alpha-aminoadipic semialdehyde synthase, mitochondrial	NA	NA	NA	NA	20	22	23	23	23	25	22	24	23	24	19	19	20	18	17	20	20	20
		17.1415	17.1755	17.1431	17.2083	17.1955	17.1291	17.1598	17.2266	17.2521	17.2244	17.0229	17.2194	17.051	17.0701	16.9633	17.0946	17.0571	17.0935	16.9816	17.005	GOT1	GOT1	AATC_HUMAN	P17174	P17174	Aspartate aminotransferase, cytoplasmic	SASP	NA	altered	NA	29	32	33	33	33	34	33	34	34	35	35	34	32	32	31	31	32	33
		12.8415	12.9102	12.8304	12.8157	12.9421	12.9471	13.0557	12.9954	12.9549	13.003	13.1185	13.0747	13.1232	13.2035	12.9566	13.07	13.0185	13.0306	12.9771	12.868	AATF	AATF	AATF_HUMAN	Q9NY61	Q9NY61	Protein AATF	NA	NA	NA	NA	19	18	18	17	16	17	18	18	18	18	16	15	16	15	16	13	16	15
		17.3379	17.4329	17.4501	17.5066	17.3533	17.3888	17.4766	17.5036	17.5081	17.5229	17.3129	17.3659	17.29	17.302	17.2109	17.3488	17.4572	17.3482	17.2727	17.334	GOT2	GOT2	AATM_HUMAN	P00505	P00505	Aspartate aminotransferase, mitochondrial	NA	NA	NA	NA	32	33	32	33	34	33	31	32	33	31	32	32	32	31	31	29	32	31
		14.0289	14.0355	14.1457	14.0546	13.9798	14.2186	14.1209	13.9535	14.143	13.9255	13.952	13.9613	14.0079	14.0751	14.0785	14.0762	13.8872	14.0303	14.0481	14.1851	APBB1IP.1	APBB1IP	AB1IP_HUMAN	Q7Z5R6	Q7Z5R6	Amyloid beta A4 precursor protein-binding family B member 1-interacting protein	NA	NA	NA	NA	13	13	12	12	13	14	14	15	13	14	14	13	13	12	13	13	11	13
		9.6275	11.735	12.3478	12.5949	11.517	11.0786	11.6137	11.994	11.556	11.5009	10.8451	10.6558	10.9028	9.55442	8.99155	11.6109	10.659	9.84623	10.1618	9.96249	APBB1IP	APBB1IP;RAPH1	AB1IP_HUMAN;RAPH1_HUMAN	Q70E73;Q7Z5R6	Q7Z5R6;Q70E73	Ras-associated and pleckstrin homology domains-containing protein 1	NA	NA	NA	NA	0	1	1	1	1	1	1	1	1	1	1	1	1	1	0	1	1	1
		12.1702	12.2056	12.3548	12.1217	11.7203	11.8806	12.0288	11.8041	11.768	11.9884	12.0092	12.051	11.6798	11.899	11.8294	11.8829	11.9761	12.1301	12.1516	11.9839	APOBEC3B.1	APOBEC3B	ABC3B_HUMAN	Q9UH17	Q9UH17	DNA dC->dU-editing enzyme APOBEC-3B	NA	NA	NA	NA	4	4	3	4	3	4	4	4	3	4	2	3	3	4	2	3	3	4
		11.7409	12.3408	12.2243	12.6282	12.2237	12.5704	12.167	12.4843	12.3158	12.4128	10.4497	11.9696	11.5277	9.72121	9.90665	11.5504	8.75133	10.574	10.6314	9.21193	APOBEC3B	APOBEC3B;APOBEC3F	ABC3B_HUMAN;ABC3F_HUMAN	Q8IUX4;Q9UH17	Q9UH17;Q8IUX4	DNA dC->dU-editing enzyme APOBEC-3F	NA	NA	NA	NA	1	1	1	1	1	1	1	1	1	1	0	1	1	0	0	1	0	0
		15.2011	15.4177	15.3993	15.1001	15.4083	15.43	15.2781	14.9722	15.2778	15.2604	15.4738	15.3215	15.4243	15.3781	15.5889	15.1494	15.0478	15.3967	15.364	15.3893	APOBEC3C.1	APOBEC3C	ABC3C_HUMAN	Q9NRW3	Q9NRW3	DNA dC->dU-editing enzyme APOBEC-3C	NA	NA	NA	NA	6	7	7	7	8	8	7	7	8	7	7	8	8	8	6	7	7	7
		14.0695	14.1158	14.0573	13.9036	13.9964	14.1853	14.183	14.3627	14.361	14.2538	14.4214	14.6304	14.4948	14.4926	14.4709	14.5353	14.5625	14.5376	14.3894	14.4528	APOBEC3C	APOBEC3C;APOBEC3D;APOBEC3F	ABC3C_HUMAN;ABC3D_HUMAN;ABC3F_HUMAN	Q8IUX4;Q96AK3;Q9NRW3	Q9NRW3;Q96AK3;Q8IUX4	DNA dC->dU-editing enzyme APOBEC-3F	NA	NA	NA	NA	1	1	1	1	1	1	1	1	1	1	1	1	1	1	1	1	1	1
		10.6185	10.4384	9.94508	9.84233	10.2797	10.1577	9.46746	10.5515	10.0011	10.7065	10.8621	11.3542	9.40558	10.3174	10.1824	10.7188	10.158	10.6757	10.0391	10.5181	APOBEC3D.1	APOBEC3D	ABC3D_HUMAN	Q96AK3	Q96AK3	DNA dC->dU-editing enzyme APOBEC-3D	NA	NA	NA	NA	1	1	1	1	0	1	0	1	0	1	1	1	1	1	1	1	1	1
		11.9255	11.2642	10.4614	10.7043	11.2387	11.5198	11.2281	11.2922	11.5704	11.2493	11.284	11.816	11.4181	11.2237	11.5225	11.2957	11.6215	11.4614	10.5455	10.9816	APOBEC3D	APOBEC3D;APOBEC3F	ABC3D_HUMAN;ABC3F_HUMAN	Q8IUX4;Q96AK3	Q96AK3;Q8IUX4	DNA dC->dU-editing enzyme APOBEC-3F	NA	NA	NA	NA	2	2	1	2	1	2	2	2	2	2	2	2	2	2	2	2	2	2
		12.4875	12.4051	12.391	12.4683	12.467	12.4608	12.6689	12.6482	12.432	12.5913	12.5808	12.5046	12.3901	12.5717	12.4936	12.4611	12.36	12.213	12.2892	12.3905	APOBEC3F	APOBEC3F	ABC3F_HUMAN	Q8IUX4	Q8IUX4	DNA dC->dU-editing enzyme APOBEC-3F	NA	NA	NA	NA	5	5	5	5	5	5	5	5	5	5	5	5	4	5	5	5	5	5
		12.9207	12.674	12.537	12.54	12.2943	12.127	12.9469	13.0173	12.7841	12.8009	12.6189	12.8535	12.607	12.8954	12.6476	12.8223	12.7271	12.8136	12.9079	12.9643	APOBEC3F.1	APOBEC3F;APOBEC3G	ABC3F_HUMAN;ABC3G_HUMAN	Q8IUX4;Q9HC16	Q8IUX4;Q9HC16	DNA dC->dU-editing enzyme APOBEC-3F	NA	NA	NA	NA	1	1	1	1	1	1	1	1	1	1	1	1	1	1	1	1	1	1
		12.2728	12.2447	12.5389	12.2414	12.2433	12.3145	12.3705	12.5188	12.3695	12.3274	12.2099	12.4504	11.957	12.1674	12.0333	12.2555	12.1964	12.1951	12.0852	12.1067	APOBEC3G	APOBEC3G	ABC3G_HUMAN	Q9HC16	Q9HC16	DNA dC->dU-editing enzyme APOBEC-3G	NA	NA	NA	NA	8	6	8	8	9	8	6	9	8	7	7	7	6	7	6	9	6	6
		14.1247	14.1191	14.1111	14.1734	14.2265	13.992	13.834	13.9857	14.11	13.7554	14.4126	14.372	14.567	14.4588	14.3951	14.4533	14.1477	14.2093	14.1471	14.339	ABCA1	ABCA1	ABCA1_HUMAN	O95477	O95477	Phospholipid-transporting ATPase ABCA1	NA	NA	NA	NA	18	19	23	21	21	19	19	22	22	19	19	21	20	20	21	23	20	19
		11.2398	10.3925	10.5773	10.7552	11.123	11.1525	10.8636	10.2616	10.7982	10.7881	11.0618	11.1406	11.1946	9.72632	11.4577	11.2257	9.30853	10.8976	9.72766	9.98633	ABCA1.1	ABCA1;ABCA2	ABCA1_HUMAN;ABCA2_HUMAN	O95477;Q9BZC7	O95477;Q9BZC7	Phospholipid-transporting ATPase ABCA1	NA	NA	NA	NA	1	1	1	1	1	1	1	1	1	1	1	1	1	0	1	1	0	1
		10.3469	10.9442	10.3918	11.0078	10.8049	10.7837	10.5721	10.8084	11.291	10.8198	10.4396	9.84876	10.6218	10.5424	10.8868	11.0239	11.0653	11.0775	10.3759	10.5897	ABCA2	ABCA2	ABCA2_HUMAN	Q9BZC7	Q9BZC7	ATP-binding cassette sub-family A member 2	NA	NA	NA	NA	2	2	3	2	3	2	2	2	2	2	3	2	3	3	3	2	3	1
		12.0959	11.7839	11.5491	11.7073	11.9436	12.0321	12.2538	12.2907	11.8505	12.163	11.9431	11.7969	12.0311	12.1336	12.1126	12.2886	12.2655	12.3131	12.433	12.1876	ABCA6	ABCA6	ABCA6_HUMAN	Q8N139	Q8N139	ATP-binding cassette sub-family A member 6	NA	NA	NA	NA	7	6	7	6	6	7	7	7	6	7	5	7	5	7	5	6	6	6
		12.7274	12.6479	12.515	12.5742	12.8048	12.922	12.8663	12.9061	12.8424	12.9452	12.8608	12.8688	12.955	12.7844	12.9125	13.0199	12.9911	12.8449	12.9276	13.1623	ABCA8	ABCA8	ABCA8_HUMAN	O94911	O94911	ABC-type organic anion transporter ABCA8	NA	NA	NA	NA	19	19	19	18	20	21	21	22	20	22	20	19	20	22	20	22	20	20
		12.3717	12.228	12.7353	12.1728	12.869	12.819	12.7787	12.9328	12.8519	13.1173	13.4309	13.0064	13.6755	13.4158	13.5723	13.5375	13.6845	13.5856	13.456	13.7384	ABCA8.1	ABCA8;ABCA9	ABCA8_HUMAN;ABCA9_HUMAN	O94911;Q8IUA7	O94911;Q8IUA7	ABC-type organic anion transporter ABCA8	NA	NA	NA	NA	1	1	1	1	1	1	1	1	1	1	1	1	1	1	1	1	1	1
		10.3774	10.0059	10.5233	10.4793	10.4035	10.493	10.7704	10.2023	9.89734	10.358	10.0379	9.83232	10.2192	10.0776	9.66341	9.70918	10.0839	9.74909	10.1319	10.5792	ABCA9	ABCA9	ABCA9_HUMAN	Q8IUA7	Q8IUA7	ATP-binding cassette sub-family A member 9	NA	NA	NA	NA	2	3	2	3	2	4	3	4	4	4	2	4	3	2	2	3	4	3
		14.6348	14.574	14.7172	14.6704	14.6909	14.67	14.7168	14.7431	14.678	14.8116	15.1389	15.0627	15.006	15.1035	15.1295	15.0928	15.0613	15.0096	15.2141	15.1269	ABCB6	ABCB6	ABCB6_HUMAN	Q9NP58	Q9NP58	ATP-binding cassette sub-family B member 6, mitochondrial	NA	NA	NA	NA	15	16	16	14	14	14	17	16	17	19	18	18	19	16	16	17	17	17
		14.2953	14.3054	14.1921	14.3853	14.2933	14.2991	14.2875	14.3703	14.3207	14.355	14.2248	14.1883	14.178	14.097	13.9607	14.1861	14.1482	14.0476	14.0838	14.1306	ABCB7	ABCB7	ABCB7_HUMAN	O75027	O75027	ATP-binding cassette sub-family B member 7, mitochondrial	NA	NA	NA	NA	11	15	15	12	13	13	15	15	14	15	12	11	13	13	10	13	11	10
		13.4444	13.5669	13.5788	13.5932	13.5829	13.5956	13.6613	13.6032	13.5858	13.7352	13.3883	13.5385	13.5257	13.5854	13.3091	13.4946	13.4156	13.4249	13.3296	13.5225	ABCB10.1	ABCB10	ABCBA_HUMAN	Q9NRK6	Q9NRK6	ATP-binding cassette sub-family B member 10, mitochondrial	NA	NA	NA	NA	13	15	14	13	14	14	14	13	14	15	12	14	13	11	9	14	13	15
		15.3259	15.2514	15.0908	15.0697	15.2455	15.2162	15.3355	15.3462	15.3693	15.3402	15.1819	15.3551	15.3109	15.4065	15.3279	15.3061	15.2689	15.4249	15.4306	15.3062	ABCB10	ABCB10;ABCB8;TAP2	ABCBA_HUMAN;MITOS_HUMAN;TAP2_HUMAN	Q03519;Q9NRK6;Q9NUT2	Q9NRK6;Q9NUT2;Q03519	Antigen peptide transporter 2	NA	NA	NA	NA	1	1	1	1	1	1	1	1	1	1	1	1	1	1	1	1	1	1
		12.1218	11.8764	11.8492	11.5578	12.1754	12.1635	12.4056	12.0835	12.082	12.0607	12.1193	12.1951	12.087	12.17	12.0643	12.0969	12.0303	12.2468	11.9044	12.1066	ABCC9	ABCC9	ABCC9_HUMAN	O60706	O60706	ATP-binding cassette sub-family C member 9	NA	NA	NA	NA	4	4	6	4	3	4	5	6	6	7	5	5	7	6	5	6	6	5
		12.054	12.1748	12.9177	12.6758	12.4907	12.3145	11.883	12.2704	11.8973	11.7415	12.0087	11.7513	11.6893	11.5571	11.5603	11.3527	11.3151	11.2796	11.4202	11.7955	ABCC3.1	ABCC3;ABCC9	ABCC9_HUMAN;MRP3_HUMAN	O15438;O60706	Q09428;O60706;O15438	ATP-binding cassette sub-family C member 3	NA	NA	NA	NA	1	1	1	1	1	1	1	1	1	1	1	1	1	1	1	1	1	1
		13.8898	13.8277	14.035	13.9967	13.886	13.9465	13.9541	14.0554	14.0265	13.9476	14.0172	14.2423	14.0652	14.0174	14.1156	14.0542	14.0086	14.0007	14.0368	14.0583	ABCD1	ABCD1	ABCD1_HUMAN	P33897	P33897	ATP-binding cassette sub-family D member 1	NA	NA	NA	NA	20	23	20	22	21	23	20	23	21	19	19	20	20	21	20	21	19	20
		15.6607	15.69	15.4679	15.5929	15.6332	15.6064	15.707	15.7752	15.6837	15.7053	15.6742	15.7252	15.7379	15.7611	15.6596	15.6921	15.7322	15.6474	15.6642	15.7125	ABCD3	ABCD3	ABCD3_HUMAN	P28288	P28288	ATP-binding cassette sub-family D member 3	NA	NA	NA	NA	35	35	35	37	34	36	35	36	36	34	32	34	33	33	32	35	33	34
		10.6968	10.8658	10.4487	10.1614	10.1377	10.5799	9.56728	10.5943	10.5492	10.2643	10.0447	10.4741	10.4134	10.4561	10.3751	10.2186	10.7046	10.4355	10.3549	10.1132	ABCD4	ABCD4	ABCD4_HUMAN	O14678	O14678	Lysosomal cobalamin transporter ABCD4	NA	NA	NA	NA	2	2	2	2	2	2	2	2	2	2	2	1	1	2	2	2	1	2
		16.9263	16.9862	16.9854	17.0071	16.9352	16.8732	16.8637	16.9414	16.9241	17.0124	17.026	17.0398	17.0226	16.9527	16.8905	16.9514	16.974	16.8428	16.8564	16.861	ABCE1	ABCE1	ABCE1_HUMAN	P61221	P61221	ATP-binding cassette sub-family E member 1	NA	NA	NA	NA	38	38	37	40	36	39	37	36	39	38	37	37	38	38	39	41	38	40
		16.524	16.4686	16.4791	16.413	16.5049	16.4949	16.477	16.5228	16.5051	16.61	16.5204	16.5484	16.5245	16.5008	16.4651	16.5052	16.4642	16.4354	16.3813	16.4115	ABCF1	ABCF1	ABCF1_HUMAN	Q8NE71	Q8NE71	ATP-binding cassette sub-family F member 1	SASP	NA	up	NA	53	55	53	53	50	54	53	54	54	56	54	54	55	56	53	52	56	57
		15.8866	15.7818	15.7811	15.7237	15.7677	15.7392	15.8395	15.7087	15.8154	15.8845	15.8721	15.8424	15.8012	15.7959	15.7804	15.8242	15.8213	15.7836	15.757	15.8568	ABCF2	ABCF2	ABCF2_HUMAN	Q9UG63	Q9UG63	ATP-binding cassette sub-family F member 2	NA	NA	NA	NA	43	44	44	42	41	43	43	44	42	43	42	42	40	43	36	38	40	41
		15.457	15.4935	15.4556	15.5787	15.5396	15.5072	15.5405	15.537	15.5194	15.5456	15.5505	15.6756	15.632	15.5779	15.5722	15.6942	15.5343	15.5601	15.4752	15.6205	ABCF3	ABCF3	ABCF3_HUMAN	Q9NUQ8	Q9NUQ8	ATP-binding cassette sub-family F member 3	NA	NA	NA	NA	29	29	29	30	30	31	31	29	28	30	27	29	30	30	27	27	28	28
		12.566	10.0539	10.7855	11.7195	10.9641	10.6421	11.4229	11.578	11.3546	9.36916	10.1238	10.6124	10.2507	13.8887	11.3598	9.77742	12.9739	11.3265	11.1127	9.74711	ABCG2	ABCG2	ABCG2_HUMAN	Q9UNQ0	Q9UNQ0	Broad substrate specificity ATP-binding cassette transporter ABCG2	NA	NA	NA	NA	1	0	1	2	1	1	1	1	1	0	0	0	1	1	1	1	1	1
		14.8578	14.8614	14.7968	14.7735	14.8896	14.8512	14.8802	14.9262	14.8946	14.7785	14.7583	14.8508	14.7528	14.8563	14.7903	14.7742	14.8751	14.7966	14.7396	14.7777	ABHD12	ABHD12	ABD12_HUMAN	Q8N2K0	Q8N2K0	Lysophosphatidylserine lipase ABHD12	NA	NA	NA	NA	17	18	17	18	19	18	19	19	19	20	19	18	20	17	18	18	18	19
		10.4126	10.578	10.6543	10.2886	10.6429	10.2063	10.1089	10.243	10.4666	10.5054	10.2072	10.7995	9.81343	10.3918	10.7219	10.22	10.4035	10.4073	10.3372	10.5616	ABHD2	ABHD2	ABHD2_HUMAN	P08910	P08910	Monoacylglycerol lipase ABHD2	NA	NA	NA	NA	0	1	1	2	1	2	1	2	1	2	0	1	1	1	1	2	1	0
		13.5245	13.4332	13.7003	13.681	13.5098	13.8453	13.7578	13.7215	13.6756	13.5254	13.7937	13.6101	13.7694	13.6165	13.3772	13.7601	13.5189	13.3936	13.5159	13.5209	ABHD4	ABHD4	ABHD4_HUMAN	Q8TB40	Q8TB40	(Lyso)-N-acylphosphatidylethanolamine lipase	NA	NA	NA	NA	5	6	5	6	5	5	5	6	5	5	4	3	5	5	5	4	5	5
		12.3871	12.2157	12.1115	12.1759	12.3365	12.2782	12.5556	12.3237	12.0677	12.3186	12.5123	12.5345	12.3271	12.4283	12.5241	12.739	12.4909	12.5678	12.337	12.0908	ABHD5	ABHD5	ABHD5_HUMAN	Q8WTS1	Q8WTS1	1-acylglycerol-3-phosphate O-acyltransferase ABHD5	NA	NA	NA	NA	6	6	6	5	6	6	4	5	4	6	4	6	5	4	4	5	5	4
		12.1383	11.9034	11.9232	11.9893	11.8814	11.8835	12.0428	12.0575	11.5594	12.0397	12.3369	12.2882	12.4167	12.1243	12.1911	12.4493	12.1034	11.8403	12.1555	12.026	ABHD6	ABHD6	ABHD6_HUMAN	Q9BV23	Q9BV23	Monoacylglycerol lipase ABHD6	NA	NA	NA	NA	4	5	4	3	4	6	6	5	5	6	6	7	5	5	5	6	6	6
		15.6304	15.6235	15.5281	15.6269	15.5226	15.6087	15.6122	15.7299	15.7534	15.761	15.5613	15.6351	15.4721	15.5789	15.5241	15.5556	15.5923	15.5239	15.5749	15.6004	ABHD10	ABHD10	ABHDA_HUMAN	Q9NUJ1	Q9NUJ1	Palmitoyl-protein thioesterase ABHD10, mitochondrial	NA	NA	NA	NA	20	23	23	22	25	24	22	24	25	23	22	23	24	25	22	22	23	23
		13.4902	13.5258	13.6017	13.5561	13.388	13.609	13.4904	13.6667	13.5166	13.5103	13.3003	13.4596	13.3785	13.2786	13.3682	13.5374	13.4614	13.5344	13.3359	13.5315	ABHD11	ABHD11	ABHDB_HUMAN	Q8NFV4	Q8NFV4	Protein ABHD11	NA	NA	NA	NA	10	10	10	11	11	11	10	11	11	11	11	10	10	10	11	9	10	11
		13.3291	13.0246	12.9332	12.5866	12.8789	13.2899	13.081	12.8493	12.9433	12.9597	13.2283	13.5004	13.2342	13.2344	13.618	13.2109	13.3075	13.3053	13.0894	13.2512	ABHD13	ABHD13	ABHDD_HUMAN	Q7L211	Q7L211	Protein ABHD13	NA	NA	NA	NA	4	3	5	4	4	5	4	3	5	4	4	3	6	4	4	5	5	5
		11.614	11.7462	12.3017	12.0488	11.9176	11.2121	11.6368	11.4985	11.6833	11.757	11.9689	12.0068	12.2087	11.8574	12.1311	11.661	11.8304	11.7646	11.8327	12.1174	ABHD14A	ABHD14A	ABHEA_HUMAN	Q9BUJ0	Q9BUJ0	Protein ABHD14A	NA	NA	NA	NA	3	3	3	3	3	3	3	2	3	1	2	3	2	3	2	2	2	2
		16.3313	16.3959	16.2863	16.2804	16.3749	16.4308	16.4683	16.5647	16.4859	16.4709	16.6576	16.7156	16.7774	16.6376	16.6023	16.5105	16.5178	16.5502	16.5784	16.5938	ABHD14B	ABHD14B	ABHEB_HUMAN	Q96IU4	Q96IU4	Protein ABHD14B	SASP	NA	down	NA	10	10	10	10	10	10	10	10	10	10	10	10	10	10	10	10	10	10
		14.3556	14.3353	14.2801	14.2866	14.1815	14.3089	14.3283	14.3035	14.3994	14.3893	14.4541	14.5116	14.39	14.2854	14.3874	14.4067	14.4059	14.3481	14.378	14.4591	ABHD16A	ABHD16A	ABHGA_HUMAN	O95870	O95870	Phosphatidylserine lipase ABHD16A	NA	NA	NA	NA	19	20	22	20	22	22	21	22	21	21	21	21	21	20	22	22	22	22
		16.5396	16.277	16.0004	16.4429	16.3758	16.3763	16.2774	16.113	16.3311	16.4852	16.452	16.2285	16.3986	16.4204	16.4373	16.506	16.223	16.5797	16.2245	16.3066	ABI1	ABI1	ABI1_HUMAN	Q8IZP0	Q8IZP0	Abl interactor 1	NA	NA	NA	NA	16	17	15	15	16	17	16	16	17	17	16	16	17	17	17	17	17	17
		14.8975	14.7053	14.5795	14.5687	14.6199	14.8298	14.68	14.6791	14.6492	14.9362	14.7312	14.8343	14.7742	14.8321	14.71	14.9482	14.7912	14.9088	14.624	15.0731	ABI1.1	ABI1;ABI2	ABI1_HUMAN;ABI2_HUMAN	Q8IZP0;Q9NYB9	Q8IZP0;Q9NYB9	Abl interactor 1	NA	NA	NA	NA	8	10	7	7	10	10	11	10	9	10	9	10	11	10	10	10	10	11
		15.1247	15.156	15.1257	15.2552	15.1899	15.2082	15.3079	14.9908	15.1945	15.0709	15.0749	15.0086	15.1804	14.9433	14.988	15.1382	14.8899	14.9943	14.8938	14.9663	ABI2	ABI2	ABI2_HUMAN	Q9NYB9	Q9NYB9	Abl interactor 2	NA	NA	NA	NA	7	7	8	8	8	7	8	7	8	7	8	7	7	8	7	7	8	8
		12.0802	11.7176	11.0967	11.4089	11.1269	11.1872	11.5687	10.9669	11.4211	11.4488	12.1496	12.0968	11.6799	11.8896	11.7404	11.8606	12.1011	11.5673	11.358	11.2727	ABITRAM	ABITRAM	ABITM_HUMAN	Q9NX38	Q9NX38	Protein Abitram	NA	NA	NA	NA	2	2	2	2	2	2	2	2	2	2	2	2	2	2	2	2	2	2
		14.0936	13.725	13.6151	13.6312	13.8819	14.0011	14.0794	13.8428	13.8742	13.731	14.0058	13.9947	14.1115	14.0482	13.9238	14.0946	14.0552	13.9867	14.0923	14.0522	ABL1	ABL1	ABL1_HUMAN	P00519	P00519	Tyrosine-protein kinase ABL1	NA	NA	NA	NA	16	19	14	15	16	16	16	17	17	15	17	17	17	17	18	16	17	17
		13.1395	13.1572	13.084	13.1024	13.2177	13.2011	13.1309	13.1427	13.2328	13.1386	12.8569	13.0599	13.2423	12.8869	12.9338	13.0866	13.0609	12.9174	12.9764	13.0017	ABL1.1	ABL1;ABL2	ABL1_HUMAN;ABL2_HUMAN	P00519;P42684	P00519;P42684	Tyrosine-protein kinase ABL1	NA	NA	NA	NA	8	8	8	8	8	7	8	8	8	8	7	8	8	7	7	6	7	7
		12.3517	12.5133	12.275	12.4237	12.4406	12.348	12.4937	12.6371	12.5718	12.6454	12.1799	12.5517	12.43	12.3579	12.4585	12.711	12.2009	12.4537	12.246	12.6164	ABL2	ABL2	ABL2_HUMAN	P42684	P42684	Tyrosine-protein kinase ABL2	NA	NA	NA	NA	3	4	4	3	2	3	4	4	3	4	3	2	4	4	3	3	3	2
		13.7513	13.6611	13.5942	13.7236	13.6022	13.7291	13.6605	13.7524	13.726	13.5564	13.4258	13.4939	13.5772	13.6696	13.4688	13.6161	13.6037	13.5305	13.4436	13.6298	ABLIM1	ABLIM1	ABLM1_HUMAN	O14639	O14639	Actin-binding LIM protein 1	NA	NA	NA	NA	19	18	18	18	18	18	18	18	18	19	19	17	18	18	16	17	18	19
		13.3334	13.3796	13.252	13.2946	13.2675	13.2103	13.2435	13.1784	13.2076	13.151	13.3408	13.2109	13.3623	13.2266	13.3181	13.3563	13.2774	13.1521	13.2462	13.4205	ABLIM3	ABLIM3	ABLM3_HUMAN	O94929	O94929	Actin-binding LIM protein 3	NA	NA	NA	NA	9	14	13	14	13	12	12	12	11	12	13	13	13	12	13	13	13	12
		14.1883	14.0678	14.0339	14.0301	14.0769	14.0861	14.1725	14.0904	13.9872	14.0731	14.032	14.0567	14.0976	14.0677	14.0755	14.0356	14.1733	14.1379	14.106	14.158	ABR.1	ABR	ABR_HUMAN	Q12979	Q12979	Active breakpoint cluster region-related protein	SASP	NA	up	NA	25	28	27	28	27	27	29	28	28	26	25	26	28	26	27	25	25	24
		14.8309	15.3335	15.0277	15.2522	15.147	15.1228	15.2388	15.1924	15.1395	15.2501	15.4066	15.3469	15.3401	15.1228	14.8655	15.0394	14.7482	14.9395	14.9751	14.856	ABR	ABR;BCR	ABR_HUMAN;BCR_HUMAN	P11274;Q12979	Q12979;P11274	Breakpoint cluster region protein	SASP	NA	up	NA	2	2	2	2	2	2	2	2	2	2	2	2	2	2	2	2	2	2
		14.0237	13.6218	13.2724	13.3717	13.399	13.6818	13.7245	14.0459	14.1202	13.7187	14.3567	14.4141	14.4127	14.681	14.8489	14.3137	14.826	15.0069	15.0394	14.8568	ABRACL	ABRACL	ABRAL_HUMAN	Q9P1F3	Q9P1F3	Costars family protein ABRACL	NA	NA	NA	NA	4	3	3	3	3	3	3	3	2	4	4	3	3	4	4	3	3	3
		10.9349	10.8258	10.6356	10.9171	11.3931	11.0184	11.1794	11.2998	10.8788	10.9647	11.2267	11.2566	10.9962	10.758	11.2765	11.0462	11.2371	11.216	10.8373	10.8839	ABRAXAS1	ABRAXAS1	ABRX1_HUMAN	Q6UWZ7	Q6UWZ7	BRCA1-A complex subunit Abraxas 1	NA	NA	NA	NA	2	3	2	3	2	2	3	3	3	3	2	1	2	3	3	3	2	3
		15.9645	16.1297	15.9015	16.085	15.9692	16.0415	16.0826	16.0208	15.954	15.981	15.9371	15.7966	16.0065	15.8175	15.6985	16.0747	15.6545	15.7973	15.7942	15.8315	ABRAXAS2	ABRAXAS2	ABRX2_HUMAN	Q15018	Q15018	BRISC complex subunit Abraxas 2	NA	NA	NA	NA	17	16	15	17	14	17	15	16	16	17	17	15	17	17	17	17	14	17
		12.3469	12.1684	12.2009	12.1986	12.0992	12.1916	12.3418	12.2149	12.086	12.2247	12.3933	12.1223	12.3849	12.0425	12.3787	12.2689	12.0307	12.3498	12.1761	12.4921	ABT1	ABT1	ABT1_HUMAN	Q9ULW3	Q9ULW3	Activator of basal transcription 1	NA	NA	NA	NA	4	5	5	5	2	5	5	5	5	5	6	3	3	5	3	5	3	5
		11.5126	11.1606	10.7794	10.5299	11.1922	10.9735	11.3433	10.7862	10.7186	10.9686	10.8804	10.9881	10.9407	11.1982	11.3844	11.1501	11.3354	11.0737	11.3101	11.0908	ABTB1	ABTB1	ABTB1_HUMAN	Q969K4	Q969K4	Ankyrin repeat and BTB/POZ domain-containing protein 1	NA	NA	NA	NA	2	3	2	0	1	3	2	3	3	3	2	2	3	2	3	2	3	3
		11.2642	11.3774	11.3448	11.622	11.516	11.8029	11.4447	11.3864	11.6495	11.4406	12.0415	11.9201	11.5238	11.783	11.4387	11.6227	11.6874	11.654	11.5066	11.7973	ABTB2	ABTB2	ABTB2_HUMAN	Q8N961	Q8N961	Ankyrin repeat and BTB/POZ domain-containing protein 2	NA	NA	NA	NA	4	2	4	3	3	3	4	4	3	3	3	2	2	4	3	3	2	3
		15.0572	15.0903	15.0787	15.0631	15.0948	15.0284	15.0549	15.0618	14.9844	15.0724	14.764	14.758	14.7484	14.6722	14.6801	14.7848	14.6884	14.6448	14.6452	14.8372	ACACA.1	ACACA	ACACA_HUMAN	Q13085	Q13085	Acetyl-CoA carboxylase 1	NA	NA	NA	NA	62	67	62	63	61	66	65	66	62	65	61	62	59	59	51	56	56	56
		13.0133	13.3338	13.4396	13.4962	13.2506	13.0683	13.0237	13.2354	13.1695	13.3189	12.7458	12.7208	12.7341	12.8426	12.5659	12.962	12.5985	12.7671	12.7303	12.7688	ACACA	ACACA;ACACB	ACACA_HUMAN;ACACB_HUMAN	O00763;Q13085	Q13085;O00763	Acetyl-CoA carboxylase 2	NA	NA	NA	NA	9	9	9	9	9	9	9	9	9	9	8	9	9	8	8	9	8	9
		13.4823	13.4357	13.5021	13.7705	13.4719	13.4604	13.4853	13.5207	13.4347	13.4878	13.4371	13.5307	13.5214	13.4862	13.1138	13.6996	13.3812	13.4035	13.3185	13.3725	ACAD8	ACAD8	ACAD8_HUMAN	Q9UKU7	Q9UKU7	Isobutyryl-CoA dehydrogenase, mitochondrial	NA	NA	NA	NA	10	10	11	10	12	12	11	12	12	13	8	10	11	10	9	11	10	11
		15.1529	15.1478	15.0313	14.9597	15.1215	15.0382	15.1819	15.1698	15.1705	15.1554	14.9636	15.012	14.9627	14.9275	14.8677	14.9915	14.9618	14.9117	14.9896	15.011	ACAD9	ACAD9	ACAD9_HUMAN	Q9H845	Q9H845	Complex I assembly factor ACAD9, mitochondrial	NA	NA	NA	NA	42	45	45	42	43	46	46	46	45	46	43	40	45	45	42	43	42	38
		16.3726	16.8764	16.9747	16.8789	16.7528	16.7535	16.5804	16.8029	16.8787	16.7522	16.274	16.4533	16.3439	16.3692	16.1951	16.5467	16.3016	16.4065	16.3588	16.382	ACADM	ACADM	ACADM_HUMAN	P11310	P11310	Medium-chain specific acyl-CoA dehydrogenase, mitochondrial	SASP	NA	up	NA	15	17	15	18	16	17	16	17	16	18	15	14	17	14	14	16	15	17
		14.0786	14.2148	14.3668	14.3251	14.3669	14.2743	14.3552	14.3242	14.3192	14.3654	13.8085	13.9822	13.891	13.8548	13.8084	14.015	13.9446	13.9226	13.8361	13.8554	ACADS	ACADS	ACADS_HUMAN	P16219	P16219	Short-chain specific acyl-CoA dehydrogenase, mitochondrial	NA	NA	NA	NA	14	15	13	16	15	15	15	16	14	14	15	14	15	14	12	15	11	13
		17.7094	17.9543	17.9324	18.0091	17.8678	17.7956	17.7265	17.8442	17.9418	17.8847	17.7171	17.8034	17.8103	17.6817	17.6422	17.8113	17.739	17.7526	17.7457	17.8533	ACADVL	ACADVL	ACADV_HUMAN	P49748	P49748	Very long-chain specific acyl-CoA dehydrogenase, mitochondrial	SASP	NA	down	NA	44	48	48	50	49	49	48	48	48	51	50	47	45	48	46	48	47	48
		14.6312	14.5938	14.6526	14.6702	14.6252	14.6846	14.6342	14.6791	14.6644	14.6129	14.6891	14.7098	14.7375	14.6733	14.6523	14.6868	14.6149	14.6502	14.6628	14.6802	ACAP2	ACAP2	ACAP2_HUMAN	Q15057	Q15057	Arf-GAP with coiled-coil, ANK repeat and PH domain-containing protein 2	SASP	NA	up	NA	31	32	33	33	33	33	34	33	33	34	33	31	34	33	33	33	34	33
		12.5403	12.2358	12.1829	12.1056	12.3107	12.6849	12.1915	12.099	11.8023	12.456	12.6034	12.1162	12.477	12.3697	12.4416	12.2226	12.3049	12.4898	12.291	12.514	ACAP2.1	ACAP2;ACAP3	ACAP2_HUMAN;ACAP3_HUMAN	Q15057;Q96P50	Q15057;Q96P50	Arf-GAP with coiled-coil, ANK repeat and PH domain-containing protein 2	SASP	NA	up	NA	2	2	2	1	2	2	2	1	2	1	2	2	1	2	2	1	1	2
		11.1525	11.8558	11.7454	11.8903	11.625	11.7837	11.9226	11.7138	11.7574	11.3151	11.8874	11.7254	12.0402	11.5506	11.9723	11.7747	11.865	11.9837	11.8024	11.546	ACAP3	ACAP3	ACAP3_HUMAN	Q96P50	Q96P50	Arf-GAP with coiled-coil, ANK repeat and PH domain-containing protein 3	NA	NA	NA	NA	1	5	4	3	5	5	5	5	5	5	4	5	5	6	5	6	4	6
		14.9191	14.9495	14.7302	14.8279	14.8975	14.8539	14.8415	14.904	14.8259	14.9714	15.2541	15.1275	15.1438	15.0616	15.0757	15.0682	14.9839	14.8223	14.8992	14.9703	SLC33A1	SLC33A1	ACATN_HUMAN	O00400	O00400	Acetyl-coenzyme A transporter 1	SASP	NA	up	NA	10	10	8	8	9	10	10	10	10	10	10	9	10	9	8	9	9	10
		13.6928	13.6024	13.4932	13.5975	13.6608	13.6901	13.8813	13.542	13.6288	13.5811	13.7099	13.6285	13.7583	13.7152	13.59	13.7421	13.6313	13.6245	13.7041	13.6945	ACBD5	ACBD5	ACBD5_HUMAN	Q5T8D3	Q5T8D3	Acyl-CoA-binding domain-containing protein 5	NA	NA	NA	NA	16	17	18	18	18	18	17	17	17	18	17	15	15	15	14	17	13	16
		13.7734	13.5017	13.133	13.5519	13.5592	13.7906	13.7276	13.7093	13.9148	13.8838	14.3504	14.2412	14.3205	14.2915	14.3664	14.2	14.3021	14.484	14.2797	14.4653	ACBD6	ACBD6	ACBD6_HUMAN	Q9BR61	Q9BR61	Acyl-CoA-binding domain-containing protein 6	NA	NA	NA	NA	11	9	9	9	10	11	9	11	10	10	12	10	11	12	8	10	8	9
		16.4927	16.56	15.9278	16.5167	15.9585	16.3906	16.523	16.4214	16.2811	16.1765	16.5137	16.5985	16.6285	16.5183	16.6017	15.8756	15.7933	16.702	16.5935	16.4199	DBI	DBI	ACBP_HUMAN	P07108	P07108	Acyl-CoA-binding protein	SASP	NA	altered	NA	13	14	13	14	14	13	15	13	13	15	14	12	14	11	13	11	11	12
		9.84138	10.5926	11.3316	10.9964	10.4788	10.7796	10.4604	10.7099	10.3833	10.7305	10.2894	10.2316	10.5511	10.7561	10.5567	10.1963	10.447	10.4824	10.5577	10.0439	ACD	ACD	ACD_HUMAN	Q96AP0	Q96AP0	Adrenocortical dysplasia protein homolog	NA	NA	NA	NA	0	2	1	1	2	2	1	2	2	1	0	1	2	1	1	1	0	1
		12.0942	12.1394	12.0894	11.9652	12.1264	12.203	12.2599	12.1437	12.2717	12.1457	11.9093	11.9785	11.8473	11.864	11.9614	12.0122	11.9946	12.0386	12.0825	12.0724	ACAD10	ACAD10	ACD10_HUMAN	Q6JQN1	Q6JQN1	Acyl-CoA dehydrogenase family member 10	NA	NA	NA	NA	12	12	15	11	13	13	13	14	14	12	11	9	11	11	7	12	7	12
		15.0126	15.2382	15.2191	15.211	15.1755	15.2641	15.3168	15.4067	15.3164	15.2487	15.0782	15.3027	15.0979	15.2105	15.2633	15.291	15.1759	15.2012	15.1105	15.2011	ACAD11	ACAD11	ACD11_HUMAN	Q709F0	Q709F0	Acyl-CoA dehydrogenase family member 11	NA	NA	NA	NA	27	27	29	30	27	31	28	29	30	29	27	27	26	25	21	29	25	27
		14.7411	14.6708	14.6406	14.7031	14.7986	14.7651	14.8749	14.8779	14.8625	14.8611	14.7427	14.7594	14.6934	14.7422	14.6955	14.7062	14.7876	14.7437	14.6114	14.682	ACADSB	ACADSB	ACDSB_HUMAN	P45954	P45954	Short/branched chain specific acyl-CoA dehydrogenase, mitochondrial	NA	NA	NA	NA	16	20	19	20	20	20	20	21	19	20	21	19	21	19	20	18	20	20
		15.2072	15.0878	15.1475	15.1952	15.1902	15.3097	15.3526	15.1478	15.3034	15.308	15.0925	14.9871	14.9781	15.0617	15.0607	15.1613	14.9959	15.1078	15.1534	15.1658	ACE	ACE	ACE_HUMAN	P12821	P12821	Angiotensin-converting enzyme	NA	NA	NA	NA	31	31	31	27	31	32	30	31	32	32	30	30	31	30	30	28	27	26
		16.675	16.5951	16.5225	16.5472	16.6041	16.7764	16.7397	16.6082	16.6061	16.5991	16.5674	16.4395	16.5679	16.4232	16.3888	16.5391	16.4536	16.4731	16.4506	16.5563	ACIN1	ACIN1	ACINU_HUMAN	Q9UKV3	Q9UKV3	Apoptotic chromatin condensation inducer in the nucleus	NA	NA	NA	NA	51	52	51	51	51	49	53	51	49	51	52	48	46	47	47	51	49	49
		12.4282	12.1175	11.9841	12.429	12.3138	12.2685	12.3893	12.2531	12.015	12.1803	12.3001	12.273	12.2057	12.3657	12.4458	12.277	12.6577	12.3528	12.3536	12.258	TNK2	TNK2	ACK1_HUMAN	Q07912	Q07912	Activated CDC42 kinase 1	NA	NA	NA	NA	7	7	7	7	7	7	6	6	7	7	5	3	6	6	5	6	5	5
		10.3248	9.72749	10.0905	9.34047	9.67765	9.06899	8.62666	9.48587	9.10428	11.3315	9.82497	9.45248	9.49149	10.2398	9.72244	10.4918	8.75254	10.3984	10.5065	9.51505	ATPSCKMT	ATPSCKMT	ACKMT_HUMAN	Q6P4H8	Q6P4H8	ATP synthase subunit C lysine N-methyltransferase	NA	NA	NA	NA	1	1	1	1	0	1	0	1	0	0	1	1	1	0	0	0	0	0
		9.9558	9.91193	10.3666	10.2172	10.2223	10.037	9.93845	9.81691	10.4245	10.2465	10.382	10.4422	10.5222	10.3224	10.6154	10.6663	10.5783	10.5585	10.2602	10.1801	ACKR3	ACKR3	ACKR3_HUMAN	P25106	P25106	Atypical chemokine receptor 3	NA	NA	NA	NA	1	2	1	2	2	2	2	2	2	2	1	2	1	2	2	2	2	2
		15.612	15.7363	15.695	15.5776	15.6848	15.6531	15.7349	15.8029	15.7529	15.7639	15.519	15.6049	15.5546	15.4297	15.5839	15.6304	15.5769	15.6528	15.6055	15.4756	ACTL6A.1	ACTL6A	ACL6A_HUMAN	O96019	O96019	Actin-like protein 6A	NA	NA	NA	NA	21	22	25	24	24	24	22	21	25	24	25	22	23	23	22	24	25	24
		16.1898	16.387	16.3483	16.3185	16.3057	16.1489	16.1622	16.3832	16.1458	16.3233	16.1612	16.4617	16.1718	16.2782	16.1897	16.0658	16.1578	16.1527	15.8884	15.8804	ACTL6A	ACTL6A;ACTL6B	ACL6A_HUMAN;ACL6B_HUMAN	O94805;O96019	O96019;O94805	Actin-like protein 6B	NA	NA	NA	NA	3	3	3	3	3	3	3	3	3	3	3	3	3	3	2	3	3	3
		18.0136	18.0394	18.1254	18.0754	17.9765	18.0071	18.021	18.0458	18.1318	18.1604	17.8513	17.966	17.8882	17.8596	17.8316	17.8671	17.8687	17.8744	17.8756	17.9029	ACLY	ACLY	ACLY_HUMAN	P53396	P53396	ATP-citrate synthase	SASP	NA	altered	NA	106	108	107	110	110	110	109	108	113	113	103	106	110	107	103	107	103	106
		12.9317	12.6091	12.8918	12.8021	12.8589	13.1317	13.0731	12.9566	12.8603	12.5131	12.8559	12.8539	12.8913	12.8736	13.1642	12.7674	12.8579	12.8298	12.8964	12.9909	CHRM2	CHRM2	ACM2_HUMAN	P08172	P08172	Muscarinic acetylcholine receptor M2	NA	NA	NA	NA	8	8	7	7	8	8	8	7	7	7	8	8	6	7	8	8	8	8
		12.8257	13.0757	13.1136	13.3809	13.2223	12.9771	12.8358	13.1913	13.2046	13.019	12.7279	12.9573	13.1831	12.9019	12.7711	12.9976	12.7992	12.7441	12.6129	13.0037	ACOT11	ACOT11	ACO11_HUMAN	Q8WXI4	Q8WXI4	Acyl-coenzyme A thioesterase 11	NA	NA	NA	NA	3	4	5	5	4	4	3	5	4	4	3	3	3	3	3	4	3	3
		14.2201	14.5273	14.7799	14.9147	14.5782	14.4856	14.4427	14.8333	14.3763	14.4753	14.1932	14.1213	14.2493	14.1516	13.5463	14.384	14.0049	14.0833	13.8666	14.0894	ACOT13	ACOT13	ACO13_HUMAN	Q9NPJ3	Q9NPJ3	Acyl-coenzyme A thioesterase 13	NA	NA	NA	NA	5	5	4	4	4	3	3	3	4	5	3	3	4	3	5	4	5	5
		15.7876	15.8432	15.6981	15.7721	15.7863	16.0643	16.132	16.259	16.2255	16.2172	16.0063	15.9978	15.991	15.9462	15.9265	16.183	16.1281	16.1473	16.1627	16.1334	ACO1	ACO1	ACOC_HUMAN	P21399	P21399	Cytoplasmic aconitate hydratase	SASP	NA	altered	NA	49	52	49	52	52	53	52	54	53	53	51	51	49	51	49	51	52	50
		17.1336	17.1327	17.1488	17.058	17.1892	17.1113	17.2379	17.1861	17.1522	17.2026	17.278	17.3302	17.2545	17.2559	17.2433	17.2339	17.2442	17.2541	17.2008	17.1991	ACO2	ACO2	ACON_HUMAN	Q99798	Q99798	Aconitate hydratase, mitochondrial	SASP	NA	altered	NA	64	62	64	64	64	65	65	64	63	64	62	61	62	61	62	61	63	64
		13.5902	13.7484	13.835	14.1489	13.927	13.7784	13.511	13.7031	13.8917	13.6412	13.3151	13.6197	13.3968	13.2414	13.4473	13.7817	13.9314	13.6395	13.585	13.6341	ACOT1.1	ACOT1	ACOT1_HUMAN	Q86TX2	Q86TX2	Acyl-coenzyme A thioesterase 1	NA	NA	NA	NA	5	7	6	6	7	7	7	7	7	6	5	5	6	6	3	6	4	4
		15.9988	15.9856	15.8339	15.8897	15.937	15.9697	16.0636	16.0599	16.0532	15.9791	15.965	16.0456	15.99	16.037	16.0009	16.0671	16.1046	16.0812	16.0638	16.0819	ACOT1	ACOT1;ACOT2	ACOT1_HUMAN;ACOT2_HUMAN	P49753;Q86TX2	Q86TX2;P49753	Acyl-coenzyme A thioesterase 2, mitochondrial	NA	NA	NA	NA	19	21	22	22	22	22	21	21	22	21	22	22	22	22	22	21	22	22
		14.5361	14.5204	14.4265	14.488	14.5969	14.5221	14.6552	14.4581	14.584	14.5259	14.6862	14.7586	14.7216	14.7473	14.7974	14.5878	14.6765	14.6188	14.5137	14.5303	ACOT8	ACOT8	ACOT8_HUMAN	O14734	O14734	Acyl-coenzyme A thioesterase 8	NA	NA	NA	NA	13	14	14	13	12	13	13	14	14	13	13	12	13	13	13	13	12	13
		16.957	16.858	16.8228	16.884	16.8878	17.0052	17.047	16.9796	17.0854	17.0434	16.9836	17.0524	17.0305	16.9336	16.9417	17.0272	17.0635	17.0008	17.0746	16.9327	ACOT9	ACOT9	ACOT9_HUMAN	Q9Y305	Q9Y305	Acyl-coenzyme A thioesterase 9, mitochondrial	SASP	NA	up	NA	33	37	35	34	36	35	33	35	34	35	34	34	36	34	35	35	35	36
		14.8694	14.9146	14.8121	14.92	14.8514	14.8145	14.9516	14.9137	15.0083	14.9808	14.9021	14.9739	14.9902	14.9362	14.8836	14.9333	14.9206	14.8987	14.8263	14.8622	ACOX1	ACOX1	ACOX1_HUMAN	Q15067	Q15067	Peroxisomal acyl-coenzyme A oxidase 1	SASP	NA	down	NA	31	30	30	29	30	30	28	31	34	30	30	29	30	26	27	29	30	30
		15.7869	15.957	15.996	15.9555	15.9529	15.9263	15.9745	16.1057	16.0518	15.9213	16.0802	16.1095	16.1459	16.0627	15.9532	16.1233	16.0295	16.032	16.0141	16.0334	ACOX2	ACOX2	ACOX2_HUMAN	Q99424	Q99424	Peroxisomal acyl-coenzyme A oxidase 2	NA	NA	NA	NA	24	29	28	27	26	27	28	27	28	29	29	25	29	29	28	26	29	28
		14.3465	14.44	14.5291	14.4893	14.39	14.4257	14.4756	14.5332	14.5007	14.5032	14.3039	14.3759	14.3709	14.2479	14.373	14.4306	14.3315	14.2609	14.2434	14.2415	ACOX3	ACOX3	ACOX3_HUMAN	O15254	O15254	Peroxisomal acyl-coenzyme A oxidase 3	NA	NA	NA	NA	29	28	29	27	25	27	28	26	27	29	26	26	27	27	21	23	26	25
		16.5983	16.8142	16.9558	16.7796	16.8309	16.7788	16.7758	16.8579	16.8419	16.8546	16.658	16.7596	16.7354	16.538	16.6861	16.6827	16.6529	16.5838	16.5573	16.6826	APEH	APEH	ACPH_HUMAN	P13798	P13798	Acylamino-acid-releasing enzyme	SASP	NA	altered	NA	22	23	24	24	22	23	22	21	24	23	23	22	22	24	23	21	22	22
		12.0152	11.9105	11.5864	11.6639	11.6397	12.2701	12.2922	11.7786	11.7314	11.7537	12.8363	12.5067	12.3462	12.6231	12.4325	12.4056	12.1416	13.139	13.0683	12.5058	NDUFAB1	NDUFAB1	ACPM_HUMAN	O14561	O14561	Acyl carrier protein, mitochondrial	NA	NA	NA	NA	2	1	2	1	1	1	2	2	1	2	2	2	2	2	2	2	2	2
		12.6672	12.532	12.3839	12.4169	12.6629	12.4493	12.5669	12.4959	12.3856	12.3169	11.4867	11.7687	11.9412	11.4421	11.5673	11.7625	11.9944	11.772	11.7909	11.7042	ACSS1	ACSS1	ACS2L_HUMAN	Q9NUB1	Q9NUB1	Acetyl-coenzyme A synthetase 2-like, mitochondrial	NA	NA	NA	NA	11	11	11	12	11	13	12	11	12	10	4	7	5	7	4	7	6	8
		15.1976	15.1327	15.0559	15.1188	15.1332	15.166	15.203	15.1311	15.2141	15.2174	15.2276	15.1895	15.2447	15.1267	15.1362	15.1196	15.1351	15.1124	15.2151	15.1709	ACSS2	ACSS2	ACSA_HUMAN	Q9NR19	Q9NR19	Acetyl-coenzyme A synthetase, cytoplasmic	NA	NA	NA	NA	19	22	22	22	22	22	22	23	23	22	23	22	22	22	21	22	22	23
		13.9113	13.8079	13.7275	13.7612	13.9226	13.9196	14.0371	13.9796	13.9034	13.9503	13.8343	13.9464	13.8773	13.8737	13.8155	13.8546	13.9337	13.8767	13.8516	13.8762	ACSF2	ACSF2	ACSF2_HUMAN	Q96CM8	Q96CM8	Medium-chain acyl-CoA ligase ACSF2, mitochondrial	NA	NA	NA	NA	19	21	20	20	20	20	21	19	19	21	21	20	21	20	19	18	19	19
		14.0715	13.94	13.9782	13.7629	13.9003	14.039	14.1019	14.1424	14.0842	14.0224	14.1399	14.1129	14.1324	14.0212	14.0985	14.1458	14.1649	14.0436	14.0803	14.0988	ACSF3	ACSF3	ACSF3_HUMAN	Q4G176	Q4G176	Malonate--CoA ligase ACSF3, mitochondrial	NA	NA	NA	NA	18	19	19	19	18	20	20	17	19	20	20	18	19	20	18	19	19	20
		14.9224	14.8774	14.8884	14.829	14.8735	14.8724	14.9066	14.9619	15.098	15.0073	14.9905	14.901	14.9081	14.9093	14.8441	14.9022	14.9043	14.8555	14.9388	14.9669	ACSL1	ACSL1	ACSL1_HUMAN	P33121	P33121	Long-chain-fatty-acid--CoA ligase 1	NA	NA	NA	NA	22	26	28	25	28	27	28	28	27	28	24	26	28	27	21	26	24	25
		16.346	16.2486	15.9837	16.1203	16.1631	16.1634	16.3518	16.2216	16.1832	16.2695	16.1676	16.1589	16.1175	16.1286	16.1004	16.1989	16.136	16.2264	16.0796	16.1467	ACSL3.1	ACSL3	ACSL3_HUMAN	O95573	O95573	Long-chain-fatty-acid--CoA ligase 3	NA	NA	NA	NA	38	40	41	39	41	40	39	39	41	42	38	38	40	38	34	36	35	37
		16.0647	16.066	16.1788	15.9409	16.1577	15.9025	15.9997	16.1332	16.1173	16.0846	15.8718	15.8458	15.7916	15.91	15.7225	16.0548	15.8801	15.854	15.8877	15.8755	ACSL3	ACSL3;ACSL4	ACSL3_HUMAN;ACSL4_HUMAN	O60488;O95573	O95573;O60488	Long-chain-fatty-acid--CoA ligase 4	SASP	NA	up	NA	2	2	2	2	2	2	2	2	2	2	2	2	2	2	2	2	2	2
		15.4068	15.3967	15.303	15.3226	15.3127	15.3378	15.4655	15.4296	15.3851	15.5119	15.3548	15.3873	15.2063	15.25	15.2002	15.3751	15.1881	15.184	15.2329	15.2703	ACSL4	ACSL4	ACSL4_HUMAN	O60488	O60488	Long-chain-fatty-acid--CoA ligase 4	SASP	NA	up	NA	35	37	39	38	37	38	38	37	37	38	37	36	39	38	36	35	39	38
		14.1263	14.1029	13.9092	14.0825	14.0845	14.1573	14.1043	14.2134	14.1569	14.2096	14.2995	14.2596	14.2931	14.1859	14.118	14.2221	14.2319	14.236	14.1414	14.27	ACSS3	ACSS3	ACSS3_HUMAN	Q9H6R3	Q9H6R3	Acyl-CoA synthetase short-chain family member 3, mitochondrial	NA	NA	NA	NA	19	24	24	23	23	23	21	23	23	23	21	22	23	23	20	22	20	20
		12.8854	12.0899	11.8228	11.997	12.6845	11.8666	12.1217	11.4883	11.6314	12.0157	12.6638	12.8879	13.0991	12.8795	12.9037	12.5238	12.2808	12.8933	12.2368	12.5089	ACTA2	ACTA2	ACTA_HUMAN	P62736	P62736	Actin, aortic smooth muscle	SASP	NA	up	NA	2	2	1	2	2	2	2	2	2	2	2	2	2	2	2	2	2	2
		20.2487	19.9391	20.5024	20.4099	20.0669	20.2662	19.5663	19.4784	19.7448	20.1207	19.8911	20.1777	20.1226	20.1117	19.8868	19.5015	20.1589	19.7328	19.3748	19.2319	ACTA1.2	ACTA1;ACTA2;ACTB;ACTG1;ACTG2	ACTA_HUMAN;ACTB_HUMAN;ACTG_HUMAN;ACTH_HUMAN;ACTS_HUMAN	P60709;P62736;P63261;P63267;P68133	P62736;P60709;P68032;P63261;P63267;P68133	Actin, cytoplasmic 1	SASP	NA	altered;up	NA	46	45	48	47	46	47	45	40	44	46	45	47	47	45	44	44	46	48
		20.3719	20.7013	20.8793	21.0747	20.6282	20.4615	20.3054	20.3126	20.4382	20.5562	20.2692	20.2347	20.3322	19.9562	19.5989	20.2867	20.0186	19.6198	19.3985	19.4687	ACTA1	ACTA1;ACTA2;ACTB;ACTG1;ACTG2;POTEI	ACTA_HUMAN;ACTB_HUMAN;ACTG_HUMAN;ACTH_HUMAN;ACTS_HUMAN;POTEI_HUMAN	P0CG38;P60709;P62736;P63261;P63267;P68133	P62736;P60709;P68032;P63261;P63267;P68133;Q6S8J3;A5A3E0;P0CG38;P0CG39	POTE ankyrin domain family member I	SASP	NA	altered;up	NA	5	5	5	5	5	5	5	5	5	4	5	5	5	4	5	5	4	5
		19.7944	19.3556	19.3871	19.578	19.174	19.1593	19.0914	19.3994	19.4056	19.2924	19.2577	19.4366	19.2154	19.4546	19.3014	19.0644	19.5863	19.2232	18.9065	18.8986	ACTA1.3	ACTA1;ACTA2;ACTB;ACTBL2;ACTG1;ACTG2	ACTA_HUMAN;ACTBL_HUMAN;ACTB_HUMAN;ACTG_HUMAN;ACTH_HUMAN;ACTS_HUMAN	P60709;P62736;P63261;P63267;P68133;Q562R1	P62736;Q562R1;Q9BYX7;P60709;P68032;P63261;P63267;P68133;Q6S8J3;A5A3E0	Actin, cytoplasmic 1	SASP	NA	altered;up	NA	20	18	19	19	19	17	17	19	18	17	17	20	20	21	21	20	20	20
		18.0191	17.2329	17.2809	17.0441	17.4501	17.1984	17.0536	16.956	17.439	17.1886	17.4736	17.7004	17.4377	17.7505	17.8304	17.6348	18.1361	17.5417	17.6551	17.5517	ACTA2.1	ACTA2;ACTG2	ACTA_HUMAN;ACTH_HUMAN	P62736;P63267	P62736;P68032;P63267;P68133	Actin, aortic smooth muscle	SASP	NA	up	NA	10	10	9	10	9	9	9	10	11	9	10	9	11	10	10	11	10	10
		19.5978	19.0853	19.2603	19.2319	19.106	19.0718	18.9232	19.1552	19.1947	19.1183	19.1773	19.4577	19.3079	19.4928	19.5256	19.3564	19.554	19.3292	19.1006	19.1654	ACTA1.4	ACTA1;ACTA2;ACTG2	ACTA_HUMAN;ACTH_HUMAN;ACTS_HUMAN	P62736;P63267;P68133	P62736;P68032;P63267;P68133	Actin, aortic smooth muscle	SASP	NA	up	NA	19	19	16	18	19	17	17	17	18	17	19	20	19	19	20	19	19	19
		17.4966	17.2535	17.2482	17.3383	17.6621	17.4039	17.1507	17.3054	17.4002	17.3207	17.4196	17.6935	17.8279	17.7831	17.7628	17.8923	17.7259	17.6552	17.6216	17.6659	ACTA1.5	ACTA1;ACTA2	ACTA_HUMAN;ACTS_HUMAN	P62736;P68133	P62736;P68032;P68133	Actin, aortic smooth muscle	SASP	NA	up	NA	3	3	3	2	2	2	3	3	3	3	3	3	3	3	3	3	3	3
		19.0709	19.2529	19.1315	19.2977	19.0918	19.1685	19.2334	18.9519	18.9285	19.1541	19.2952	19.0265	19.4188	19.2136	19.2244	19.2366	19.4814	19.1571	19.2667	19.3415	ACTB.1	ACTB	ACTB_HUMAN	P60709	P60709	Actin, cytoplasmic 1	SASP	NA	altered	NA	5	5	5	5	5	5	5	5	5	5	5	5	4	5	5	5	4	5
		19.4721	19.0947	19.2463	19.1665	19.0663	19.2062	19.1135	18.9789	19.3557	19.4843	19.3917	19.6094	19.4478	19.4698	19.4914	19.114	19.6881	19.3988	19.2964	19.2523	ACTB.2	ACTB;ACTG1	ACTB_HUMAN;ACTG_HUMAN	P60709;P63261	P60709;P63261	Actin, cytoplasmic 1	SASP	NA	altered	NA	35	36	37	38	34	36	35	37	37	35	34	36	35	37	37	37	36	35
		20.5153	20.3517	20.3349	20.4278	20.3313	20.6186	20.1267	19.9794	20.3863	20.3447	20.2422	20.2424	20.2488	20.3994	20.1104	20.1879	20.3549	20.1374	20.4365	20.3936	ACTA1.1	ACTA1;ACTB;ACTG1;POTEI	ACTB_HUMAN;ACTG_HUMAN;ACTS_HUMAN;POTEI_HUMAN	P0CG38;P60709;P63261;P68133	Q9BYX7;P60709;P68032;P63261;P68133;Q6S8J3;A5A3E0;P0CG38;P0CG39	POTE ankyrin domain family member I	SASP	NA	altered	NA	2	2	2	2	2	2	2	2	2	2	2	2	2	2	2	2	2	2
		18.2354	18.3933	17.7973	18.2112	17.8932	17.9217	18.0866	18.213	18.162	18.2964	18.3042	18.5315	18.4939	18.5604	18.4703	18.4231	18.5556	18.4334	18.3826	18.4286	ACTB	ACTB;ACTG1;POTEI	ACTB_HUMAN;ACTG_HUMAN;POTEI_HUMAN	P0CG38;P60709;P63261	Q9BYX7;P60709;P63261;Q6S8J3;A5A3E0;P0CG38;P0CG39	POTE ankyrin domain family member I	SASP	NA	altered	NA	4	4	4	4	4	4	4	4	4	4	4	4	4	4	4	4	4	4
		19.0067	18.6844	18.52	18.7626	18.7076	18.6544	18.6474	18.4995	18.8968	18.8885	18.8084	19.0111	18.8466	18.8915	18.6711	18.7751	18.8988	18.8395	18.7953	18.7667	ACTBL2	ACTBL2	ACTBL_HUMAN	Q562R1	Q562R1	Beta-actin-like protein 2	SASP	NA	altered	NA	8	7	8	5	5	6	7	6	9	8	6	6	7	7	5	7	7	5
		16.6336	16.4859	15.4431	15.9206	16.1765	16.1102	16.2189	15.8765	15.9531	16.3945	16.4191	16.7432	16.5714	16.4557	16.409	16.2969	16.3676	16.4117	16.3218	16.4236	ACTB.3	ACTB;ACTBL2;ACTG1	ACTBL_HUMAN;ACTB_HUMAN;ACTG_HUMAN	P60709;P63261;Q562R1	Q562R1;P60709;P63261	Actin, cytoplasmic 1	SASP	NA	altered	NA	1	1	1	1	1	1	1	1	1	1	1	1	1	1	1	1	1	1
		18.3922	18.3542	18.2349	18.2299	18.3555	18.08	18.1253	17.989	17.9841	18.1505	18.3131	18.3212	18.2564	18.1807	18.1793	17.9115	18.1997	18.0013	17.993	17.6651	ACTG1	ACTG1	ACTG_HUMAN	P63261	P63261	Actin, cytoplasmic 2	SASP	NA	altered	NA	6	7	6	7	6	6	7	7	7	7	6	7	7	7	7	7	6	6
		13.8145	12.8893	12.1643	12.6209	13.2488	13.0881	12.7219	12.2941	12.7315	12.7681	13.1672	13.6272	13.8087	13.5293	13.7493	13.6229	13.1855	13.4619	13.6339	13.7087	ACTG2	ACTG2	ACTH_HUMAN	P63267	P63267	Actin, gamma-enteric smooth muscle	SASP	NA	up	NA	1	2	2	2	2	2	2	2	2	2	2	2	2	2	2	2	2	2
		19.9571	19.7896	19.6053	19.67	19.754	19.8256	19.8118	19.7473	19.9199	19.9049	19.9894	19.9889	20.0325	19.9996	20.0137	19.9177	20.0308	20.0577	19.9949	20.0409	ACTN1.4	ACTN1	ACTN1_HUMAN	P12814	P12814	Alpha-actinin-1	SASP	NA	altered	NA	106	112	108	108	112	108	106	108	111	108	106	106	107	110	109	105	107	109
		19.4482	19.5958	19.7438	19.9817	19.7562	19.5893	19.6421	19.5655	19.6532	19.6055	19.6467	19.5906	19.6946	19.5968	19.5257	19.7206	19.4074	19.5375	19.4983	19.6388	ACTN1.5	ACTN1;ACTN2	ACTN1_HUMAN;ACTN2_HUMAN	P12814;P35609	P12814;P35609	Alpha-actinin-1	SASP	NA	altered;down	NA	2	3	3	2	2	3	2	3	3	3	3	3	2	3	3	2	2	3
		18.1394	17.9612	18.3906	18.3547	18.3264	18.1973	18.1658	18.1765	18.1421	18.2077	18.3928	18.5196	18.3331	18.46	18.5804	18.5373	18.4876	18.43	18.4612	18.5727	ACTN1.6	ACTN1;ACTN2;ACTN3	ACTN1_HUMAN;ACTN2_HUMAN;ACTN3_HUMAN	P12814;P35609;Q08043	P12814;P35609;Q08043	Alpha-actinin-1	SASP	NA	altered;down	NA	4	4	4	4	4	4	4	4	4	4	4	4	4	4	4	4	4	4
		19.2957	19.2011	18.8699	19.0426	19.0012	19.0055	19.0078	18.8131	19.0097	19.1385	18.9999	19.2041	19.164	19.1165	19.2573	19.1339	18.9966	19.0884	18.9626	19.0226	ACTN1.2	ACTN1;ACTN2;ACTN3;ACTN4	ACTN1_HUMAN;ACTN2_HUMAN;ACTN3_HUMAN;ACTN4_HUMAN	O43707;P12814;P35609;Q08043	P12814;P35609;Q08043;O43707	Alpha-actinin-4	SASP	NA	altered;down	NA	12	13	12	12	12	12	12	13	12	12	12	13	12	13	12	13	12	12
		18.5481	18.3846	18.2685	18.2136	18.4433	18.4681	18.4461	18.3054	18.4186	18.3821	18.48	18.4525	18.4244	18.4913	18.4541	18.3316	18.3427	18.2968	18.3343	18.292	ACTN1.1	ACTN1;ACTN2;ACTN4	ACTN1_HUMAN;ACTN2_HUMAN;ACTN4_HUMAN	O43707;P12814;P35609	P12814;P35609;Q08043;O43707	Alpha-actinin-4	SASP	NA	altered;down	NA	13	12	14	14	13	12	12	13	14	13	11	14	14	12	13	13	13	13
		17.1302	16.8587	17.8985	17.9365	17.1785	17.1073	16.563	16.6456	17.2701	17.104	16.4101	17.2771	16.8435	16.9788	16.7453	16.8356	16.6957	16.0817	16.1121	16.3387	ACTN1.3	ACTN1;ACTN3;ACTN4	ACTN1_HUMAN;ACTN3_HUMAN;ACTN4_HUMAN	O43707;P12814;Q08043	P12814;Q08043;O43707	Alpha-actinin-4	SASP	NA	altered	NA	2	2	2	2	2	2	2	2	2	2	2	2	2	2	2	2	2	2
		19.6658	19.5858	19.5096	19.6946	19.5459	19.5488	19.5022	19.5075	19.6251	19.6099	19.4262	19.478	19.4453	19.4318	19.462	19.3692	19.3454	19.3338	19.2955	19.2602	ACTN1	ACTN1;ACTN4	ACTN1_HUMAN;ACTN4_HUMAN	O43707;P12814	P12814;O43707	Alpha-actinin-4	SASP	NA	altered	NA	14	14	15	16	14	13	14	14	14	15	16	13	15	16	14	13	15	15
		10.8785	14.554	14.9825	14.4995	14.5343	14.8115	14.7088	14.5004	15.0593	15.0403	15.0984	14.838	14.721	15.1362	14.9962	14.6744	14.6166	15.0557	14.8063	14.9659	ACTN2.1	ACTN2	ACTN2_HUMAN	P35609	P35609	Alpha-actinin-2	SASP	NA	down	NA	0	2	2	3	1	3	2	2	4	2	2	2	3	6	2	1	1	3
		13.2432	13.7356	13.6906	13.7637	13.2569	13.1961	13.3802	13.5769	13.41	13.8312	13.5172	13.8732	13.6015	13.9663	13.8216	13.6318	13.6907	13.6727	13.8707	13.8832	ACTN2	ACTN2;ACTN3;ACTN4	ACTN2_HUMAN;ACTN3_HUMAN;ACTN4_HUMAN	O43707;P35609;Q08043	P35609;Q08043;O43707	Alpha-actinin-4	SASP	NA	altered;down	NA	2	1	2	2	2	2	2	2	2	2	1	2	2	2	1	1	2	2
		9.5263	8.6304	10.9378	10.7911	9.97845	11.2889	10.822	11.223	9.99103	10.2577	10.1757	9.53917	9.66196	12.2499	9.91401	10.4791	9.25489	11.0653	10.1394	10.6726	ACTN3	ACTN3	ACTN3_HUMAN	Q08043	Q08043	Alpha-actinin-3	NA	NA	NA	NA	0	0	1	1	0	1	1	1	0	1	0	0	0	5	0	1	0	1
		19.4417	19.2583	19.0938	19.2219	19.334	19.3965	19.3688	19.2602	19.4253	19.3565	19.2953	19.2709	19.332	19.3087	19.3339	19.2808	19.2796	19.3439	19.3278	19.3258	ACTN4	ACTN4	ACTN4_HUMAN	O43707	O43707	Alpha-actinin-4	SASP	NA	altered	NA	103	106	99	105	99	101	100	101	103	103	101	100	106	100	100	98	103	101
		19.2436	13.4514	14.3384	13.7541	13.7353	13.5036	15.194	13.3742	16.1943	16.1501	15.3081	15.1355	14.7437	18.6981	18.6086	18.072	19.369	15.8897	16.1792	14.0959	ACTA1.6	ACTA1	ACTS_HUMAN	P68133	P68133	Actin, alpha skeletal muscle	NA	NA	NA	NA	5	3	3	3	3	2	1	2	2	2	5	2	5	5	5	5	5	3
		16.0908	15.6633	16.0048	15.6891	15.7202	15.8662	16.057	16.0191	15.7323	15.7375	16.1067	16.1834	16.2181	16.2208	16.1325	16.1638	15.989	16.1675	16.1379	16.2084	ACTR1B	ACTR1B	ACTY_HUMAN	P42025	P42025	Beta-centractin	SASP	NA	up	NA	10	11	10	9	11	11	11	11	11	11	11	11	11	11	11	11	11	11
		16.7929	16.8571	16.8386	16.8491	16.6525	16.5998	16.6829	16.6376	16.7154	16.8521	16.5153	16.6858	16.539	16.4307	16.37	16.4745	16.3154	16.4145	16.2792	16.3563	ACTR1A	ACTR1A;ACTR1B	ACTY_HUMAN;ACTZ_HUMAN	P42025;P61163	P42025;P61163	Beta-centractin	SASP	NA	altered;up	NA	17	17	16	14	16	16	16	15	17	16	16	16	16	14	15	14	15	15
		15.7845	15.9237	16.0245	15.9191	16.0406	15.8979	15.9111	16.0372	16.003	16.1247	15.8696	15.945	15.9661	15.9893	15.9774	16.0458	15.9157	16.0237	15.8771	16.0101	ACTR1A.1	ACTR1A	ACTZ_HUMAN	P61163	P61163	Alpha-centractin	SASP	NA	altered	NA	19	18	18	19	18	19	19	18	19	19	19	18	18	20	19	19	19	20
		12.5414	12.1795	11.9623	12.2703	12.3708	12.2654	12.5952	12.1334	11.9934	12.0653	12.3937	12.1882	12.1468	12.3162	12.1629	12.2818	11.9955	12.4142	12.1286	12.1938	ACVRL1	ACVRL1	ACVL1_HUMAN	P37023	P37023	Serine/threonine-protein kinase receptor R3	NA	NA	NA	NA	3	5	5	5	5	4	2	5	3	4	3	3	3	2	5	5	3	2
		13.9569	13.9364	13.7675	13.9024	14.0094	14.1544	14.1163	14.1984	13.9764	14.1351	14.1111	14.0867	14.0369	13.9094	14.0032	14.234	13.9505	13.9697	14.0581	14.1381	ACVR1	ACVR1	ACVR1_HUMAN	Q04771	Q04771	Activin receptor type-1	NA	NA	NA	NA	6	6	7	6	7	7	7	7	7	6	7	6	7	7	7	7	7	7
		14.3194	14.3251	14.4471	14.3607	14.3559	14.3932	14.3254	14.4344	14.4904	14.522	14.555	14.6373	14.6955	14.6046	14.5402	14.4851	14.5061	14.4316	14.363	14.4271	ACY1	ACY1	ACY1_HUMAN	Q03154	Q03154	Aminoacylase-1	SASP	NA	up	NA	16	19	18	18	19	19	17	19	19	19	17	17	18	16	18	20	19	17
		10.5047	9.26849	11.082	10.3618	8.89241	11.1383	11.3796	11.0636	11.0759	11.3525	12.0117	12.2219	11.9748	12.2633	12.3836	12.1024	12.0878	11.9352	12.0172	12.0514	ASPA	ASPA	ACY2_HUMAN	P45381	P45381	Aspartoacylase	NA	NA	NA	NA	0	0	1	1	0	1	1	1	1	1	1	1	1	1	2	1	1	2
		15.8402	15.9137	15.8739	15.9814	15.8197	15.9474	15.8886	16.062	15.9984	16.1616	15.8346	15.8479	15.715	15.6358	15.8069	15.8844	15.8717	15.588	15.5226	15.6916	ACYP1	ACYP1	ACYP1_HUMAN	P07311	P07311	Acylphosphatase-1	NA	NA	NA	NA	7	6	7	7	7	7	7	7	7	7	7	7	7	7	7	7	7	7
		13.4265	13.5923	13.9544	14.054	13.6886	13.638	13.5707	13.7578	13.8756	13.7626	13.6782	13.9301	13.9309	13.6704	13.5756	13.768	13.4259	13.5585	13.6971	13.6952	ACYP2	ACYP2	ACYP2_HUMAN	P14621	P14621	Acylphosphatase-2	NA	NA	NA	NA	4	4	4	4	4	4	4	4	4	4	4	4	4	4	4	4	4	4
		14.8508	14.9671	15.0104	14.9939	15.0523	15.0571	15.0468	15.1076	15.2628	15.1972	15.4133	15.2756	15.3604	15.3493	15.3389	15.3097	15.2751	15.2318	15.3064	15.2255	ADA	ADA	ADA_HUMAN	P00813	P00813	Adenosine deaminase	NA	NA	NA	NA	17	17	17	21	19	20	17	20	20	21	21	20	21	20	19	17	18	20
		15.3466	15.1192	15.0423	15.0059	15.0954	15.2052	15.2077	15.1935	15.0836	15.2489	15.2754	15.2865	15.2595	15.1579	15.1596	15.2373	15.2816	15.1235	15.1723	15.1163	ADAM10	ADAM10	ADA10_HUMAN	O14672	O14672	Disintegrin and metalloproteinase domain-containing protein 10	SASP	NA	altered	NA	26	25	24	26	23	23	28	25	25	26	27	25	25	26	25	25	28	24
		11.879	11.5165	11.3932	11.4646	11.841	11.6627	11.7688	11.54	11.2135	11.7261	11.5852	11.8106	11.6652	11.8434	11.7825	11.5046	11.5342	11.5838	11.7612	11.6003	ADAM15	ADAM15	ADA15_HUMAN	Q13444	Q13444	Disintegrin and metalloproteinase domain-containing protein 15	NA	NA	NA	NA	3	4	3	4	4	4	4	3	3	3	4	3	3	3	4	3	3	3
		14.8334	14.7715	14.7193	14.8375	14.9252	14.9401	14.9803	14.9305	15.021	14.9902	15.0555	14.9725	14.9689	14.8948	14.8789	14.9489	14.6821	14.6978	14.7817	14.7317	ADAM17	ADAM17	ADA17_HUMAN	P78536	P78536	Disintegrin and metalloproteinase domain-containing protein 17	NA	NA	NA	NA	18	15	18	15	17	16	16	16	17	16	17	15	16	16	17	17	17	16
		11.563	11.3201	11.502	11.6361	11.773	11.8586	11.4589	11.4254	11.5369	11.8254	11.4825	11.6834	11.7473	11.9858	12.04	11.5223	11.833	11.8467	11.771	11.5112	ADRA2A	ADRA2A	ADA2A_HUMAN	P08913	P08913	Alpha-2A adrenergic receptor	NA	NA	NA	NA	3	3	2	3	2	2	3	3	2	3	3	3	3	3	3	3	3	3
		13.6026	13.5229	13.543	13.5002	13.7227	13.7558	13.6825	13.554	13.4855	13.4487	13.3603	13.4528	13.4741	13.3385	13.4496	13.5767	13.6362	13.5961	13.408	13.5226	ADAM33	ADAM33	ADA33_HUMAN	Q9BZ11	Q9BZ11	Disintegrin and metalloproteinase domain-containing protein 33	NA	NA	NA	NA	8	7	8	8	7	8	7	7	8	8	8	7	8	7	7	8	8	7
		13.1553	12.7818	12.7025	12.8379	13.0901	12.8579	13.322	13.0439	12.9491	12.8857	13.3571	13.2753	13.0138	13.0618	13.187	13.1158	12.7479	13.1306	12.8879	12.99	ADAL	ADAL	ADAL_HUMAN	Q6DHV7	Q6DHV7	Adenosine deaminase-like protein	NA	NA	NA	NA	5	4	5	6	4	4	4	5	4	6	5	4	4	3	3	4	3	4
		14.0784	13.9541	13.8132	13.6647	13.9358	13.7036	14.0229	13.9177	13.8291	14.0583	13.9553	14.1801	14.1623	14.1067	14.1012	14.0363	14.1581	14.1101	13.9984	14.0124	ADAM9	ADAM9	ADAM9_HUMAN	Q13443	Q13443	Disintegrin and metalloproteinase domain-containing protein 9	SASP	NA	altered	NA	16	17	17	18	16	16	17	17	16	17	17	17	18	15	17	16	17	18
		15.4422	15.3761	15.2522	15.334	15.4173	15.3884	15.5385	15.4808	15.5071	15.4773	15.4494	15.5285	15.4607	15.461	15.4621	15.5009	15.4268	15.4921	15.4275	15.4627	AGPS	AGPS	ADAS_HUMAN	O00116	O00116	Alkyldihydroxyacetonephosphate synthase, peroxisomal	NA	NA	NA	NA	29	29	28	29	28	30	31	29	29	29	30	28	29	30	29	29	30	29
		10.8502	10.6814	10.965	10.5566	9.69042	9.84461	10.0966	10.3409	10.3827	10.8763	11.1333	10.9962	10.3162	10.3557	10.7315	10.6425	10.5681	10.0896	10.0391	10.1406	ADAT1	ADAT1	ADAT1_HUMAN	Q9BUB4	Q9BUB4	tRNA-specific adenosine deaminase 1	NA	NA	NA	NA	2	2	1	1	0	2	2	2	1	2	0	2	1	2	1	2	1	2
		11.4843	11.7785	11.7819	11.6663	11.8305	11.7921	11.7713	12.0029	12.1946	11.4599	11.5295	11.4879	11.6476	11.8309	11.675	11.7013	11.4239	11.6926	11.3765	11.4818	ADAT3	ADAT3	ADAT3_HUMAN	Q96EY9	Q96EY9	Probable inactive tRNA-specific adenosine deaminase-like protein 3	NA	NA	NA	NA	2	2	2	2	2	2	2	2	2	2	2	2	2	2	1	2	2	2
		9.71827	9.82769	9.64682	9.71797	9.59772	9.09236	9.43069	9.70487	9.21684	9.41549	10.1394	10.2169	9.38662	9.80688	10.1122	9.40212	9.85484	10.552	10.1015	10.1741	ADCK1	ADCK1	ADCK1_HUMAN	Q86TW2	Q86TW2	AarF domain-containing protein kinase 1	NA	NA	NA	NA	1	1	1	1	1	1	1	1	1	1	1	1	1	1	1	1	1	1
		10.1532	10.3604	10.3461	10.1702	10.2475	9.74842	10.8126	10.6406	10.2956	10.7728	9.84374	10.2929	10.2612	10.52	10.7887	9.72573	10.7963	10.4112	10.1138	10.2514	ADCK5	ADCK5	ADCK5_HUMAN	Q3MIX3	Q3MIX3	Uncharacterized aarF domain-containing protein kinase 5	NA	NA	NA	NA	2	2	4	2	4	2	2	3	3	3	1	0	2	1	2	3	2	3
		13.6125	13.4619	13.5088	13.4707	13.6319	13.5047	13.7004	13.5779	13.6164	13.4545	13.2992	13.3431	13.326	13.2567	13.6016	13.3343	13.3926	13.2917	13.3571	13.3698	ADCY3	ADCY3	ADCY3_HUMAN	O60266	O60266	Adenylate cyclase type 3	NA	NA	NA	NA	18	18	19	18	17	20	20	20	18	20	18	16	18	17	13	19	17	18
		12.8765	12.5227	12.7142	12.8057	12.4898	12.8952	12.8631	12.5858	12.8361	12.7728	12.6312	12.6599	12.5231	12.5881	12.6703	12.6389	12.6629	12.5977	12.8607	12.6583	ADCY6	ADCY6	ADCY6_HUMAN	O43306	O43306	Adenylate cyclase type 6	NA	NA	NA	NA	5	7	6	6	7	7	5	7	7	7	7	6	5	5	5	8	4	6
		12.6215	12.1109	12.2136	12.289	12.5963	11.8939	12.3915	12.0212	12.1762	12.1305	12.17	11.8581	11.7629	12.8124	12.3046	12.2407	12.6192	12.5586	11.7412	12.3879	ADCY7	ADCY7	ADCY7_HUMAN	P51828	P51828	Adenylate cyclase type 7	NA	NA	NA	NA	5	5	5	5	4	3	5	5	5	6	3	4	3	2	4	4	3	2
		12.7885	12.781	12.7574	12.7661	12.7985	12.8924	12.8542	12.8024	12.8604	12.7645	13.0898	13.0607	12.9611	13.1355	12.9127	12.8405	12.8856	12.7904	12.8495	12.8317	ADCY9	ADCY9	ADCY9_HUMAN	O60503	O60503	Adenylate cyclase type 9	NA	NA	NA	NA	18	17	17	21	19	20	20	18	19	20	19	16	18	18	20	19	15	20
		17.3625	17.3368	17.1608	17.0117	17.2477	17.4554	17.4094	17.3209	17.4726	17.4405	17.3154	17.278	17.306	17.3231	17.2954	17.269	17.31	17.3701	17.2862	17.4084	ADD1	ADD1	ADDA_HUMAN	P35611	P35611	Alpha-adducin	SASP	NA	up	NA	46	50	46	50	46	49	49	48	50	49	51	47	50	48	48	51	47	47
		12.052	12.1358	10.8127	11.3145	10.9892	10.9677	11.2844	11.4332	10.4852	11.5608	10.8528	12.0591	11.5879	11.2983	11.0091	10.9786	11.0625	10.5915	10.5255	10.3933	ADD1.1	ADD1;ADD3	ADDA_HUMAN;ADDG_HUMAN	P35611;Q9UEY8	P35611;P35612;Q9UEY8	Alpha-adducin	SASP	NA	down;up	NA	1	1	1	1	1	1	1	1	1	1	0	1	1	1	1	1	1	1
		17.2772	17.17	17.1412	17.0918	17.1984	17.3599	17.3689	17.2668	17.4044	17.3975	17.2899	17.2858	17.3236	17.2725	17.2471	17.3208	17.303	17.2827	17.3402	17.3539	ADD3	ADD3	ADDG_HUMAN	Q9UEY8	Q9UEY8	Gamma-adducin	SASP	NA	down	NA	59	59	56	54	60	59	60	59	58	59	59	59	60	60	58	59	61	62
		15.0237	14.9589	14.8511	14.8124	15.2133	15.3369	15.1682	15.271	15.2385	15.1083	14.9094	14.9773	14.793	14.8751	14.818	15.2558	15.3192	15.3687	15.4219	15.4725	ADH1B	ADH1B	ADH1B_HUMAN	P00325	P07327;P00325;P00326	All-trans-retinol dehydrogenase [NAD(+)] ADH1B	NA	NA	NA	NA	12	13	14	13	13	13	11	15	13	14	12	11	12	13	12	13	14	13
		10.242	13.2849	12.8497	13.1343	12.9214	9.95423	9.61356	10.4638	12.8802	12.8812	12.3116	10.4546	9.49137	11.529	10.5719	10.4758	12.927	9.88822	9.60815	10.863	ADH7	ADH7	ADH7_HUMAN	P40394	P40394	All-trans-retinol dehydrogenase [NAD(+)] ADH7	NA	NA	NA	NA	0	1	1	1	1	0	0	0	2	1	1	0	0	0	0	0	1	0
		18.3177	18.1496	18.0502	18.0007	18.2042	18.1709	18.2664	18.2596	18.215	18.3554	18.424	18.6132	18.4961	18.5861	18.5255	18.4382	18.6879	18.6659	18.5495	18.5167	ADH5	ADH5	ADHX_HUMAN	P11766	P11766	Alcohol dehydrogenase class-3	SASP	NA	up	NA	26	26	26	26	27	26	26	27	28	25	26	27	25	27	24	26	26	25
		11.0889	11.0971	11.5132	10.6125	11.3075	11.1771	11.0679	11.1754	10.9875	11.2662	11.2193	10.9685	11.1232	11.5645	11.0554	10.838	10.5697	10.663	10.8356	10.6091	SSX2IP	SSX2IP	ADIP_HUMAN	Q9Y2D8	Q9Y2D8	Afadin- and alpha-actinin-binding protein	NA	NA	NA	NA	2	2	2	3	2	2	2	2	2	2	2	2	2	2	1	3	2	2
		13.3222	13.8455	14.3834	14.2757	13.438	13.6459	13.9178	13.6602	13.8278	13.6996	13.7493	13.3305	13.7052	13.4842	13.1985	13.4871	13.4428	13.3186	13.297	13.3085	ADIRF	ADIRF	ADIRF_HUMAN	Q15847	Q15847	Adipogenesis regulatory factor	NA	NA	NA	NA	4	4	4	4	3	4	4	4	4	4	4	2	4	3	2	2	2	4
		16.9763	16.9502	16.8505	16.8336	16.9263	16.9852	17.044	16.9156	16.9517	17.0632	17.1048	17.1782	17.161	17.0575	17.0293	17.0509	17.0826	17.1539	17.1618	17.1158	ADK	ADK	ADK_HUMAN	P55263	P55263	Adenosine kinase	NA	NA	NA	NA	36	38	34	37	36	37	37	38	39	37	37	35	35	38	35	37	37	38
		15.7833	15.913	15.7339	15.7478	15.7824	15.8443	15.9201	15.8099	15.7765	15.7202	15.6793	15.6581	15.6874	15.639	15.6492	15.7615	15.613	15.7298	15.6835	15.7252	ADNP	ADNP	ADNP_HUMAN	Q9H2P0	Q9H2P0	Activity-dependent neuroprotector homeobox protein	NA	NA	NA	NA	36	44	43	40	40	41	41	44	43	42	36	36	38	40	35	42	39	41
		15.9189	15.7892	15.6179	15.5883	15.7799	15.8621	15.8814	15.8869	15.9274	15.9871	16.0523	16.0142	15.9134	16.0972	16.0058	15.9125	16.0035	15.9604	15.9952	15.8262	ADPGK	ADPGK	ADPGK_HUMAN	Q9BRR6	Q9BRR6	ADP-dependent glucokinase	NA	NA	NA	NA	21	20	22	22	21	21	22	22	22	23	20	21	22	20	23	21	22	23
		15.2142	15.1105	15.1163	15.1711	15.0959	15.1774	15.1896	15.2863	15.2331	15.2197	15.2663	15.2834	15.1559	15.2029	15.3056	15.2433	15.2283	15.2525	15.2943	15.2693	AASDHPPT	AASDHPPT	ADPPT_HUMAN	Q9NRN7	Q9NRN7	L-aminoadipate-semialdehyde dehydrogenase-phosphopantetheinyl transferase	NA	NA	NA	NA	18	18	15	18	18	17	19	18	19	18	18	17	18	17	17	18	17	18
		12.0994	12.2227	12.2117	12.3318	12.1319	11.9976	11.9455	12.0836	12.0924	12.0633	12.1881	12.2324	12.109	12.0309	12.2753	12.1336	12.0981	11.834	12.0528	12.28	ADPRH	ADPRH	ADPRH_HUMAN	P54922	P54922	[Protein ADP-ribosylarginine] hydrolase	NA	NA	NA	NA	3	5	5	5	5	4	5	5	5	5	5	4	4	5	2	5	3	4
		15.8788	15.9704	15.9494	15.9071	15.9655	15.8815	15.9694	15.9938	15.9324	16.0315	15.9862	15.9496	16.0107	15.8812	15.8716	16.0034	16.0233	15.9079	15.8937	15.9702	ADPRS	ADPRS	ADPRS_HUMAN	Q9NX46	Q9NX46	ADP-ribose glycohydrolase ARH3	NA	NA	NA	NA	18	17	18	18	17	18	17	19	19	19	18	17	17	18	16	18	17	18
		16.8564	16.7821	16.608	16.7679	16.8925	16.7174	16.8769	16.5345	16.8761	16.8123	16.9242	16.9001	17.0038	16.8584	16.9173	16.7853	16.767	16.7274	16.7916	16.8597	ADRM1	ADRM1	ADRM1_HUMAN	Q16186	Q16186	Proteasomal ubiquitin receptor ADRM1	NA	NA	NA	NA	13	13	11	13	12	13	10	13	12	13	13	12	11	12	12	10	11	11
		15.802	15.8414	15.6661	15.7123	15.838	15.9369	15.9852	15.927	15.9664	15.9152	16.9195	16.9079	16.8882	16.788	16.7647	16.6218	16.5294	16.5319	16.5099	16.5504	FDXR	FDXR	ADRO_HUMAN	P22570	P22570	NADPH:adrenodoxin oxidoreductase, mitochondrial	NA	NA	NA	NA	40	42	42	41	41	41	41	41	42	44	46	46	46	44	42	45	45	47
		12.5152	12.5416	12.9659	12.583	12.4807	12.4501	12.7463	12.9033	12.7671	12.6305	12.7254	12.8328	12.7567	12.582	12.5337	12.8438	12.7209	12.5781	12.6941	12.8836	SCIN	SCIN	ADSV_HUMAN	Q9Y6U3	Q9Y6U3	Adseverin	SASP	NA	down	NA	7	8	7	7	7	8	8	7	9	8	9	8	8	9	5	7	9	10
		15.0214	15.2471	15.1378	15.1082	15.1544	15.1265	15.0376	15.1494	15.2794	15.1649	14.9714	15.1091	15.1745	15.286	14.9184	15.1559	14.9141	14.9923	14.7959	14.9591	SLC25A4.2	SLC25A4	ADT1_HUMAN	P12235	P12235	ADP/ATP translocase 1	NA	NA	NA	NA	4	4	4	4	4	4	4	4	4	4	3	4	4	4	4	4	4	4
		13.7188	14.0019	14.2345	13.9743	13.5395	13.9173	13.5429	13.4237	14.1939	13.6398	13.3096	13.6027	13.1591	13.5747	13.519	13.0549	13.4472	13.2486	13.4369	12.8179	SLC25A4	SLC25A4;SLC25A5	ADT1_HUMAN;ADT2_HUMAN	P05141;P12235	P12235;P05141	ADP/ATP translocase 2	SASP	NA	down	NA	5	4	4	5	5	5	4	5	5	6	5	6	4	4	3	5	5	4
		17.7525	18.1842	18.5033	18.4664	18.2092	18.0775	17.7263	18.068	18.0124	17.9846	17.5076	17.6598	17.7448	17.5493	17.4573	17.6024	17.6059	17.3601	17.3713	17.4719	SLC25A4.1	SLC25A4;SLC25A5;SLC25A6	ADT1_HUMAN;ADT2_HUMAN;ADT3_HUMAN	P05141;P12235;P12236	P12235;P05141;P12236;Q9H0C2	ADP/ATP translocase 2	SASP	NA	altered;down	NA	12	11	12	12	12	12	12	11	11	12	11	12	11	10	11	10	11	11
		17.7167	17.4233	17.0277	16.7591	17.1037	17.5783	17.4946	16.7855	17.2462	17.1671	17.4091	17.2919	17.3737	17.1674	17.5041	17.1922	17.0732	17.5205	17.3944	17.5586	SLC25A4.3	SLC25A4;SLC25A6	ADT1_HUMAN;ADT3_HUMAN	P12235;P12236	P12235;P12236	ADP/ATP translocase 1	SASP	NA	altered	NA	7	7	5	6	7	7	7	7	6	7	7	7	7	7	6	7	7	7
		17.1556	17.0435	16.7803	16.7535	16.8518	17.1259	17.0517	16.5962	17.0235	16.9242	16.7879	16.6844	16.7327	16.733	16.7986	16.7803	16.8666	17.0993	16.9345	16.9568	SLC25A5	SLC25A5	ADT2_HUMAN	P05141	P05141	ADP/ATP translocase 2	SASP	NA	down	NA	10	11	10	9	10	10	9	10	9	10	8	10	10	9	9	9	9	8
		18.9474	19.3692	19.7696	19.6826	19.6987	19.4251	19.2624	19.2764	19.3485	19.5181	18.727	19.0777	19.0237	18.7727	18.8409	19.2221	18.8674	18.9856	18.9567	19.0877	SLC25A5.1	SLC25A5;SLC25A6	ADT2_HUMAN;ADT3_HUMAN	P05141;P12236	P05141;P12236	ADP/ATP translocase 2	SASP	NA	altered;down	NA	3	3	3	3	3	3	3	3	3	3	3	3	3	3	3	3	3	2
		14.4044	14.5731	14.7865	14.7288	14.488	14.348	14.2406	14.3618	14.7094	14.5422	14.2389	14.3643	14.0212	14.2321	14.0804	14.2918	14.2153	14.1614	14.1617	14.2687	SLC25A6	SLC25A6	ADT3_HUMAN	P12236	P12236	ADP/ATP translocase 3	SASP	NA	altered	NA	7	8	8	7	6	8	8	8	8	7	7	8	8	7	8	7	8	8
		14.1188	13.8686	14.3225	14.0018	14.3609	13.6976	13.796	14.0939	13.8836	13.8198	13.7859	13.9872	13.8674	14.0878	14.0137	14.3233	14.1884	13.8214	13.7953	13.8403	FDX1	FDX1	ADX_HUMAN	P10109	P10109	Adrenodoxin, mitochondrial	NA	NA	NA	NA	5	4	4	4	4	3	4	4	4	3	5	5	4	5	5	4	4	5
		14.061	13.9959	14.048	14.038	14.0259	14.0926	14.1094	14.0556	13.8993	13.9664	13.8125	13.8329	13.8493	13.7782	13.694	13.9204	13.7758	13.8259	13.7711	13.8705	AEBP1	AEBP1	AEBP1_HUMAN	Q8IUX7	Q8IUX7	Adipocyte enhancer-binding protein 1	SASP	NA	altered	NA	30	27	30	28	31	32	31	29	32	31	32	29	31	29	29	29	28	30
		14.1079	14.1257	14.1652	14.1458	14.0458	14.1261	14.1287	14.0828	13.9102	14.1801	14.1709	14.2494	14.1959	14.0909	14.1428	14.2916	13.9967	13.9933	13.964	14.1274	ADO	ADO	AEDO_HUMAN	Q96SZ5	Q96SZ5	2-aminoethanethiol dioxygenase	NA	NA	NA	NA	9	10	9	11	9	11	10	10	10	10	10	9	10	11	10	9	11	11
		11.5435	10.9171	10.5306	10.5518	11.0358	10.8134	10.9882	10.8254	11.1642	10.8248	11.7716	11.7121	12.0939	11.3638	11.7501	11.5115	11.58	11.4665	11.6432	11.644	MLLT3	MLLT3	AF9_HUMAN	P42568	P42568	Protein AF-9	NA	NA	NA	NA	2	2	2	2	2	3	2	2	2	2	3	2	2	2	2	2	2	2
		14.6624	14.5871	14.6151	14.6245	14.5512	14.6433	14.5963	14.5763	14.6557	14.726	14.3248	14.387	14.4228	14.3464	14.3621	14.4093	14.3098	14.3016	14.4631	14.4219	AFDN	AFDN	AFAD_HUMAN	P55196	P55196	Afadin	NA	NA	NA	NA	27	29	28	31	31	34	31	33	34	34	31	27	30	30	27	30	32	29
		15.4423	15.2618	15.2953	15.267	15.3302	15.403	15.3338	15.2857	15.367	15.3093	15.2982	15.3076	15.378	15.3878	15.3415	15.2272	15.1166	15.2178	15.2158	15.2454	AFAP1	AFAP1	AFAP1_HUMAN	Q8N556	Q8N556	Actin filament-associated protein 1	NA	NA	NA	NA	24	25	23	25	23	25	22	23	25	23	23	23	24	23	23	23	23	23
		12.8539	12.6937	12.6853	12.8147	12.8159	12.9588	12.9018	12.8439	12.9293	12.8679	12.8637	12.782	12.91	12.7633	12.707	12.8881	12.8926	12.7097	12.7434	12.7456	AFF4	AFF4	AFF4_HUMAN	Q9UHB7	Q9UHB7	AF4/FMR2 family member 4	NA	NA	NA	NA	11	13	14	13	12	11	13	12	13	11	13	12	13	12	11	13	11	12
		11.8315	12.0949	11.7428	12.0953	11.9512	11.8371	11.847	11.9667	12.1428	11.4658	11.7424	11.5379	11.7229	11.6634	11.8766	12.1123	11.8929	11.6349	11.8085	12.0482	AFG1L	AFG1L	AFG1L_HUMAN	Q8WV93	Q8WV93	AFG1-like ATPase	NA	NA	NA	NA	2	4	4	3	5	5	4	4	2	4	4	5	5	5	3	4	3	3
		14.6502	14.582	14.5972	14.6445	14.6904	14.6199	14.6512	14.6385	14.6333	14.6248	14.5526	14.4963	14.5214	14.4444	14.4971	14.541	14.4754	14.4333	14.2686	14.417	SPATA5	SPATA5	AFG2H_HUMAN	Q8NB90	Q8NB90	ATPase family protein 2 homolog	NA	NA	NA	NA	30	30	30	32	31	30	32	31	33	34	30	31	30	29	28	28	28	29
		16.4976	16.4253	16.4126	16.3856	16.5133	16.6036	16.5555	16.5092	16.5859	16.546	16.5016	16.5281	16.5433	16.5223	16.4715	16.5747	16.496	16.5146	16.5101	16.5644	AFG3L2.1	AFG3L2	AFG32_HUMAN	Q9Y4W6	Q9Y4W6	AFG3-like protein 2	NA	NA	NA	NA	41	43	44	42	42	42	41	45	41	40	41	40	37	40	39	39	43	42
		15.9569	15.7106	15.4835	15.4615	15.6718	15.9429	15.8321	15.8328	15.6695	15.6345	16.0337	15.9988	16.1057	16.227	16.1538	16.0162	16.1525	16.129	16.2163	16.1611	AFG3L2	AFG3L2;ANK2	AFG32_HUMAN;ANK2_HUMAN	Q01484;Q9Y4W6	Q9Y4W6;Q01484	Ankyrin-2	NA	NA	NA	NA	1	1	1	1	1	1	1	1	1	1	1	1	1	1	1	1	1	1
		11.7338	11.7801	11.5174	11.7157	11.5868	11.6747	11.7602	11.7379	11.8689	11.6958	11.7099	11.6721	11.7321	11.6188	11.4509	11.8458	11.9266	11.6021	11.4307	11.6318	AFTPH	AFTPH	AFTIN_HUMAN	Q6ULP2	Q6ULP2	Aftiphilin	NA	NA	NA	NA	9	10	10	10	12	11	13	13	11	11	11	8	13	12	11	11	9	12
		13.325	13.4913	13.2418	13.1824	13.3628	13.4796	13.6004	13.5945	13.2889	13.4395	13.4401	13.5257	13.4774	13.4473	13.4224	13.5289	13.4632	13.5932	13.6237	13.7545	ALG10	ALG10;ALG10B	AG10A_HUMAN;AG10B_HUMAN	Q5BKT4;Q5I7T1	Q5BKT4;Q5I7T1	Dol-P-Glc:Glc(2)Man(9)GlcNAc(2)-PP-Dol alpha-1,2-glucosyltransferase	NA	NA	NA	NA	5	6	6	6	6	6	6	6	6	6	5	5	6	6	6	6	5	6
		13.4329	13.7248	13.5163	13.4863	13.5321	13.6905	13.7686	13.8092	13.5434	13.8032	13.8281	13.8899	13.8095	13.8411	13.866	13.9701	13.8471	13.859	13.8911	13.998	GLA	GLA	AGAL_HUMAN	P06280	P06280	Alpha-galactosidase A	NA	NA	NA	NA	8	8	7	7	8	8	8	8	8	8	8	8	8	8	8	8	8	8
		11.071	10.451	10.929	10.5526	10.5496	10.603	10.2284	10.7283	10.8531	10.7663	10.7489	11.0401	11.0051	10.8499	10.9574	10.8146	10.8427	11.0293	10.7461	10.6754	AGAP1.1	AGAP1	AGAP1_HUMAN	Q9UPQ3	Q9UPQ3	Arf-GAP with GTPase, ANK repeat and PH domain-containing protein 1	NA	NA	NA	NA	3	5	2	1	4	2	2	4	4	3	4	2	3	2	3	4	2	2
		11.835	12.3927	12.1023	12.3236	12.2665	12.2409	12.8001	12.4218	12.4585	12.6321	12.5963	12.5968	12.5571	12.5384	12.5198	12.4773	12.2984	12.4131	12.2621	12.6062	AGAP1	AGAP1;AGAP3	AGAP1_HUMAN;AGAP3_HUMAN	Q96P47;Q9UPQ3	Q9UPQ3;Q96P47	Arf-GAP with GTPase, ANK repeat and PH domain-containing protein 3	SASP	NA	up	NA	1	1	1	1	1	1	1	1	1	1	1	1	1	1	1	1	1	1
		12.6527	12.8977	13.0821	13.0132	12.9634	12.6935	12.8341	12.9323	13.0368	12.8929	12.94	13.0462	12.7971	12.9964	12.8485	12.8844	12.6539	12.9432	12.9353	12.9183	AGAP3	AGAP3	AGAP3_HUMAN	Q96P47	Q96P47	Arf-GAP with GTPase, ANK repeat and PH domain-containing protein 3	SASP	NA	up	NA	7	9	9	7	7	9	8	9	9	9	6	6	7	7	5	7	7	7
		16.1071	16.1213	16.0502	16	16.1778	16.0617	16.1415	16.1523	16.2315	16.1653	16.2829	16.3077	16.2742	16.2623	16.2052	16.047	16.184	16.1459	16.1907	16.1802	AGFG1	AGFG1	AGFG1_HUMAN	P52594	P52594	Arf-GAP domain and FG repeat-containing protein 1	NA	NA	NA	NA	17	17	18	20	19	19	19	19	19	19	18	18	19	20	18	18	18	18
		12.8093	12.8262	12.601	12.5603	12.6785	12.7222	12.95	12.581	12.607	12.9017	12.5128	12.3249	12.5308	12.51	12.629	12.6443	12.6318	12.4316	12.5717	12.606	AGFG2	AGFG2	AGFG2_HUMAN	O95081	O95081	Arf-GAP domain and FG repeat-containing protein 2	NA	NA	NA	NA	7	5	6	5	7	7	5	5	6	7	6	6	6	6	7	7	6	5
		11.6351	11.1645	10.9449	11.0383	11.043	10.9462	11.2108	11.373	11.1449	11.3219	11.3442	11.458	11.2944	11.0916	11.0062	11.0685	11.2718	11.0635	11.1849	11.1928	AGGF1	AGGF1	AGGF1_HUMAN	Q8N302	Q8N302	Angiogenic factor with G patch and FHA domains 1	NA	NA	NA	NA	6	5	6	4	2	5	6	4	4	5	5	6	6	5	5	4	5	6
		15.7541	15.7482	15.8051	15.7117	15.9119	15.8024	15.811	15.8077	15.9604	15.9235	15.6925	15.7956	15.745	15.6263	15.6651	15.6939	15.8357	15.6444	15.5788	15.5605	AGK	AGK	AGK_HUMAN	Q53H12	Q53H12	Acylglycerol kinase, mitochondrial	NA	NA	NA	NA	17	19	18	18	18	18	19	19	20	18	19	18	19	19	17	18	19	18
		18.0257	18.0662	17.7834	17.9065	18.0181	17.9536	17.9943	18.0646	17.9819	18.0734	18.1543	18.2837	18.2048	18.1948	18.2108	18.1284	18.24	18.1521	18.1656	18.1837	PGM3	PGM3	AGM1_HUMAN	O95394	O95394	Phosphoacetylglucosamine mutase	SASP	NA	altered	NA	48	52	50	51	51	50	50	50	52	50	50	52	50	51	48	50	51	52
		13.9566	13.972	13.8224	13.889	14.049	13.9481	13.9857	14.0097	13.9049	13.9525	14.3128	14.4389	14.308	14.3264	14.3113	14.4242	14.3786	14.3506	14.376	14.3639	AGO1.3	AGO1	AGO1_HUMAN	Q9UL18	Q9UL18	Protein argonaute-1	NA	NA	NA	NA	19	23	25	20	25	23	24	27	25	25	24	27	26	23	25	25	25	24
		12.8236	12.2971	12.4774	12.427	12.6177	12.4882	12.7379	12.9261	12.9975	13.2037	13.3773	13.4262	13.4206	13.5436	13.4801	13.5148	13.6302	13.7451	13.6289	13.6667	AGO1.2	AGO1;AGO2	AGO1_HUMAN;AGO2_HUMAN	Q9UKV8;Q9UL18	Q9UL18;Q9UKV8	Protein argonaute-2	NA	NA	NA	NA	1	1	1	1	1	1	1	1	1	1	1	1	1	1	1	1	1	1
		15.5693	15.4705	15.4594	15.3817	15.6185	15.4796	15.5435	15.5831	15.5815	15.7534	15.9042	16.0361	16.0523	15.7461	15.8387	15.9376	15.6566	16.0112	15.8089	15.8344	AGO1	AGO1;AGO2;AGO3	AGO1_HUMAN;AGO2_HUMAN;AGO3_HUMAN	Q9H9G7;Q9UKV8;Q9UL18	Q9UL18;Q9UKV8;Q9H9G7;Q9HCK5	Protein argonaute-3	NA	NA	NA	NA	9	9	9	9	9	9	9	9	9	10	9	10	9	10	9	10	9	9
		14.065	13.8802	13.7316	13.9077	13.8077	13.8691	13.9291	13.9609	13.7038	14.1464	14.0285	14.1528	14.0864	14.2418	14.137	14.0813	14.216	14.2033	14.1965	14.1575	AGO1.1	AGO1;AGO3	AGO1_HUMAN;AGO3_HUMAN	Q9H9G7;Q9UL18	Q9UL18;Q9H9G7;Q9HCK5	Protein argonaute-3	NA	NA	NA	NA	6	7	7	6	6	7	7	7	7	7	7	7	7	7	7	6	6	6
		15.4123	15.2727	15.1716	15.1614	15.2995	15.3649	15.4951	15.3502	15.2019	15.3951	15.612	15.6573	15.5775	15.6554	15.5914	15.5958	15.636	15.6421	15.6346	15.6424	AGO2.1	AGO2	AGO2_HUMAN	Q9UKV8	Q9UKV8	Protein argonaute-2	NA	NA	NA	NA	31	35	28	33	33	33	36	30	33	34	34	34	35	33	35	35	34	35
		9.1987	9.97778	9.16798	9.67325	10.085	9.47352	10.1843	9.46884	9.1786	9.89354	9.85707	9.56947	10.2989	10.4644	10.0026	9.56327	10.0479	10.2787	10.1499	9.71666	AGO2	AGO2;AGO3	AGO2_HUMAN;AGO3_HUMAN	Q9H9G7;Q9UKV8	Q9UKV8;Q9H9G7	Protein argonaute-3	NA	NA	NA	NA	1	1	1	0	0	1	1	1	1	1	1	1	1	0	1	1	1	0
		13.2856	13.1897	13.0794	13.1393	13.2233	13.2696	13.2574	13.2061	13.1399	13.1612	13.5086	13.6919	13.5986	13.5971	13.5387	13.4983	13.5927	13.5541	13.4672	13.382	AGO3	AGO3	AGO3_HUMAN	Q9H9G7	Q9H9G7	Protein argonaute-3	NA	NA	NA	NA	12	18	17	16	15	14	13	15	17	16	14	12	16	15	12	15	17	14
		13.2154	13.1803	13.2032	13.3648	13.1572	13.1816	13.0611	13.2285	13.3226	13.179	12.7432	12.9787	12.982	13.0221	12.836	13.0174	12.9224	12.9977	12.8975	12.9637	ADGRA2	ADGRA2	AGRA2_HUMAN	Q96PE1	Q96PE1	Adhesion G protein-coupled receptor A2	NA	NA	NA	NA	12	12	12	12	13	11	12	12	12	11	11	11	11	10	10	11	11	12
		11.6433	12.1589	12.3045	11.8958	12.2941	12.2711	11.8206	12.1625	12.3348	11.9518	11.6254	11.7207	11.5734	11.5701	11.6607	11.8931	11.7282	11.5972	11.66	11.7847	ADGRD1	ADGRD1	AGRD1_HUMAN	Q6QNK2	Q6QNK2	Adhesion G-protein coupled receptor D1	NA	NA	NA	NA	2	3	3	3	3	3	3	3	3	3	3	2	3	2	2	2	3	3
		14.2803	14.3315	14.1283	14.1331	14.3251	14.2947	14.315	14.2399	14.2824	14.3111	13.9456	14.02	13.8343	14.0064	13.9773	14.1554	13.9628	14.082	14.0823	14.0001	ADGRE5	ADGRE5	AGRE5_HUMAN	P48960	P48960	Adhesion G protein-coupled receptor E5	NA	NA	NA	NA	22	22	19	21	20	23	22	20	24	23	20	20	22	21	18	19	18	23
		13.0999	12.8428	12.8798	12.9571	12.9862	12.9303	12.8798	12.8579	12.7098	12.962	13.1645	13.1491	12.9467	12.8656	13.0651	13.0653	12.9554	12.8337	12.8799	12.6887	AGRN	AGRN	AGRIN_HUMAN	O00468	O00468	Agrin	SASP	NA	altered	NA	9	11	10	11	11	10	11	10	11	11	12	10	12	11	9	11	8	9
		11.7253	11.7368	11.8489	12.0154	11.5724	11.6262	11.7146	11.7358	11.6742	11.4826	11.2769	11.6077	11.3311	11.6602	11.8397	11.8889	11.8018	11.6691	12.1523	11.6093	ADGRL2	ADGRL2	AGRL2_HUMAN	O95490	O95490	Adhesion G protein-coupled receptor L2	NA	NA	NA	NA	3	5	5	5	4	4	4	5	4	3	3	4	3	3	3	4	3	4
		12.3811	12.3078	12.5951	12.3685	12.4211	12.5271	12.551	12.3945	12.6267	12.4706	12.4144	12.4823	12.5741	12.3765	12.449	12.5974	12.3645	12.2217	12.2266	12.3998	AHDC1	AHDC1	AHDC1_HUMAN	Q5TGY3	Q5TGY3	AT-hook DNA-binding motif-containing protein 1	NA	NA	NA	NA	11	14	16	17	16	15	16	15	13	16	14	12	13	14	10	14	10	15
		20.7568	20.6761	20.4574	20.5176	20.6084	20.7184	20.6388	20.5462	20.6817	20.6892	20.6497	20.6043	20.6949	20.5337	20.4984	20.5955	20.459	20.5565	20.5564	20.612	AHNAK	AHNAK	AHNK_HUMAN	Q09666	Q09666	Neuroblast differentiation-associated protein AHNAK	SASP	NA	altered	NA	886	917	875	896	872	907	894	898	903	917	900	873	899	884	844	877	861	879
		16.7788	16.6271	16.5505	16.5955	16.695	16.781	16.781	16.6326	16.7216	16.6372	16.9419	16.8481	16.904	16.8561	16.8915	16.8173	16.6888	16.7968	16.7916	16.8172	AHNAK2	AHNAK2	AHNK2_HUMAN	Q8IVF2	Q8IVF2	Protein AHNAK2	SASP	NA	down	NA	172	184	172	180	176	185	181	177	184	178	181	168	180	180	176	181	174	182
		13.9908	14.0583	14.2567	14.2183	14.2663	14.236	14.0858	14.2146	14.168	14.2527	13.8659	14.0467	13.993	13.9471	13.8055	13.9417	13.8948	13.8659	13.8304	14.0117	AHR.1	AHR	AHR_HUMAN	P35869	P35869	Aryl hydrocarbon receptor	NA	NA	NA	NA	12	16	17	18	17	18	18	17	16	17	16	15	14	12	12	17	15	18
		11.8331	11.689	11.4363	11.678	11.38	11.3398	11.6741	11.7269	12.0944	12.0505	11.562	10.703	11.5706	11.572	11.4055	11.4654	11.926	11.7805	11.5084	12.1537	AHRR	AHRR	AHRR_HUMAN	A9YTQ3	A9YTQ3	Aryl hydrocarbon receptor repressor	NA	NA	NA	NA	3	3	3	3	2	2	1	3	3	3	1	0	3	2	2	2	2	2
		12.3013	13.3233	13.2794	13.4051	13.138	12.5184	12.4492	13.0967	12.9032	13.0171	11.5564	12.2527	12.5832	11.7982	11.3048	12.7476	11.9824	12.1895	12.0419	12.2247	AHR	AHR;AHRR	AHRR_HUMAN;AHR_HUMAN	A9YTQ3;P35869	A9YTQ3;P35869	Aryl hydrocarbon receptor repressor	NA	NA	NA	NA	1	1	1	1	1	1	1	1	1	1	1	1	1	1	0	1	1	1
		16.7516	16.9987	17.0154	17.0246	16.9881	16.8984	16.9497	16.9339	16.9317	16.9503	16.8441	16.877	16.8761	16.7732	16.7132	16.8194	16.5907	16.5962	16.707	16.8188	AHSA1	AHSA1	AHSA1_HUMAN	O95433	O95433	Activator of 90 kDa heat shock protein ATPase homolog 1	SASP	NA	down	NA	27	28	31	32	30	30	26	29	31	30	26	29	28	28	27	27	26	27
		16.294	16.1935	16.0397	16.1066	16.3353	16.3676	16.3631	16.2797	16.4286	16.349	16.4873	16.4346	16.5097	16.4986	16.4917	16.4345	16.4309	16.4428	16.4369	16.4917	AIDA	AIDA	AIDA_HUMAN	Q96BJ3	Q96BJ3	Axin interactor, dorsalization-associated protein	NA	NA	NA	NA	17	17	16	17	16	19	20	19	20	18	20	18	20	19	18	19	19	20
		16.2581	16.4022	16.3473	16.4047	16.4517	16.4158	16.4828	16.4667	16.4982	16.4945	16.4353	16.4848	16.413	16.4565	16.3904	16.4455	16.4079	16.4959	16.4031	16.4056	AIFM1	AIFM1	AIFM1_HUMAN	O95831	O95831	Apoptosis-inducing factor 1, mitochondrial	NA	NA	NA	NA	36	37	36	35	35	34	35	35	35	37	34	35	33	36	34	37	35	35
		14.8461	14.634	13.9462	13.4897	14.8606	14.8659	14.6988	14.1732	14.4398	14.594	14.8547	14.8666	14.9435	14.7534	14.7368	14.3958	14.9697	14.6907	14.8723	14.7914	AIG1	AIG1	AIG1_HUMAN	Q9NVV5	Q9NVV5	Androgen-induced gene 1 protein	NA	NA	NA	NA	3	3	3	3	3	3	3	3	2	3	3	3	3	3	2	3	2	3
		16.765	16.6894	16.6398	16.506	16.7894	16.7464	16.8573	16.6801	16.7983	16.8838	16.906	16.912	16.9272	16.8836	16.845	16.8017	16.859	16.7893	16.7758	16.7178	AIMP1	AIMP1	AIMP1_HUMAN	Q12904	Q12904	Aminoacyl tRNA synthase complex-interacting multifunctional protein 1	SASP	NA	up	NA	30	30	29	30	29	30	29	29	29	30	30	30	30	29	29	30	30	29
		15.6996	15.5915	15.4454	15.4263	15.5121	15.6816	15.6285	15.4598	15.6669	15.6908	15.6749	15.7656	15.7036	15.5971	15.6204	15.721	15.6519	15.5866	15.5109	15.6212	AIMP2	AIMP2	AIMP2_HUMAN	Q13155	Q13155	Aminoacyl tRNA synthase complex-interacting multifunctional protein 2	NA	NA	NA	NA	13	14	14	15	15	15	15	14	15	14	15	14	14	14	13	15	13	15
		13.2376	13.2302	13.2988	13.4209	13.3449	13.6133	13.3494	13.4404	13.4657	13.4167	13.7704	13.6998	13.6483	13.6493	13.7056	13.7118	13.3799	13.5079	13.4398	13.6157	INA.2	INA	AINX_HUMAN	Q16352	Q16352	Alpha-internexin	NA	NA	NA	NA	18	16	15	16	15	17	19	19	18	18	18	18	19	17	16	19	17	16
		18.7694	19.5684	19.9204	20.1348	19.5884	19.3957	18.6351	19.0051	19.3695	19.3952	18.3537	18.3334	18.4176	18.0164	17.8139	18.8146	17.9295	17.9857	17.7319	18.1923	DES.2	DES;INA;NEFL;NEFM;VIM	AINX_HUMAN;DESM_HUMAN;NFL_HUMAN;NFM_HUMAN;VIME_HUMAN	P07196;P07197;P08670;P17661;Q16352	Q16352;P17661;P12036;P07196;P07197;P08670	Neurofilament light polypeptide	SASP	NA	altered;down	NA	1	1	1	1	1	1	1	1	1	1	1	1	1	1	1	1	1	1
		14.4733	14.0185	13.5028	14.0247	13.4481	13.6923	14.0467	14.4577	14.2651	14.5764	15.3768	15.0115	15.128	14.8088	12.6228	12.9554	13.3318	13.0549	14.9733	15.0033	DES.3	DES;INA;NEFM;VIM	AINX_HUMAN;DESM_HUMAN;NFM_HUMAN;VIME_HUMAN	P07197;P08670;P17661;Q16352	Q16352;P17661;P07197;P08670	Neurofilament medium polypeptide	SASP	NA	altered	NA	2	2	2	2	2	2	2	2	2	2	2	2	2	2	2	2	2	2
		12.2902	9.97178	13.5598	13.4176	13.1189	12.9631	9.49159	12.5797	12.6217	12.4772	11.4059	10.6412	11.4798	11.5255	11.9879	12.5349	11.5915	11.7415	11.8982	12.4496	INA	INA;NEFL;NEFM	AINX_HUMAN;NFL_HUMAN;NFM_HUMAN	P07196;P07197;Q16352	Q16352;P07196;P07197	Neurofilament light polypeptide	SASP	NA	down	NA	1	0	1	1	1	1	0	1	1	1	1	1	1	1	1	1	1	1
		12.7406	13.2875	13.3792	13.7116	13.5414	13.6214	12.6655	13.4022	13.6134	13.1664	13.213	13.0614	12.6862	12.9026	12.8519	13.556	13.1905	12.9787	12.6697	12.5206	INA.1	INA;NEFM	AINX_HUMAN;NFM_HUMAN	P07197;Q16352	Q16352;P07196;P07197	Neurofilament medium polypeptide	NA	NA	NA	NA	1	2	2	2	2	2	2	2	1	2	2	2	2	2	1	2	2	2
		16.1201	16.073	15.9754	15.7938	15.9751	16.0894	16.0542	15.9987	16.0748	16.1184	16.0872	16.22	16.1611	16.1001	16.0637	16.003	16.0605	16.0837	16.0461	16.0375	AIP	AIP	AIP_HUMAN	O00170	O00170	AH receptor-interacting protein	SASP	NA	up	NA	23	24	23	23	22	23	21	24	23	23	24	24	24	24	21	24	23	24
		11.8054	11.4557	11.6314	11.5082	11.7571	11.8263	11.9339	11.5006	12.2146	11.7664	12.086	11.9651	12.0056	11.8773	11.7824	11.677	11.864	11.5991	11.9456	11.6962	AJUBA	AJUBA	AJUBA_HUMAN	Q96IF1	Q96IF1	LIM domain-containing protein ajuba	NA	NA	NA	NA	2	2	2	2	2	2	2	2	2	2	2	2	2	2	2	2	2	2
		14.0763	14.0999	14.0652	14.1198	14.139	14.1858	14.2333	14.202	14.2357	14.1879	14.1983	14.1735	14.2147	14.1659	14.1179	14.2047	14.1173	14.1434	14.1527	14.3022	AKAP17A	AKAP17A	AK17A_HUMAN	Q02040	Q02040	A-kinase anchor protein 17A	NA	NA	NA	NA	17	14	14	14	18	14	17	13	14	15	15	15	14	15	12	16	15	15
		17.6038	17.6274	17.5331	17.5027	17.7155	17.5731	17.6278	17.5701	17.7261	17.7575	17.7702	17.9855	17.8013	17.7859	17.8079	17.7579	17.7917	17.7896	17.6599	17.6987	AKR1A1	AKR1A1	AK1A1_HUMAN	P14550	P14550	Aldo-keto reductase family 1 member A1	SASP	NA	up	NA	31	31	31	32	29	32	31	30	30	31	30	31	31	30	31	31	28	30
		14.2602	13.8695	13.9622	14.1925	14.5723	14.2863	14.3968	14.409	13.8625	14.2898	14.596	14.6744	14.7219	14.4349	14.5055	14.9243	14.6618	14.4607	14.6808	14.7131	AKR1B10	AKR1B10;AKR1B15	AK1BA_HUMAN;AK1BF_HUMAN	C9JRZ8;O60218	O60218;C9JRZ8	Aldo-keto reductase family 1 member B15	NA	NA	NA	NA	2	2	2	2	3	3	3	2	2	3	2	3	2	3	3	3	2	2
		13.0106	12.8821	12.7776	12.6004	13.1858	13.1372	13.1128	12.6336	12.4528	13.5716	13.5683	13.7227	13.2965	13.6802	13.3352	13.357	13.5994	13.6529	14.2288	13.6473	AKR1C1.3	AKR1C1	AK1C1_HUMAN	Q04828	Q04828	Aldo-keto reductase family 1 member C1	SASP	NA	up	NA	2	3	3	3	2	3	2	3	3	3	2	3	2	3	3	3	3	3
		15.7368	15.7844	15.7258	15.4466	15.7664	15.9491	15.8975	15.8276	15.9811	15.9741	15.8784	16.0502	15.7974	15.9779	15.8189	16.0604	16.262	16.202	16.2577	16.2805	AKR1C1.2	AKR1C1;AKR1C2	AK1C1_HUMAN;AK1C2_HUMAN	P52895;Q04828	Q04828;P52895	Aldo-keto reductase family 1 member C2	SASP	NA	up	NA	20	20	19	19	20	20	20	21	21	21	18	20	20	20	21	20	20	19
		17.5236	17.7764	18.0165	17.9411	17.9172	18.147	17.9622	18.1879	18.1485	18.255	18.0925	18.101	18.0161	18.1064	17.9838	18.3455	18.4734	18.3439	18.4244	18.5338	AKR1C1	AKR1C1;AKR1C2;AKR1C3	AK1C1_HUMAN;AK1C2_HUMAN;AK1C3_HUMAN	P42330;P52895;Q04828	Q04828;P52895;P42330	Aldo-keto reductase family 1 member C3	SASP	NA	up	NA	5	5	4	4	4	4	4	4	5	4	4	5	4	4	5	4	4	4
		18.3847	18.1777	18.1791	17.9797	18.2722	18.5218	18.6351	18.5111	18.4728	18.5859	18.5687	18.691	18.573	18.6105	18.4756	18.6397	18.8687	18.7809	18.7788	18.8281	AKR1C1.1	AKR1C1;AKR1C3	AK1C1_HUMAN;AK1C3_HUMAN	P42330;Q04828	Q04828;P42330	Aldo-keto reductase family 1 member C3	SASP	NA	up	NA	11	10	11	10	10	11	9	11	11	10	10	10	9	10	10	10	11	10
		16.0434	15.7162	15.7426	15.4709	15.6973	15.9273	16.0172	16.0287	15.9701	15.9744	15.941	15.9358	15.9341	16.0483	15.9469	16.1084	16.3361	16.3195	16.4873	16.3504	AKR1C2	AKR1C2	AK1C2_HUMAN	P52895	P52895	Aldo-keto reductase family 1 member C2	NA	NA	NA	NA	7	9	9	9	8	9	9	8	8	8	8	8	7	7	7	6	7	7
		16.412	16.0265	15.8044	15.7576	16.0526	16.288	16.4322	16.2674	16.4029	16.587	16.5874	16.5688	16.371	16.5716	16.4956	16.467	16.7579	16.8403	16.713	16.5926	AKR1C3	AKR1C3	AK1C3_HUMAN	P42330	P42330	Aldo-keto reductase family 1 member C3	SASP	NA	up	NA	12	15	14	15	15	16	14	14	15	16	13	14	15	14	14	14	15	15
		10.5653	18.8977	9.00401	19.053	10.5377	10.7418	19.0674	9.09916	9.90047	9.85769	18.8463	18.7563	18.8778	18.5531	18.6847	9.05044	8.90851	18.9587	10.6198	9.72798	AKR1D1	AKR1D1	AK1D1_HUMAN	P51857	P51857	Aldo-keto reductase family 1 member D1	NA	NA	NA	NA	0	1	0	1	0	0	1	0	0	0	1	1	1	1	1	0	0	1
		12.8338	12.8436	12.8245	12.8256	12.8306	12.9585	12.8601	12.8654	13.0142	13.0001	13.1257	13.0013	13.0942	13.0511	12.9435	12.999	13.0594	13.089	13.1325	13.1239	AKAP10	AKAP10	AKA10_HUMAN	O43572	O43572	A-kinase anchor protein 10, mitochondrial	NA	NA	NA	NA	15	18	16	18	15	18	14	17	16	17	17	15	16	16	16	17	15	15
		12.8522	12.4908	12.5161	12.3509	12.5782	12.5277	12.6735	12.5393	12.4083	12.5653	12.5102	12.5485	12.531	12.5569	12.5103	12.4232	12.3948	12.4629	12.4013	12.5783	AKAP11	AKAP11	AKA11_HUMAN	Q9UKA4	Q9UKA4	A-kinase anchor protein 11	NA	NA	NA	NA	19	21	18	22	23	23	19	23	24	21	17	17	21	18	21	16	16	19
		17.8797	17.6538	17.6792	17.7147	17.8437	18.1245	17.9209	17.7768	17.9646	17.8694	17.6725	17.5243	17.6947	17.6429	17.6521	17.6745	17.6334	17.7157	17.6807	17.7344	AKAP12	AKAP12	AKA12_HUMAN	Q02952	Q02952	A-kinase anchor protein 12	SASP	NA	altered	NA	161	160	164	158	158	166	162	163	166	167	157	157	159	161	160	165	158	164
		10.0842	10.5793	10.4063	10.3163	9.94543	9.98064	10.1963	10.4	10.7341	10.3144	10.6903	9.86786	9.90858	10.1074	10.0454	10.4918	10.6053	10.3102	9.624	10.3645	AKAP7	AKAP7	AKA7G_HUMAN	Q9P0M2	Q9P0M2	A-kinase anchor protein 7 isoform gamma	NA	NA	NA	NA	1	1	1	1	1	1	1	1	1	1	0	1	1	1	0	1	0	1
		11.8816	11.5073	11.6557	11.6186	11.6758	11.9146	11.7738	11.8618	11.7629	11.6244	11.7132	11.6444	11.8307	11.476	11.7729	11.6525	11.8061	11.652	11.8181	11.7008	AKAP1	AKAP1	AKAP1_HUMAN	Q92667	Q92667	A-kinase anchor protein 1, mitochondrial	NA	NA	NA	NA	7	7	8	7	7	8	7	7	6	6	8	7	8	8	6	7	8	7
		16.5603	16.4519	16.3748	16.3553	16.4711	16.5273	16.4934	16.4736	16.5182	16.6775	16.6813	16.5977	16.7177	16.5506	16.5929	16.6278	16.4505	16.541	16.4752	16.5705	AKAP2	AKAP2	AKAP2_HUMAN	Q9Y2D5	Q9Y2D5	A-kinase anchor protein 2	SASP	NA	down	NA	51	54	55	54	52	53	52	56	56	55	56	57	55	55	57	56	56	56
		14.0716	14.2252	14.1709	14.2951	14.2706	14.3531	14.2324	14.2193	14.2654	14.3751	14.0985	14.0012	14.0704	14.047	14.0796	14.1778	14.0601	14.0084	14.1126	14.197	AKAP8	AKAP8	AKAP8_HUMAN	O43823	O43823	A-kinase anchor protein 8	NA	NA	NA	NA	13	16	13	16	14	16	15	15	15	16	15	16	15	16	12	16	15	15
		13.3957	13.1018	13.0232	13.0866	13.1691	13.2912	13.2492	13.0416	13.1448	13.105	13.1245	13.0896	13.2114	13.0476	13.236	13.1236	13.0014	13.1441	13.135	13.1973	AKAP9	AKAP9	AKAP9_HUMAN	Q99996	Q99996	A-kinase anchor protein 9	NA	NA	NA	NA	77	78	72	76	80	84	81	77	75	76	76	71	76	74	72	73	60	79
		16.2941	16.3101	16.2059	16.3044	16.254	16.1631	16.1478	16.2239	16.1154	16.215	16.2975	16.4493	16.3421	16.3463	16.2876	16.3193	16.3497	16.292	16.3132	16.4352	AKR1E2	AKR1E2	AKCL2_HUMAN	Q96JD6	Q96JD6	1,5-anhydro-D-fructose reductase	NA	NA	NA	NA	1	1	1	1	1	1	1	1	1	1	1	1	1	1	1	1	1	1
		12.5594	12.1297	12.1687	12.0438	12.2207	12.3894	12.466	12.4051	12.2736	12.3005	12.5088	12.565	12.4715	12.5029	12.521	12.5167	12.4489	12.2916	12.6308	12.5253	ANKIB1	ANKIB1	AKIB1_HUMAN	Q9P2G1	Q9P2G1	Ankyrin repeat and IBR domain-containing protein 1	NA	NA	NA	NA	14	14	12	13	14	15	12	12	14	12	13	12	13	14	15	14	14	14
		12.9933	13.6981	13.9565	13.9517	13.9643	13.3958	13.3077	13.3576	13.1782	13.2143	12.4842	12.51	12.8528	12.4699	12.4712	13.0141	12.4589	12.6122	12.0831	12.553	AURKAIP1	AURKAIP1	AKIP_HUMAN	Q9NWT8	Q9NWT8	Aurora kinase A-interacting protein	SASP	NA	up	NA	1	1	1	1	1	1	1	1	1	1	1	1	1	1	1	1	1	1
		13.9301	13.8422	13.8785	13.9601	14.0554	14.09	14.063	13.9201	14.06	14.1083	14.1002	13.9323	14.0985	13.9139	14.0378	13.9632	13.9512	13.9842	13.9375	13.9981	AKAP13	AKAP13	AKP13_HUMAN	Q12802	Q12802	A-kinase anchor protein 13	NA	NA	NA	NA	40	42	43	42	41	43	43	46	44	43	44	38	39	42	36	42	39	40
		15.0182	14.8144	14.6142	14.8452	14.8336	14.9541	15.1062	14.8959	14.8324	14.6699	15.1289	15.0086	15.1788	15.1575	15.157	15.1687	15.0981	15.1442	15.1297	15.1309	AKAP8L	AKAP8L	AKP8L_HUMAN	Q9ULX6	Q9ULX6	A-kinase anchor protein 8-like	NA	NA	NA	NA	18	17	18	19	18	19	18	19	21	21	20	20	20	20	17	21	19	21
		14.4775	14.5167	14.4386	14.3849	14.5751	14.5646	14.2986	14.5368	14.5985	14.576	14.6233	14.7951	14.6499	14.7095	14.7526	14.747	14.6953	14.6717	14.7303	14.8472	AKT1	AKT1	AKT1_HUMAN	P31749	P31749	RAC-alpha serine/threonine-protein kinase	NA	NA	NA	NA	23	26	28	26	26	27	27	27	26	26	26	26	27	26	25	26	25	27
		14.3425	14.428	14.4857	14.3104	14.3551	14.4606	14.3874	14.3312	14.4443	14.582	14.5419	14.6789	14.6929	14.5046	14.6503	14.5606	14.5148	14.5312	14.7461	14.7319	AKT1.1	AKT1;AKT2	AKT1_HUMAN;AKT2_HUMAN	P31749;P31751	P31749;P31751	RAC-alpha serine/threonine-protein kinase	NA	NA	NA	NA	1	1	1	1	1	1	1	1	1	1	2	1	2	2	1	1	1	2
		15.0071	14.6168	14.3172	14.5994	14.537	14.6841	14.6732	14.6938	14.2846	14.3379	14.865	14.924	14.7983	14.7971	14.8052	14.7474	14.6891	14.709	14.6146	14.6555	AKT1.2	AKT1;AKT2;AKT3	AKT1_HUMAN;AKT2_HUMAN;AKT3_HUMAN	P31749;P31751;Q9Y243	P31749;P31751;Q9Y243	RAC-alpha serine/threonine-protein kinase	NA	NA	NA	NA	5	5	5	4	4	5	5	5	5	5	5	5	5	5	5	5	5	5
		14.8036	14.3294	14.0853	14.0162	14.383	14.3633	14.4322	14.2616	14.2633	14.3107	14.2912	14.663	14.5341	14.3412	14.6498	14.3937	14.5107	14.5316	14.5969	14.5641	AKT1.3	AKT1;AKT3	AKT1_HUMAN;AKT3_HUMAN	P31749;Q9Y243	P31749;Q9Y243	RAC-alpha serine/threonine-protein kinase	NA	NA	NA	NA	6	6	5	6	5	5	6	6	6	6	5	6	5	5	6	6	6	6
		14.7029	14.7886	14.7419	14.7283	14.7828	14.7864	14.8243	14.8198	14.6621	14.8357	14.953	14.9692	14.998	15.0393	15.0213	15.1229	15.0553	15.0093	15.1024	15.1572	AKT2	AKT2	AKT2_HUMAN	P31751	P31751	RAC-beta serine/threonine-protein kinase	NA	NA	NA	NA	28	27	27	27	28	26	27	27	26	28	25	26	28	25	26	28	26	24
		10.7857	10.4377	10.4602	10.568	10.6997	10.6708	10.732	10.2635	10.6681	9.9067	10.695	10.1575	10.4669	10.2679	10.6671	9.96306	9.90974	10.2174	10.1222	10.1908	AKT2.1	AKT2;AKT3	AKT2_HUMAN;AKT3_HUMAN	P31751;Q9Y243	P31751;Q9Y243	RAC-beta serine/threonine-protein kinase	NA	NA	NA	NA	1	1	1	1	1	1	1	1	1	1	1	1	1	1	1	1	1	1
		13.2325	13.4147	13.2762	13.2235	13.3537	13.3252	13.485	13.4859	13.4754	13.5316	13.616	13.5914	13.5391	13.6727	13.6058	13.6326	13.5704	13.497	13.5137	13.6174	AKT3	AKT3	AKT3_HUMAN	Q9Y243	Q9Y243	RAC-gamma serine/threonine-protein kinase	NA	NA	NA	NA	19	20	19	20	16	20	19	18	18	17	18	18	17	18	19	19	18	19
		13.3186	12.9337	12.9706	12.7977	12.9906	12.9519	13.0727	12.8347	13.026	12.9825	13.0971	13.15	13.3514	13.144	13.2509	13.2406	13.2635	13.1956	13.2533	13.2264	AKTIP	AKTIP	AKTIP_HUMAN	Q9H8T0	Q9H8T0	AKT-interacting protein	NA	NA	NA	NA	5	5	5	5	5	6	5	5	6	4	4	5	6	6	5	6	5	5
		13.7263	13.8719	13.8097	14.0369	13.8784	13.9085	13.8687	13.7753	13.8467	13.8513	13.9675	13.9207	13.891	13.8679	13.8001	13.6155	13.5406	13.4744	13.2487	13.2177	AKT1S1	AKT1S1	AKTS1_HUMAN	Q96B36	Q96B36	Proline-rich AKT1 substrate 1	NA	NA	NA	NA	6	6	6	6	6	6	6	6	6	6	6	6	6	5	6	6	6	6
		10.7456	10.3506	10.5835	10.9304	10.2339	10.4626	10.5714	10.6252	9.93269	10.6607	10.6768	11.0124	10.9704	10.7061	11.0236	10.7789	11.0289	11.096	10.4359	10.6321	ARL14EP	ARL14EP	AL14E_HUMAN	Q8N8R7	Q8N8R7	ARL14 effector protein	NA	NA	NA	NA	1	2	4	3	2	3	3	3	2	3	3	4	2	3	3	3	2	3
		19.8741	19.8137	19.7562	19.8495	19.7689	19.7639	19.6833	19.7883	19.8817	19.9417	19.772	19.9168	19.8876	19.8567	19.8175	19.709	19.8627	19.8316	19.6933	19.7461	ALDH1A1	ALDH1A1	AL1A1_HUMAN	P00352	P00352	Retinal dehydrogenase 1	NA	NA	NA	NA	68	71	70	72	67	69	66	69	70	72	67	71	70	70	65	66	67	69
		17.421	17.7096	18.6709	18.586	17.9306	17.8672	17.3933	18.0684	18.1749	17.9525	17.3188	17.6099	17.6056	17.2993	17.6014	17.7709	17.5708	17.5627	17.5528	17.9186	ALDH1A1.2	ALDH1A1;ALDH1A3;ALDH1B1;ALDH2	AL1A1_HUMAN;AL1A3_HUMAN;AL1B1_HUMAN;ALDH2_HUMAN	P00352;P05091;P30837;P47895	P00352;O94788;P47895;P30837;P05091	Retinal dehydrogenase 1	SASP	NA	altered	NA	2	2	2	2	2	2	2	2	2	2	2	2	2	2	2	2	2	2
		18.9833	19.5642	20.3626	19.4562	18.6411	18.8521	18.9756	19.6574	19.7772	19.6291	18.9328	19.3847	18.892	19.2756	19.1041	18.6916	19.3149	19.0803	18.6741	19.0434	ALDH1A1.1	ALDH1A1;ALDH2	AL1A1_HUMAN;ALDH2_HUMAN	P00352;P05091	P00352;P05091	Retinal dehydrogenase 1	NA	NA	NA	NA	2	2	1	2	2	2	2	2	2	2	2	2	2	2	2	2	2	2
		14.5534	14.3117	14.36	14.3153	14.5483	14.6159	14.7317	14.5605	14.6449	14.8311	14.5238	14.5482	14.4878	14.4662	14.5592	14.6822	14.6394	14.6979	14.6261	14.6982	ALDH1A3.1	ALDH1A3	AL1A3_HUMAN	P47895	P47895	Aldehyde dehydrogenase family 1 member A3	NA	NA	NA	NA	20	27	24	27	24	29	24	30	27	27	24	23	24	25	23	27	24	24
		15.4792	15.8723	15.9607	15.9538	15.8684	15.7867	15.9428	15.9808	15.7285	15.9437	15.8199	15.8704	15.9778	15.9422	15.8031	15.9535	16.0118	15.881	15.8108	15.8032	ALDH1A3	ALDH1A3;ALDH1B1	AL1A3_HUMAN;AL1B1_HUMAN	P30837;P47895	P47895;P30837	Aldehyde dehydrogenase X, mitochondrial	SASP	NA	altered	NA	1	1	1	1	1	1	1	1	1	1	1	1	1	1	1	1	1	1
		16.5297	16.5768	16.6234	16.611	16.5547	16.5142	16.5992	16.6301	16.7137	16.5752	16.5805	16.6855	16.6304	16.5938	16.5902	16.549	16.6521	16.6537	16.5913	16.6422	ALDH1B1	ALDH1B1	AL1B1_HUMAN	P30837	P30837	Aldehyde dehydrogenase X, mitochondrial	SASP	NA	altered	NA	34	32	35	35	34	33	33	31	32	32	31	31	31	30	29	31	30	31
		13.4014	13.6604	13.2158	13.1866	13.1939	13.2501	13.366	13.3938	13.4757	13.4738	13.8173	13.7391	13.9232	13.6713	13.3628	13.7558	13.5232	13.4782	13.732	13.4488	ALDH1L1	ALDH1L1	AL1L1_HUMAN	O75891	O75891	Cytosolic 10-formyltetrahydrofolate dehydrogenase	NA	NA	NA	NA	2	4	4	4	3	4	2	3	5	2	2	3	3	2	3	2	4	2
		17.5032	17.5451	17.3532	17.5267	17.5092	17.4542	17.4438	17.5148	17.5728	17.5261	17.6482	17.7711	17.8416	17.8479	17.7372	17.7621	17.7672	17.7147	17.6781	17.7714	ALDH1L1.1	ALDH1L1;ALDH1L2	AL1L1_HUMAN;AL1L2_HUMAN	O75891;Q3SY69	O75891;Q3SY69	Cytosolic 10-formyltetrahydrofolate dehydrogenase	SASP	NA	up	NA	8	8	7	8	8	7	8	8	7	8	8	8	8	8	7	8	8	8
		17.5526	17.6152	17.7568	17.7866	17.6774	17.6437	17.5311	17.6071	17.6874	17.7303	17.7287	17.7994	17.786	17.7374	17.6825	17.8034	17.7315	17.6723	17.612	17.6562	ALDH1L2	ALDH1L2	AL1L2_HUMAN	Q3SY69	Q3SY69	Mitochondrial 10-formyltetrahydrofolate dehydrogenase	SASP	NA	up	NA	65	68	68	69	63	69	68	70	68	69	70	67	67	70	69	70	70	71
		11.1517	9.89798	10.3279	9.9072	11.2369	10.6346	11.0011	10.5022	10.9014	10.5683	11.8768	11.5381	11.5777	11.0897	11.598	11.2884	11.2041	10.9756	11.0035	11.0914	ALDH3A1	ALDH3A1	AL3A1_HUMAN	P30838	P30838	Aldehyde dehydrogenase, dimeric NADP-preferring	NA	NA	NA	NA	1	2	1	2	0	2	2	2	1	1	2	3	3	3	3	3	4	3
		14.4513	14.2811	14.1955	14.0641	14.4925	14.4401	14.625	14.6677	14.4595	14.4954	14.7707	14.9259	14.7916	15.0155	14.9688	14.8486	14.872	14.8511	14.931	14.8854	ALDH3A1.1	ALDH3A1;ALDH3A2;ALDH3B1	AL3A1_HUMAN;AL3A2_HUMAN;AL3B1_HUMAN	P30838;P43353;P51648	P30838;P51648;P43353;P48448	Aldehyde dehydrogenase, dimeric NADP-preferring	NA	NA	NA	NA	1	1	1	1	1	1	1	1	1	1	1	1	1	1	1	1	1	1
		16.0072	16.0449	16.2251	16.2648	16.1515	16.1488	16.2334	16.162	16.2149	16.1099	16.4223	16.4147	16.3694	16.3679	16.3074	16.3415	16.3763	16.1936	16.2051	16.2682	ALDH3A2	ALDH3A2	AL3A2_HUMAN	P51648	P51648	Aldehyde dehydrogenase family 3 member A2	NA	NA	NA	NA	17	20	20	18	21	20	20	19	20	21	18	18	20	16	17	19	16	19
		14.3258	14.4278	14.4041	14.5045	14.5939	14.45	14.3604	14.4551	14.5504	14.43	14.3872	14.4432	14.3882	14.443	14.4471	14.4744	14.3844	14.2556	14.2127	14.3498	ALDH3B1	ALDH3B1	AL3B1_HUMAN	P43353	P43353	Aldehyde dehydrogenase family 3 member B1	NA	NA	NA	NA	12	10	11	11	11	12	10	11	11	10	11	10	11	12	11	12	12	12
		15.1878	15.3134	15.2601	15.2544	15.2007	15.1498	15.1764	15.2054	15.2782	15.1653	15.1523	15.1705	15.0661	15.0343	15.0069	15.1431	15.0672	15.057	14.991	15.0459	ALDH4A1	ALDH4A1	AL4A1_HUMAN	P30038	P30038	Delta-1-pyrroline-5-carboxylate dehydrogenase, mitochondrial	NA	NA	NA	NA	22	27	28	28	27	30	26	25	29	29	26	28	29	28	26	28	28	28
		17.7779	17.8667	17.806	17.7642	17.8632	17.8505	17.829	17.8984	17.8686	17.9009	17.738	17.8933	17.8511	17.7598	17.7517	17.8782	17.8705	17.8064	17.735	17.8066	ALDH7A1	ALDH7A1	AL7A1_HUMAN	P49419	P49419	Alpha-aminoadipic semialdehyde dehydrogenase	NA	NA	NA	NA	39	42	38	39	39	42	41	38	42	43	38	40	41	41	43	42	40	44
		18.2426	18.3539	18.2916	18.2788	18.3015	18.2914	18.3604	18.2521	18.2666	18.4301	18.2622	18.4373	18.3164	18.3024	18.1935	18.2252	18.2874	18.2789	18.2567	18.3243	ALDH9A1	ALDH9A1	AL9A1_HUMAN	P49189	P49189	4-trimethylaminobutyraldehyde dehydrogenase	NA	NA	NA	NA	46	44	41	43	44	44	46	43	46	46	43	45	44	44	45	43	45	45
		10.7828	9.74478	9.53717	9.75473	9.79229	9.63497	9.79204	9.81655	9.8529	10.0996	9.5707	9.72769	9.84372	9.78144	10.5302	9.57778	9.80594	9.5765	10.1802	9.44994	GPT2	GPT2	ALAT2_HUMAN	Q8TD30	Q8TD30	Alanine aminotransferase 2	NA	NA	NA	NA	1	2	1	2	1	2	1	1	1	1	1	1	1	2	1	1	1	1
		17.6989	17.5921	17.8739	18.144	17.8538	17.7437	17.5181	17.3884	17.6247	17.9126	17.7818	17.5288	17.9514	17.8609	17.5364	17.7491	17.5861	17.0771	17.1811	17.2316	ALB	ALB	ALBU_HUMAN	P02768	P02768	Albumin	SASP	NA	altered	NA	26	24	32	30	31	27	26	27	27	28	27	19	29	29	25	27	25	22
		16.5364	16.7507	16.7553	16.8699	16.7963	16.7221	16.709	16.7769	16.8612	16.7885	16.731	16.7965	16.8174	16.7163	16.594	16.7506	16.6318	16.634	16.4621	16.6367	ALDH2	ALDH2	ALDH2_HUMAN	P05091	O94788;P05091	Aldehyde dehydrogenase, mitochondrial	NA	NA	NA	NA	27	30	30	29	29	30	28	30	29	29	28	30	29	29	28	30	29	28
		20.3791	20.3508	20.3322	20.3797	20.3043	20.2905	20.2032	20.2742	20.3481	20.4386	20.3715	20.5908	20.4852	20.4994	20.4755	20.4021	20.4923	20.4633	20.3876	20.4174	ALDOA	ALDOA	ALDOA_HUMAN	P04075	P04075	Fructose-bisphosphate aldolase A	SASP	NA	altered	NA	69	69	70	69	68	69	68	67	68	69	69	65	66	68	65	63	64	63
		15.5073	15.6784	15.6473	15.704	15.706	15.6456	15.8406	15.3174	15.5448	16.0169	16.1746	16.5052	16.1511	16.1208	16.1792	16.1607	16.0853	16.3593	16.3071	16.073	ALDOA.1	ALDOA;ALDOC	ALDOA_HUMAN;ALDOC_HUMAN	P04075;P09972	P04075;P09972	Fructose-bisphosphate aldolase A	SASP	NA	altered	NA	8	8	7	8	8	8	7	7	8	8	8	8	8	8	8	7	7	8
		15.4474	15.7503	15.8466	15.8292	15.7319	15.6208	15.6093	15.7194	15.7806	15.7965	15.5782	15.698	15.6199	15.4905	15.5076	15.6721	15.5092	15.4545	15.4413	15.5243	ALDOC	ALDOC	ALDOC_HUMAN	P09972	P09972	Fructose-bisphosphate aldolase C	SASP	NA	altered	NA	20	23	23	23	23	23	22	23	23	23	19	21	22	22	20	22	19	20
		18.3179	18.3601	18.4858	18.5347	18.4667	18.4849	18.3637	18.3986	18.4376	18.5658	18.7695	19.0309	18.8632	18.8139	18.7904	18.875	18.8195	18.9039	18.9548	18.9615	AKR1B1	AKR1B1	ALDR_HUMAN	P15121	P15121	Aldo-keto reductase family 1 member B1	SASP	NA	up	NA	31	36	36	34	35	36	34	35	34	34	32	33	34	35	35	35	33	33
		14.9707	14.9127	14.7138	14.7092	14.9647	14.8701	14.9534	14.9625	14.8931	14.9501	15.1336	15.1515	15.1695	15.1201	14.94	15.0239	15.1289	15.0889	15.0418	15.112	ALG1	ALG1	ALG1_HUMAN	Q9BT22	Q9BT22	Chitobiosyldiphosphodolichol beta-mannosyltransferase	NA	NA	NA	NA	14	15	14	12	14	14	14	14	14	14	14	14	15	15	13	15	14	13
		15.703	15.7196	15.5867	15.6713	15.7648	15.6745	15.7819	15.8496	15.5729	15.7971	16.0581	16.0615	16.0122	15.928	16.0146	16.0391	15.9612	15.9155	15.844	15.9183	ALG11	ALG11	ALG11_HUMAN	Q2TAA5	Q2TAA5	GDP-Man:Man(3)GlcNAc(2)-PP-Dol alpha-1,2-mannosyltransferase	NA	NA	NA	NA	11	10	10	10	10	11	10	10	11	11	10	10	11	11	11	11	10	11
		13.3798	13.4676	13.5617	13.428	13.7132	13.4795	13.4106	13.3937	13.534	13.613	13.2905	13.4943	13.4441	13.3237	13.2084	13.7368	13.3739	13.288	13.3987	13.3747	ALG12	ALG12	ALG12_HUMAN	Q9BV10	Q9BV10	Dol-P-Man:Man(7)GlcNAc(2)-PP-Dol alpha-1,6-mannosyltransferase	NA	NA	NA	NA	4	4	4	4	4	5	4	5	5	4	5	5	5	5	5	4	5	5
		13.4796	13.1956	13.2836	13.1758	13.1123	13.1045	13.5808	13.5125	13.0474	13.2158	13.457	13.5395	13.4015	13.4476	13.3796	13.3669	13.2606	13.3228	13.5777	13.4892	ALG13	ALG13	ALG13_HUMAN	Q9NP73	Q9NP73	Putative bifunctional UDP-N-acetylglucosamine transferase and deubiquitinase ALG13	NA	NA	NA	NA	6	7	5	7	7	6	7	5	7	6	8	8	7	6	5	6	7	7
		13.5478	13.4489	13.5076	13.3652	13.2806	13.3381	13.4653	13.448	13.1194	13.3256	13.5767	13.3442	13.3313	13.6031	13.5284	13.5451	13.6099	13.5456	13.2936	12.9901	ALG14	ALG14	ALG14_HUMAN	Q96F25	Q96F25	UDP-N-acetylglucosamine transferase subunit ALG14 homolog	NA	NA	NA	NA	4	4	4	3	5	5	4	5	5	5	5	5	5	5	5	4	5	5
		16.3407	16.0231	15.8816	16.0359	16.0405	16.1901	16.2368	16.2253	16.1319	16.304	16.6526	16.7598	16.7154	16.7226	16.7928	16.6215	16.7228	16.8497	16.6497	16.6913	ALG2	ALG2	ALG2_HUMAN	Q9H553	Q9H553	Alpha-1,3/1,6-mannosyltransferase ALG2	NA	NA	NA	NA	21	22	22	22	21	21	22	20	21	22	22	22	19	20	19	20	19	18
		13.1684	13.7045	13.5396	13.9085	13.9038	13.7977	13.7973	13.7229	13.763	13.8286	13.4898	13.5688	13.723	13.3874	13.3612	13.7519	13.5912	13.5478	13.6445	13.8634	ALG3	ALG3	ALG3_HUMAN	Q92685	Q92685	Dol-P-Man:Man(5)GlcNAc(2)-PP-Dol alpha-1,3-mannosyltransferase	NA	NA	NA	NA	3	3	3	3	3	3	3	3	3	3	3	3	3	2	2	2	2	2
		15.3389	15.2096	15.1722	15.1781	15.1912	15.3335	15.2679	15.178	15.2088	15.3893	15.4157	15.4571	15.4617	15.4764	15.3849	15.4019	15.3659	15.3358	15.2533	15.2558	ALG5	ALG5	ALG5_HUMAN	Q9Y673	Q9Y673	Dolichyl-phosphate beta-glucosyltransferase	NA	NA	NA	NA	18	18	22	19	20	21	22	22	21	22	22	22	21	23	19	22	22	23
		14.8204	14.5715	14.1462	14.3859	14.3496	14.5312	14.4861	14.6544	14.2812	14.5341	14.8658	14.9117	14.8686	14.94	14.7643	14.7485	14.7712	14.8552	14.8859	14.8262	ALG6	ALG6	ALG6_HUMAN	Q9Y672	Q9Y672	Dolichyl pyrophosphate Man9GlcNAc2 alpha-1,3-glucosyltransferase	NA	NA	NA	NA	4	4	4	4	3	5	5	4	4	2	3	3	4	4	4	3	2	4
		14.5322	14.4627	14.5381	14.2941	14.5807	14.7144	14.7561	14.7662	14.6936	14.6678	14.7022	14.8686	14.9338	14.8146	14.906	15.0541	14.9852	15.0154	14.8086	14.999	ALG8	ALG8	ALG8_HUMAN	Q9BVK2	Q9BVK2	Probable dolichyl pyrophosphate Glc1Man9GlcNAc2 alpha-1,3-glucosyltransferase	NA	NA	NA	NA	4	6	5	5	5	6	4	5	5	6	5	6	5	6	5	6	6	6
		14.518	14.4212	14.7353	14.6518	14.7474	14.6323	14.6614	14.5508	14.7612	14.7683	14.747	14.843	14.6469	14.7051	14.7251	14.7353	14.8068	14.786	14.7568	14.7299	ALG9	ALG9	ALG9_HUMAN	Q9H6U8	Q9H6U8	Alpha-1,2-mannosyltransferase ALG9	NA	NA	NA	NA	11	13	12	12	13	13	11	13	13	12	12	12	10	11	11	13	11	13
		13.6104	13.9736	13.6577	13.5968	13.667	13.729	13.6718	13.7174	13.5418	13.446	13.5957	13.7271	13.7996	13.6631	13.5882	13.8705	13.6533	13.4203	13.7906	13.7702	ALK	ALK;MAPK7	ALK_HUMAN;MK07_HUMAN	Q13164;Q9UM73	Q9UM73;P29376;Q13164	Mitogen-activated protein kinase 7	NA	NA	NA	NA	1	1	1	1	1	1	1	1	1	1	1	1	1	1	1	1	1	1
		11.0218	10.6287	10.6707	10.4241	10.264	10.9829	11.0838	10.6389	10.5856	10.5945	10.7447	11.0961	10.7501	10.974	10.4735	10.9442	11.0603	10.8605	10.8324	10.3571	ALKBH1	ALKBH1	ALKB1_HUMAN	Q13686	Q13686	Nucleic acid dioxygenase ALKBH1	NA	NA	NA	NA	2	2	2	2	2	2	2	2	2	2	2	2	2	2	2	2	2	2
		11.3105	10.4691	10.9696	11.4508	11.8431	10.9439	11.1582	11.5948	11.2924	11.0314	11.5725	11.6354	11.6354	11.5679	11.5076	11.7619	11.8417	11.9485	11.8844	11.4415	ALKBH2	ALKBH2	ALKB2_HUMAN	Q6NS38	Q6NS38	DNA oxidative demethylase ALKBH2	NA	NA	NA	NA	1	1	2	2	1	2	2	1	2	2	2	1	2	2	1	2	2	2
		12.4983	12.4484	12.3493	12.5934	12.3906	12.4223	12.2743	12.3234	12.2441	12.1342	12.1309	12.2974	12.1489	12.2201	12.3223	12.332	12.2627	12.1392	12.2533	12.2098	ALKBH3	ALKBH3	ALKB3_HUMAN	Q96Q83	Q96Q83	Alpha-ketoglutarate-dependent dioxygenase alkB homolog 3	NA	NA	NA	NA	5	6	6	5	6	5	5	5	5	6	4	5	5	5	6	6	6	6
		11.7162	11.7204	12.0024	12.1116	12.2001	12.1179	11.9109	12.0291	12.044	12.1638	11.8903	11.8346	11.8086	11.7577	11.9928	12.0441	11.8894	11.7531	11.2944	11.7189	ALKBH4	ALKBH4	ALKB4_HUMAN	Q9NXW9	Q9NXW9	Alpha-ketoglutarate-dependent dioxygenase alkB homolog 4	NA	NA	NA	NA	2	3	3	3	3	3	3	3	3	2	2	1	3	3	3	3	3	3
		13.6391	13.5856	13.4049	13.4346	13.5679	13.5117	13.7409	13.6754	13.6381	13.5389	13.6195	13.5987	13.627	13.5202	13.5438	13.6601	13.705	13.6095	13.5822	13.5541	ALKBH5	ALKBH5	ALKB5_HUMAN	Q6P6C2	Q6P6C2	RNA demethylase ALKBH5	NA	NA	NA	NA	12	14	14	15	13	13	14	14	14	14	13	12	13	12	13	12	13	13
		12.8409	13.4906	12.7206	12.9079	12.9581	12.6865	13.1491	13.1306	12.9224	13.0745	12.8494	13.1158	13.0395	12.7064	12.8762	13.0606	12.9766	12.8716	12.8216	12.695	ALKBH6	ALKBH6	ALKB6_HUMAN	Q3KRA9	Q3KRA9	Alpha-ketoglutarate-dependent dioxygenase alkB homolog 6	NA	NA	NA	NA	3	3	3	3	3	4	4	3	3	3	3	3	3	3	2	3	3	4
		11.308	11.3989	11.2935	11.5348	11.2311	11.2011	11.1478	11.2234	11.0816	11.3161	11.0708	11.3179	11.5136	11.6743	11.2491	11.4164	11.6189	11.2372	11.2629	11.3647	ALKBH8	ALKBH8	ALKB8_HUMAN	Q96BT7	Q96BT7	Alkylated DNA repair protein alkB homolog 8	NA	NA	NA	NA	3	4	5	5	4	3	3	4	4	6	3	3	2	1	3	5	3	3
		10.7755	10.3934	10.5416	10.5349	10.46	10.3854	10.7888	10.5076	10.7374	10.5071	10.6885	10.3858	10.8899	10.5637	10.6467	10.5919	10.3716	10.5954	9.99514	10.5868	ALPK1	ALPK1	ALPK1_HUMAN	Q96QP1	Q96QP1	Alpha-protein kinase 1	NA	NA	NA	NA	2	3	3	3	3	3	1	3	3	2	3	3	3	4	3	3	3	4
		12.2563	12.2025	12.2854	12.2975	12.3958	12.2573	12.4108	12.2426	12.3408	12.4071	12.4253	12.266	12.3772	12.4388	12.388	12.0397	12.3592	12.3016	12.0883	12.2641	ALPK2	ALPK2	ALPK2_HUMAN	Q86TB3	Q86TB3	Alpha-protein kinase 2	NA	NA	NA	NA	11	12	11	12	12	12	12	12	10	12	11	10	11	9	8	10	9	9
		12.4088	12.3493	12.0221	11.5339	12.0671	11.9755	12.2992	12.0675	11.7799	12.0262	12.1545	12.4549	11.9501	12.0953	11.8341	12.122	12.0309	12.0851	12.2265	12.0254	GFER	GFER	ALR_HUMAN	P55789	P55789	FAD-linked sulfhydryl oxidase ALR	NA	NA	NA	NA	3	3	3	3	3	3	3	3	3	3	3	3	3	3	3	3	3	3
		15.078	15.3292	15.5481	15.4836	15.3535	15.4863	15.3023	15.3998	15.3355	15.3985	15.2221	15.2644	15.3422	15.1129	15.1764	15.2333	15.0522	15.1309	15.0717	15.0754	ALS2	ALS2	ALS2_HUMAN	Q96Q42	Q96Q42	Alsin	NA	NA	NA	NA	9	9	8	7	8	9	7	10	8	9	10	8	8	7	8	7	6	9
		11.9903	11.4412	10.7321	11.9677	11.711	11.8673	11.7031	11.1302	11.0763	12.0551	11.3237	9.53778	11.8715	9.08647	11.2466	11.7465	11.765	11.5157	11.6515	11.2148	ALX4	ALX4	ALX4_HUMAN	Q9H161	Q9H161	Homeobox protein aristaless-like 4	NA	NA	NA	NA	2	1	0	1	1	1	1	2	2	1	1	0	1	0	1	1	1	1
		12.5217	12.8591	12.6994	12.8946	12.8948	12.8658	12.8528	12.9289	12.9779	12.8859	12.7102	12.92	12.686	12.5669	12.6952	12.758	12.551	12.3738	12.4588	12.5928	AMACR	AMACR	AMACR_HUMAN	Q9UHK6	Q9UHK6	Alpha-methylacyl-CoA racemase	NA	NA	NA	NA	5	8	7	9	9	9	8	9	7	8	8	7	7	7	5	8	6	8
		13.7876	13.5897	13.5823	13.3967	13.637	13.6561	13.7784	13.7574	13.7059	13.7502	13.9012	13.957	13.8551	13.9715	13.9385	14.0577	14.0249	14.1121	14.0949	14.0588	PAM	PAM	AMD_HUMAN	P19021	P19021	Peptidyl-glycine alpha-amidating monooxygenase	SASP	NA	down	NA	16	20	19	18	21	19	22	20	22	22	21	21	21	22	18	21	21	22
		14.1045	14.1811	13.9164	14.1134	14.203	14.0687	14.2115	14.0232	14.1029	14.2357	14.1769	14.1715	14.3894	14.1487	14.3087	14.2507	14.2729	14.3451	14.3056	14.3688	AMFR	AMFR	AMFR_HUMAN	Q9UKV5	Q9UKV5	E3 ubiquitin-protein ligase AMFR	NA	NA	NA	NA	9	8	9	8	8	9	10	10	10	8	10	8	8	8	9	8	7	9
		12.8411	12.902	13.0096	12.9108	12.9682	13.1245	12.9201	12.8686	12.8986	13.0129	12.7689	12.7819	12.9842	12.6052	12.9547	13.0093	12.8375	12.6868	12.6663	12.6203	AMOTL1	AMOTL1	AMOL1_HUMAN	Q8IY63	Q8IY63	Angiomotin-like protein 1	NA	NA	NA	NA	13	14	14	14	15	13	13	13	15	11	14	8	13	10	11	12	10	14
		12.5395	11.7376	11.4685	12.6704	11.7525	12.1996	12.2652	12.4672	11.7452	11.7708	12.8556	12.4022	11.8569	11.8177	10.941	12.2696	11.4343	11.4036	11.7818	11.3876	AMOT.1	AMOT;AMOTL1	AMOL1_HUMAN;AMOT_HUMAN	Q4VCS5;Q8IY63	Q8IY63;Q4VCS5	Angiomotin	NA	NA	NA	NA	1	2	3	4	3	4	2	3	3	3	2	1	2	1	1	2	2	2
		12.1152	11.7474	11.7727	11.7191	12.0225	12.0154	11.9692	11.9326	11.9692	11.8081	11.841	11.969	11.9209	11.7809	11.7767	11.8183	11.7076	11.863	11.8384	11.954	AMOTL2	AMOTL2	AMOL2_HUMAN	Q9Y2J4	Q9Y2J4	Angiomotin-like protein 2	NA	NA	NA	NA	11	12	12	10	11	10	11	12	12	9	7	10	11	11	8	9	10	10
		12.3581	11.9212	12.0749	12.1245	12.2412	12.0622	12.2141	12.2753	11.8527	11.9142	11.6584	11.3215	11.4198	11.784	11.6616	11.5997	12.0045	11.3526	11.4081	11.5807	AMOT	AMOT	AMOT_HUMAN	Q4VCS5	Q4VCS5	Angiomotin	NA	NA	NA	NA	4	6	6	6	6	6	6	7	6	6	4	3	5	5	3	4	4	4
		17.6844	17.8119	17.7865	17.8278	17.828	17.7643	17.7706	17.8188	17.8807	17.9221	17.8727	17.9639	17.9041	17.8048	17.8601	17.8984	17.784	17.7851	17.8115	17.8476	RNPEP	RNPEP	AMPB_HUMAN	Q9H4A4	Q9H4A4	Aminopeptidase B	SASP	NA	up	NA	45	46	49	49	46	45	45	47	47	49	48	47	47	47	45	45	45	49
		16.1713	16.2209	16.1498	16.1372	16.1837	16.2047	16.2026	16.2011	16.2845	16.2108	16.2003	16.2935	16.2771	16.1983	16.1582	16.2659	16.1951	16.2082	16.2421	16.2813	AMPD2.1	AMPD2	AMPD2_HUMAN	Q01433	Q01433	AMP deaminase 2	NA	NA	NA	NA	40	43	42	44	44	41	44	41	45	41	45	41	43	44	43	44	42	43
		13.7597	13.8972	14.3093	14.2706	14.1229	13.5991	13.3865	13.8541	13.9017	13.8342	13.2292	13.5169	13.6442	13.4999	13.6713	13.6875	13.7405	13.4161	12.6163	13.0565	AMPD2	AMPD2;AMPD3	AMPD2_HUMAN;AMPD3_HUMAN	Q01432;Q01433	Q01433;Q01432	AMP deaminase 3	NA	NA	NA	NA	1	1	1	1	1	1	1	1	1	1	1	1	1	1	1	1	1	1
		12.9486	13.0016	12.8923	12.8062	12.975	12.822	12.8561	12.9622	13.0724	12.9845	13.2663	13.2566	13.2839	13.2855	13.2031	13.1339	13.1704	13.1394	13.1204	13.1611	AMPD3	AMPD3	AMPD3_HUMAN	Q01432	Q01432	AMP deaminase 3	NA	NA	NA	NA	10	10	11	11	8	10	12	12	10	10	11	12	13	11	13	10	11	13
		11.2978	11.2907	11.4775	11.529	11.5693	11.5556	11.4411	11.3052	11.8999	11.5603	11.5176	10.6991	10.8992	11.1218	11.0559	11.2084	11.2198	11.0133	11.5437	10.5851	ENPEP	ENPEP	AMPE_HUMAN	Q07075	Q07075	Glutamyl aminopeptidase	NA	NA	NA	NA	3	3	3	3	3	3	3	2	3	3	1	2	2	2	1	3	2	3
		13.4792	13.4718	13.268	13.413	13.4719	13.607	13.5864	13.3479	13.4429	13.2426	12.6595	12.6862	12.8125	12.9724	12.8556	12.7705	12.7788	13.1318	12.8884	13.0837	AMPH.1	AMPH	AMPH_HUMAN	P49418	P49418	Amphiphysin	NA	NA	NA	NA	11	11	11	10	11	11	11	11	11	11	8	10	9	9	9	9	7	10
		14.9121	14.9396	15.2877	15.2104	15.5955	15.1594	15.0752	15.1402	15.1622	15.2847	15.2051	15.134	15.2608	14.8524	15.0327	15.2565	14.9953	15.2541	14.9947	15.0036	AMPH	AMPH;BIN1	AMPH_HUMAN;BIN1_HUMAN	O00499;P49418	P49418;O00499;Q9UBW5	Myc box-dependent-interacting protein 1	NA	NA	NA	NA	2	2	2	2	1	2	2	2	2	2	2	2	2	2	2	2	2	2
		17.1294	17.1863	17.1958	17.2216	17.2167	17.1948	17.206	17.2121	17.2139	17.2472	17.1797	17.2422	17.2219	17.17	17.0969	17.1736	17.1577	17.108	17.172	17.2358	LAP3	LAP3	AMPL_HUMAN	P28838	P28838	Cytosol aminopeptidase	SASP	NA	altered	NA	52	51	54	50	48	52	51	52	49	55	51	55	50	52	51	49	51	51
		19.48	19.5228	19.438	19.4387	19.4677	19.55	19.5494	19.5161	19.6266	19.7303	19.861	19.8617	19.8252	19.8623	19.779	19.8413	19.8267	19.7592	19.8356	19.8639	ANPEP	ANPEP	AMPN_HUMAN	P15144	P15144	Aminopeptidase N	SASP	NA	altered	NA	95	90	93	93	90	94	95	93	92	94	99	97	98	97	96	97	97	97
		11.7655	11.5272	11.3605	11.8894	11.6873	11.7385	11.6372	11.7276	11.6341	11.552	11.8464	11.8815	11.7701	11.8079	11.5704	11.8067	11.8243	11.6612	11.4216	11.7747	AMBRA1	AMBRA1	AMRA1_HUMAN	Q9C0C7	Q9C0C7	Activating molecule in BECN1-regulated autophagy protein 1	NA	NA	NA	NA	6	5	4	4	5	4	6	5	6	5	6	6	5	6	4	6	5	5
		17.1048	16.9165	16.7073	16.7872	16.8496	16.9676	17.129	17.0785	17.1033	17.0767	17.1981	17.2283	17.2132	17.1881	17.1475	17.1999	17.2057	17.2591	17.2881	17.2992	LRPAP1	LRPAP1	AMRP_HUMAN	P30533	P30533	Alpha-2-macroglobulin receptor-associated protein	NA	NA	NA	NA	37	42	41	41	43	41	39	40	42	43	41	42	42	42	41	39	41	40
		11.7952	12.2936	12.3667	12.2969	12.1482	12.1146	12.0082	12.2439	11.9918	11.8937	11.779	12.0092	11.6197	11.8333	12.1866	12.121	11.8572	11.3898	11.481	11.9469	AMZ2	AMZ2	AMZ2_HUMAN	Q86W34	Q86W34	Archaemetzincin-2	NA	NA	NA	NA	5	5	6	5	6	6	5	5	6	5	6	6	4	6	4	8	5	5
		16.4578	16.5195	16.4679	16.5789	16.5628	16.4831	16.5524	16.5717	16.6168	16.4317	16.2265	16.3659	16.1631	16.313	16.2276	16.3239	16.2525	16.297	16.3029	16.3536	ANKRD13A.1	ANKRD13A	AN13A_HUMAN	Q8IZ07	Q8IZ07	Ankyrin repeat domain-containing protein 13A	NA	NA	NA	NA	35	35	38	39	41	40	39	40	42	41	34	34	37	37	37	35	36	38
		16.5269	16.2696	16.1172	15.9228	16.193	16.3324	16.3528	16.3369	16.212	16.1631	15.9758	15.9577	15.6247	15.7389	15.6825	14.5453	14.6349	14.1359	14.405	15.8374	ANKRD13A	ANKRD13A;ANKRD13D	AN13A_HUMAN;AN13D_HUMAN	Q6ZTN6;Q8IZ07	Q8IZ07;Q6ZTN6	Ankyrin repeat domain-containing protein 13D	NA	NA	NA	NA	2	2	2	2	2	2	2	2	2	2	2	2	2	2	2	2	2	2
		12.9816	12.4212	12.3025	12.4196	12.7397	12.8349	12.7368	12.7723	12.7198	12.7988	12.8497	12.6999	12.8653	12.651	12.7079	12.8767	12.6794	12.7135	12.5124	12.6297	ANKRD13D	ANKRD13D	AN13D_HUMAN	Q6ZTN6	Q6ZTN6	Ankyrin repeat domain-containing protein 13D	NA	NA	NA	NA	6	5	4	5	5	5	5	6	6	5	6	5	4	5	4	5	3	5
		17.4795	17.5674	17.4596	17.4652	17.376	17.3995	17.3751	17.4865	17.4997	17.5315	17.5695	17.5576	17.631	17.4379	17.3743	17.5609	17.3577	17.4957	17.5265	17.5282	ANP32A	ANP32A	AN32A_HUMAN	P39687	P39687;O43423	Acidic leucine-rich nuclear phosphoprotein 32 family member A	SASP	NA	down	NA	18	17	17	18	17	19	19	17	17	18	17	17	18	18	17	17	17	17
		15.4306	16.102	15.9053	15.9612	16.058	15.9102	15.815	15.5681	15.5973	16.1539	16.5322	16.547	16.3085	16.3596	16.5263	16.3475	16.5907	16.4997	16.4624	16.6112	ANP32A.1	ANP32A;ANP32B	AN32A_HUMAN;AN32B_HUMAN	P39687;Q92688	P39687;Q92688	Acidic leucine-rich nuclear phosphoprotein 32 family member A	SASP	NA	altered;down	NA	2	3	2	3	3	2	3	2	3	3	3	3	3	3	3	3	3	3
		19.0454	18.9995	18.9827	18.9078	19.1247	19.0067	19.1793	19.138	19.2419	19.1843	19.2049	19.2285	19.1854	19.2249	19.0711	19.2849	19.2254	19.1048	19.057	19.1936	ANP32B	ANP32B	AN32B_HUMAN	Q92688	Q92688	Acidic leucine-rich nuclear phosphoprotein 32 family member B	SASP	NA	altered	NA	13	12	13	13	11	12	12	13	13	13	12	12	13	12	12	12	12	12
		15.0212	15.0552	15.0499	15.0748	14.9534	14.9317	14.8887	14.8053	15.0465	14.9948	14.383	14.6164	14.7078	14.4761	14.5486	14.7616	14.4392	14.6308	14.6229	14.3587	ANP32E	ANP32E	AN32E_HUMAN	Q9BTT0	Q9BTT0	Acidic leucine-rich nuclear phosphoprotein 32 family member E	NA	NA	NA	NA	9	11	11	10	10	10	10	10	10	11	10	10	11	10	11	11	11	10
		13.4578	12.4309	12.9081	12.5569	13.0261	13.0355	13.0782	12.9068	13.2732	12.6667	9.21606	13.1446	13.0406	13.4577	13.124	12.7085	12.6127	13.2164	12.8605	12.6675	ANKRD34C	ANKRD34C	AN34C_HUMAN	P0C6C1	P0C6C1	Ankyrin repeat domain-containing protein 34C	NA	NA	NA	NA	3	3	2	2	3	2	2	1	2	3	0	2	3	1	3	1	1	2
		15.1988	15.2281	15.2179	15.305	15.3211	15.3507	15.4169	15.533	15.5382	15.5876	15.8877	15.934	15.8964	15.7915	15.8817	15.8402	15.9385	15.7832	15.7983	15.7919	NAGLU	NAGLU	ANAG_HUMAN	P54802	P54802	Alpha-N-acetylglucosaminidase	SASP	NA	altered	NA	21	24	23	24	25	24	26	26	26	26	25	27	26	25	27	28	25	27
		13.2253	13.2412	13.191	13.2282	13.2993	13.3318	13.0749	13.2025	13.1467	13.2958	13.1856	13.2435	13.2544	13.0626	13.0855	13.3884	13.1403	13.1797	13.2498	13.2937	ANAPC2	ANAPC2	ANC2_HUMAN	Q9UJX6	Q9UJX6	Anaphase-promoting complex subunit 2	NA	NA	NA	NA	13	15	12	14	12	13	15	14	13	14	12	12	14	13	14	13	13	12
		13.7063	13.5498	13.346	13.4835	13.6866	13.804	13.7858	13.6287	13.6621	13.7649	13.6774	13.7681	13.6793	13.544	13.5352	13.6311	13.4894	13.6426	13.6129	13.59	ZFYVE19	ZFYVE19	ANCHR_HUMAN	Q96K21	Q96K21	Abscission/NoCut checkpoint regulator	NA	NA	NA	NA	11	12	11	12	12	12	12	12	12	11	9	10	11	10	11	12	9	11
		10.9144	10.7096	10.3871	10.8834	10.8623	10.9679	10.6037	10.8212	10.9168	10.7785	10.9678	10.3551	10.5947	10.7651	10.6422	10.7766	10.3168	10.6726	10.8541	10.6898	AR	AR	ANDR_HUMAN	P10275	P10275	Androgen receptor	NA	NA	NA	NA	2	2	3	2	2	2	2	2	2	3	2	2	2	2	2	2	2	2
		15.6535	15.5826	15.6973	15.5741	15.6442	15.6343	15.6516	15.6676	15.7172	15.6543	15.748	15.794	15.8352	15.7386	15.811	15.814	15.7298	15.7362	15.8353	15.8408	ANKFY1	ANKFY1	ANFY1_HUMAN	Q9P2R3	Q9P2R3	Rabankyrin-5	NA	NA	NA	NA	44	46	49	48	47	48	49	51	47	48	47	45	48	43	42	44	43	44
		10.9606	11.5053	11.0853	10.6905	11.3915	11.6243	11.3853	11.2471	11.542	11.3976	11.5185	11.412	11.8883	11.9563	11.6291	11.6636	11.6418	11.5183	11.5933	11.5559	ANGEL1	ANGEL1	ANGE1_HUMAN	Q9UNK9	Q9UNK9	Protein angel homolog 1	NA	NA	NA	NA	3	4	2	2	3	3	4	4	3	4	3	3	3	3	3	3	3	4
		12.7464	13.164	13.3772	13.2304	13.1835	13.1424	13.192	13.3836	13.3535	13.1046	12.7327	13.067	12.9102	12.6572	12.4501	12.9334	12.7726	12.6332	12.4229	12.621	ANGEL2	ANGEL2	ANGE2_HUMAN	Q5VTE6	Q5VTE6	Protein angel homolog 2	NA	NA	NA	NA	4	4	6	4	4	4	5	5	5	4	4	5	5	4	5	4	3	6
		14.022	13.8605	13.829	13.9975	14.0542	14.2339	14.0686	14.0874	14.0345	14.221	13.8955	14.005	14.0147	14.0071	13.9408	14.1481	13.984	14.035	14.216	14.0682	ANGPTL2	ANGPTL2	ANGL2_HUMAN	Q9UKU9	Q9UKU9;Q8NI99	Angiopoietin-related protein 2	NA	NA	NA	NA	15	16	18	17	17	17	17	17	16	18	15	14	17	16	15	19	16	16
		13.9191	13.766	13.6377	13.6784	13.8302	13.7579	13.8171	13.7855	13.7644	13.7267	14.0718	14.0599	14.0496	14.0056	14.0201	13.9437	13.8976	13.8552	13.9097	13.8313	ANK1	ANK1	ANK1_HUMAN	P16157	P16157	Ankyrin-1	NA	NA	NA	NA	47	47	46	46	48	48	45	48	48	48	46	48	49	49	44	50	46	50
		11.9819	11.5617	11.0464	11.5993	12.0176	12.0154	11.9501	12.2205	12.1375	12.0499	12.5279	12.6956	12.7151	12.6132	12.5388	12.6156	12.1543	12.2761	12.5146	12.501	ANK1.1	ANK1;ANK2	ANK1_HUMAN;ANK2_HUMAN	P16157;Q01484	P16157;Q01484;Q12955	Ankyrin-1	NA	NA	NA	NA	3	3	3	3	3	3	3	3	3	3	3	3	3	3	3	3	3	3
		14.1286	13.8277	13.8453	13.7319	13.8782	13.9855	14.0555	13.9534	13.8624	13.9151	14.2526	14.1931	14.3	14.1973	14.3035	14.2073	14.1029	14.2352	14.2526	14.2211	ANK2	ANK2	ANK2_HUMAN	Q01484	Q01484	Ankyrin-2	NA	NA	NA	NA	39	40	37	38	40	43	41	43	41	40	44	41	43	42	38	41	44	40
		12.1354	12.1625	12.2722	11.8917	12.38	12.1925	12.1963	12.0261	12.2012	12.3513	12.5223	12.4362	12.5173	12.7515	12.6803	12.4451	12.4849	12.2939	12.2574	12.2831	ANKH	ANKH	ANKH_HUMAN	Q9HCJ1	Q9HCJ1	Progressive ankylosis protein homolog	NA	NA	NA	NA	9	9	8	9	7	9	9	9	7	7	10	9	8	8	9	11	9	8
		13.4553	13.2917	13.2561	13.238	13.2445	13.4437	13.3354	13.2613	13.3446	13.246	13.1459	13.1365	13.2907	13.0008	12.9663	13.1523	12.907	12.9751	13.1156	13.1503	ANKHD1.1	ANKHD1	ANKH1_HUMAN	Q8IWZ3	Q8IWZ3	Ankyrin repeat and KH domain-containing protein 1	NA	NA	NA	NA	21	22	19	21	21	21	21	20	20	21	17	16	18	20	17	19	18	17
		14.4452	14.5441	14.588	14.6819	14.5954	14.5703	14.4013	14.4621	14.5523	14.6095	14.2209	14.1345	14.1327	14.09	13.893	14.3098	14.1271	14.0849	13.9102	14.1473	ANKHD1	ANKHD1;ANKRD17	ANKH1_HUMAN;ANR17_HUMAN	O75179;Q8IWZ3	Q8IWZ3;O75179	Ankyrin repeat domain-containing protein 17	NA	NA	NA	NA	8	11	10	11	11	11	11	11	11	11	10	8	10	10	8	10	7	10
		13.3533	13.1639	13.1054	13.1043	13.1034	13.2709	13.2859	13.1741	13.2835	13.2591	13.4655	13.344	13.3254	13.3151	13.2774	13.2692	13.2408	13.1931	13.2847	13.2054	ANKLE2	ANKLE2	ANKL2_HUMAN	Q86XL3	Q86XL3	Ankyrin repeat and LEM domain-containing protein 2	NA	NA	NA	NA	29	31	29	27	30	29	27	29	29	31	28	30	28	28	28	27	28	28
		12.8866	12.9712	12.8107	12.7915	13.0302	12.991	12.8945	12.98	13.116	13.0555	12.7286	12.7865	12.7331	12.6278	12.448	12.8125	12.4639	12.4256	12.4175	12.4076	ANKS3	ANKS3	ANKS3_HUMAN	Q6ZW76	Q6ZW76	Ankyrin repeat and SAM domain-containing protein 3	NA	NA	NA	NA	4	4	5	4	4	4	5	4	4	4	4	5	4	3	4	3	4	3
		13.4186	13.4232	12.1421	12.5569	13.8454	13.4323	13.662	13.0507	13.6274	13.3563	13.603	13.1126	13.9558	9.55094	14.0233	13.6341	14.0998	13.9319	14.1873	13.9409	ANKS6	ANKS6	ANKS6_HUMAN	Q68DC2	Q68DC2	Ankyrin repeat and SAM domain-containing protein 6	NA	NA	NA	NA	2	2	2	3	2	3	3	3	2	3	2	2	2	0	2	3	2	3
		13.4676	13.4951	13.6259	13.7542	13.7214	13.6421	13.731	13.5762	13.6525	13.4448	13.2838	13.2175	13.342	13.2526	13.2778	13.3226	13.1023	13.202	13.2609	13.1767	ANKMY2	ANKMY2	ANKY2_HUMAN	Q8IV38	Q8IV38	Ankyrin repeat and MYND domain-containing protein 2	NA	NA	NA	NA	12	12	12	11	11	11	10	12	11	12	11	10	11	11	11	11	11	11
		13.6432	13.4955	13.6041	13.6778	13.6115	13.4888	13.6601	13.6052	13.5564	13.4576	13.5922	13.3566	13.4012	13.2931	13.3957	13.3977	13.4035	13.2396	13.2734	13.313	ANKZF1	ANKZF1	ANKZ1_HUMAN	Q9H8Y5	Q9H8Y5	Ankyrin repeat and zinc finger domain-containing protein 1	NA	NA	NA	NA	13	14	13	14	14	13	14	14	14	14	12	13	14	12	10	14	9	13
		12.8246	12.7739	12.5323	12.6179	12.7167	12.2228	12.9407	12.6748	12.3559	13.0561	11.7526	11.6619	11.7873	11.7283	11.9673	12.2829	11.9857	12.1104	12.0915	12.1429	ANLN	ANLN	ANLN_HUMAN	Q9NQW6	Q9NQW6	Anillin	NA	NA	NA	NA	13	11	9	13	10	12	13	13	12	13	7	4	7	3	5	11	8	8
		16.8724	17.0287	16.7432	16.7936	16.8225	16.9445	16.9193	16.9181	17.0256	17.0432	16.887	16.9262	16.8306	16.8074	16.6918	16.8289	16.8223	16.8336	16.8225	16.7805	PRMT1	PRMT1	ANM1_HUMAN	Q99873	Q99873	Protein arginine N-methyltransferase 1	SASP	NA	altered	NA	32	35	36	36	36	36	34	36	36	33	33	34	35	34	32	34	32	33
		12.23	12.0179	12.0884	12.0389	12.2474	12.0216	12.2523	12.2478	12.3923	12.1341	12.2755	12.3545	12.348	12.3937	12.3123	12.5242	12.2315	12.3167	12.363	12.4998	PRMT2	PRMT2	ANM2_HUMAN	P55345	P55345	Protein arginine N-methyltransferase 2	NA	NA	NA	NA	5	4	4	5	5	5	5	5	5	5	5	4	5	4	3	4	3	5
		13.1382	13.2222	12.9457	12.8626	12.9988	13.0507	13.2443	13.0892	13.1439	13.1764	12.765	12.6966	12.8882	12.9308	12.9958	13.2195	13.0781	13.0809	12.9692	12.9654	PRMT3	PRMT3	ANM3_HUMAN	O60678	O60678	Protein arginine N-methyltransferase 3	NA	NA	NA	NA	10	9	7	8	7	8	8	9	10	9	7	6	8	8	7	8	9	7
		15.8972	15.8683	15.9343	15.9581	15.9047	15.8678	15.9254	15.9671	15.9327	15.9943	15.8568	15.9658	15.8708	15.8755	15.7666	15.8478	15.8291	15.8578	15.8385	15.9172	PRMT5	PRMT5	ANM5_HUMAN	O14744	O14744	Protein arginine N-methyltransferase 5	NA	NA	NA	NA	30	34	32	33	31	34	34	30	31	29	32	33	34	32	32	31	31	33
		12.3415	12.2063	12.4508	12.6707	12.5027	12.2792	12.541	12.293	12.208	12.666	12.5246	12.6356	12.5298	12.5725	12.4523	12.7842	12.864	12.5824	12.5223	12.7788	PRMT6	PRMT6	ANM6_HUMAN	Q96LA8	Q96LA8	Protein arginine N-methyltransferase 6	NA	NA	NA	NA	2	2	3	1	2	2	2	2	2	2	2	2	3	2	2	2	3	2
		11.7337	11.656	11.9251	11.6658	11.7375	11.3665	11.8595	12.0194	12.1245	11.9693	11.3093	11.6287	11.5805	11.6078	11.8683	11.5185	11.8521	11.6703	11.6994	11.7022	PRMT7	PRMT7	ANM7_HUMAN	Q9NVM4	Q9NVM4	Protein arginine N-methyltransferase 7	NA	NA	NA	NA	3	4	2	4	4	4	3	3	3	3	5	3	4	4	3	3	3	3
		12.8731	12.7468	12.72	12.8681	12.7622	12.8607	12.9185	12.9183	12.7809	12.841	12.9926	12.8293	12.8053	12.869	12.7618	12.8798	12.8335	12.8911	12.9681	12.9703	PRMT9	PRMT9	ANM9_HUMAN	Q6P2P2	Q6P2P2	Protein arginine N-methyltransferase 9	NA	NA	NA	NA	9	10	8	8	8	10	10	9	7	9	9	9	10	8	8	10	9	8
		15.7083	15.6804	15.4683	15.6707	15.825	15.7097	15.8339	15.8466	15.8224	15.8588	15.9064	16.0954	15.9936	15.9822	15.9885	16.0103	16.0822	16.0012	15.9809	16.064	ANO10	ANO10	ANO10_HUMAN	Q9NW15	Q9NW15	Anoctamin-10	NA	NA	NA	NA	34	37	34	33	34	33	33	32	36	36	36	35	36	36	36	35	34	36
		15.1261	15.0636	14.86	14.9031	15.1676	15.1577	15.0804	15.1151	15.2137	15.2386	15.4452	15.5619	15.4081	15.4866	15.4384	15.4292	15.3668	15.3342	15.2733	15.3423	ANO6	ANO6	ANO6_HUMAN	Q4KMQ2	Q4KMQ2	Anoctamin-6	NA	NA	NA	NA	37	36	40	40	35	38	39	38	38	40	34	37	39	39	40	39	36	40
		14.085	14.0859	13.9859	13.9653	14.08	14.1449	14.146	14.1452	14.0607	13.9839	14.0529	13.9174	13.9686	13.9299	14.0255	14.0827	14.0145	13.893	13.9625	13.8853	NPR2	NPR2	ANPRB_HUMAN	P20594	P20594	Atrial natriuretic peptide receptor 2	NA	NA	NA	NA	26	27	26	29	28	30	29	28	29	28	25	30	29	26	28	29	24	29
		10.955	11.0492	11.1467	10.8167	10.7135	11.1349	10.9119	11.0294	10.9767	10.5435	11.1035	11.5777	11.1746	11.0609	10.993	10.9341	10.9358	10.7462	10.4504	10.6013	ANKRD11	ANKRD11	ANR11_HUMAN	Q6UB99	Q6UB99	Ankyrin repeat domain-containing protein 11	NA	NA	NA	NA	3	5	5	4	4	3	4	4	4	4	2	3	3	5	3	6	4	3
		11.6707	11.5887	12.0743	12.4546	11.5813	11.7172	11.2214	11.6188	11.2073	11.6988	11.5354	11.7029	11.8337	11.1803	11.833	11.6267	10.8161	10.5656	11.0366	11.1696	ANKRD16	ANKRD16	ANR16_HUMAN	Q6P6B7	Q6P6B7	Ankyrin repeat domain-containing protein 16	NA	NA	NA	NA	2	2	2	2	2	2	2	2	2	2	2	1	2	1	1	1	1	1
		14.3615	14.0508	13.8738	13.9919	14.0447	14.1215	14.1961	14.0537	14.0869	14.1355	14.2369	14.133	14.2001	14.1734	14.0988	14.2338	14.0863	14.1097	14.0875	14.1686	ANKRD17	ANKRD17	ANR17_HUMAN	O75179	O75179	Ankyrin repeat domain-containing protein 17	NA	NA	NA	NA	23	27	26	27	25	24	26	26	26	28	24	25	27	28	20	26	24	24
		12.113	12.0441	12.2067	12.1234	12.0843	12.0468	12.1403	12.0737	12.175	12.1992	11.9915	12.0322	12.2499	12.2202	12.0274	12.2665	11.9379	12.0529	12.2969	12.3015	ANKRD27	ANKRD27	ANR27_HUMAN	Q96NW4	Q96NW4	Ankyrin repeat domain-containing protein 27	NA	NA	NA	NA	10	11	7	9	8	9	10	11	12	12	10	8	9	10	9	11	11	11
		13.3181	13.126	12.9512	12.9971	13.0138	13.1778	13.2502	13.2009	13.0436	13.3023	13.2498	13.1181	13.1574	13.1078	13.1165	13.1689	13.1444	13.2328	13.3107	13.2597	ANKRD28	ANKRD28	ANR28_HUMAN	O15084	O15084	Serine/threonine-protein phosphatase 6 regulatory ankyrin repeat subunit A	NA	NA	NA	NA	25	26	26	26	26	27	26	26	26	26	24	26	27	27	27	26	24	25
		12.9756	12.9507	12.5758	12.9649	13.0245	13.0119	13.1616	13.2421	13.3936	13.3044	13.1251	13.4052	13.0746	13.3219	13.1354	13.1588	12.9848	13.1363	13.2661	13.4563	ANKRD28.1	ANKRD28;ANKRD44	ANR28_HUMAN;ANR44_HUMAN	O15084;Q8N8A2	O15084;Q8N8A2	Serine/threonine-protein phosphatase 6 regulatory ankyrin repeat subunit A	NA	NA	NA	NA	3	3	3	3	3	3	3	3	3	3	3	3	3	3	3	3	3	3
		12.6164	12.5374	12.2888	12.4654	12.6026	12.941	12.9735	12.9172	12.7487	12.6607	12.6406	12.3924	12.3068	12.4339	12.1319	12.4386	12.4161	12.3582	12.474	12.6063	ANKRD29	ANKRD29	ANR29_HUMAN	Q8N6D5	Q8N6D5	Ankyrin repeat domain-containing protein 29	NA	NA	NA	NA	6	7	5	7	7	7	7	6	8	7	7	6	6	6	6	7	5	6
		11.9039	11.6034	11.6855	11.6017	11.7432	11.8525	11.5729	11.4822	11.7886	11.3798	11.8079	11.5925	11.8764	11.5171	11.7885	11.8303	11.6158	11.6501	11.5492	11.6987	ANKRD35	ANKRD35	ANR35_HUMAN	Q8N283	Q8N283	Ankyrin repeat domain-containing protein 35	NA	NA	NA	NA	2	5	5	6	6	6	5	5	7	7	7	6	6	7	7	7	5	7
		11.174	10.6261	10.6759	10.6843	10.695	10.7211	10.4054	10.8754	10.8592	11.0951	11.0643	11.2462	11.0593	11.122	10.9464	11.0147	10.2554	10.4856	11.0476	11.1112	ANKRD40	ANKRD40	ANR40_HUMAN	Q6AI12	Q6AI12	Ankyrin repeat domain-containing protein 40	NA	NA	NA	NA	3	3	3	3	3	3	3	3	3	3	1	2	3	4	4	2	1	2
		12.5866	12.4945	12.6538	12.5633	12.4949	12.5255	12.7646	12.6554	12.4735	12.5048	12.3906	12.697	12.5189	12.6555	12.2934	12.5663	12.5975	12.5945	12.6581	12.5232	ANKRD44	ANKRD44	ANR44_HUMAN	Q8N8A2	Q8N8A2	Serine/threonine-protein phosphatase 6 regulatory ankyrin repeat subunit B	NA	NA	NA	NA	12	12	13	13	13	14	13	14	11	13	11	9	12	10	9	10	10	10
		11.2384	10.0634	11.028	10.5015	11.0816	11.0636	11.4542	11.0156	11.0455	10.999	11.1122	10.8465	10.9053	10.6673	10.8945	11.2015	10.8483	11.1003	11.0854	11.1911	ANKRD49	ANKRD49	ANR49_HUMAN	Q8WVL7	Q8WVL7	Ankyrin repeat domain-containing protein 49	NA	NA	NA	NA	2	3	1	3	2	2	1	2	2	3	3	3	2	2	3	3	3	2
		12.2755	12.2512	12.2597	12.4575	12.374	12.4102	12.2434	12.2066	12.1144	12.1988	12.0515	12.0384	12.0864	11.7349	12.0168	12.0876	12.0687	11.8753	12.0134	12.078	ANKRD50	ANKRD50	ANR50_HUMAN	Q9ULJ7	Q9ULJ7	Ankyrin repeat domain-containing protein 50	NA	NA	NA	NA	14	14	13	13	13	13	14	14	12	11	11	10	12	9	9	11	10	11
		12.3357	11.7424	12.0324	12.0389	11.701	11.8422	12.1854	11.8072	12.1366	12.196	12.393	12.3822	12.2207	12.5459	12.3782	12.241	11.8953	12.2064	11.6253	11.7275	ANKRD52	ANKRD52	ANR52_HUMAN	Q8NB46	Q8NB46	Serine/threonine-protein phosphatase 6 regulatory ankyrin repeat subunit C	NA	NA	NA	NA	4	4	5	4	4	5	4	5	5	4	5	5	5	4	4	4	5	4
		12.8372	12.9269	12.6965	12.489	12.8165	13.0968	13.0422	12.9809	12.8961	12.8495	12.6134	13.0495	13.0645	12.6771	12.6077	13.1112	12.7094	12.9513	12.6002	12.9584	ANKRD54	ANKRD54	ANR54_HUMAN	Q6NXT1	Q6NXT1	Ankyrin repeat domain-containing protein 54	NA	NA	NA	NA	3	3	3	3	3	3	3	3	3	3	3	3	3	3	3	3	3	3
		14.4508	14.3575	14.2985	14.2607	14.2748	14.5194	14.5546	14.3542	14.4813	14.3127	14.4027	14.3389	14.4324	14.3349	14.4504	14.4213	14.3431	14.381	14.3973	14.4334	ANKS1A	ANKS1A	ANS1A_HUMAN	Q92625	Q92625	Ankyrin repeat and SAM domain-containing protein 1A	NA	NA	NA	NA	18	19	20	21	21	22	19	22	21	22	19	20	20	23	20	17	19	21
		13.7711	13.046	13.1441	12.9496	13.5222	13.0998	13.4758	13.0776	13.1936	13.7126	13.55	13.3706	13.4017	13.5873	13.4166	13.2531	13.6509	12.7389	13.3321	13.3782	SERPINC1	SERPINC1	ANT3_HUMAN	P01008	P01008	Antithrombin-III	SASP	NA	down	NA	7	6	6	5	5	6	7	7	8	11	11	7	11	7	5	6	6	5
		14.5882	14.6069	14.5887	14.551	14.5109	14.6552	14.6019	14.7149	14.6543	14.465	14.6613	14.9093	14.7759	14.817	14.7325	14.8784	14.9341	14.8837	14.8049	14.8973	ANTXR1.1	ANTXR1	ANTR1_HUMAN	Q9H6X2	Q9H6X2	Anthrax toxin receptor 1	NA	NA	NA	NA	13	15	15	17	17	14	16	13	16	14	15	17	16	16	17	14	16	16
		13.401	13.1827	13.0776	13.3551	13.4401	13.5203	13.7824	13.5974	13.6619	13.7033	13.9191	13.8602	13.9635	13.9553	14.2454	14.2192	14.0707	14.0981	14.3375	14.3696	ANTXR1	ANTXR1;ANTXR2	ANTR1_HUMAN;ANTR2_HUMAN	P58335;Q9H6X2	Q9H6X2;P58335	Anthrax toxin receptor 2	NA	NA	NA	NA	1	1	1	1	1	1	1	1	1	1	1	1	1	1	1	1	1	1
		14.4249	14.5277	14.6412	14.6631	14.7671	14.5764	14.7418	14.6253	14.7448	14.7395	14.338	14.4195	14.2642	14.2906	14.3102	14.3891	14.4617	14.4046	14.3558	14.3953	ANTXR2	ANTXR2	ANTR2_HUMAN	P58335	P58335	Anthrax toxin receptor 2	NA	NA	NA	NA	10	12	11	13	11	13	12	12	12	12	10	11	12	12	12	10	9	10
		10.7888	10.8341	10.4999	10.7426	10.5262	10.7681	10.8037	10.7773	10.0722	9.88102	10.599	10.2393	10.574	9.35536	10.6413	10.7541	10.4809	9.52755	9.64175	10.6047	ANXA10	ANXA10	ANX10_HUMAN	Q9UJ72	Q9UJ72	Annexin A10	NA	NA	NA	NA	1	1	1	1	1	1	1	1	1	1	1	1	0	0	1	1	1	1
		17.284	17.3977	17.2897	17.1897	17.3184	17.3999	17.2894	17.2195	17.5122	17.3798	17.0095	17.0357	17.1328	17.0266	16.9934	17.0887	17.0015	17.0892	17.0437	17.0784	ANXA11	ANXA11	ANX11_HUMAN	P50995	P50995	Annexin A11	SASP	NA	altered	NA	38	39	39	39	39	38	39	37	38	38	37	38	38	38	38	38	37	38
		20.3646	20.2992	20.1478	20.3041	20.2621	20.2799	20.2891	20.2212	20.313	20.3624	20.4685	20.5207	20.5277	20.4769	20.4686	20.4248	20.4805	20.4312	20.3476	20.3303	ANXA1	ANXA1	ANXA1_HUMAN	P04083	P04083	Annexin A1	SASP	NA	altered	NA	63	63	64	64	64	62	62	62	63	64	62	64	64	64	64	63	61	63
		20.7354	20.6212	20.6579	20.7624	20.5209	20.6058	20.4747	20.5588	20.5631	20.6504	20.527	20.6699	20.6128	20.6076	20.5169	20.4539	20.7151	20.5555	20.4099	20.4836	ANXA2	ANXA2	ANXA2_HUMAN	P07355	P07355;A6NMY6	Annexin A2	SASP	NA	altered	NA	98	96	99	97	96	100	89	91	96	98	90	96	95	97	93	92	96	94
		15.6838	15.6995	15.7816	15.8333	15.9261	15.9567	15.9253	15.9674	15.9903	15.9545	15.3623	15.4537	15.4829	15.5616	15.5012	15.5037	15.4414	15.4215	15.4356	15.4908	ANXA3	ANXA3	ANXA3_HUMAN	P12429	P12429	Annexin A3	SASP	NA	altered	NA	20	21	20	22	23	21	19	21	22	21	17	18	21	19	19	18	19	20
		18.1876	18.2044	18.2081	18.1187	18.2695	18.249	18.2924	18.3106	18.3231	18.3415	18.5876	18.6518	18.5684	18.4913	18.4083	18.4978	18.4213	18.4024	18.3716	18.4133	ANXA4	ANXA4	ANXA4_HUMAN	P09525	P09525	Annexin A4	SASP	NA	down	NA	38	38	38	36	37	38	38	36	37	38	37	38	38	38	38	38	37	37
		19.813	19.8147	19.8421	19.9286	19.7396	19.8221	19.7183	19.7915	19.839	19.9539	19.8793	19.9834	19.963	19.9333	19.8822	19.8318	19.9371	19.8178	19.6438	19.7081	ANXA5	ANXA5	ANXA5_HUMAN	P08758	P08758	Annexin A5	SASP	NA	altered	NA	56	58	60	58	57	59	55	57	59	58	58	60	59	58	58	58	57	55
		19.8056	19.8453	19.7054	19.7604	19.7428	19.7591	19.7617	19.7948	19.9055	19.9102	19.802	19.9036	19.8425	19.8267	19.7873	19.8184	19.8585	19.8248	19.8011	19.8185	ANXA6	ANXA6	ANXA6_HUMAN	P08133	P08133	Annexin A6	SASP	NA	altered	NA	98	100	99	101	93	98	99	96	98	100	98	100	101	100	97	97	101	97
		17.6435	17.5926	17.3603	17.4015	17.5957	17.5894	17.6877	17.5309	17.7422	17.6656	17.7035	17.6828	17.6952	17.652	17.6987	17.6617	17.595	17.7419	17.6818	17.6876	ANXA7	ANXA7	ANXA7_HUMAN	P20073	P20073	Annexin A7	SASP	NA	down	NA	32	33	33	31	31	34	35	32	35	36	35	35	36	35	36	36	34	36
		13.8584	13.8289	13.8171	13.8642	14.0192	13.9284	13.8026	13.9314	13.9219	13.7194	13.7334	13.7813	13.7003	13.6367	13.6166	13.5968	13.7251	13.7381	13.6614	13.6074	MAOA	MAOA	AOFA_HUMAN	P21397	P21397	Amine oxidase [flavin-containing] A	NA	NA	NA	NA	14	14	15	15	14	15	14	15	16	14	12	13	13	13	10	14	13	13
		13.3885	13.289	13.9161	13.7904	13.227	13.2382	13.3753	13.6829	13.749	13.4561	13.417	13.6726	13.5872	13.3085	13.6069	13.6017	13.6854	13.5578	13.3657	13.5293	MAOA.1	MAOA;MAOB	AOFA_HUMAN;AOFB_HUMAN	P21397;P27338	P21397;P27338	Amine oxidase [flavin-containing] A	NA	NA	NA	NA	2	2	1	1	2	2	2	2	2	2	2	2	2	2	2	1	2	2
		11.6698	11.5559	11.8496	11.6276	11.8632	11.4381	11.5648	11.4769	11.1328	11.3553	11.4614	11.6973	11.7455	11.6951	11.6322	11.9433	11.6327	11.6558	11.6301	11.8287	MAOB	MAOB	AOFB_HUMAN	P27338	P27338	Amine oxidase [flavin-containing] B	NA	NA	NA	NA	3	3	2	2	3	3	2	3	2	3	3	2	3	3	1	3	2	3
		14.7349	14.773	14.8887	14.8663	14.907	15.0032	14.9001	14.9921	15.0019	14.9502	14.5842	14.6256	14.6532	14.5863	14.5422	14.7885	14.7678	14.7524	14.7018	14.8267	AOX1	AOX1	AOXA_HUMAN	Q06278	Q06278	Aldehyde oxidase	NA	NA	NA	NA	47	48	50	46	51	52	50	51	54	52	51	49	50	52	48	51	47	51
		11.0575	10.544	10.797	11.1947	10.6549	10.5527	11.0887	10.6888	11.031	11.2078	11.2725	10.9772	10.7291	11.5494	11.3454	10.9272	11.2963	11.0156	11.5307	11.2625	AP1AR	AP1AR	AP1AR_HUMAN	Q63HQ0	Q63HQ0	AP-1 complex-associated regulatory protein	NA	NA	NA	NA	3	3	3	3	3	3	3	3	3	3	2	2	3	2	3	3	2	3
		10.9245	9.9615	9.9537	9.77752	10.4261	12.3095	10.1207	12.2211	9.09851	11.9071	11.6026	11.7032	11.9994	12.193	11.4524	12.0705	10.486	12.0011	12.1753	12.1305	AP1AR.1	AP1AR;CCDC127	AP1AR_HUMAN;CC127_HUMAN	Q63HQ0;Q96BQ5	Q63HQ0;Q96BQ5	AP-1 complex-associated regulatory protein	NA	NA	NA	NA	0	0	0	0	0	1	0	1	0	1	1	1	1	1	1	1	0	1
		16.1947	16.5595	16.5175	16.4531	16.6008	16.4731	16.4118	16.4524	16.6357	16.5863	16.3755	16.37	16.3728	16.287	16.3272	16.3223	16.2706	16.2721	16.2932	16.3815	AP1B1.1	AP1B1	AP1B1_HUMAN	Q10567	Q10567	AP-1 complex subunit beta-1	NA	NA	NA	NA	32	33	32	33	32	33	33	31	34	34	31	31	31	30	29	29	31	31
		17.4742	17.3241	17.2898	17.3259	17.3446	17.4247	17.3294	17.1631	17.3335	17.3194	17.2319	17.3166	17.2953	17.2696	17.2987	17.2517	17.2647	17.2185	17.222	17.2786	AP1B1	AP1B1;AP2B1	AP1B1_HUMAN;AP2B1_HUMAN	P63010;Q10567	Q10567;P63010	AP-2 complex subunit beta	SASP	NA	down	NA	34	35	34	32	32	35	35	34	35	34	34	34	30	33	31	32	31	32
		17.2301	17.4189	17.3081	17.2128	17.4363	17.2923	17.2756	17.341	17.3136	17.2881	17.1487	17.2616	17.1745	17.1796	17.1084	17.2217	17.0548	17.1318	17.1346	17.1967	AP1G1	AP1G1	AP1G1_HUMAN	O43747	O43747	AP-1 complex subunit gamma-1	NA	NA	NA	NA	31	33	32	32	32	33	32	30	34	34	30	30	32	32	29	32	29	30
		12.2706	12.5315	12.3286	12.3025	12.3792	12.4164	12.3823	12.2849	12.5452	12.2172	11.9419	11.7997	11.6558	11.8283	11.7252	11.9966	11.7917	11.824	11.6946	11.7061	AP1G2	AP1G2	AP1G2_HUMAN	O75843	O75843	AP-1 complex subunit gamma-like 2	NA	NA	NA	NA	8	9	8	9	9	8	9	9	10	9	7	8	9	8	7	8	6	7
		15.6387	15.7945	15.8526	15.9066	15.8701	15.78	15.8294	15.7843	15.8341	15.8539	15.7584	15.834	15.7651	15.7547	15.7793	15.8073	15.7499	15.7029	15.728	15.8139	AP1M1	AP1M1	AP1M1_HUMAN	Q9BXS5	Q9BXS5	AP-1 complex subunit mu-1	NA	NA	NA	NA	35	36	38	35	37	37	35	36	37	36	32	35	35	35	34	36	36	33
		15.0953	15.3038	14.9934	15.1557	15.1318	15.1659	15.1016	15.2166	15.3096	15.133	15.0831	15.1198	14.9888	15.1346	15.1641	14.9171	15.0205	14.9912	15.0682	15.0132	AP1S1.2	AP1S1	AP1S1_HUMAN	P61966	P61966	AP-1 complex subunit sigma-1A	NA	NA	NA	NA	9	10	10	9	8	8	8	9	8	9	6	8	9	9	7	8	7	9
		13.3879	12.8815	11.9653	12.3751	12.8276	13.082	13.1412	12.4711	11.8603	12.6451	13.1967	13.1695	13.4054	13.2966	13.2041	13.0798	12.9805	13.4824	13.1016	13.1172	AP1S1	AP1S1;AP1S2	AP1S1_HUMAN;AP1S2_HUMAN	P56377;P61966	P61966;P56377	AP-1 complex subunit sigma-2	NA	NA	NA	NA	1	1	1	1	1	1	1	1	1	1	1	1	1	1	1	1	1	1
		13.5398	14.0028	13.8885	13.8057	14.4468	13.7616	13.8829	13.9142	13.7548	14.0445	13.597	14.063	13.9569	13.8439	13.9363	14.0111	13.9337	13.3552	13.7176	13.7368	AP1S1.1	AP1S1;AP1S2;AP1S3	AP1S1_HUMAN;AP1S2_HUMAN;AP1S3_HUMAN	P56377;P61966;Q96PC3	P61966;P56377;Q96PC3	AP-1 complex subunit sigma-2	NA	NA	NA	NA	1	1	1	1	1	1	1	1	1	1	1	1	1	1	1	1	1	1
		14.4106	14.596	14.5693	14.6913	14.5638	14.4996	14.5708	14.5846	14.5339	14.5622	14.231	14.0507	14.2338	14.032	14.176	14.1545	14.3283	14.3303	14.146	14.2589	AP1S2	AP1S2	AP1S2_HUMAN	P56377	P56377	AP-1 complex subunit sigma-2	NA	NA	NA	NA	6	6	6	6	5	6	6	6	6	6	6	6	6	6	6	6	6	6
		12.7072	12.8151	12.7145	12.4894	12.6967	12.8014	12.9902	12.8725	13.2471	13.0334	13.245	13.2247	13.0543	13.1462	13.3601	12.6488	13.0249	13.0797	13.0787	13.085	AP1S3	AP1S3	AP1S3_HUMAN	Q96PC3	Q96PC3	AP-1 complex subunit sigma-3	NA	NA	NA	NA	2	2	2	2	2	2	2	2	2	2	2	2	2	2	2	1	1	2
		10.9068	9.90539	10.3006	10.2025	10.9553	10.4204	10.4797	10.6524	10.1738	10.1758	10.4452	10.8282	10.9531	10.6193	10.6564	10.9482	10.7823	10.6046	10.9506	10.8314	TFAP2A	TFAP2A	AP2A_HUMAN	P05549	P05549	Transcription factor AP-2-alpha	NA	NA	NA	NA	2	1	2	3	2	3	2	2	2	3	3	2	1	2	1	2	1	2
		12.4542	12.0085	12.3851	12.0855	12.4288	12.2413	12.4889	12.2649	12.1543	12.4434	12.3075	12.3336	12.0526	12.1292	12.2637	12.3775	12.5775	12.3566	12.4625	10.8342	TFAP2A.1	TFAP2A;TFAP2C	AP2A_HUMAN;AP2C_HUMAN	P05549;Q92754	P05549;Q92481;Q92754;Q6VUC0	Transcription factor AP-2-alpha	NA	NA	NA	NA	1	1	1	1	1	1	1	1	1	1	1	1	1	1	1	1	1	1
		17.6956	17.6916	17.6347	17.6859	17.6544	17.7366	17.6959	17.6089	17.7806	17.7812	17.8435	17.7583	17.7559	17.6486	17.6811	17.6396	17.6738	17.6367	17.6837	17.7207	AP2A1.1	AP2A1	AP2A1_HUMAN	O95782	O95782	AP-2 complex subunit alpha-1	SASP	NA	altered	NA	46	50	49	51	51	53	51	48	52	52	52	52	53	53	48	51	51	51
		17.5781	17.5839	17.4148	17.6502	17.5417	17.5981	17.5791	17.4398	17.5954	17.5552	17.5305	17.4548	17.5203	17.3649	17.2338	17.4379	17.2052	17.2906	17.1439	17.352	AP2A1	AP2A1;AP2A2	AP2A1_HUMAN;AP2A2_HUMAN	O94973;O95782	O95782;O94973	AP-2 complex subunit alpha-2	SASP	NA	altered;down	NA	11	11	11	10	11	11	11	10	11	11	11	11	11	10	10	11	11	11
		16.7283	16.5914	16.5485	16.5367	16.6479	16.7519	16.7217	16.6071	16.7249	16.7729	16.6906	16.6723	16.6539	16.6618	16.7048	16.6644	16.7094	16.712	16.7604	16.78	AP2A2	AP2A2	AP2A2_HUMAN	O94973	O94973	AP-2 complex subunit alpha-2	SASP	NA	down	NA	41	41	43	45	43	44	42	41	47	43	42	45	40	45	46	44	42	43
		17.845	17.8847	17.9074	17.8642	17.9939	18.0498	17.9208	17.9718	18.1087	18.0043	18.0129	18.0904	17.9832	18.0401	18.087	17.9084	18.0344	18.053	18.1759	18.1725	AP2B1	AP2B1	AP2B1_HUMAN	P63010	P63010	AP-2 complex subunit beta	SASP	NA	down	NA	42	45	44	44	44	45	45	44	47	47	47	46	47	45	45	44	47	45
		17.1917	17.1875	17.2468	17.1979	17.1953	17.1784	17.1919	17.2425	17.2836	17.3146	17.2502	17.4376	17.3201	17.3061	17.2773	17.293	17.2614	17.3764	17.196	17.2721	AP2M1	AP2M1	AP2M1_HUMAN	Q96CW1	Q96CW1	AP-2 complex subunit mu	NA	NA	NA	NA	43	45	45	44	43	44	42	42	44	45	41	44	41	41	40	43	41	43
		18.9523	19.0322	19.0301	19.0091	19.0409	19.0375	18.9644	18.9687	19.0109	18.9931	19.0213	19.079	19.033	19.1031	19.072	19.0839	19.0493	19.1227	19.0887	18.9827	AP2S1	AP2S1	AP2S1_HUMAN	P53680	P53680	AP-2 complex subunit sigma	NA	NA	NA	NA	14	15	15	15	14	15	14	15	16	16	15	16	15	15	15	15	15	15
		16.3877	16.2914	16.3074	16.3196	16.3439	16.3421	16.3236	16.3844	16.4246	16.437	16.3515	16.4239	16.4302	16.3796	16.3635	16.399	16.3395	16.3431	16.3141	16.3808	AP3B1	AP3B1	AP3B1_HUMAN	O00203	O00203;Q13367	AP-3 complex subunit beta-1	NA	NA	NA	NA	65	70	67	68	67	73	69	67	66	69	68	68	68	67	65	67	63	69
		17.0217	16.9113	16.7119	16.7997	16.9581	16.9597	17.0325	16.8887	16.9669	16.9788	17.0463	17.0641	17.0883	17.0745	17.0296	17.0391	16.9928	17.0504	17.0515	17.0674	AP3D1	AP3D1	AP3D1_HUMAN	O14617	O14617	AP-3 complex subunit delta-1	NA	NA	NA	NA	63	60	59	60	63	63	62	59	59	61	59	63	62	59	58	59	59	62
		16.3161	16.3068	16.2688	16.2327	16.2971	16.3431	16.3562	16.3201	16.3664	16.4208	16.3901	16.3673	16.4279	16.4658	16.3791	16.3895	16.4585	16.329	16.4407	16.4439	AP3M1.1	AP3M1	AP3M1_HUMAN	Q9Y2T2	Q9Y2T2	AP-3 complex subunit mu-1	NA	NA	NA	NA	20	20	22	22	19	19	18	18	19	18	18	19	18	18	18	18	15	17
		16.0311	16.2487	16.3573	16.7168	16.3131	16.1196	16.1071	16.337	16.3276	16.3284	16.2281	16.138	16.1287	16.0763	15.9694	16.1335	15.947	15.6825	15.8867	15.8113	AP3M1	AP3M1;AP3M2	AP3M1_HUMAN;AP3M2_HUMAN	P53677;Q9Y2T2	Q9Y2T2;P53677	AP-3 complex subunit mu-2	NA	NA	NA	NA	5	5	5	4	5	5	4	5	5	5	5	5	5	4	5	5	5	5
		14.3307	14.3003	14.2176	14.4698	14.1764	14.2201	14.0012	14.2004	14.0465	14.0625	14.3236	14.4132	14.4313	14.3164	14.3361	14.4414	14.3	14.291	14.2609	14.2608	AP3M2	AP3M2	AP3M2_HUMAN	P53677	P53677	AP-3 complex subunit mu-2	NA	NA	NA	NA	7	9	10	9	9	9	9	10	9	10	11	8	11	8	10	9	9	9
		15.8169	15.8378	15.8039	15.8854	15.7772	15.8111	15.7217	15.8299	15.8778	15.8528	15.7044	15.6342	15.6393	15.5017	15.3806	15.5841	15.4478	15.457	15.452	15.6279	AP3S1	AP3S1	AP3S1_HUMAN	Q92572	Q92572	AP-3 complex subunit sigma-1	NA	NA	NA	NA	9	10	10	10	10	10	10	10	10	10	10	10	10	10	10	10	8	10
		10.9586	11.4514	11.2328	11.5017	11.3116	11.3633	10.872	11.302	11.3113	11.266	11.0251	11.069	10.8023	10.7697	10.5447	11.3395	10.9605	10.614	10.9186	10.6641	AP3S2	AP3S2	AP3S2_HUMAN	P59780	P59780	AP-3 complex subunit sigma-2	NA	NA	NA	NA	2	2	2	2	2	2	2	2	2	2	1	1	2	1	0	2	1	1
		13.4291	13.4896	13.1861	13.2443	13.5107	13.6194	13.7284	13.4545	13.3683	13.5297	13.4718	13.7367	13.644	13.6877	13.553	13.5896	13.4509	13.6687	13.4659	13.6002	NUDT2	NUDT2	AP4A_HUMAN	P50583	P50583	Bis(5'-nucleosyl)-tetraphosphatase [asymmetrical]	SASP	NA	up	NA	7	8	7	7	7	8	6	7	7	7	8	8	7	7	6	8	6	6
		11.5296	11.1226	10.378	9.5576	10.5276	11.033	10.9033	10.5089	9.84953	10.142	10.0229	9.6714	9.10906	10.0577	10.0847	11.4464	9.71814	11.0633	10.5738	10.6483	TEPSIN	TEPSIN	AP4AT_HUMAN	Q96N21	Q96N21	AP-4 complex accessory subunit Tepsin	NA	NA	NA	NA	1	1	1	1	1	1	1	1	1	1	1	1	1	0	0	0	0	0
		13.5473	13.1452	12.8884	13.0499	13.296	13.2719	13.2595	13.2206	13.2934	13.3509	13.4702	13.6784	13.6214	13.4969	13.4853	13.6029	13.4926	13.4993	13.291	13.4071	AP4B1	AP4B1	AP4B1_HUMAN	Q9Y6B7	Q9Y6B7	AP-4 complex subunit beta-1	NA	NA	NA	NA	15	17	13	13	16	15	15	17	15	10	14	14	12	13	12	14	12	14
		12.6904	13.0025	13.0951	13.0504	13.1167	12.8773	12.8122	12.8267	12.9618	13.0961	12.5509	12.8277	12.9058	12.6892	12.6652	12.8036	12.6591	12.7475	12.618	12.8147	AP4E1	AP4E1	AP4E1_HUMAN	Q9UPM8	Q9UPM8	AP-4 complex subunit epsilon-1	NA	NA	NA	NA	14	17	16	19	17	19	17	18	20	17	17	18	19	18	19	19	17	17
		13.0577	13.0123	13.0346	13.1042	12.936	12.9643	12.9677	13.0813	12.9253	12.9902	12.9495	12.6651	12.8255	12.8996	12.7555	12.8146	12.838	12.7893	12.8468	12.8796	AP4M1	AP4M1	AP4M1_HUMAN	O00189	O00189	AP-4 complex subunit mu-1	NA	NA	NA	NA	10	10	10	11	11	11	12	12	10	11	10	11	12	9	11	10	10	10
		13.3387	13.115	13.332	13.3148	12.8926	13.3119	13.0092	13.2301	13.1652	13.1702	13.1642	13.1806	13.2617	13.357	12.8875	13.432	13.3729	13.0139	12.9527	12.9811	AP4S1	AP4S1	AP4S1_HUMAN	Q9Y587	Q9Y587	AP-4 complex subunit sigma-1	NA	NA	NA	NA	3	3	3	3	3	3	3	3	3	3	3	3	3	3	3	3	3	3
		12.0375	11.9862	11.7985	12.0749	11.9745	11.8534	12.0678	12.3573	12.0273	12.139	11.9751	12.242	12.0635	12.12	12.0102	12.2701	12.1074	11.9378	11.734	11.8811	AP5B1	AP5B1	AP5B1_HUMAN	Q2VPB7	Q2VPB7	AP-5 complex subunit beta-1	NA	NA	NA	NA	4	4	4	6	4	7	7	6	4	7	6	5	7	5	6	5	4	4
		12.8673	13.0515	13.0469	12.9201	13.0147	12.9628	13.196	12.8527	12.9261	12.9228	13.3639	13.3419	13.3533	13.345	13.3175	13.2649	13.1892	13.0409	13.4105	13.4061	AP5M1	AP5M1	AP5M1_HUMAN	Q9H0R1	Q9H0R1	AP-5 complex subunit mu-1	NA	NA	NA	NA	4	6	6	5	6	7	5	6	6	5	5	6	6	7	5	7	6	6
		12.3253	12.2641	12.404	12.2414	12.4933	12.5749	12.4906	12.4338	12.4828	12.2985	12.4775	12.6108	12.7365	12.6233	12.449	12.7186	12.3714	12.6143	12.652	12.5925	AP5S1	AP5S1	AP5S1_HUMAN	Q9NUS5	Q9NUS5	AP-5 complex subunit sigma-1	NA	NA	NA	NA	7	6	6	5	6	7	5	6	7	7	6	6	6	7	7	7	7	6
		14.0555	14.1509	13.9817	13.8742	14.0825	14.1483	14.2189	14.196	14.2584	14.1445	14.2497	14.4347	14.2462	14.233	14.3063	14.4505	14.3511	14.2077	14.3184	14.3764	AP5Z1	AP5Z1	AP5Z1_HUMAN	O43299	O43299	AP-5 complex subunit zeta-1	NA	NA	NA	NA	8	8	9	8	8	9	9	9	9	9	9	8	9	9	8	9	8	9
		13.634	13.5847	13.6406	13.6474	13.6489	13.5714	13.6143	13.6046	13.5935	13.7128	13.4568	13.4133	13.4332	13.4726	13.3981	13.6165	13.4958	13.5295	13.3354	13.506	APAF1	APAF1	APAF_HUMAN	O14727	O14727	Apoptotic protease-activating factor 1	NA	NA	NA	NA	16	18	22	19	19	18	19	20	20	17	18	16	18	15	15	16	16	15
		12.9722	12.7959	12.5255	12.6174	12.891	12.9637	12.8118	12.8418	12.3727	12.5412	12.9295	12.8057	12.7086	12.7464	12.6503	12.7807	12.465	12.7219	12.6068	12.5968	APBA1	APBA1	APBA1_HUMAN	Q02410	Q02410	Amyloid-beta A4 precursor protein-binding family A member 1	NA	NA	NA	NA	9	10	8	7	9	10	10	10	8	9	9	8	9	10	10	10	9	9
		13.1447	12.9365	13.0551	13.2118	13.2012	13.0951	12.9764	13.0892	12.9013	12.9668	12.962	12.8892	13.1317	12.95	12.874	13.0264	12.6826	12.8148	12.8518	13.094	APBA1.1	APBA1;APBA2	APBA1_HUMAN;APBA2_HUMAN	Q02410;Q99767	Q02410;Q99767	Amyloid-beta A4 precursor protein-binding family A member 1	NA	NA	NA	NA	2	2	2	2	2	2	2	2	2	2	2	2	2	2	2	2	2	2
		13.416	13.4402	13.3129	13.5472	13.3385	13.1862	13.0822	13.6833	13.3229	13.0587	13.0272	12.932	12.9655	12.8757	12.7935	12.8455	12.4682	12.6453	12.282	12.2251	APBA2	APBA2	APBA2_HUMAN	Q99767	Q99767	Amyloid-beta A4 precursor protein-binding family A member 2	NA	NA	NA	NA	1	1	1	1	1	1	1	1	1	1	1	1	1	1	1	1	1	1
		13.2986	12.5491	12.69	12.789	12.6169	12.6311	12.9624	12.5943	12.0669	12.8625	12.6792	13.1749	12.5142	12.5205	12.9476	12.4132	12.7222	12.3334	12.4009	12.8756	APBA3	APBA3	APBA3_HUMAN	O96018	O96018	Amyloid-beta A4 precursor protein-binding family A member 3	NA	NA	NA	NA	2	2	2	2	2	2	2	2	1	2	1	2	2	2	2	2	2	2
		12.8228	12.2542	12.2632	12.4159	12.5132	12.55	12.7489	12.5844	12.7003	12.5687	12.4912	12.554	12.4814	12.5033	12.5481	12.309	12.3526	12.5013	12.5036	12.7639	APBB1	APBB1	APBB1_HUMAN	O00213	O00213	Amyloid-beta A4 precursor protein-binding family B member 1	NA	NA	NA	NA	10	10	9	11	10	10	9	9	9	10	9	9	9	10	9	8	8	7
		12.0251	11.7865	11.9389	12.1553	11.7966	11.6395	11.6805	11.695	11.8663	11.739	12.0103	11.8495	12.1124	11.9566	11.8651	11.8862	11.5012	11.6402	11.1797	11.5632	APBB2	APBB2	APBB2_HUMAN	Q92870	Q92870	Amyloid-beta A4 precursor protein-binding family B member 2	NA	NA	NA	NA	4	4	5	6	6	5	4	5	6	5	5	4	4	3	3	4	3	5
		13.1556	12.8093	12.6995	12.9664	12.7972	12.7682	13.0899	12.677	12.8262	12.7403	12.9149	13.0563	12.8628	12.9581	12.9762	13.0111	12.9073	12.9713	13.0172	13.0345	APPBP2	APPBP2	APBP2_HUMAN	Q92624	Q92624	Amyloid protein-binding protein 2	NA	NA	NA	NA	2	5	5	3	2	3	3	4	4	4	4	4	5	5	3	5	5	4
		11.966	11.4431	10.8458	11.0865	11.5543	11.3157	11.7151	11.2667	11.2779	11.2166	11.57	11.3713	11.4271	11.5733	11.6838	11.5284	11.487	11.4758	11.541	11.255	APC	APC	APC_HUMAN	P25054	P25054	Adenomatous polyposis coli protein	NA	NA	NA	NA	8	8	6	5	6	8	7	7	8	6	8	6	5	7	7	8	7	7
		13.6319	13.6389	13.6409	13.7078	13.7311	13.6944	13.6507	13.7109	13.6725	13.7125	13.7441	13.7559	13.7176	13.6572	13.6693	13.8063	13.69	13.6054	13.5941	13.6499	ANAPC1	ANAPC1	APC1_HUMAN	Q9H1A4	Q9H1A4	Anaphase-promoting complex subunit 1	NA	NA	NA	NA	38	42	41	44	37	41	40	43	42	43	33	36	36	37	34	37	34	34
		12.4266	12.043	11.8151	12.5435	12.3929	12.6274	12.609	12.3436	12.4475	12.2539	12.6977	12.5591	12.7699	12.7453	12.9076	12.8725	12.7638	12.6088	12.709	12.6271	ANAPC10	ANAPC10	APC10_HUMAN	Q9UM13	Q9UM13	Anaphase-promoting complex subunit 10	NA	NA	NA	NA	4	5	4	3	5	4	5	4	4	5	5	5	5	5	5	5	4	5
		12.8499	12.66	12.3158	12.2637	12.3052	13.1137	12.324	12.9624	11.825	12.5459	12.4284	12.3713	12.1342	12.1017	12.1849	12.3593	12.4918	12.6812	12.3486	12.2204	ANAPC16	ANAPC16	APC16_HUMAN	Q96DE5	Q96DE5	Anaphase-promoting complex subunit 16	NA	NA	NA	NA	2	1	2	2	1	2	2	2	1	1	1	2	2	1	1	2	1	1
		13.2371	13.1968	13.104	13.2336	13.2821	13.1818	13.3916	13.2158	13.0314	13.234	13.3123	13.2802	13.2348	13.2842	13.2732	13.3521	13.2629	13.2841	13.288	13.1812	ANAPC4	ANAPC4	APC4_HUMAN	Q9UJX5	Q9UJX5	Anaphase-promoting complex subunit 4	NA	NA	NA	NA	15	17	18	16	17	18	16	17	18	17	16	15	15	18	18	19	17	18
		14.0298	13.9816	13.7854	13.8758	13.9901	13.9993	14.0362	13.9453	13.8519	13.9011	13.9588	14.1453	13.9922	14.0307	14.0416	14.0242	14.1218	14.0881	14.1863	14.1643	ANAPC5	ANAPC5	APC5_HUMAN	Q9UJX4	Q9UJX4	Anaphase-promoting complex subunit 5	NA	NA	NA	NA	26	25	25	25	25	25	23	23	26	23	24	20	25	22	19	25	19	22
		13.9611	13.6399	13.5782	13.4958	13.7252	13.7486	13.8634	13.8079	13.8939	13.9131	13.983	13.9246	13.7928	13.8138	13.9481	13.8691	13.933	13.8937	13.7838	13.8959	ANAPC7	ANAPC7	APC7_HUMAN	Q9UJX3	Q9UJX3	Anaphase-promoting complex subunit 7	NA	NA	NA	NA	23	23	19	22	22	24	25	25	23	24	23	23	23	24	18	26	23	24
		11.4864	11.67	11.4598	11.4929	11.4993	11.7263	11.9553	11.9397	11.6239	12.1554	11.7817	9.27969	11.7157	11.4082	11.8912	11.7397	11.847	11.7042	11.724	11.7734	APCDD1	APCDD1	APCD1_HUMAN	Q8J025	Q8J025	Protein APCDD1	NA	NA	NA	NA	2	2	2	2	3	2	3	3	2	3	1	0	3	2	2	3	2	3
		12.2311	11.6795	11.4356	11.3421	11.6584	11.6038	11.5457	11.4946	11.6622	11.9381	12.1725	12.166	11.8868	12.1246	12.1045	12.1517	12.0281	11.8483	12.1037	12.0835	APCDD1L	APCDD1L	APCDL_HUMAN	Q8NCL9	Q8NCL9	Protein APCDD1-like	NA	NA	NA	NA	3	3	2	4	2	3	1	3	3	3	3	4	4	3	4	4	2	2
		17.1254	17.0945	16.6771	16.7841	16.9631	17.0706	17.1204	17.0733	17.06	17.2416	17.2892	17.341	17.2852	17.2135	17.1622	17.3264	17.297	17.3775	17.2311	17.3061	APEX1	APEX1	APEX1_HUMAN	P27695	P27695	DNA-(apurinic or apyrimidinic site) endonuclease	SASP	NA	altered	NA	36	37	36	35	36	38	37	36	36	36	36	36	36	35	36	37	36	36
		13.3922	13.537	13.9562	13.9247	13.4878	13.6263	13.7379	13.6908	13.696	13.848	13.725	13.549	13.6717	13.8775	13.8012	14.1185	13.8404	13.7416	13.8022	13.9675	APH1A	APH1A	APH1A_HUMAN	Q96BI3	Q96BI3	Gamma-secretase subunit APH-1A	NA	NA	NA	NA	3	3	3	3	2	3	3	3	3	3	3	2	3	2	3	3	3	3
		12.6037	12.5191	12.8019	12.6712	12.8417	12.887	12.7624	12.5716	12.9284	13.1314	12.616	12.228	12.5524	12.3198	12.1908	12.2912	12.3215	12.2316	12.7075	12.2254	APH1B	APH1B	APH1B_HUMAN	Q8WW43	Q8WW43	Gamma-secretase subunit APH-1B	NA	NA	NA	NA	1	2	2	2	2	1	2	2	2	2	2	2	2	2	2	2	2	2
		16.2886	16.276	16.0007	16.071	16.2077	16.36	16.3401	16.2651	16.3606	16.2736	16.0891	16.0653	16.1508	15.986	16.1051	16.0987	15.9891	16.0616	16.0828	16.1922	API5	API5	API5_HUMAN	Q9BZZ5	Q9BZZ5	Apoptosis inhibitor 5	SASP	NA	down	NA	27	29	28	30	30	28	27	26	30	30	27	28	27	28	26	28	26	27
		12.4261	12.523	12.5563	12.4958	12.6136	12.637	12.4627	12.6915	12.808	12.9752	12.608	12.7864	12.7973	12.6385	12.7123	12.706	12.6516	12.5728	12.5232	12.7922	APLF	APLF	APLF_HUMAN	Q8IW19	Q8IW19	Aprataxin and PNK-like factor	NA	NA	NA	NA	5	6	6	5	6	6	6	7	6	6	6	6	5	6	4	5	5	6
		13.8247	13.6793	13.4473	13.4579	13.6405	13.8379	13.9418	13.7985	13.6402	13.6969	13.82	13.8611	13.9388	13.9141	14.0278	13.9125	13.8529	13.879	13.9607	14.0732	APLP2.1	APLP2	APLP2_HUMAN	Q06481	Q06481	Amyloid-like protein 2	SASP	NA	altered	NA	21	24	23	22	22	24	24	22	22	25	24	22	23	25	23	24	21	22
		17.1501	17.4974	17.5955	17.5081	17.4943	17.4207	17.4197	17.464	17.5547	17.59	17.4578	17.5882	17.4857	17.4642	17.4488	17.5216	17.5706	17.4452	17.4901	17.5148	APMAP	APMAP	APMAP_HUMAN	Q9HDC9	Q9HDC9	Adipocyte plasma membrane-associated protein	NA	NA	NA	NA	42	41	42	43	44	44	44	41	45	44	44	45	44	42	41	43	43	45
		10.7833	10.4001	10.9702	10.7966	11.5386	10.4507	11.0566	8.45631	9.36232	10.3773	9.81082	11.0861	11.0482	11.5306	10.6151	10.0369	9.77329	10.1425	9.65451	10.2697	APOA1	APOA1	APOA1_HUMAN	P02647	P02647	Apolipoprotein A-I	SASP	NA	up	NA	0	1	2	1	0	2	1	0	0	1	0	0	0	3	0	0	0	0
		13.8607	13.9228	14.0234	13.9318	13.8873	14.1441	13.9835	13.8471	13.9752	13.8336	13.8137	13.7587	13.7042	13.3322	13.7035	13.6225	13.3436	13.4972	13.6667	13.6967	APOA4	APOA4	APOA4_HUMAN	P06727	P06727	Apolipoprotein A-IV	NA	NA	NA	NA	1	1	1	1	1	1	1	1	1	1	1	1	1	1	1	1	1	1
		11.964	11.5894	11.7349	11.3019	11.0297	11.0874	11.3946	11.4761	11.3807	11.5624	11.0121	11.8199	11.2961	11.2138	11.0745	10.7595	10.9101	10.6932	10.5557	11.0955	APOB	APOB	APOB_HUMAN	P04114	P04114	Apolipoprotein B-100	SASP	NA	down	NA	5	4	6	4	3	4	4	2	3	4	4	2	4	4	4	4	3	2
		15.2134	15.3236	15.2142	15.1853	15.2175	15.0365	14.8905	15.2477	15.085	15.0019	16.1282	16.095	16.0375	15.9839	15.8032	16.1473	15.7332	15.6532	15.5907	15.7508	APOD	APOD	APOD_HUMAN	P05090	P05090	Apolipoprotein D	SASP	NA	down	NA	6	6	5	5	5	5	5	5	5	5	6	6	6	6	6	5	6	5
		11.3931	10.6611	12.0711	11.7717	11.2569	12.1073	11.6239	11.2342	11.6185	11.0794	11.8518	11.3579	11.53	11.4941	11.4201	11.1213	11.3501	11.3743	11.6701	11.6454	APOE	APOE	APOE_HUMAN	P02649	P02649	Apolipoprotein E	SASP	NA	down	NA	3	2	3	3	3	3	3	2	3	2	3	3	3	3	3	3	2	3
		16.8055	16.9021	16.9965	16.983	17.0455	16.938	16.9009	17.1005	17.0773	17.0303	16.7268	16.8574	16.787	16.8166	16.8135	16.946	16.68	16.7099	16.7508	16.8114	APOL2	APOL2	APOL2_HUMAN	Q9BQE5	Q9BQE5	Apolipoprotein L2	NA	NA	NA	NA	17	15	16	14	16	17	15	15	15	16	16	16	17	17	15	17	15	16
		13.2033	13.0737	13.1677	12.96	13.0147	13.4297	13.3853	13.0284	13.291	13.1805	12.7607	12.6862	12.6297	12.6543	12.645	12.8593	12.6791	12.8864	12.9163	12.8913	APOL3	APOL3	APOL3_HUMAN	O95236	O95236	Apolipoprotein L3	NA	NA	NA	NA	7	7	7	7	8	8	8	8	7	8	6	7	7	7	6	7	7	6
		11.2275	12.2986	12.5344	8.70117	10.1334	9.60672	12.052	11.0127	12.3855	11.9527	9.67206	12.3674	10.7764	10.2659	10.0627	9.74327	10.4057	9.87154	10.0531	10.7982	APOL4	APOL4	APOL4_HUMAN	Q9BPW4	Q9BPW4	Apolipoprotein L4	NA	NA	NA	NA	0	1	1	0	0	0	1	0	1	1	0	1	0	0	0	0	0	0
		16.9923	17.3102	17.1559	17.0033	16.9927	16.9703	17.0849	17.1116	17.2334	17.2377	17.0993	17.3054	17.1813	17.084	17.1264	17.1411	17.1022	17.1582	17.1307	17.1884	APRT	APRT	APT_HUMAN	P07741	P07741	Adenine phosphoribosyltransferase	SASP	NA	down	NA	14	14	13	15	15	15	15	15	16	14	16	15	16	16	16	16	15	16
		12.4508	12.8014	12.6501	12.7005	12.7096	12.9006	12.8875	12.6918	12.6352	12.8925	12.7533	12.9624	12.8732	12.8061	12.8363	12.7822	12.7475	12.9941	12.8211	12.8802	APTX	APTX	APTX_HUMAN	Q7Z2E3	Q7Z2E3	Aprataxin	NA	NA	NA	NA	5	8	7	6	7	7	7	7	7	8	7	8	7	8	8	8	7	7
		12.3143	12.171	12.1131	11.7711	12.7352	12.4089	12.1614	12.3301	12.6027	12.5024	13.2529	13.6303	13.1992	13.3791	13.3957	13.4732	13.7442	13.3788	13.6236	13.5761	AQP1	AQP1	AQP1_HUMAN	P29972	P29972	Aquaporin-1	NA	NA	NA	NA	1	2	1	1	2	1	1	1	2	1	2	1	2	2	2	1	2	2
		14.9116	14.8282	14.8124	14.8144	14.9452	14.9728	14.979	14.9822	14.9158	14.9886	14.8254	14.9225	14.7803	14.818	14.8557	14.9599	14.8762	14.8799	14.8963	14.9178	AQR	AQR	AQR_HUMAN	O60306	O60306	RNA helicase aquarius	NA	NA	NA	NA	45	45	44	43	44	46	45	46	42	45	46	44	40	42	42	43	43	45
		14.9798	14.9973	15.0044	14.9995	14.9447	15.0425	14.8434	15.057	15.112	14.9379	14.7494	14.8148	14.8046	14.5599	14.6745	14.8386	14.8138	14.9597	14.7624	14.8438	ARL2BP	ARL2BP	AR2BP_HUMAN	Q9Y2Y0	Q9Y2Y0	ADP-ribosylation factor-like protein 2-binding protein	NA	NA	NA	NA	8	8	8	7	8	7	7	8	7	7	7	7	7	7	6	7	6	6
		14.9014	15.2387	14.5108	14.6701	14.3873	14.6795	14.9093	15.0134	14.9593	15.1006	14.5037	14.6255	14.6419	14.782	14.4673	14.6753	14.5885	14.9197	14.9854	15.0264	ARL6IP1	ARL6IP1	AR6P1_HUMAN	Q15041	Q15041	ADP-ribosylation factor-like protein 6-interacting protein 1	NA	NA	NA	NA	4	3	2	2	3	3	2	3	3	4	3	3	3	3	2	3	3	2
		14.2789	14.0392	13.9424	13.8895	14.1746	14.2628	14.1335	14.1476	14.0903	14.2502	14.2669	14.2131	14.2891	14.1465	14.1308	14.3751	14.1578	14.2568	14.1159	14.1451	ARL6IP4	ARL6IP4	AR6P4_HUMAN	Q66PJ3	Q66PJ3	ADP-ribosylation factor-like protein 6-interacting protein 4	NA	NA	NA	NA	10	10	10	10	10	10	10	10	10	10	10	10	10	10	9	10	10	10
		13.6764	14.2058	14.4102	14.3205	14.3106	14.2876	14.1046	14.2218	14.0023	14.1244	13.4182	13.4748	13.6699	13.505	13.4748	13.9541	13.4265	13.588	13.608	13.6795	ARL6IP6	ARL6IP6	AR6P6_HUMAN	Q8N6S5	Q8N6S5	ADP-ribosylation factor-like protein 6-interacting protein 6	NA	NA	NA	NA	4	4	3	4	4	4	4	4	4	3	4	4	4	4	4	4	4	4
		13.888	13.8775	14.2276	14.2739	14.3827	14.1095	14.0961	14.2911	14.3331	14.2592	13.5803	14.0398	14.0878	14.1316	14.0179	14.0204	13.9678	14.0216	14.1686	14.2202	ARAF.2	ARAF	ARAF_HUMAN	P10398	P10398	Serine/threonine-protein kinase A-Raf	NA	NA	NA	NA	8	8	10	9	10	10	9	8	11	10	5	10	8	9	9	8	10	9
		13.1783	14.0078	14.105	13.9725	13.793	13.9498	13.8638	13.9829	13.8918	13.9369	12.6556	13.4353	12.9618	13.3131	13.3071	13.7062	12.5964	12.8087	12.6429	12.9055	ARAF.3	ARAF;BRAF	ARAF_HUMAN;BRAF_HUMAN	P10398;P15056	P10398;P15056	Serine/threonine-protein kinase A-Raf	NA	NA	NA	NA	1	1	1	1	1	1	1	1	1	1	1	1	1	1	1	1	1	1
		15.0382	14.906	14.7257	14.8712	14.9627	14.847	14.8958	15.0099	14.9102	15.0773	14.8501	14.947	15.0028	14.9749	14.9008	14.886	14.7566	14.7667	14.7857	15.0376	ARAF.1	ARAF;BRAF;RAF1	ARAF_HUMAN;BRAF_HUMAN;RAF1_HUMAN	P04049;P10398;P15056	P10398;P15056;P04049	RAF proto-oncogene serine/threonine-protein kinase	NA	NA	NA	NA	5	6	6	5	6	5	5	5	6	6	4	5	4	5	5	4	5	5
		13.6714	13.2013	12.7623	12.9428	13.3682	13.3007	13.6396	13.6051	13.4222	13.3431	13.8373	13.7916	13.5627	13.7847	13.7358	13.7874	13.7208	13.7232	13.7759	13.7837	ARAF	ARAF;RAF1	ARAF_HUMAN;RAF1_HUMAN	P04049;P10398	P10398;P04049	RAF proto-oncogene serine/threonine-protein kinase	NA	NA	NA	NA	2	2	2	2	2	2	1	2	2	2	2	2	2	2	2	2	2	2
		12.9324	12.8878	12.8219	13.1243	12.8833	12.8401	12.7433	12.8099	12.3653	12.4193	12.5986	12.0395	12.4539	12.3519	12.3814	12.6868	12.4868	12.1812	12.3031	12.4047	ATRAID	ATRAID	ARAID_HUMAN	Q6UW56	Q6UW56	All-trans retinoic acid-induced differentiation factor	NA	NA	NA	NA	1	2	2	2	2	2	2	2	2	2	1	2	2	2	1	2	1	2
		14.8292	14.8236	14.6271	14.7799	14.7726	14.8129	14.799	14.798	14.7564	14.7016	14.7794	14.7834	14.8325	14.7406	14.7494	14.8617	14.8207	14.7934	14.7232	14.832	ARAP1	ARAP1	ARAP1_HUMAN	Q96P48	Q96P48	Arf-GAP with Rho-GAP domain, ANK repeat and PH domain-containing protein 1	NA	NA	NA	NA	41	42	42	39	42	41	41	41	42	40	40	39	39	38	35	38	38	40
		13.3912	13.3824	13.3374	13.2433	13.33	13.39	13.3828	13.3642	13.2489	13.2773	13.4072	13.5173	13.4003	13.3384	13.2652	13.3681	13.2797	13.2366	13.211	13.285	ARAP3	ARAP3	ARAP3_HUMAN	Q8WWN8	Q8WWN8	Arf-GAP with Rho-GAP domain, ANK repeat and PH domain-containing protein 3	NA	NA	NA	NA	18	22	23	22	20	23	24	25	24	22	22	22	24	22	22	23	23	23
		14.1983	14.4055	14.2563	14.2677	14.2508	14.2816	14.2469	14.1975	14.2293	14.2638	14.2343	14.2796	14.2664	14.2042	14.3379	14.2627	14.1857	14.1534	14.3567	14.2362	GRK2	GRK2	ARBK1_HUMAN	P25098	P25098	Beta-adrenergic receptor kinase 1	NA	NA	NA	NA	9	11	8	10	11	10	10	9	10	9	10	7	8	7	8	9	9	9
		14.1152	14.2578	14.3384	14.2616	14.207	14.2609	14.0532	14.35	14.2741	14.3153	14.4045	14.1717	14.2061	14.1932	14.0713	14.3088	14.0799	14.1059	14.1253	14.1799	GRK2.1	GRK2;GRK3	ARBK1_HUMAN;ARBK2_HUMAN	P25098;P35626	P25098;P35626	Beta-adrenergic receptor kinase 1	NA	NA	NA	NA	3	3	3	3	3	3	3	3	3	3	3	3	3	3	3	3	3	3
		16.3608	16.4297	16.3078	16.3751	16.3492	16.3703	16.4551	16.3764	16.4206	16.4693	16.3975	16.4247	16.4285	16.3767	16.3317	16.4404	16.3422	16.3992	16.3111	16.4573	ARPC1A.1	ARPC1A	ARC1A_HUMAN	Q92747	Q92747	Actin-related protein 2/3 complex subunit 1A	SASP	NA	down	NA	23	23	23	23	23	23	22	22	23	23	22	23	23	23	23	22	22	22
		14.9604	14.4739	14.361	14.1704	14.7882	14.5072	14.3711	14.2277	14.0007	14.4229	14.7589	14.8304	14.664	14.6372	14.5372	14.7535	14.7219	14.5063	14.722	14.7111	ARPC1A	ARPC1A;ARPC1B	ARC1A_HUMAN;ARC1B_HUMAN	O15143;Q92747	Q92747;O15143	Actin-related protein 2/3 complex subunit 1B	SASP	NA	altered;down	NA	2	2	2	2	2	2	2	2	2	2	2	2	2	2	2	2	2	2
		18.8968	18.8042	18.5546	18.6109	18.7084	18.6838	18.7152	18.6435	18.7395	18.8662	18.8249	18.9194	18.8549	18.8213	18.7847	18.7873	18.8133	18.8033	18.7198	18.7649	ARPC1B	ARPC1B	ARC1B_HUMAN	O15143	O15143	Actin-related protein 2/3 complex subunit 1B	SASP	NA	altered	NA	34	34	32	34	31	34	34	34	33	34	33	32	33	34	33	33	34	34
		13.8873	13.8419	13.8762	13.5853	13.6769	14.0621	13.9284	14.0769	14.206	13.956	13.9397	14.0234	14.159	13.8941	14.0524	14.1628	14.1297	14.0728	14.0251	13.919	ZBTB8OS	ZBTB8OS	ARCH_HUMAN	Q8IWT0	Q8IWT0	Protein archease	SASP	NA	down	NA	2	2	4	3	4	4	4	4	4	3	4	4	4	4	3	4	4	4
		11.0905	11.0133	10.5991	10.9197	10.7249	10.8782	10.6063	10.5168	10.5974	10.6482	11.027	10.671	11.0052	11.1483	11.0305	10.8024	10.9102	11.1453	10.7629	10.7241	AREL1	AREL1	AREL1_HUMAN	O15033	O15033	Apoptosis-resistant E3 ubiquitin protein ligase 1	NA	NA	NA	NA	1	2	2	1	2	2	1	2	2	2	2	1	2	2	1	1	1	2
		18.7915	19.0766	18.8291	18.9432	18.7526	18.7489	18.8385	19.1491	19.0912	19.0112	18.8272	18.8013	18.8931	18.7718	18.8481	18.7074	18.8474	18.7996	18.9239	18.9531	ARF1.1	ARF1	ARF1_HUMAN	P84077	P84077;P61204	ADP-ribosylation factor 1	SASP	NA	down	NA	13	14	11	14	14	15	14	15	14	15	15	14	14	13	14	15	14	15
		18.0297	18.8289	19.1569	18.9322	18.923	18.8387	18.1686	18.2768	18.7785	18.6819	17.9496	18.3554	18.2982	18.0316	18.0721	18.3031	17.9391	17.721	18.142	18.2508	ARF1	ARF1;ARF4;ARF5	ARF1_HUMAN;ARF4_HUMAN;ARF5_HUMAN	P18085;P84077;P84085	P84077;P61204;P18085;P84085	ADP-ribosylation factor 4	SASP	NA	down	NA	7	7	7	7	7	7	7	7	7	7	7	7	7	7	7	7	7	7
		18.601	19.1808	19.5794	19.3968	19.3853	19.1978	18.9176	19.2041	19.323	19.2991	18.6257	18.6663	18.8439	18.3727	18.178	18.8239	18.4247	18.2187	18.1563	18.2434	ARF1.2	ARF1;ARF5	ARF1_HUMAN;ARF5_HUMAN	P84077;P84085	P84077;P61204;P84085	ADP-ribosylation factor 1	SASP	NA	down	NA	1	1	1	1	1	1	1	1	1	1	1	1	1	1	1	1	1	1
		19.3582	19.6249	19.8985	19.7402	19.8162	19.8408	19.6621	19.6343	20.0887	20.0991	19.6971	19.8628	19.7543	19.6744	19.608	19.5962	19.5631	19.6797	19.5904	19.7914	ARF4	ARF4	ARF4_HUMAN	P18085	P18085	ADP-ribosylation factor 4	NA	NA	NA	NA	9	9	9	9	9	9	9	9	9	9	9	9	9	9	9	9	9	9
		17.0868	17.1279	16.9149	17.0115	17.0551	17.0775	17.0835	17.1739	17.2799	17.2882	17.0683	17.1505	17.0583	17.0531	17.0624	16.9561	17.2385	17.1406	17.0521	17.1553	ARF5	ARF5	ARF5_HUMAN	P84085	P84085	ADP-ribosylation factor 5	NA	NA	NA	NA	12	11	12	12	12	12	12	12	12	12	12	12	12	12	12	12	12	12
		17.3206	17.4911	17.5186	17.443	17.5281	17.6642	17.5294	17.494	17.5959	17.6634	17.6797	17.8542	17.7425	17.7374	17.6801	17.7328	17.6057	17.6023	17.698	17.7996	ARF6	ARF6	ARF6_HUMAN	P62330	P62330	ADP-ribosylation factor 6	NA	NA	NA	NA	15	14	15	15	15	15	15	14	14	15	15	15	15	15	14	14	15	15
		15.9901	15.8455	15.8745	15.703	15.8499	15.9015	15.8993	15.7825	15.9032	15.8873	15.9554	15.9334	15.9962	15.9786	16.0163	16.0245	15.9513	16.0439	16.0699	16.0771	ARFGAP1	ARFGAP1	ARFG1_HUMAN	Q8N6T3	Q8N6T3	ADP-ribosylation factor GTPase-activating protein 1	NA	NA	NA	NA	19	18	17	19	19	18	20	21	21	19	20	19	19	21	20	20	20	19
		14.672	14.5554	14.7199	14.6433	14.6881	14.589	14.6545	14.6653	14.7343	14.6984	14.6342	14.624	14.6318	14.6444	14.541	14.6909	14.577	14.5629	14.5478	14.5936	ARFGAP2	ARFGAP2	ARFG2_HUMAN	Q8N6H7	Q8N6H7	ADP-ribosylation factor GTPase-activating protein 2	NA	NA	NA	NA	26	27	27	28	26	30	27	29	30	29	28	27	29	27	23	27	27	26
		13.3201	13.2213	13.5213	13.5819	13.2809	13.4133	13.2731	13.4448	13.3465	13.4139	12.6547	14.0873	13.7664	14.094	13.8606	13.9871	13.7441	14.2764	14.4345	14.7323	ARFGAP2.1	ARFGAP2;ARFGAP3	ARFG2_HUMAN;ARFG3_HUMAN	Q8N6H7;Q9NP61	Q8N6H7;Q9NP61	ADP-ribosylation factor GTPase-activating protein 2	NA	NA	NA	NA	1	1	1	1	1	1	1	1	1	1	1	1	1	1	1	1	1	1
		15.6705	15.714	15.4562	15.5783	15.6047	15.6433	15.6935	15.6969	15.6537	15.7298	15.7116	15.7593	15.8301	15.5765	15.5969	15.6619	15.7271	15.7056	15.7112	15.6965	ARFGAP3	ARFGAP3	ARFG3_HUMAN	Q9NP61	Q9NP61	ADP-ribosylation factor GTPase-activating protein 3	NA	NA	NA	NA	33	31	32	29	35	35	33	35	34	34	33	31	35	32	29	34	32	35
		16.0827	16.0286	15.7805	15.9351	15.9698	16.2113	16.1361	16.0231	16.1564	16.0871	16.12	16.0803	16.1257	16.05	16.0371	16.041	15.8685	16.0604	16.043	16.1152	ARFIP1	ARFIP1	ARFP1_HUMAN	P53367	P53367	Arfaptin-1	NA	NA	NA	NA	26	26	25	25	23	25	25	25	26	25	26	24	26	25	25	24	25	25
		13.8876	13.5581	13.3628	13.3738	13.6253	13.9504	13.9629	13.6746	13.8153	13.427	13.9201	13.8292	13.8457	13.7504	13.9	13.7671	13.6312	13.8247	13.8629	13.7949	ARFIP2	ARFIP2	ARFP2_HUMAN	P53365	P53365	Arfaptin-2	NA	NA	NA	NA	11	11	10	11	12	13	13	10	11	11	11	11	12	9	10	12	9	11
		12.8965	12.8053	12.5542	12.8927	12.9199	12.6119	12.7393	13.1509	13.1264	13.0412	13.0813	13.1551	12.9325	12.825	12.9054	13.1777	12.884	12.691	12.6412	12.765	ARFRP1	ARFRP1	ARFRP_HUMAN	Q13795	Q13795	ADP-ribosylation factor-related protein 1	NA	NA	NA	NA	3	4	4	4	5	5	4	4	5	5	4	4	4	4	4	4	3	5
		12.9236	12.9771	12.5847	12.7867	12.6438	12.7991	12.8385	12.7084	12.8227	12.5868	12.5463	12.8755	12.5583	12.8322	12.4669	12.6302	13.0878	12.2921	12.3677	12.5001	ARHGEF28	ARHGEF28	ARG28_HUMAN	Q8N1W1	Q8N1W1	Rho guanine nucleotide exchange factor 28	NA	NA	NA	NA	6	6	6	4	4	4	5	5	6	4	4	3	5	1	3	4	1	3
		12.5841	12.4977	12.429	12.6668	12.6308	12.5589	12.5791	12.4923	12.5848	12.6173	12.6356	12.8103	12.647	12.6233	12.528	12.6801	12.5652	12.6836	12.5691	12.7778	ARHGEF10L	ARHGEF10L	ARGAL_HUMAN	Q9HCE6	Q9HCE6	Rho guanine nucleotide exchange factor 10-like protein	NA	NA	NA	NA	9	11	11	10	11	11	10	12	9	9	10	11	9	10	8	11	8	10
		12.7793	12.4355	12.1298	11.9552	12.1751	12.8893	11.7427	12.2968	12.5337	12.8259	12.7745	12.5978	12.1517	12.556	13.0025	12.8928	12.9236	13.0156	12.8742	12.381	ARHGEF10.1	ARHGEF10;ARHGEF10L	ARGAL_HUMAN;ARHGA_HUMAN	O15013;Q9HCE6	Q9HCE6;O15013	Rho guanine nucleotide exchange factor 10	NA	NA	NA	NA	1	1	1	1	2	1	1	2	1	1	1	1	1	1	2	1	1	1
		13.0371	11.3534	13.5804	12.4148	12.9003	12.9998	13.9234	11.8693	11.3654	12.8682	12.206	12.2979	12.637	11.6988	11.6362	12.9627	11.9656	11.8502	13.158	12.8409	ARG1	ARG1	ARGI1_HUMAN	P05089	P05089	Arginase-1	SASP	NA	up	NA	7	4	7	8	8	7	10	4	4	7	5	6	6	1	0	9	5	4
		14.2166	14.5511	14.5821	14.8468	14.445	14.8304	14.5949	14.5872	14.6127	14.6691	14.4844	14.4452	14.5834	14.4094	14.2792	14.4968	14.4198	14.4986	14.261	14.3961	ARGLU1	ARGLU1	ARGL1_HUMAN	Q9NWB6	Q9NWB6	Arginine and glutamate-rich protein 1	NA	NA	NA	NA	9	10	10	10	8	9	10	10	10	10	10	10	9	10	9	10	9	10
		13.9496	13.8748	13.7908	13.9126	13.9987	14.112	14.1396	13.9301	13.945	13.9034	14.3952	14.302	14.323	14.3613	14.367	14.2845	14.0241	14.1696	14.1959	14.2615	LDLRAP1	LDLRAP1	ARH_HUMAN	Q5SW96	Q5SW96	Low density lipoprotein receptor adapter protein 1	NA	NA	NA	NA	12	11	12	11	9	10	8	11	12	11	9	7	11	10	9	10	10	10
		14.4044	14.2168	14.3522	14.2646	14.3468	14.4155	14.3707	14.3312	14.3809	14.3326	14.3482	14.2691	14.3036	14.2292	14.2165	14.3828	14.2754	14.2669	14.3247	14.3572	ARHGEF40	ARHGEF40	ARH40_HUMAN	Q8TER5	Q8TER5	Rho guanine nucleotide exchange factor 40	NA	NA	NA	NA	37	36	34	38	37	38	40	36	36	37	35	32	34	37	34	32	35	34
		15.7065	15.733	15.542	15.5866	15.7449	15.7832	15.6841	15.6166	15.798	15.6681	15.4741	15.4102	15.5503	15.4556	15.4785	15.5719	15.2823	15.4158	15.5289	15.5703	ARHGEF1	ARHGEF1	ARHG1_HUMAN	Q92888	Q92888	Rho guanine nucleotide exchange factor 1	NA	NA	NA	NA	44	43	45	44	39	45	44	42	45	44	47	45	43	42	43	44	45	45
		15.9698	16.0025	16.0537	16.0799	16.1133	16.2989	16.0315	16.006	16.1451	16.1511	15.955	16.0201	16.1213	15.9849	15.9727	16.0917	15.9315	15.9276	16.021	16.0981	ARHGEF2	ARHGEF2	ARHG2_HUMAN	Q92974	Q92974	Rho guanine nucleotide exchange factor 2	SASP	NA	up	NA	46	49	46	47	49	47	46	49	53	46	48	47	48	49	49	50	50	50
		12.5834	12.4341	12.6701	12.5317	12.5573	12.538	12.5269	12.8254	12.5499	12.4348	12.1244	12.4891	12.5904	12.43	12.5944	12.4711	12.535	12.5262	12.4244	12.563	ARHGEF5	ARHGEF5	ARHG5_HUMAN	Q12774	Q12774	Rho guanine nucleotide exchange factor 5	NA	NA	NA	NA	8	10	7	10	8	9	10	10	10	10	8	7	10	10	7	9	7	9
		13.1958	13.1141	13.1657	13.0837	13.2399	13.2025	13.3065	13.2022	13.1564	13.0239	12.7373	12.9166	12.7423	12.6989	12.8465	12.9463	12.8171	12.7768	12.6747	12.9267	ARHGEF6.1	ARHGEF6	ARHG6_HUMAN	Q15052	Q15052	Rho guanine nucleotide exchange factor 6	NA	NA	NA	NA	13	12	10	11	12	13	12	12	11	12	11	11	10	12	10	12	12	12
		15.5152	15.7521	15.7296	15.8105	15.7145	15.7038	15.6228	15.7996	15.9071	15.6789	15.3246	15.2373	15.461	15.3146	15.3182	15.5805	15.3962	15.3529	15.265	15.4709	ARHGEF6	ARHGEF6;ARHGEF7	ARHG6_HUMAN;ARHG7_HUMAN	Q14155;Q15052	Q15052;Q14155	Rho guanine nucleotide exchange factor 7	NA	NA	NA	NA	5	5	6	6	5	6	6	6	6	6	5	6	5	5	5	6	6	6
		14.3652	14.3222	14.5348	14.5435	14.2987	14.5126	14.5168	14.4188	14.4251	14.4348	14.4106	14.4682	14.3679	14.3686	14.3105	14.5142	14.2649	14.3292	14.3279	14.4973	ARHGEF7	ARHGEF7	ARHG7_HUMAN	Q14155	Q14155	Rho guanine nucleotide exchange factor 7	NA	NA	NA	NA	19	21	20	23	19	21	20	23	22	24	21	22	21	23	22	21	19	20
		14.8672	14.7262	14.5075	14.5818	14.7108	14.758	14.8962	14.7185	14.7666	14.7997	14.8524	14.9441	14.857	14.8535	14.819	14.8852	14.8664	14.8403	14.9484	14.8418	ARHGEF10	ARHGEF10	ARHGA_HUMAN	O15013	O15013	Rho guanine nucleotide exchange factor 10	NA	NA	NA	NA	43	42	43	40	46	45	42	44	44	46	41	39	46	43	42	40	41	43
		13.956	13.7576	13.5745	13.5453	13.7785	13.9301	13.8275	13.7405	13.7248	13.7625	13.7826	13.8262	13.9596	13.7768	13.8692	13.9167	13.7765	13.847	13.7837	13.9115	ARHGEF11	ARHGEF11	ARHGB_HUMAN	O15085	O15085	Rho guanine nucleotide exchange factor 11	NA	NA	NA	NA	28	32	32	35	33	35	35	33	37	32	32	35	33	34	33	34	29	31
		14.5221	14.4474	14.4215	14.4283	14.5533	14.4883	14.5445	14.4227	14.5405	14.4966	14.4316	14.4179	14.4846	14.4205	14.4198	14.4604	14.3467	14.2878	14.3965	14.4214	ARHGEF12	ARHGEF12	ARHGC_HUMAN	Q9NZN5	Q9NZN5	Rho guanine nucleotide exchange factor 12	SASP	NA	up	NA	42	43	42	40	41	44	40	41	45	43	39	41	43	41	37	42	37	37
		14.4241	14.3649	14.3767	14.4241	14.4339	14.4838	14.4271	14.4144	14.4364	14.375	14.4274	14.4119	14.4711	14.3785	14.4327	14.4691	14.3349	14.3891	14.4109	14.3973	ARHGEF17	ARHGEF17	ARHGH_HUMAN	Q96PE2	Q96PE2	Rho guanine nucleotide exchange factor 17	SASP	NA	down	NA	48	54	52	54	57	56	53	53	56	54	50	47	53	50	47	51	49	51
		12.6896	12.7619	12.7802	12.7216	12.6704	12.7432	12.7698	12.7374	12.829	12.5922	12.5169	12.5511	12.6354	12.5623	12.5076	12.5408	12.4323	12.4817	12.4702	12.4555	ARHGEF18	ARHGEF18	ARHGI_HUMAN	Q6ZSZ5	Q6ZSZ5	Rho guanine nucleotide exchange factor 18	SASP	NA	down	NA	15	14	13	12	15	14	15	14	14	13	13	12	13	12	13	15	10	15
		10.5543	8.97582	9.66973	10.3795	10.212	10.1863	10.0251	9.51361	10.0891	9.6779	10.0748	10.1652	10.2187	9.13989	10.4718	9.48084	10.0525	10.6457	10.9144	10.2329	ARHGEF25	ARHGEF25	ARHGP_HUMAN	Q86VW2	Q86VW2	Rho guanine nucleotide exchange factor 25	NA	NA	NA	NA	0	3	1	2	2	2	2	2	2	2	2	1	2	0	1	1	2	2
		15.3518	15.3487	15.067	15.2232	15.2979	15.1944	15.3713	15.2241	15.3389	15.3541	15.57	15.4637	15.4395	15.4581	15.3441	15.371	15.4104	15.3535	15.338	15.4015	ARIH1	ARIH1	ARI1_HUMAN	Q9Y4X5	Q9Y4X5	E3 ubiquitin-protein ligase ARIH1	NA	NA	NA	NA	17	17	15	16	16	18	18	17	18	18	17	17	17	18	17	17	17	18
		13.7286	13.5076	13.2328	13.3012	13.5442	13.7199	13.7401	13.5057	13.4552	13.549	13.4009	13.2132	13.4159	13.2997	13.2938	13.4838	13.262	13.3654	13.4622	13.5436	ARID1A	ARID1A	ARI1A_HUMAN	O14497	O14497	AT-rich interactive domain-containing protein 1A	NA	NA	NA	NA	34	34	30	35	36	36	37	34	36	34	37	31	33	33	33	35	33	34
		14.2124	13.7568	13.8697	13.6552	13.6499	14.0787	14.2563	13.8682	14.2494	13.9764	13.7005	13.8563	13.8389	13.6804	13.9659	13.8514	14.055	13.7491	13.6001	13.5585	ARID1A.1	ARID1A;ARID1B	ARI1A_HUMAN;ARI1B_HUMAN	O14497;Q8NFD5	O14497;Q8NFD5	AT-rich interactive domain-containing protein 1A	NA	NA	NA	NA	3	4	4	4	4	4	4	4	4	4	4	4	4	4	4	4	4	4
		13.6223	13.6462	13.4695	13.5121	13.4747	13.7756	13.6359	13.5125	13.6568	13.4963	13.4418	13.3235	13.5005	13.2673	13.5407	13.5095	13.2767	13.268	13.3895	13.4899	ARID1B	ARID1B	ARI1B_HUMAN	Q8NFD5	Q8NFD5	AT-rich interactive domain-containing protein 1B	NA	NA	NA	NA	16	17	17	18	18	19	20	19	19	18	18	16	19	20	16	18	17	21
		13.3645	13.0762	13.5039	13.2866	13.2057	13.024	13.2911	13.3332	13.1534	13.1789	13.4354	13.4698	13.3567	13.4313	13.4389	13.4693	13.4941	13.541	13.3594	13.4332	ARIH2	ARIH2	ARI2_HUMAN	O95376	O95376	E3 ubiquitin-protein ligase ARIH2	NA	NA	NA	NA	14	13	11	12	16	14	14	14	13	14	14	13	14	14	13	15	15	15
		14.1957	14.0649	13.9497	13.9823	14.2713	14.0546	14.1917	13.796	13.9557	14.1095	14.2047	14.0201	14.0587	13.9097	14.1731	14.0781	14.2115	14.1492	14.0726	13.9474	ARID4A	ARID4A	ARI4A_HUMAN	P29374	P29374	AT-rich interactive domain-containing protein 4A	NA	NA	NA	NA	7	8	8	8	8	9	9	8	7	8	7	8	8	5	9	8	7	7
		12.469	12.5492	12.6253	12.436	12.4002	12.6308	12.6278	12.7824	12.7475	12.8591	12.75	12.6493	12.8097	12.9149	13.0806	12.6949	12.9596	12.6917	12.6234	12.6082	ARID4B	ARID4B	ARI4B_HUMAN	Q4LE39	Q4LE39	AT-rich interactive domain-containing protein 4B	NA	NA	NA	NA	9	11	13	9	13	10	13	13	14	14	13	10	11	13	7	12	13	12
		14.2071	14.044	13.9842	13.8972	14.1468	14.016	14.2542	14.1203	14.1187	14.094	14.1591	14.0847	14.1266	14.0192	13.9988	14.1538	14.0815	14.1155	14.2623	14.123	ARID5B	ARID5B	ARI5B_HUMAN	Q14865	Q14865	AT-rich interactive domain-containing protein 5B	NA	NA	NA	NA	22	22	22	22	20	23	25	23	25	26	23	21	19	21	22	22	21	26
		12.2623	12.2077	12.4229	12.3447	12.2107	12.3067	12.4548	12.2761	12.4927	12.3806	12.2191	12.3118	12.2828	12.1716	12.3	12.2982	12.4447	12.5127	12.6344	12.3425	ARID2	ARID2	ARID2_HUMAN	Q68CP9	Q68CP9	AT-rich interactive domain-containing protein 2	NA	NA	NA	NA	9	12	10	11	10	11	11	11	12	10	12	9	11	11	9	12	10	13
		17.1928	17.3129	17.3617	17.1992	17.3889	17.3089	17.309	17.3364	17.5513	17.544	17.3443	17.4284	17.4113	17.3453	17.1825	17.3384	17.3241	17.3044	17.2709	17.4412	AKR7A2	AKR7A2	ARK72_HUMAN	O43488	O43488;Q8NHP1	Aflatoxin B1 aldehyde reductase member 2	NA	NA	NA	NA	19	22	21	19	18	20	20	20	20	21	19	19	21	20	21	20	19	22
		18.627	18.5747	18.6213	18.6415	18.559	18.5946	18.494	18.5583	18.7703	18.8298	18.7976	18.9228	18.7851	18.7015	18.7765	18.722	18.8531	18.7668	18.8299	18.7786	ARL1	ARL1	ARL1_HUMAN	P40616	P40616	ADP-ribosylation factor-like protein 1	NA	NA	NA	NA	20	21	23	22	24	26	22	25	22	25	25	23	25	23	23	22	26	25
		12.6328	12.5309	12.4708	12.4453	12.4727	12.5522	12.7269	12.6379	12.4997	12.7702	12.8006	12.4882	12.7422	12.6264	12.8081	12.5933	12.5781	12.7075	12.795	12.5541	ARL10	ARL10	ARL10_HUMAN	Q8N8L6	Q8N8L6	ADP-ribosylation factor-like protein 10	NA	NA	NA	NA	3	4	4	4	5	5	5	4	5	4	4	4	4	4	4	5	5	5
		14.2339	14.7098	14.8395	14.8138	14.8047	14.6516	14.6003	14.6619	14.63	14.7188	14.2244	14.223	13.9927	13.8216	13.9022	14.3809	13.6552	14.0085	13.8844	13.76	ARL15	ARL15	ARL15_HUMAN	Q9NXU5	Q9NXU5	ADP-ribosylation factor-like protein 15	NA	NA	NA	NA	5	5	5	4	5	4	5	4	6	4	4	5	5	4	5	5	4	5
		15.0787	15.2282	15.3836	15.369	15.291	15.2638	15.0468	15.1606	15.5443	15.3086	15.1146	15.1371	15.3568	15.1048	15.067	15.2761	15.2407	15.2845	14.9466	15.0736	ARL2	ARL2	ARL2_HUMAN	P36404	P36404	ADP-ribosylation factor-like protein 2	NA	NA	NA	NA	9	9	9	9	9	8	9	9	8	9	9	9	9	9	9	9	9	9
		17.5915	17.6227	17.7319	17.7524	17.6003	17.6414	17.7194	17.6852	17.6545	17.7352	17.6794	17.7295	17.7719	17.5893	17.601	17.6982	17.4284	17.6384	17.4642	17.5834	ARL3	ARL3	ARL3_HUMAN	P36405	P36405	ADP-ribosylation factor-like protein 3	NA	NA	NA	NA	12	12	13	14	12	14	14	13	14	14	12	12	14	14	13	14	14	12
		10.4472	10.1833	10.1592	10.6088	9.49763	10.1485	10.3691	10.4396	10.4687	10.3473	10.3399	9.8361	10.2742	10.4891	10.0801	10.0565	10.2678	9.8283	10.2518	10.2252	ARL4C	ARL4C	ARL4C_HUMAN	P56559	P56559	ADP-ribosylation factor-like protein 4C	NA	NA	NA	NA	1	1	1	1	0	1	1	1	1	1	1	1	1	1	1	1	1	1
		13.0491	12.5466	12.8165	12.7093	12.8305	12.8564	13.0168	12.8286	12.8462	12.8501	12.9392	13.2125	13.3881	13.1359	13.4071	13.2861	13.3378	13.2602	13.2393	13.1294	ARL5A.1	ARL5A	ARL5A_HUMAN	Q9Y689	Q9Y689	ADP-ribosylation factor-like protein 5A	NA	NA	NA	NA	1	1	1	1	1	1	1	1	1	1	1	1	1	1	1	1	1	1
		11.2997	12.2551	12.5555	12.5075	12.4577	12.3387	12.1436	12.2015	12.0857	12.3888	12.2875	12.0072	12.2308	11.9276	11.578	12.2691	11.6938	12.4721	11.5719	11.9093	ARL5A	ARL5A;ARL5B	ARL5A_HUMAN;ARL5B_HUMAN	Q96KC2;Q9Y689	Q9Y689;Q96KC2	ADP-ribosylation factor-like protein 5B	NA	NA	NA	NA	2	2	2	2	2	2	2	2	2	2	1	2	1	1	2	2	2	1
		10.9731	11.2136	11.3931	11.5589	11.234	11.0702	10.859	11.1454	11.0483	10.9995	10.6356	10.7044	10.5317	10.9765	10.9471	11.3901	10.7306	11.3432	10.5997	10.5928	ARL5B	ARL5B	ARL5B_HUMAN	Q96KC2	Q96KC2	ADP-ribosylation factor-like protein 5B	NA	NA	NA	NA	2	2	2	2	2	2	2	2	2	2	1	2	2	2	1	2	1	1
		12.3439	12.1601	12.0299	12.4159	12.314	12.2875	12.4017	12.4369	12.4619	12.536	12.6614	12.6816	12.8631	12.644	12.7198	12.6094	12.5388	12.6647	12.6371	12.7907	ARL6	ARL6	ARL6_HUMAN	Q9H0F7	Q9H0F7	ADP-ribosylation factor-like protein 6	NA	NA	NA	NA	7	6	8	7	8	8	7	6	8	8	8	7	8	8	7	7	8	8
		14.313	14.5876	14.3878	14.2773	14.324	14.4033	14.6407	14.4353	14.8866	14.6733	14.8051	14.847	14.8551	14.7631	14.8406	14.5337	14.7053	14.7341	14.4853	14.488	ARL8A	ARL8A	ARL8A_HUMAN	Q96BM9	Q96BM9	ADP-ribosylation factor-like protein 8A	SASP	NA	up	NA	5	6	7	7	7	6	4	7	6	6	6	5	5	4	4	6	5	4
		16.7523	16.8511	16.7923	16.8848	16.8749	17.0356	16.7581	16.9824	16.8788	16.9626	16.7502	17.0858	17.0242	17.08	16.8902	17.0838	17.211	16.9571	17.0904	17.0004	ARL8A.1	ARL8A;ARL8B	ARL8A_HUMAN;ARL8B_HUMAN	Q96BM9;Q9NVJ2	Q96BM9;Q9NVJ2	ADP-ribosylation factor-like protein 8A	SASP	NA	up	NA	10	10	11	11	11	11	11	11	11	11	10	11	11	11	11	11	9	11
		14.7775	14.9902	13.9243	14.4092	14.4505	14.781	15.0401	14.9849	15.2537	15.0961	14.9805	15.1236	14.9535	14.9081	14.7154	14.9327	15.0828	14.9951	14.8775	14.7064	ARL8B	ARL8B	ARL8B_HUMAN	Q9NVJ2	Q9NVJ2	ADP-ribosylation factor-like protein 8B	SASP	NA	up	NA	5	6	6	6	4	6	5	6	6	7	5	7	6	7	7	7	6	6
		15.1583	15.1019	15.2112	15.2068	15.0956	15.2194	15.1779	15.2166	15.1493	15.2224	15.0562	15.205	15.1516	15.2142	15.2166	15.1341	15.1247	15.2019	15.2651	15.3428	ASL	ASL	ARLY_HUMAN	P04424	P04424	Argininosuccinate lyase	SASP	NA	down	NA	23	23	22	24	24	23	22	23	23	24	24	24	23	24	23	23	24	24
		14.5683	14.6056	14.3105	14.3566	14.4738	14.6465	14.6481	14.5253	14.5808	14.4668	14.5285	14.4383	14.5553	14.4607	14.3962	14.4536	14.3218	14.4371	14.3538	14.5312	ARMC10	ARMC10	ARM10_HUMAN	Q8N2F6	Q8N2F6	Armadillo repeat-containing protein 10	NA	NA	NA	NA	12	12	10	11	11	11	11	12	12	12	11	11	12	11	11	12	12	12
		14.4574	15.0515	15.2209	15.0826	15.1255	14.9647	14.8085	14.9374	14.832	14.9178	14.4956	14.5202	14.7458	14.5739	14.6699	14.7134	14.3675	14.6028	14.359	14.522	ARMC1	ARMC1	ARMC1_HUMAN	Q9NVT9	Q9NVT9	Armadillo repeat-containing protein 1	NA	NA	NA	NA	7	8	9	8	9	10	10	10	10	10	9	6	9	8	7	9	8	9
		11.5821	10.8795	11.3648	11.2805	11.3498	11.3948	11.6832	11.298	11.515	11.5397	11.6487	10.9996	11.2353	11.0074	11.1811	11.1818	11.6043	11.5345	11.5572	11.6464	ARMC5	ARMC5	ARMC5_HUMAN	Q96C12	Q96C12	Armadillo repeat-containing protein 5	NA	NA	NA	NA	2	3	3	3	3	3	3	3	2	2	3	2	2	2	3	2	3	3
		12.7266	12.8845	12.7611	12.8005	12.8752	13.015	12.9355	12.8726	12.9683	12.9818	12.6547	12.6555	12.6263	12.8196	12.6154	12.7837	12.8606	12.8354	12.7996	12.8054	ARMC6	ARMC6	ARMC6_HUMAN	Q6NXE6	Q6NXE6	Armadillo repeat-containing protein 6	NA	NA	NA	NA	9	9	9	9	10	9	10	8	8	9	8	9	8	7	8	9	6	6
		14.4125	14.2297	14.14	14.1324	14.2046	14.3044	14.2721	14.251	14.241	14.2994	14.2701	14.2286	14.2654	14.177	14.2035	14.2619	14.1112	14.1299	14.1469	14.3088	ARMC8	ARMC8	ARMC8_HUMAN	Q8IUR7	Q8IUR7	Armadillo repeat-containing protein 8	NA	NA	NA	NA	18	21	21	20	19	20	21	19	23	21	20	18	21	20	18	19	17	18
		16.0134	15.9643	15.8503	15.9298	15.9243	16.0375	16.0633	15.9688	16.0902	15.9805	15.7582	15.7185	15.7787	15.7289	15.6906	15.7743	15.7749	15.8858	15.8301	15.8084	ARMC9	ARMC9	ARMC9_HUMAN	Q7Z3E5	Q7Z3E5	LisH domain-containing protein ARMC9	NA	NA	NA	NA	37	38	39	38	41	38	37	38	39	38	35	38	35	35	35	37	33	36
		13.6173	13.4883	13.29	13.4097	13.4568	13.5911	13.7193	13.6288	13.4671	13.5563	13.5313	13.5452	13.5654	13.5045	13.6401	13.8219	13.6022	13.5911	13.6969	13.678	ARMH3	ARMH3	ARMD3_HUMAN	Q5T2E6	Q5T2E6	Armadillo-like helical domain-containing protein 3	NA	NA	NA	NA	19	18	20	19	19	20	19	20	20	20	20	18	21	20	17	17	18	18
		15.9246	15.9461	15.9221	15.9265	16.0647	16.1597	16.0865	16.1584	16.1182	16.1458	16.1421	16.268	16.194	16.2615	16.2164	16.1283	16.3474	16.2205	16.2321	16.182	ARMT1	ARMT1	ARMT1_HUMAN	Q9H993	Q9H993	Damage-control phosphatase ARMT1	NA	NA	NA	NA	19	18	19	19	18	19	20	19	18	20	18	18	19	20	19	19	20	20
		14.0444	14.0005	13.9275	14.0001	14.0214	14.0506	14.0756	14.0669	14.0929	14.0452	14.2234	14.3362	14.3093	14.2522	14.2206	14.3823	14.1844	14.3179	14.2556	14.3811	ARMCX1	ARMCX1	ARMX1_HUMAN	Q9P291	Q9P291	Armadillo repeat-containing X-linked protein 1	NA	NA	NA	NA	11	11	13	12	12	14	13	13	14	14	14	14	13	13	13	12	14	14
		14.7076	14.9221	14.7406	14.8578	14.6427	14.7582	14.7645	14.8669	14.8691	14.8741	14.7874	14.7437	14.7813	14.6233	14.7447	14.7773	14.7876	14.6276	14.7271	14.7168	ARMCX2	ARMCX2	ARMX2_HUMAN	Q7L311	Q7L311	Armadillo repeat-containing X-linked protein 2	NA	NA	NA	NA	18	19	20	18	21	19	21	21	21	22	20	16	20	18	17	18	18	19
		16.1335	16.0849	16.2462	16.2848	16.3821	16.4208	16.2384	16.0985	16.4846	16.4069	16.0324	15.9762	16.0287	16.0227	16.0952	16.1292	16.0524	16.0865	16.0859	16.1646	ARMCX3	ARMCX3	ARMX3_HUMAN	Q9UH62	Q9UH62	Armadillo repeat-containing X-linked protein 3	NA	NA	NA	NA	18	19	18	17	17	19	19	18	19	19	19	19	20	17	17	18	18	18
		12.9152	13.0814	13.1224	13.003	13.065	13.2835	12.8653	13.1931	13.2772	13.4398	13.4609	13.5485	13.3342	13.059	13.326	13.3899	13.2786	13.4233	13.0356	13.4924	ARMCX6	ARMCX6	ARMX6_HUMAN	Q7L4S7	Q7L4S7	Protein ARMCX6	NA	NA	NA	NA	2	1	1	2	1	1	1	1	1	1	2	1	2	1	1	1	1	2
		13.6886	13.7038	13.6182	13.3512	13.6059	13.7699	13.648	13.7474	13.6369	13.5901	13.684	13.5204	13.4908	13.4922	13.4381	13.5999	13.4514	13.6239	13.5268	13.5496	ARNT	ARNT	ARNT_HUMAN	P27540	P27540	Aryl hydrocarbon receptor nuclear translocator	NA	NA	NA	NA	11	10	9	12	12	12	12	10	12	10	11	12	11	10	11	10	8	12
		12.674	12.9063	12.9388	13.0825	12.9632	12.7787	12.5926	12.7315	12.8604	12.7339	12.7193	12.778	12.6907	12.4954	12.6234	12.8108	12.7067	12.3897	12.5447	12.5136	RPS19BP1	RPS19BP1	AROS_HUMAN	Q86WX3	Q86WX3	Active regulator of SIRT1	NA	NA	NA	NA	5	5	6	5	6	5	5	6	6	5	5	6	5	5	5	4	4	5
		15.3125	14.9497	14.8389	15.0493	15.0803	15.125	15.1239	14.9664	14.9485	15.1809	15.2868	15.4422	15.4459	15.3721	15.4167	15.4564	15.3983	15.4245	15.5063	15.3859	ACTR10	ACTR10	ARP10_HUMAN	Q9NZ32	Q9NZ32	Actin-related protein 10	NA	NA	NA	NA	18	19	20	19	20	19	19	19	20	20	18	19	20	18	20	20	19	20
		14.3532	14.5443	14.8421	14.8302	14.2094	14.461	14.1199	14.3615	14.4321	14.075	14.3796	14.1286	14.274	14.1112	13.9193	13.8756	13.2203	13.7368	13.514	13.4276	ARPP19.1	ARPP19	ARP19_HUMAN	P56211	P56211	cAMP-regulated phosphoprotein 19	NA	NA	NA	NA	9	9	9	9	9	9	8	9	9	9	8	9	8	7	7	8	8	8
		14.1509	14.482	15.1557	14.6515	14.2866	14.5859	14.0857	14.4796	14.9704	14.8987	14.2987	14.5471	14.4002	14.1838	14.2148	14.1535	13.6236	14.1075	13.8173	14.0719	ARPP19	ARPP19;ENSA	ARP19_HUMAN;ENSA_HUMAN	O43768;P56211	P56211;O43768	Alpha-endosulfine	NA	NA	NA	NA	3	3	2	3	3	3	2	3	2	2	3	3	3	2	2	3	2	3
		18.6145	18.623	18.7312	18.612	18.6313	18.6623	18.5602	18.6029	18.7588	18.8232	18.7386	18.9308	18.8242	18.7706	18.7979	18.7297	18.8077	18.7672	18.8259	18.8797	ACTR2	ACTR2	ARP2_HUMAN	P61160	P61160	Actin-related protein 2	SASP	NA	altered	NA	43	47	45	47	46	47	44	43	45	44	45	46	43	46	44	43	45	46
		18.9821	18.9372	18.8848	18.8959	18.8134	18.8641	18.91	18.8673	18.9466	19.0612	18.8938	19.0397	19.0307	18.9561	18.9156	18.9729	18.9671	18.9906	18.9525	19.0049	ACTR3	ACTR3	ARP3_HUMAN	P61158	P61158	Actin-related protein 3	SASP	NA	altered	NA	38	42	40	41	38	39	37	40	40	40	38	39	36	40	34	38	39	35
		15.4935	16.4511	16.1608	17.1543	16.5514	16.7262	16.6665	16.9838	16.9257	16.8626	16.7342	16.5353	16.5494	16.1158	16.2752	16.0091	16.187	16.0895	15.7974	15.9043	ACTR3.1	ACTR3;ACTR3C	ARP3C_HUMAN;ARP3_HUMAN	P61158;Q9C0K3	Q9P1U1;Q9C0K3;P61158	Actin-related protein 3	SASP	NA	altered	NA	2	2	2	2	2	2	2	2	2	2	2	2	2	2	2	2	2	2
		12.1567	11.9428	12.0317	12.0272	12.113	11.8123	12.0367	12.0206	11.9983	12.1673	11.9889	12.2927	12.0532	12.0476	11.9607	11.9902	11.9728	12.0899	11.9056	11.896	ACTR5	ACTR5	ARP5_HUMAN	Q9H9F9	Q9H9F9	Actin-related protein 5	NA	NA	NA	NA	7	7	7	7	6	7	7	6	7	7	7	5	7	6	5	7	7	7
		16.4487	16.2883	16.4883	16.227	16.5582	16.4585	16.5715	16.6053	16.6088	16.6653	16.6417	16.74	16.7736	16.7215	16.7496	16.8256	16.6835	16.6691	16.7078	16.801	ARPC5L	ARPC5L	ARP5L_HUMAN	Q9BPX5	Q9BPX5	Actin-related protein 2/3 complex subunit 5-like protein	SASP	NA	up	NA	6	6	6	6	6	6	6	6	6	6	6	6	6	6	6	6	6	6
		17.0685	17.5213	17.5427	17.6655	17.5527	17.3756	17.4922	17.4398	17.5633	17.7709	17.2493	17.383	17.397	17.3401	17.1994	17.6768	17.359	17.1244	17.1237	17.1956	ARPC5.1	ARPC5;ARPC5L	ARP5L_HUMAN;ARPC5_HUMAN	O15511;Q9BPX5	Q9BPX5;O15511	Actin-related protein 2/3 complex subunit 5	SASP	NA	altered;up	NA	2	3	2	3	3	3	2	2	3	3	2	3	3	3	1	3	3	3
		12.3298	12.4373	12.6897	12.6188	12.4546	12.3241	12.2553	12.5124	12.378	12.3452	12.3297	12.375	12.1758	12.2272	12.2489	12.5051	12.4929	12.2063	12.3529	12.2733	ACTR6	ACTR6	ARP6_HUMAN	Q9GZN1	Q9GZN1	Actin-related protein 6	NA	NA	NA	NA	5	5	5	5	5	5	5	5	5	5	4	3	3	3	3	4	3	3
		12.7943	12.7924	12.4209	12.4868	12.5259	12.5838	12.9851	12.7788	12.5976	12.6489	12.4228	12.5533	12.6323	12.6408	12.1343	12.6367	12.5529	12.223	12.3052	12.5983	ACTR8	ACTR8	ARP8_HUMAN	Q9H981	Q9H981	Actin-related protein 8	NA	NA	NA	NA	6	5	6	3	5	6	5	5	5	6	2	5	4	5	4	5	4	3
		18.8626	18.9534	18.9144	19.0168	18.8767	18.9013	18.8644	18.96	19.1005	19.0485	18.8764	19.0508	18.9831	18.8936	18.8009	18.8729	18.9197	18.7714	18.8395	18.9669	ARPC2	ARPC2	ARPC2_HUMAN	O15144	O15144	Actin-related protein 2/3 complex subunit 2	SASP	NA	altered	NA	43	44	42	40	42	40	43	41	44	42	42	43	43	43	43	43	44	42
		18.6961	18.6498	18.535	18.6239	18.5762	18.6789	18.7052	18.7245	18.9165	18.7613	18.7574	18.7304	18.7597	18.7245	18.7546	18.5932	18.6238	18.7319	18.6882	18.6864	ARPC3	ARPC3	ARPC3_HUMAN	O15145	O15145	Actin-related protein 2/3 complex subunit 3	SASP	NA	altered	NA	23	23	22	23	23	23	23	23	22	22	22	22	23	23	23	22	23	22
		18.9688	19.1497	19.4931	19.4274	19.1916	19.1759	18.945	18.9711	19.1122	19.181	18.8898	19.0974	19.1108	19.0199	18.9567	19.0452	19.0452	18.8244	19.0055	19.0801	ARPC4	ARPC4	ARPC4_HUMAN	P59998	P59998	Actin-related protein 2/3 complex subunit 4	SASP	NA	altered	NA	16	17	18	17	17	17	14	15	16	17	14	16	14	12	15	14	14	15
		17.1683	17.3218	17.411	17.4974	17.4215	17.237	17.0658	17.1848	17.3626	17.5551	17.3168	17.5819	17.4909	17.3756	17.2604	17.3271	17.3342	17.2511	17.3267	17.4468	ARPC5	ARPC5	ARPC5_HUMAN	O15511	O15511	Actin-related protein 2/3 complex subunit 5	SASP	NA	altered	NA	14	15	16	15	14	15	16	15	15	15	16	16	15	16	16	15	16	15
		14.3941	14.7732	14.9936	14.9369	14.8416	14.7551	14.6234	14.8675	14.7107	14.7614	14.3249	14.5468	14.5227	14.2298	14.2102	14.6543	14.3319	14.3377	14.2827	14.2913	ARPIN	ARPIN	ARPIN_HUMAN	Q7Z6K5	Q7Z6K5	Arpin	NA	NA	NA	NA	9	10	9	10	9	10	10	9	10	10	9	9	9	9	8	9	8	9
		13.4063	13.2623	13.2791	13.3363	13.3201	13.3841	13.3458	13.484	13.3186	13.359	13.3931	13.3578	13.6213	13.3391	13.5443	13.6072	13.6011	13.3766	13.6214	13.822	ARRB1	ARRB1	ARRB1_HUMAN	P49407	P49407	Beta-arrestin-1	NA	NA	NA	NA	8	12	11	10	11	9	10	9	11	11	12	9	13	11	10	13	13	11
		11.8328	11.5131	11.4384	11.4057	11.8362	11.6294	11.5687	11.7278	11.7379	11.6799	11.4477	11.7216	11.3422	11.374	11.6011	11.6736	11.9083	11.5728	11.6277	11.3462	ARRB2	ARRB2	ARRB2_HUMAN	P32121	P32121	Beta-arrestin-2	NA	NA	NA	NA	6	6	7	9	5	8	8	8	7	9	7	4	6	6	4	8	4	9
		11.2177	10.9737	10.6252	11.1828	10.9895	10.9064	11.1159	11.2682	10.9774	11.1597	10.616	11.6187	11.0134	10.9509	11.1175	9.70769	11.3054	11.9978	11.816	11.7126	ARR3	ARR3	ARRC_HUMAN	P36575	P36575	Arrestin-C	NA	NA	NA	NA	1	2	1	1	2	1	1	1	1	2	1	2	1	1	2	0	1	2
		12.8065	12.7176	13.0598	13.2056	12.733	12.8445	12.772	12.817	12.7531	12.7776	12.5943	12.9509	12.7491	12.5187	12.5359	12.7524	12.5294	12.5713	12.5796	12.4223	ARRDC1	ARRDC1	ARRD1_HUMAN	Q8N5I2	Q8N5I2	Arrestin domain-containing protein 1	NA	NA	NA	NA	7	8	7	6	9	9	8	8	8	8	6	6	6	7	9	9	6	8
		15.955	15.9656	16.0997	16.0841	16.0566	16.146	16.1322	16.1898	16.2369	16.2336	16.7913	16.8485	16.6851	16.792	16.5769	16.6224	16.8286	16.6706	16.7135	16.7837	ARSA	ARSA	ARSA_HUMAN	P15289	P15289	Arylsulfatase A	SASP	NA	down	NA	14	18	18	17	18	19	18	15	19	19	19	19	18	19	19	17	18	18
		14.1641	14.2514	14.209	14.3108	14.4266	14.4541	14.5101	14.495	14.2476	14.4139	14.7663	14.9161	14.8563	14.9017	14.8003	14.9235	14.8534	14.9793	14.7784	14.8772	ARSB	ARSB	ARSB_HUMAN	P15848	P15848	Arylsulfatase B	NA	NA	NA	NA	13	14	14	14	15	13	14	15	14	15	14	15	14	15	14	15	11	15
		13.1327	13.016	12.6472	12.8523	13.0926	12.8839	12.8909	13.0517	12.9029	12.8172	13.1437	13.2663	13.1014	13.2562	13.2256	13.1892	13.1798	13.2254	13.3385	13.1376	ARSD	ARSD	ARSD_HUMAN	P51689	P51689	Arylsulfatase D	NA	NA	NA	NA	8	9	8	8	7	8	9	9	8	8	8	7	7	9	8	8	8	8
		9.23839	8.9622	9.09251	11.5362	8.9286	9.4805	7.64106	8.65061	9.18243	9.23497	10.2702	10.0571	8.72618	8.78824	9.7256	9.58809	9.40025	9.03874	9.484	9.52919	ARSJ	ARSJ	ARSJ_HUMAN	Q5FYB0	Q5FYB0	Arylsulfatase J	NA	NA	NA	NA	1	1	1	0	1	1	1	1	1	1	0	0	1	1	0	1	1	1
		14.0355	13.84	13.9301	13.8963	13.8329	13.9402	14.1942	14.1164	14.0789	13.9732	14.1076	14.3749	14.1563	14.13	14.0972	14.1621	14.2417	14.2112	14.097	14.2968	ARSK	ARSK	ARSK_HUMAN	Q6UWY0	Q6UWY0	Arylsulfatase K	NA	NA	NA	NA	8	10	10	11	9	11	10	11	11	11	10	9	9	10	10	11	10	10
		9.16935	10.1875	9.96208	10.5486	10.4397	10.4351	10.3318	10.0283	10.4952	10.4979	9.96215	10.4091	10.578	10.5646	10.2004	10.8082	11.213	10.7272	10.3554	10.8098	ARSL	ARSL	ARSL_HUMAN	P51690	P51690	Arylsulfatase L	NA	NA	NA	NA	0	3	4	4	2	3	4	2	4	2	1	1	2	2	2	3	1	2
		11.5836	10.739	10.6905	10.4621	10.8411	11.1121	11.0453	10.3911	11.1724	10.4356	11.3358	11.3032	11.2907	10.9984	10.888	11.0078	11.0729	11.3765	10.7522	11.036	ARV1	ARV1	ARV1_HUMAN	Q9H2C2	Q9H2C2	Protein ARV1	NA	NA	NA	NA	2	3	2	3	3	3	3	1	3	2	1	1	2	2	2	2	2	2
		12.1818	11.8014	11.578	12.1143	11.9623	12.024	11.7476	12.0955	12.112	11.9212	12.2587	12.1411	12.1465	12.0032	12.0317	12.1247	11.9888	11.7167	11.9315	11.8345	ARVCF	ARVCF	ARVC_HUMAN	O00192	O00192	Armadillo repeat protein deleted in velo-cardio-facial syndrome	NA	NA	NA	NA	6	6	6	5	6	6	6	5	5	6	5	5	5	5	5	5	5	5
		13.6203	13.7416	13.7566	13.7824	13.8755	13.7101	13.8147	13.7235	13.7391	13.6837	13.6858	13.7902	13.5947	13.5809	13.7121	13.7387	13.5887	13.726	13.6262	13.7033	NAT1	NAT1	ARY1_HUMAN	P18440	P18440	Arylamine N-acetyltransferase 1	NA	NA	NA	NA	10	11	13	12	11	12	12	11	13	12	10	10	10	10	8	11	9	10
		12.3851	12.9016	13.7727	12.9527	12.7507	12.7858	12.8849	13.4816	12.4904	12.429	10.9418	10.6265	11.8652	12.4979	9.45837	12.3104	9.53913	12.0128	10.6376	12.3227	AS3MT	AS3MT	AS3MT_HUMAN	Q9HBK9	Q9HBK9	Arsenite methyltransferase	NA	NA	NA	NA	2	3	3	2	1	3	4	2	3	3	1	0	3	1	0	2	0	3
		15.4887	15.982	15.8057	15.9899	15.8597	15.9115	15.9496	15.9401	15.9552	16.0153	16.1665	16.2845	16.227	16.1817	16.0658	16.2082	16.1442	16.3366	16.1118	16.2293	ASAH1	ASAH1	ASAH1_HUMAN	Q13510	Q13510	Acid ceramidase	SASP	NA	down	NA	12	12	12	15	13	14	14	14	15	13	16	14	14	14	11	12	15	17
		14.7311	14.6603	14.6327	14.7739	14.687	14.7081	14.6986	14.7249	14.7124	14.6653	14.6831	14.6093	14.7331	14.6472	14.6128	14.7029	14.4796	14.6249	14.5057	14.5635	ASAP1.1	ASAP1	ASAP1_HUMAN	Q9ULH1	Q9ULH1	Arf-GAP with SH3 domain, ANK repeat and PH domain-containing protein 1	NA	NA	NA	NA	38	39	39	38	39	41	41	42	39	39	40	38	39	36	39	41	36	39
		12.3644	12.3972	12.2322	12.4444	12.0753	12.4288	12.4238	12.1739	12.5156	12.1744	11.8145	12.0944	12.1664	12.0469	11.9367	11.5431	11.4567	11.2973	11.3902	10.8999	ASAP1	ASAP1;ASAP2	ASAP1_HUMAN;ASAP2_HUMAN	O43150;Q9ULH1	Q9ULH1;O43150	Arf-GAP with SH3 domain, ANK repeat and PH domain-containing protein 2	NA	NA	NA	NA	2	3	3	3	3	3	3	2	3	3	3	2	3	2	2	2	2	2
		13.8139	13.7199	13.6976	13.8705	13.7942	13.8819	14.0016	13.8792	13.8809	13.892	14.025	14.0165	14.0511	14.0588	13.9823	13.9396	13.8756	13.9289	13.8878	13.9888	ASAP2	ASAP2	ASAP2_HUMAN	O43150	O43150	Arf-GAP with SH3 domain, ANK repeat and PH domain-containing protein 2	NA	NA	NA	NA	27	29	29	28	28	27	27	28	29	30	26	27	29	26	25	28	26	25
		13.4407	13.3299	13.3657	13.1904	13.4846	13.4559	13.3279	13.5334	13.5089	13.416	13.2653	13.2563	13.3043	13.4187	13.3189	13.5195	13.4223	13.397	13.4265	13.4462	ASAP3	ASAP3	ASAP3_HUMAN	Q8TDY4	Q8TDY4	Arf-GAP with SH3 domain, ANK repeat and PH domain-containing protein 3	NA	NA	NA	NA	11	13	10	12	10	12	10	11	12	12	12	12	13	12	11	12	11	13
		12.2675	11.9812	12.0701	11.8123	12.0594	12.4638	12.3263	12.4535	12.4449	12.3585	12.7793	12.8381	12.6487	12.8472	12.871	12.4762	12.6562	12.7235	12.6128	12.7146	ASB1	ASB1	ASB1_HUMAN	Q9Y576	Q9Y576	Ankyrin repeat and SOCS box protein 1	NA	NA	NA	NA	6	7	4	6	8	5	5	7	7	7	7	7	5	6	5	8	6	6
		11.0935	10.9592	10.8683	10.9094	10.4352	10.6966	10.9703	10.7248	10.9837	10.7133	11.254	11.5436	11.1353	11.364	11.1305	11.2322	11.2792	11.039	11.1196	11.4037	ASB3	ASB3	ASB3_HUMAN	Q9Y575	Q9Y575	Ankyrin repeat and SOCS box protein 3	NA	NA	NA	NA	2	3	3	3	2	3	2	2	3	3	2	2	3	3	3	2	2	2
		11.8103	11.7663	11.9377	11.9819	11.9617	11.7314	11.2904	11.8342	10.8761	12.0403	12.0051	12.0033	11.6557	11.7093	11.5927	11.5899	11.9822	11.7616	11.5871	11.442	ASB6	ASB6	ASB6_HUMAN	Q9NWX5	Q9NWX5	Ankyrin repeat and SOCS box protein 6	NA	NA	NA	NA	3	2	2	2	2	2	2	2	1	2	2	2	1	2	2	2	2	2
		11.8833	11.378	11.0992	10.6695	11.5159	11.2985	11.8269	11.8566	11.135	11.2258	11.6415	11.3744	11.267	11.0561	11.7055	11.6003	11.7858	11.7961	11.9019	11.5629	ASB7	ASB7	ASB7_HUMAN	Q9H672	Q9H672	Ankyrin repeat and SOCS box protein 7	NA	NA	NA	NA	2	2	2	1	2	2	1	2	2	2	2	2	2	2	1	2	2	1
		9.34467	9.66619	9.13813	9.36815	9.7789	10.0335	9.69897	8.5453	9.57057	8.83525	10.0454	9.40745	9.38195	10.1827	10.0126	9.64074	9.59615	10.3903	10.382	10.5293	ASB9	ASB9	ASB9_HUMAN	Q96DX5	Q96DX5	Ankyrin repeat and SOCS box protein 9	NA	NA	NA	NA	1	1	1	1	1	1	1	1	1	1	1	1	1	1	1	1	1	1
		15.8281	15.6088	15.389	15.7952	15.6691	16.0292	15.939	15.7892	15.8795	15.8059	15.8762	15.558	15.8468	15.6918	15.7143	15.48	15.5323	15.8015	15.7597	15.7621	PYCARD	PYCARD	ASC_HUMAN	Q9ULZ3	Q9ULZ3	Apoptosis-associated speck-like protein containing a CARD	NA	NA	NA	NA	10	9	8	9	10	11	11	9	11	11	11	9	10	11	9	11	10	11
		15.2211	15.237	15.4171	15.2666	15.3436	15.2318	15.3825	15.3493	15.2534	15.4054	15.2901	15.405	15.3268	15.2834	15.2003	15.3542	15.2517	15.2263	15.2322	15.2592	ASCC1	ASCC1	ASCC1_HUMAN	Q8N9N2	Q8N9N2	Activating signal cointegrator 1 complex subunit 1	NA	NA	NA	NA	12	11	11	11	11	12	12	12	12	12	12	12	12	12	11	12	10	11
		15.6506	15.3005	15.2979	15.1324	15.4467	15.5474	15.5019	15.3795	15.471	15.4259	15.6672	15.567	15.6086	15.4796	15.5462	15.4706	15.4024	15.355	15.5094	15.4103	ASCC2	ASCC2	ASCC2_HUMAN	Q9H1I8	Q9H1I8	Activating signal cointegrator 1 complex subunit 2	NA	NA	NA	NA	22	22	21	23	22	23	23	23	24	22	22	23	23	23	19	22	21	21
		16.0266	16.0083	15.9485	15.9882	15.9974	16.0163	16.0423	16.0319	15.9691	16.0136	16.1266	16.2339	16.2099	16.1699	16.1838	16.2087	16.1027	16.0936	16.1343	16.2009	ASCC3	ASCC3	ASCC3_HUMAN	Q8N3C0	Q8N3C0	Activating signal cointegrator 1 complex subunit 3	SASP	NA	up	NA	104	112	106	107	108	112	112	108	110	112	107	109	107	108	104	105	99	107
		13.8809	14.0958	14.1783	14.0897	14.2565	14.0118	14.0896	14.3101	14.0438	13.9837	13.7487	14.0753	13.8787	14.0162	14.0476	13.9786	13.9674	14.0438	13.9763	14.0779	ASF1A	ASF1A	ASF1A_HUMAN	Q9Y294	Q9Y294	Histone chaperone ASF1A	NA	NA	NA	NA	3	4	4	3	4	4	4	4	4	4	4	4	4	4	3	4	4	4
		10.8942	10.9383	10.9648	10.6764	10.5476	11.0939	10.7462	11.2527	11.0352	10.4103	11.1633	11.3936	11.2592	11.4757	10.7814	11.304	11.1616	11.0231	10.7798	10.9589	ASH1L	ASH1L	ASH1L_HUMAN	Q9NR48	Q9NR48	Histone-lysine N-methyltransferase ASH1L	NA	NA	NA	NA	3	3	4	4	2	3	3	4	4	3	5	5	4	5	3	4	5	4
		14.1452	13.9889	13.7598	13.8191	14.0524	13.9705	14.1035	14.024	14.0667	14.1678	13.9795	13.9805	14.0463	14.0619	14.0687	14.0046	14.0718	14.0475	13.8028	13.9811	ASH2L	ASH2L	ASH2L_HUMAN	Q9UBL3	Q9UBL3	Set1/Ash2 histone methyltransferase complex subunit ASH2	NA	NA	NA	NA	15	14	14	14	14	14	14	14	14	14	14	12	13	15	13	14	13	11
		11.8302	11.6574	11.6626	11.377	11.7976	11.911	11.9451	11.9476	11.9874	11.8985	11.9595	11.9297	12.1153	11.8471	11.8081	11.8176	11.7429	12.0283	12.0015	11.9784	C2orf49	C2orf49	ASHWN_HUMAN	Q9BVC5	Q9BVC5	Ashwin	NA	NA	NA	NA	6	6	6	6	6	6	6	6	6	6	6	6	5	6	6	6	6	6
		13.2644	13.4961	13.4629	13.4358	13.4844	13.5368	13.3752	13.4452	13.5613	13.4382	13.5154	13.6254	13.5027	13.4759	13.4817	13.5245	13.421	13.5465	13.3625	13.3813	SMPD1	SMPD1	ASM_HUMAN	P17405	P17405	Sphingomyelin phosphodiesterase	SASP	NA	up	NA	6	7	8	8	7	8	8	9	7	8	8	9	8	7	8	9	8	7
		15.1841	15.238	15.457	15.4405	15.5247	15.4673	15.476	15.6503	15.5609	15.4653	15.0715	15.1386	15.0566	15.0039	14.9049	15.2219	15.2691	15.1316	15.1289	15.2113	SMPDL3A	SMPDL3A	ASM3A_HUMAN	Q92484	Q92484	Acid sphingomyelinase-like phosphodiesterase 3a	NA	NA	NA	NA	13	14	15	14	13	14	13	14	12	14	9	11	14	15	12	13	13	14
		15.134	14.9522	14.7328	14.7241	14.905	14.9997	15.0951	14.8727	15.0247	14.9973	15.2245	15.097	15.1324	15.0948	15.1186	15.0092	15.1597	15.1933	15.1631	15.0781	ASMTL	ASMTL	ASML_HUMAN	O95671	O95671	Probable bifunctional dTTP/UTP pyrophosphatase/methyltransferase protein	NA	NA	NA	NA	32	31	27	28	30	30	30	31	31	31	28	29	32	26	29	31	31	31
		12.1713	12.1706	12.1044	12.2457	12.286	12.232	12.4414	12.4189	12.2276	12.3652	12.0526	12.3075	12.3036	12.2337	11.9493	12.3479	12.2124	12.2016	12.2309	11.8645	ASNSD1	ASNSD1	ASND1_HUMAN	Q9NWL6	Q9NWL6	Asparagine synthetase domain-containing protein 1	NA	NA	NA	NA	3	4	3	3	4	4	3	4	4	3	3	3	3	3	3	3	3	3
		15.7823	15.6992	15.65	15.613	15.6365	15.4869	15.636	15.6303	15.5776	15.7748	15.7677	15.8837	15.8799	15.7889	15.8908	15.7895	15.6178	15.631	15.4186	15.5913	ASNS	ASNS	ASNS_HUMAN	P08243	P08243	Asparagine synthetase [glutamine-hydrolyzing]	NA	NA	NA	NA	33	36	36	33	33	36	32	33	38	36	36	37	36	36	31	34	34	35
		15.0359	14.8071	14.7747	14.9176	15.0527	14.9171	14.8862	14.8899	14.9031	14.8705	15.0001	14.9096	15.0406	15.0095	14.9857	14.9228	14.9194	14.9803	14.9615	14.9565	ASPSCR1	ASPSCR1	ASPC1_HUMAN	Q9BZE9	Q9BZE9	Tether containing UBX domain for GLUT4	NA	NA	NA	NA	15	17	15	16	13	16	17	15	15	17	16	17	16	14	14	15	16	14
		15.5809	15.6229	15.7596	15.6061	15.7186	15.7176	15.6931	15.5492	15.8354	15.8178	16.0089	15.9775	15.8988	15.7929	15.756	15.8592	15.5268	15.7404	15.7098	15.4718	AGA	AGA	ASPG_HUMAN	P20933	P20933	N(4)-(beta-N-acetylglucosaminyl)-L-asparaginase	NA	NA	NA	NA	4	4	4	4	4	4	4	4	4	4	4	4	4	4	4	4	4	4
		17.9017	17.7933	17.7649	17.7672	17.834	17.889	17.9322	17.8502	17.9736	17.963	17.8024	17.8801	17.8146	17.8233	17.7767	17.8342	17.8117	17.8739	17.8535	17.9359	ASPH	ASPH	ASPH_HUMAN	Q12797	Q12797	Aspartyl/asparaginyl beta-hydroxylase	SASP	NA	up	NA	54	55	53	54	53	56	54	55	54	54	55	56	54	56	54	56	55	56
		16.4242	16.3242	16.2043	16.3808	16.4393	16.6033	16.4977	16.3395	16.41	16.4425	16.464	16.3788	16.5019	16.3187	16.3129	16.5971	16.1749	16.2398	16.3014	16.3196	TP53BP2	TP53BP2	ASPP2_HUMAN	Q13625	Q13625	Apoptosis-stimulating of p53 protein 2	NA	NA	NA	NA	17	17	18	18	17	19	19	19	20	19	20	19	19	17	18	19	18	17
		17.5894	17.6702	17.6104	17.8222	17.5941	17.6388	17.5618	17.791	17.7318	17.7831	17.9547	18.1388	18.1065	18.0139	17.9783	18.0564	18.0626	18.0206	17.953	17.9853	ASS1	ASS1	ASSY_HUMAN	P00966	P00966	Argininosuccinate synthase	NA	NA	NA	NA	33	34	33	35	32	36	33	34	36	37	35	36	35	36	37	37	37	35
		13.0396	12.7584	12.72	12.7407	12.9116	12.9819	13.0417	12.9125	12.9967	12.9601	13.2509	13.2064	13.4046	12.9932	13.3333	13.2168	13.4703	12.8448	13.0845	13.0741	GRAMD1A	GRAMD1A	ASTRA_HUMAN	Q96CP6	Q96CP6	Protein Aster-A	NA	NA	NA	NA	4	4	4	4	4	4	4	4	4	4	4	4	4	4	4	4	3	4
		10.6052	10.7011	10.9569	10.568	10.8645	10.8599	11.1872	10.9148	10.9193	11.0916	11.2979	11.2186	10.6763	11.4089	11.3133	11.2126	11.2816	11.2212	11.2979	11.4894	GRAMD1B	GRAMD1B	ASTRB_HUMAN	Q3KR37	Q3KR37	Protein Aster-B	NA	NA	NA	NA	3	5	4	1	3	5	4	4	4	6	5	3	3	3	3	4	3	4
		13.7142	13.7539	13.8368	13.8722	13.7487	13.7921	13.7519	13.7601	13.6914	13.6832	13.8805	13.8094	13.7136	13.773	13.6129	13.4341	13.451	13.4308	13.2119	13.2109	ASDURF	ASDURF	ASURF_HUMAN	L0R819	L0R819	ASNSD1 upstream open reading frame protein	NA	NA	NA	NA	7	7	7	7	7	6	7	7	7	7	6	5	7	6	4	7	4	5
		10.2994	10.4618	10.8883	10.3481	10.7998	10.3651	10.6078	10.3306	10.2827	10.5239	10.525	10.3563	11.0151	10.6507	10.9401	11.0204	10.4877	11.2767	10.5712	10.5164	ATP11A	ATP11A	AT11A_HUMAN	P98196	P98196	Probable phospholipid-transporting ATPase IH	NA	NA	NA	NA	2	2	0	2	2	2	3	2	1	1	1	3	2	1	1	2	1	2
		10.2732	10.4552	10.186	10.9017	10.381	10.7811	10.7564	10.5179	10.7884	10.2605	11.2898	11.3222	10.7439	10.0193	11.0825	10.9759	10.969	10.7998	11.0216	10.8823	ATP11A.2	ATP11A;ATP11B	AT11A_HUMAN;AT11B_HUMAN	P98196;Q9Y2G3	P98196;Q9Y2G3	Probable phospholipid-transporting ATPase IH	NA	NA	NA	NA	1	1	0	1	1	1	1	1	1	0	1	1	0	0	1	1	1	1
		14.244	14.3794	14.3361	14.4379	14.6182	14.2836	14.4483	14.2878	14.3744	14.416	14.2719	14.5055	14.3617	14.3338	14.2666	14.4585	14.3204	14.1768	14.2262	14.4243	ATP11A.1	ATP11A;ATP11B;ATP11C	AT11A_HUMAN;AT11B_HUMAN;AT11C_HUMAN	P98196;Q8NB49;Q9Y2G3	P98196;Q9Y2G3;Q8NB49	Probable phospholipid-transporting ATPase IH	NA	NA	NA	NA	1	1	1	1	1	1	1	1	1	1	1	1	1	1	1	1	1	1
		12.7624	12.8861	12.8155	12.9543	12.8906	12.9076	12.8113	12.7871	12.6561	12.8895	12.9157	12.8566	12.9161	12.8914	13.0035	12.9552	12.9382	13.0068	12.9141	12.728	ATP11B	ATP11B	AT11B_HUMAN	Q9Y2G3	Q9Y2G3	Probable phospholipid-transporting ATPase IF	NA	NA	NA	NA	10	15	15	14	15	15	16	17	15	13	15	15	15	14	10	16	13	13
		14.8153	14.702	14.6914	14.6741	14.7966	14.7056	14.8546	14.847	14.7827	14.8515	14.7056	14.8148	14.7031	14.713	14.6371	14.765	14.6878	14.6611	14.7224	14.6386	ATP11C	ATP11C	AT11C_HUMAN	Q8NB49	Q8NB49	Phospholipid-transporting ATPase IG	NA	NA	NA	NA	25	23	25	24	24	25	25	25	27	26	23	22	27	25	22	24	24	24
		16.2444	16.4407	16.6222	16.5787	16.7148	16.4117	16.2424	16.5273	16.64	16.3998	15.9318	15.9466	15.8316	15.5916	15.5341	15.7391	15.8443	15.3067	15.1676	15.4869	ATP12A	ATP12A;ATP1A1;ATP1A4	AT12A_HUMAN;AT1A1_HUMAN;AT1A4_HUMAN	P05023;P54707;Q13733	P54707;P05023;P50993;P13637;Q13733;P20648	Sodium/potassium-transporting ATPase subunit alpha-1	SASP	NA	altered	NA	8	8	8	8	8	8	8	8	8	8	8	8	8	8	8	8	8	8
		15.6977	15.8529	15.8082	15.8899	15.8891	15.822	15.8594	15.8989	15.8747	15.8766	15.9138	15.9851	15.8969	15.9253	15.7244	15.8952	15.7323	15.8013	15.6455	15.6983	ATP13A1	ATP13A1	AT131_HUMAN	Q9HD20	Q9HD20	Endoplasmic reticulum transmembrane helix translocase	NA	NA	NA	NA	40	42	39	40	39	39	40	39	40	39	40	39	40	39	37	38	38	41
		12.162	12.2974	12.0871	12.0948	12.206	12.2549	12.056	12.1087	12.0053	12.1068	12.2871	12.4167	12.4551	12.3547	12.5728	12.4381	12.3671	12.1656	12.3996	12.503	ATP13A3	ATP13A3	AT133_HUMAN	Q9H7F0	Q9H7F0	Probable cation-transporting ATPase 13A3	NA	NA	NA	NA	12	12	13	13	13	11	13	14	12	15	15	15	14	15	13	14	13	14
		17.8868	17.796	17.9479	17.9202	17.9728	17.9584	17.9242	17.9332	18.0202	18.0413	17.8699	17.8319	17.8089	17.8024	17.7696	17.8524	17.7819	17.736	17.7206	17.7461	ATP1A1	ATP1A1	AT1A1_HUMAN	P05023	P05023	Sodium/potassium-transporting ATPase subunit alpha-1	SASP	NA	altered	NA	60	62	60	62	64	63	64	64	64	62	63	60	62	61	62	61	63	62
		15.279	15.4321	15.8317	15.5314	15.7169	15.7549	15.4442	15.3798	16.1355	15.9734	15.2394	15.232	15.0087	15.2359	15.3166	15.1978	15.0785	15.1266	15.0203	15.1711	ATP1A1.1	ATP1A1;ATP1A4	AT1A1_HUMAN;AT1A4_HUMAN	P05023;Q13733	P05023;P50993;P13637;Q13733	Sodium/potassium-transporting ATPase subunit alpha-1	SASP	NA	altered	NA	3	3	3	3	3	3	3	3	3	3	3	3	3	2	2	3	3	3
		15.824	15.7896	15.6536	15.7829	15.7729	15.6568	15.7431	15.628	15.6841	15.7737	15.5982	15.5696	15.5653	15.457	15.339	15.6068	15.5407	15.2669	15.2218	15.2074	ATP1B1	ATP1B1	AT1B1_HUMAN	P05026	P05026	Sodium/potassium-transporting ATPase subunit beta-1	NA	NA	NA	NA	12	11	12	12	12	11	12	12	12	10	10	12	11	12	11	12	12	11
		17.5384	17.5138	17.6291	17.6734	17.5821	17.6283	17.5707	17.6086	17.6817	17.6034	17.5047	17.4798	17.4411	17.4309	17.3873	17.4849	17.4102	17.3878	17.3173	17.3838	ATP1B3	ATP1B3	AT1B3_HUMAN	P54709	P54709	Sodium/potassium-transporting ATPase subunit beta-3	NA	NA	NA	NA	21	21	20	21	20	19	21	21	21	21	21	20	20	20	18	20	18	20
		11.891	12.9444	8.81259	12.6611	12.9026	12.5695	12.8131	12.897	12.6965	11.5591	12.1411	11.9451	12.2681	12.8761	11.2705	10.4911	11.2538	11.6622	12.7479	12.99	ATP2A1	ATP2A1	AT2A1_HUMAN	O14983	O14983	Sarcoplasmic/endoplasmic reticulum calcium ATPase 1	NA	NA	NA	NA	3	1	0	1	1	1	1	1	1	1	6	3	4	7	2	3	3	1
		16.5209	16.776	17.0353	16.9918	16.9567	16.791	16.5603	16.8452	17.0629	17.0665	16.6696	16.8364	16.9574	16.8375	16.6088	16.708	16.7111	16.6494	16.6117	16.592	ATP2A1.1	ATP2A1;ATP2A2	AT2A1_HUMAN;AT2A2_HUMAN	O14983;P16615	O14983;P16615	Sarcoplasmic/endoplasmic reticulum calcium ATPase 1	NA	NA	NA	NA	16	19	18	19	16	19	17	18	19	19	19	19	19	19	18	18	19	19
		15.7761	16.0945	16.325	15.9665	16.203	16.1144	15.968	15.9308	16.4646	16.4415	15.9188	16.1426	15.9316	16.2493	15.954	15.8557	16.0535	15.8543	15.7246	15.7752	ATP2A1.2	ATP2A1;ATP2A2;ATP2A3	AT2A1_HUMAN;AT2A2_HUMAN;AT2A3_HUMAN	O14983;P16615;Q93084	O14983;P16615;Q93084	Sarcoplasmic/endoplasmic reticulum calcium ATPase 1	SASP	NA	down	NA	11	11	11	11	11	11	11	11	11	11	11	11	11	11	11	11	11	11
		17.7229	17.7106	17.6798	17.6474	17.6812	17.7064	17.6953	17.6391	17.7227	17.789	17.7047	17.7136	17.7318	17.7292	17.6086	17.642	17.6873	17.5869	17.5174	17.5973	ATP2A2	ATP2A2	AT2A2_HUMAN	P16615	P16615	Sarcoplasmic/endoplasmic reticulum calcium ATPase 2	NA	NA	NA	NA	53	54	54	54	50	53	54	53	54	54	51	52	51	53	50	52	51	52
		15.1306	14.6376	13.7302	14.1885	14.6127	14.5628	14.9491	14.049	14.4374	14.7628	15.2693	15.2417	15.0007	14.9805	15.0707	14.741	14.9478	15.2468	14.9271	15.0126	ATP2A2.1	ATP2A2;ATP2A3	AT2A2_HUMAN;AT2A3_HUMAN	P16615;Q93084	P16615;Q93084	Sarcoplasmic/endoplasmic reticulum calcium ATPase 2	SASP	NA	down	NA	3	3	3	3	3	3	3	2	3	3	3	3	3	3	3	3	3	3
		11.397	11.2237	11.0097	10.9715	11.117	11.0123	11.35	11.2718	10.8139	11.0288	11.7038	11.79	11.1678	11.6124	11.4214	11.4744	11.603	11.0614	11.2565	10.8926	ATP2A3	ATP2A3	AT2A3_HUMAN	Q93084	Q93084	Sarcoplasmic/endoplasmic reticulum calcium ATPase 3	SASP	NA	down	NA	2	3	2	3	2	1	2	2	2	3	1	2	2	3	3	4	2	3
		16.9968	16.9136	17.0264	16.9638	17.0321	16.9832	16.9633	16.9699	17.018	16.9802	17.2404	17.2511	17.2186	17.2065	17.2029	17.2294	17.116	17.1071	17.184	17.12	ATP2B1	ATP2B1	AT2B1_HUMAN	P20020	P20020	Plasma membrane calcium-transporting ATPase 1	NA	NA	NA	NA	39	40	38	40	41	41	41	38	42	44	44	41	47	46	42	43	46	45
		16.152	15.7243	16.1214	15.8133	15.7826	15.9185	15.6685	15.4842	15.3177	15.2082	14.9862	14.5363	14.3054	14.1385	14.295	13.9186	13.9889	13.7613	13.8296	13.8598	ATP2B1.3	ATP2B1;ATP2B2	AT2B1_HUMAN;AT2B2_HUMAN	P20020;Q01814	P20020;Q01814	Plasma membrane calcium-transporting ATPase 1	NA	NA	NA	NA	2	2	2	2	2	2	2	2	2	2	2	2	2	2	2	2	2	2
		18.215	18.3354	18.2563	18.3438	18.4777	18.405	18.2757	18.4113	18.4929	18.4527	18.2504	18.3139	18.3288	18.2218	18.2443	18.4042	18.1478	18.1806	18.0749	18.1452	ATP2B1.2	ATP2B1;ATP2B2;ATP2B4	AT2B1_HUMAN;AT2B2_HUMAN;AT2B4_HUMAN	P20020;P23634;Q01814	P20020;Q01814;Q16720;P23634	Plasma membrane calcium-transporting ATPase 1	SASP	NA	up	NA	19	18	19	18	19	19	18	19	18	18	19	18	19	19	18	19	19	19
		17.2684	17.1353	17.1554	17.206	17.1845	17.2247	17.2959	17.3105	17.4728	17.4137	17.5938	17.4929	17.3985	17.499	17.4082	17.3783	17.3397	17.4164	17.3685	17.2629	ATP2B1.1	ATP2B1;ATP2B4	AT2B1_HUMAN;AT2B4_HUMAN	P20020;P23634	P20020;P23634	Plasma membrane calcium-transporting ATPase 1	SASP	NA	up	NA	15	16	16	15	16	16	13	16	17	14	15	14	15	15	16	15	15	16
		18.9097	18.7773	18.6953	18.7825	18.8277	18.8631	18.8922	18.88	19.0132	18.869	18.9442	18.9672	18.9319	18.9861	18.9546	18.9199	18.8636	18.8999	18.891	18.9198	ATP2B4	ATP2B4	AT2B4_HUMAN	P23634	P23634	Plasma membrane calcium-transporting ATPase 4	SASP	NA	up	NA	67	71	67	69	64	71	69	69	71	72	70	73	73	71	68	74	70	75
		15.0911	15.1507	15.1283	15.1014	15.0877	15.1435	15.2239	15.1462	15.2446	15.2427	15.1416	15.1174	15.1067	14.9942	15.0918	15.2002	15.1145	15.1163	14.994	15.0847	ATP2C1	ATP2C1	AT2C1_HUMAN	P98194	P98194	Calcium-transporting ATPase type 2C member 1	NA	NA	NA	NA	28	28	26	29	28	28	28	28	28	30	29	28	30	30	28	27	29	30
		15.5382	15.5029	15.4792	15.4693	15.5781	15.6757	15.6734	15.667	15.8029	15.6191	15.6365	15.6597	15.7229	15.6349	15.6849	15.8381	15.6902	15.7503	15.6941	15.7718	PHYKPL	PHYKPL	AT2L2_HUMAN	Q8IUZ5	Q8IUZ5	5-phosphohydroxy-L-lysine phospho-lyase	NA	NA	NA	NA	13	11	9	10	11	11	12	11	11	13	11	12	12	13	10	11	11	13
		16.417	16.5992	15.9786	16.3267	16.2168	16.1182	16.2929	16.1783	16.3057	16.3746	15.9814	16.2286	16.2093	15.973	15.8746	16.2196	15.9349	16.0734	16.0225	16.0465	ATP5F1EP2	ATP5F1EP2	AT5EL_HUMAN	Q5VTU8	Q5VTU8;P56381	ATP synthase subunit epsilon-like protein, mitochondrial	NA	NA	NA	NA	4	4	4	4	4	4	4	4	4	4	4	4	4	4	4	4	4	4
		17.7678	17.6856	17.5052	17.5764	17.5696	17.7942	17.7589	17.5764	17.9011	17.7147	17.8749	17.7497	17.7665	17.9327	17.8703	17.7062	17.9203	17.8562	18.0087	17.8815	ATP5PB	ATP5PB	AT5F1_HUMAN	P24539	P24539	ATP synthase F(0) complex subunit B1, mitochondrial	NA	NA	NA	NA	36	34	31	30	31	35	32	33	32	31	28	32	29	34	28	31	30	32
		11.2051	10.6705	10.2839	10.501	10.8189	10.9686	10.6337	10.6666	10.883	10.7996	11.0197	10.624	10.6722	10.6936	10.3285	10.8708	10.8314	10.1103	10.0856	10.7385	ATXN7L3	ATXN7L3	AT7L3_HUMAN	Q14CW9	Q14CW9	Ataxin-7-like protein 3	NA	NA	NA	NA	1	2	2	2	2	2	2	2	2	2	1	1	2	2	1	2	2	2
		11.3834	11.3267	11.8023	11.5953	11.2624	10.812	11.1343	11.6684	11.2786	11.3708	10.8307	11.4244	11.8893	11.4912	11.5923	11.3222	11.4233	11.4307	10.8055	11.498	ATP8B1	ATP8B1	AT8B1_HUMAN	O43520	O43520	Phospholipid-transporting ATPase IC	NA	NA	NA	NA	2	2	1	1	2	3	2	2	2	2	1	2	2	3	1	2	2	2
		12.243	12.243	11.8795	12.3738	12.3832	12.4185	11.6573	12.2818	12.3844	12.429	12.3132	12.4493	12.1585	12.5566	12.2285	12.4623	12.2989	12.4203	12.3916	12.3026	ATP8B1.1	ATP8B1;ATP8B2	AT8B1_HUMAN;AT8B2_HUMAN	O43520;P98198	Q9NTI2;O43520;P98198;O60423;Q8TF62	Phospholipid-transporting ATPase IC	NA	NA	NA	NA	1	1	1	1	1	1	1	1	1	1	1	1	1	1	1	1	1	1
		16.2299	16.2871	16.2483	16.2984	16.477	16.3609	16.4083	16.4397	16.4383	16.3667	16.5045	16.5181	16.5188	16.5187	16.4377	16.5695	16.3208	16.392	16.2504	16.4978	ATP8B2	ATP8B2	AT8B2_HUMAN	P98198	P98198	Phospholipid-transporting ATPase ID	NA	NA	NA	NA	11	12	10	13	12	12	10	12	12	12	11	9	12	12	13	12	11	12
		15.1193	14.9439	14.9904	15.1866	15.2567	15.2215	15.1154	15.149	15.1681	15.2858	15.4341	15.3928	15.4746	15.5312	15.3694	15.4564	15.438	15.2644	15.2562	15.372	ATAD1	ATAD1	ATAD1_HUMAN	Q8NBU5	Q8NBU5	Outer mitochondrial transmembrane helix translocase	NA	NA	NA	NA	16	17	12	17	15	16	16	17	17	17	17	16	17	15	16	17	17	17
		13.5283	13.5716	13.4781	13.3329	13.5301	13.4933	13.4307	13.5534	13.5302	13.5071	13.4263	13.5675	13.3938	13.3261	13.5591	13.5516	13.4023	13.1577	13.3767	13.302	ATAT1	ATAT1	ATAT_HUMAN	Q5SQI0	Q5SQI0	Alpha-tubulin N-acetyltransferase 1	NA	NA	NA	NA	3	4	4	4	4	3	4	4	4	4	4	4	4	4	3	3	4	4
		16.2906	16.2552	16.2284	16.2931	16.2469	16.3593	16.2972	16.2562	16.4692	16.3361	16.1608	16.1546	16.1667	16.1411	16.0358	16.1224	16.2211	16.1758	16.1122	16.1446	ATAD3A.1	ATAD3A	ATD3A_HUMAN	Q9NVI7	Q9NVI7	ATPase family AAA domain-containing protein 3A	NA	NA	NA	NA	21	20	21	21	21	22	22	21	22	22	20	18	21	20	19	20	18	19
		16.9174	17.0087	16.8813	17.038	17.0255	17.0736	17.1347	17.0435	17.0709	17.071	16.7385	16.6679	16.7313	16.5955	16.6712	16.8617	16.5026	16.7731	16.7744	16.8128	ATAD3A	ATAD3A;ATAD3B	ATD3A_HUMAN;ATD3B_HUMAN	Q5T9A4;Q9NVI7	Q9NVI7;Q5T9A4	ATPase family AAA domain-containing protein 3B	SASP	NA	up	NA	20	21	20	21	19	22	21	22	22	21	20	20	21	21	21	19	20	19
		14.7596	14.7026	14.377	14.331	14.5961	14.9493	14.8306	14.679	14.6677	14.5145	14.1405	14.0776	14.3294	14.2677	14.2105	14.3152	14.3815	14.2858	14.324	14.4529	ATAD3B	ATAD3B	ATD3B_HUMAN	Q5T9A4	Q5T9A4	ATPase family AAA domain-containing protein 3B	SASP	NA	up	NA	13	13	14	13	13	12	12	12	13	12	12	10	12	11	10	10	11	11
		14.2069	14.1002	14.1367	13.9623	14.0701	14.2575	14.4548	14.3085	14.264	14.333	14.5253	14.4442	14.549	14.4526	14.3277	14.4845	14.2532	14.3953	14.3527	14.2329	ATE1	ATE1	ATE1_HUMAN	O95260	O95260	Arginyl-tRNA--protein transferase 1	NA	NA	NA	NA	13	16	15	14	13	13	15	15	14	14	13	13	13	13	14	15	14	15
		9.30093	9.72572	9.70974	9.07687	11.4918	9.29791	10.1268	9.9253	9.80706	9.67971	9.05037	8.68424	10.1978	9.55598	9.62094	10.196	9.82357	9.35859	10.0566	10.1126	ATF1.1	ATF1	ATF1_HUMAN	P18846	P18846	Cyclic AMP-dependent transcription factor ATF-1	NA	NA	NA	NA	1	2	1	2	0	2	1	1	2	2	1	1	2	1	1	1	1	2
		14.561	15.2108	15.3992	15.3365	15.2439	14.8524	14.5185	15.1822	15.3554	15.1635	14.4371	14.6231	14.8926	14.2611	14.385	14.7386	14.6137	14.3053	13.9977	14.3524	ATF1	ATF1;CREB1	ATF1_HUMAN;CREB1_HUMAN	P16220;P18846	P18846;P16220	Cyclic AMP-responsive element-binding protein 1	NA	NA	NA	NA	2	1	2	2	1	2	2	1	1	2	1	1	1	1	1	1	2	2
		12.3929	12.4752	12.1996	12.1876	12.4211	12.5771	12.7003	12.1812	12.4364	12.1757	12.3943	12.404	12.4812	11.9623	12.2464	12.3239	11.8478	12.1549	12.2538	12.2633	ATF2	ATF2	ATF2_HUMAN	P15336	P15336	Cyclic AMP-dependent transcription factor ATF-2	NA	NA	NA	NA	3	5	4	4	5	5	4	5	5	5	4	4	4	4	4	4	3	5
		12.3521	12.2125	11.9031	12.2879	12.2243	12.5784	12.4982	12.2323	12.161	12.3867	12.3887	12.2818	12.3833	12.1234	12.2355	12.124	11.9959	12.2703	12.1244	12.1993	ATF2.1	ATF2;ATF7	ATF2_HUMAN;ATF7_HUMAN	P15336;P17544	P15336;P17544	Cyclic AMP-dependent transcription factor ATF-2	NA	NA	NA	NA	3	3	3	3	3	3	3	3	3	3	3	3	3	3	2	3	3	3
		10.7801	10.9462	11.4137	10.5727	11.3066	11.2461	11.004	10.9374	10.9083	10.7132	10.9348	11.1586	10.9168	10.9145	10.9786	11.2432	10.8783	10.8921	10.7151	11.0036	ATF6	ATF6	ATF6A_HUMAN	P18850	P18850	Cyclic AMP-dependent transcription factor ATF-6 alpha	NA	NA	NA	NA	2	3	2	3	2	2	3	3	3	3	3	1	3	3	3	3	2	3
		11.9719	11.8787	12.0127	12.1491	12.0653	12.2802	11.8164	12.033	11.8696	12.041	12.1825	11.8884	12.0504	11.7195	12.0642	11.7857	11.6716	11.7639	11.7814	11.7535	ATF6B	ATF6B	ATF6B_HUMAN	Q99941	Q99941	Cyclic AMP-dependent transcription factor ATF-6 beta	NA	NA	NA	NA	4	5	4	5	5	4	4	3	5	4	4	3	4	4	4	4	4	4
		12.1493	12.1905	11.8247	12.0347	12.0836	12.3008	12.1228	12.3066	12.241	11.9329	12.1425	12.0044	11.9941	11.8755	11.8502	11.9078	11.9486	11.7472	11.6753	12.2374	ATF7	ATF7	ATF7_HUMAN	P17544	P17544	Cyclic AMP-dependent transcription factor ATF-7	NA	NA	NA	NA	7	8	8	6	7	9	9	8	8	8	6	8	7	7	7	7	7	5
		11.8071	12.1885	12.2331	12.3532	12.0409	12.142	12.0894	12.2887	11.992	12.3875	12.2733	12.0675	11.9872	12.1363	11.806	11.8476	12.1566	11.8708	11.8418	11.9901	ATG12	ATG12	ATG12_HUMAN	O94817	O94817	Ubiquitin-like protein ATG12	NA	NA	NA	NA	2	2	2	2	2	2	2	2	2	2	2	2	2	2	2	2	1	2
		13.5313	13.4268	13.5579	13.3322	13.6656	13.3972	13.7826	13.616	13.5593	13.6299	13.8678	13.8157	13.5304	13.6602	13.6809	13.7202	13.7147	13.8133	13.7051	13.7517	ATG13	ATG13	ATG13_HUMAN	O75143	O75143	Autophagy-related protein 13	NA	NA	NA	NA	6	9	8	8	9	9	8	8	9	9	7	8	9	9	7	9	6	6
		11.5582	11.5616	11.4882	11.3756	11.1758	11.3712	11.1034	11.4214	11.3788	11.4727	11.0216	11.4503	10.7741	11.5187	11.624	11.322	11.1567	10.3669	9.99434	9.98571	ATG2A	ATG2A	ATG2A_HUMAN	Q2TAZ0	Q2TAZ0	Autophagy-related protein 2 homolog A	NA	NA	NA	NA	2	4	4	4	5	4	2	4	5	4	3	3	2	2	1	4	2	3
		14.2211	14.0608	14.0876	14.1277	14.1133	14.1059	14.1393	14.2856	14.1559	14.1263	14.1153	14.1011	14.1243	14.0578	14.0849	14.1165	14.0652	13.986	14.0987	14.0212	ATG2B	ATG2B	ATG2B_HUMAN	Q96BY7	Q96BY7	Autophagy-related protein 2 homolog B	NA	NA	NA	NA	28	28	27	26	29	31	28	28	30	28	21	21	24	22	20	25	18	24
		15.2373	15.2502	14.9564	15.2591	15.1105	15.1554	15.3174	15.278	15.4293	15.4055	15.1985	15.3042	15.3734	15.2884	15.1909	15.301	15.1459	15.3052	15.4279	15.2709	ATG3	ATG3	ATG3_HUMAN	Q9NT62	Q9NT62	Ubiquitin-like-conjugating enzyme ATG3	NA	NA	NA	NA	12	14	15	12	14	13	14	13	15	14	14	13	13	12	13	13	13	13
		13.9194	13.807	13.6915	13.6621	13.815	13.751	13.8469	13.7588	13.66	13.9208	14.0184	14.0639	13.9116	14.0605	14.0219	14.0263	14.0009	14.0075	13.8603	13.9221	ATG4B	ATG4B	ATG4B_HUMAN	Q9Y4P1	Q9Y4P1	Cysteine protease ATG4B	NA	NA	NA	NA	12	14	12	14	12	13	13	14	14	14	13	13	13	11	12	12	13	12
		10.8343	11.5818	11.7736	11.7948	11.4291	11.3058	10.7799	11.0043	11.3897	11.0854	10.2382	10.549	10.6844	10.6261	9.26525	11.0742	10.5105	9.93758	10.4606	10.7069	ATG4C	ATG4C	ATG4C_HUMAN	Q96DT6	Q96DT6	Cysteine protease ATG4C	NA	NA	NA	NA	2	2	2	2	2	2	2	2	2	2	1	2	2	1	2	2	2	2
		14.2755	14.0654	14.1831	14.1618	14.185	14.2668	14.3685	14.4678	14.3113	14.2938	14.3686	14.3606	14.3083	14.3082	14.3875	14.4387	14.343	14.3483	14.2697	14.3879	ATG5	ATG5	ATG5_HUMAN	Q9H1Y0	Q9H1Y0	Autophagy protein 5	NA	NA	NA	NA	13	14	12	13	16	13	15	11	16	14	14	13	15	15	14	14	15	15
		15.1516	15.2372	15.159	15.1395	15.2165	15.1762	15.1961	15.2159	15.2767	15.2471	15.0863	15.1776	15.0909	15.0963	15.1175	15.1387	15.0905	15.1134	15.1121	15.1952	ATG7	ATG7	ATG7_HUMAN	O95352	O95352	Ubiquitin-like modifier-activating enzyme ATG7	NA	NA	NA	NA	27	26	28	27	30	27	29	29	29	28	27	28	27	26	28	26	28	29
		13.7584	13.5398	13.6155	13.4251	13.7124	13.581	13.7499	13.7355	13.6327	13.6532	13.9534	13.879	13.7812	14.0234	13.9841	14.0541	13.9148	13.9191	13.819	13.972	ATG9A	ATG9A	ATG9A_HUMAN	Q7Z3C6	Q7Z3C6	Autophagy-related protein 9A	NA	NA	NA	NA	14	14	14	13	13	13	13	14	13	14	15	14	16	16	14	14	14	15
		12.5267	12.762	12.6358	12.4373	12.7089	12.4593	12.6382	12.6747	12.2088	12.614	12.649	12.7796	12.7433	12.6892	12.8252	12.8966	12.6299	12.5484	12.6874	12.6958	ATG101	ATG101	ATGA1_HUMAN	Q9BSB4	Q9BSB4	Autophagy-related protein 101	NA	NA	NA	NA	4	6	6	5	5	4	5	4	5	4	5	5	5	5	3	5	5	5
		14.9084	14.945	14.7221	14.876	14.7269	14.6797	14.4693	14.4614	14.2645	14.912	14.6956	14.6962	14.5347	14.3515	14.2225	14.202	14.2745	14.0668	13.9898	14.111	ATP5IF1	ATP5IF1	ATIF1_HUMAN	Q9UII2	Q9UII2	ATPase inhibitor, mitochondrial	NA	NA	NA	NA	4	5	4	5	4	5	4	5	5	4	4	3	4	4	5	4	5	5
		10.7654	9.82263	9.69666	9.51163	10.3172	10.0295	9.58112	9.69984	9.63392	9.81982	9.70794	9.8514	9.62492	10.0511	10.235	10.04	9.82943	9.21179	9.12453	9.42129	ADAMTSL1	ADAMTSL1	ATL1_HUMAN	Q8N6G6	Q8N6G6	ADAMTS-like protein 1	SAASP	NA	NA	up	1	1	1	2	1	1	2	0	1	1	1	0	1	0	2	0	1	1
		14.2289	14.0475	14.073	14.0694	14.1561	14.1325	14.2493	14.1769	14.2468	14.2224	14.3894	14.2844	14.3061	14.3206	14.3213	14.2857	14.1769	14.3294	14.2699	14.2991	ATL1.1	ATL1	ATLA1_HUMAN	Q8WXF7	Q8WXF7	Atlastin-1	NA	NA	NA	NA	23	21	22	23	22	21	23	22	22	22	23	22	23	21	20	22	22	22
		13.8912	13.6057	13.4989	13.6906	13.5664	13.849	13.8444	13.7284	13.8505	13.6363	13.9705	13.8443	13.8159	13.9215	13.7358	13.6761	13.7458	13.5153	13.8848	13.75	ATL1	ATL1;ATL2	ATLA1_HUMAN;ATLA2_HUMAN	Q8NHH9;Q8WXF7	Q8WXF7;Q8NHH9	Atlastin-2	NA	NA	NA	NA	2	2	2	2	2	2	2	2	2	2	2	2	2	2	2	2	2	2
		13.1132	12.7329	12.8997	12.9049	12.8495	12.9135	13.2012	13.0647	13.1866	13.0969	13.0603	13.0843	13.1257	12.996	13.1141	13.2061	13.0735	13.2094	13.106	13.2235	ATL2	ATL2	ATLA2_HUMAN	Q8NHH9	Q8NHH9	Atlastin-2	NA	NA	NA	NA	12	12	10	11	11	10	10	12	13	13	11	14	11	11	12	12	13	13
		17.434	17.5031	17.3874	17.3636	17.4979	17.5094	17.4698	17.5146	17.5727	17.6241	17.5242	17.5866	17.5412	17.4685	17.5296	17.5969	17.5923	17.5165	17.5445	17.5731	ATL3	ATL3	ATLA3_HUMAN	Q6DD88	Q6DD88	Atlastin-3	SASP	NA	up	NA	48	53	56	53	54	56	55	51	53	54	52	51	55	56	52	51	51	52
		14.0049	13.872	13.7916	13.8012	13.8681	13.9762	13.9967	13.9543	13.9694	14.0577	14.1511	14.2006	14.1856	14.1272	14.1131	14.1467	14.2549	14.1735	14.1399	14.1421	ATM	ATM	ATM_HUMAN	Q13315	Q13315	Serine-protein kinase ATM	NA	NA	NA	NA	50	63	63	63	63	64	66	60	61	71	64	58	62	65	61	67	58	66
		12.889	12.8036	12.9076	12.8756	12.9214	13.1551	12.8006	12.8475	12.918	12.7001	12.7541	12.7515	12.8304	12.5669	12.6082	12.6883	12.365	12.6987	12.3966	12.5106	ATN1	ATN1	ATN1_HUMAN	P54259	P54259	Atrophin-1	NA	NA	NA	NA	11	10	10	9	9	10	10	10	10	10	9	7	7	10	6	7	7	8
		16.4873	15.9688	15.6005	15.4368	15.8292	15.9084	16.1472	15.8276	16.087	16.2424	16.701	16.6526	16.6534	16.5711	16.6387	16.2954	16.4887	16.7302	16.5646	16.5475	ATOX1	ATOX1	ATOX1_HUMAN	O00244	O00244	Copper transport protein ATOX1	SASP	NA	up	NA	9	11	10	11	11	10	12	12	11	11	10	12	12	10	10	11	10	10
		15.6474	15.3463	15.0602	15.1872	15.2182	15.6243	15.478	15.2554	15.3997	15.2105	15.51	15.3883	15.466	15.3668	15.4071	15.1855	15.2182	15.4544	15.3448	15.3804	ATP5PD	ATP5PD	ATP5H_HUMAN	O75947	O75947	ATP synthase subunit d, mitochondrial	NA	NA	NA	NA	20	21	21	22	22	22	21	22	20	22	22	22	22	22	22	20	22	22
		15.6248	15.6017	15.5271	15.5568	15.5916	15.7082	15.5311	15.6427	15.5306	15.3472	15.2255	15.3629	15.4284	15.4239	15.3187	15.3848	15.0435	15.179	15.1606	15.2546	ATP5ME	ATP5ME	ATP5I_HUMAN	P56385	P56385	ATP synthase subunit e, mitochondrial	NA	NA	NA	NA	6	6	6	6	6	6	6	6	6	6	6	6	6	6	6	6	5	6
		11.3365	11.7151	11.3936	11.3566	11.4677	11.5882	11.4289	11.6616	11.2308	11.2191	11.9053	11.7848	11.7627	11.9208	11.5029	11.3751	11.1821	11.6503	11.353	11.7443	ATP5PF	ATP5PF	ATP5J_HUMAN	P18859	P18859	ATP synthase-coupling factor 6, mitochondrial	NA	NA	NA	NA	3	4	4	3	4	4	4	4	4	4	4	4	4	4	3	3	4	4
		17.3413	17.3565	17.341	17.2947	17.3681	17.406	17.4479	17.4878	17.5059	17.3784	17.2661	17.3267	17.2627	17.333	17.2657	17.3854	17.3558	17.4976	17.199	17.3987	ATP5MG	ATP5MG	ATP5L_HUMAN	O75964	O75964	ATP synthase subunit g, mitochondrial	NA	NA	NA	NA	8	8	8	8	8	8	8	8	8	8	7	7	7	7	6	7	6	6
		12.5312	12.8609	12.7342	12.8114	12.6846	12.7491	12.5494	12.5969	12.8815	12.7247	12.9654	12.732	12.7606	12.548	12.5737	12.7403	12.65	12.5281	12.785	12.8143	DMAC2L	DMAC2L	ATP5S_HUMAN	Q99766	Q99766	ATP synthase subunit s, mitochondrial	NA	NA	NA	NA	6	6	5	6	5	6	5	6	6	6	6	6	5	6	5	6	6	5
		17.1031	17.1942	17.1424	17.2066	17.3172	17.3221	17.3823	17.2572	17.0502	17.2076	17.2207	17.2208	17.2541	17.0807	16.9261	17.5773	17.1451	17.2553	17.2655	17.2741	MT_ATP6	MT-ATP6	ATP6_HUMAN	P00846	P00846	ATP synthase subunit a	NA	NA	NA	NA	2	2	2	2	2	2	2	2	2	2	2	2	2	2	2	2	2	2
		15.7149	15.9196	16.3138	16.0372	15.9494	16.1919	15.8031	15.9026	16.5741	16.5058	15.9711	16.1059	15.6775	15.7851	15.5337	15.1307	15.6828	15.4766	15.4685	15.6071	ATP5MPL	ATP5MPL	ATP68_HUMAN	P56378	P56378	ATP synthase subunit ATP5MPL, mitochondrial	NA	NA	NA	NA	7	6	6	7	6	7	7	6	6	7	7	7	6	7	6	5	6	6
		13.0659	13.1482	13.1045	13.113	13.0578	13.1659	13.0271	13.1385	13.1489	13.1341	13.035	12.9975	12.9206	13.0371	13.1071	13.0951	13.0173	12.9593	12.8681	12.9594	ATP7A	ATP7A	ATP7A_HUMAN	Q04656	Q04656	Copper-transporting ATPase 1	NA	NA	NA	NA	18	20	18	19	21	20	21	19	21	21	19	20	20	17	18	19	18	20
		10.3181	11.1862	13.165	10.6543	13.1561	12.6338	13.3394	13.4077	12.9294	13.0733	13.4342	14.0421	13.558	13.7785	13.3861	13.5527	13.5335	13.8556	13.64	13.5965	MT_ATP8	MT-ATP8	ATP8_HUMAN	P03928	P03928	ATP synthase protein 8	NA	NA	NA	NA	0	0	1	0	1	1	1	1	1	1	1	1	1	1	1	1	1	1
		13.4751	13.4192	13.4752	13.3626	13.5797	13.5593	13.536	13.6068	13.4239	13.5815	13.6173	13.5801	13.5763	13.5988	13.5339	13.725	13.7019	13.6894	13.6763	13.7484	ATP9A.1	ATP9A	ATP9A_HUMAN	O75110	O75110	Probable phospholipid-transporting ATPase IIA	NA	NA	NA	NA	14	14	14	13	14	14	13	14	14	13	13	14	14	14	13	13	13	12
		13.6243	13.7856	13.6175	13.6698	13.7582	13.6184	13.74	13.6184	13.4803	13.5386	13.5607	13.5961	13.5486	13.4555	13.39	13.6641	13.3757	13.4999	13.2917	13.5445	ATP9A	ATP9A;ATP9B	ATP9A_HUMAN;ATP9B_HUMAN	O43861;O75110	O75110;O43861	Probable phospholipid-transporting ATPase IIB	NA	NA	NA	NA	4	4	4	3	4	4	4	4	4	4	4	4	4	4	4	4	4	4
		12.088	11.8283	11.8403	11.9385	12.0583	12.0806	12.0946	12.1375	12.0661	12.2642	12.3647	12.2795	12.241	12.345	12.4292	12.2443	12.3695	12.2894	12.1325	12.468	ATP9B	ATP9B	ATP9B_HUMAN	O43861	O43861	Probable phospholipid-transporting ATPase IIB	NA	NA	NA	NA	9	12	10	10	12	12	13	14	12	11	12	11	9	10	12	11	9	14
		19.2264	19.2122	19.0492	19.1679	19.119	19.2035	19.15	19.1476	19.2233	19.2568	19.1995	19.2822	19.2022	19.25	19.136	19.1815	19.3243	19.1967	19.1576	19.2078	ATP5F1A	ATP5F1A	ATPA_HUMAN	P25705	P25705	ATP synthase subunit alpha, mitochondrial	NA	NA	NA	NA	65	66	65	65	62	63	63	65	62	65	66	61	63	65	60	63	62	62
		19.749	19.7386	19.6411	19.5233	19.6168	19.7063	19.6738	19.7716	19.7691	19.7812	19.7232	19.8602	19.8112	19.8651	19.7276	19.733	19.8906	19.7725	19.7614	19.7884	ATP5F1B	ATP5F1B	ATPB_HUMAN	P06576	P06576	ATP synthase subunit beta, mitochondrial	NA	NA	NA	NA	63	62	62	64	64	63	61	62	63	63	64	64	66	66	62	61	63	64
		18.0283	18.0309	17.6275	18.0522	18.0127	18.2321	18.139	18.1224	18.1063	17.934	18.3344	18.1956	18.1173	18.103	18.0833	17.9353	17.9198	17.9089	17.9493	18.0218	ATP5F1D	ATP5F1D	ATPD_HUMAN	P30049	P30049	ATP synthase subunit delta, mitochondrial	NA	NA	NA	NA	5	5	5	5	5	5	5	5	5	5	5	5	5	5	5	5	5	5
		14.1382	13.9143	13.8346	13.7805	13.9965	13.9548	14.1263	13.9077	14.1402	13.9395	14.054	14.2235	14.1076	14.065	13.9566	13.8427	14.1544	14.0597	13.957	13.8806	ATPAF1	ATPAF1	ATPF1_HUMAN	Q5TC12	Q5TC12	ATP synthase mitochondrial F1 complex assembly factor 1	NA	NA	NA	NA	7	9	9	9	7	9	8	9	9	9	9	9	9	9	7	8	9	7
		12.2707	12.4545	12.347	12.7314	12.4132	12.3913	12.2067	12.3806	12.4304	12.2397	12.3675	12.1536	12.1024	12.0872	11.9825	12.3665	11.9407	12.0076	12.0597	12.1887	ATPAF2	ATPAF2	ATPF2_HUMAN	Q8N5M1	Q8N5M1	ATP synthase mitochondrial F1 complex assembly factor 2	NA	NA	NA	NA	8	10	10	9	8	9	9	9	9	9	8	9	7	8	7	7	6	8
		18.4734	18.7255	18.8053	18.7319	18.5823	18.6384	18.5332	18.6644	18.5987	18.6474	18.4889	18.6287	18.5783	18.5149	18.4501	18.6171	18.5459	18.4391	18.5005	18.5866	ATP5F1C	ATP5F1C	ATPG_HUMAN	P36542	P36542	ATP synthase subunit gamma, mitochondrial	NA	NA	NA	NA	19	19	18	18	21	19	18	20	20	19	18	16	19	19	19	17	17	18
		15.0325	15.2394	15.0683	14.804	15.1274	15.0727	15.2652	15.1242	15.389	15.2164	15.4593	15.3438	15.2328	15.0766	15.17	15.1803	15.0848	15.05	15.0075	14.9972	ATP5MF	ATP5MF	ATPK_HUMAN	P56134	P56134	ATP synthase subunit f, mitochondrial	NA	NA	NA	NA	5	5	5	4	5	4	4	5	5	5	5	4	5	5	5	5	5	5
		17.2694	17.3536	16.7475	16.7438	17.0431	17.2483	17.2666	17.3161	17.3244	17.2002	17.0831	17.2367	17.1338	17.2352	16.9624	17.1554	17.128	17.1281	17.1659	17.1616	ATP5MD	ATP5MD	ATPMD_HUMAN	Q96IX5	Q96IX5	ATP synthase membrane subunit DAPIT, mitochondrial	NA	NA	NA	NA	5	5	5	5	5	5	5	5	5	5	5	5	5	5	5	5	5	5
		18.4111	18.5064	18.5452	18.5338	18.5738	18.5557	18.4776	18.4816	18.7755	18.6633	18.4763	18.5338	18.4281	18.3962	18.23	18.4397	18.4065	18.4511	18.3861	18.463	ATP5PO	ATP5PO	ATPO_HUMAN	P48047	P48047	ATP synthase subunit O, mitochondrial	NA	NA	NA	NA	20	21	21	21	18	21	21	21	21	21	19	21	20	19	18	19	18	19
		11.3046	11.1635	10.8981	10.488	10.9383	11.2952	11.0166	11.1283	11.0803	11.23	11.3611	11.5232	11.2494	11.5062	11.6503	11.3039	11.647	11.3881	11.2584	11.6461	ATR	ATR	ATR_HUMAN	Q13535	Q13535	Serine/threonine-protein kinase ATR	NA	NA	NA	NA	3	3	4	2	2	3	5	2	3	4	4	4	4	3	4	4	3	3
		15.0825	15.5617	15.4928	15.4819	15.6574	15.5168	15.2664	15.3594	15.5696	15.5133	15.4186	15.3435	15.2781	15.2369	15.3098	15.4218	15.1654	15.3979	15.3815	15.4691	AGTRAP	AGTRAP	ATRAP_HUMAN	Q6RW13	Q6RW13	Type-1 angiotensin II receptor-associated protein	NA	NA	NA	NA	6	6	6	6	6	6	6	6	6	6	6	6	6	6	6	6	6	6
		13.3011	13.4827	13.2957	13.4844	13.366	13.2994	13.3381	13.5163	13.2833	13.5123	13.4099	13.3804	13.2637	13.2889	13.3088	13.3314	13.3489	12.9938	13.0265	13.2551	ATRN	ATRN	ATRN_HUMAN	O75882	O75882	Attractin	SASP	NA	altered	NA	12	13	13	13	12	12	13	14	13	14	12	12	12	12	10	11	8	11
		13.9933	13.7696	13.7399	13.7412	13.8674	13.9111	14.0695	13.8888	13.8412	13.9632	14.0213	14.0307	14.0131	14.0458	13.942	13.9657	13.9228	13.9685	14.0357	14.0588	ATRX	ATRX	ATRX_HUMAN	P46100	P46100	Transcriptional regulator ATRX	NA	NA	NA	NA	51	51	56	50	55	54	52	57	58	55	51	49	49	53	48	52	53	54
		12.3557	12.0599	12.1037	11.9603	12.248	12.1935	12.3357	12.3293	12.1481	12.6566	12.2052	12.3595	12.4453	12.3471	12.2174	12.4249	12.2208	12.26	12.2266	12.2363	ADAMTS1	ADAMTS1	ATS1_HUMAN	Q9UHI8	Q9UHI8	A disintegrin and metalloproteinase with thrombospondin motifs 1	NA	NA	NA	NA	9	11	13	11	11	12	13	14	14	13	8	11	13	9	12	11	9	11
		9.59039	9.6835	9.89077	10.6615	10.2011	10.0412	9.91882	9.72365	9.53577	10.5116	10.0436	9.63418	9.34913	10.2393	9.42424	10.3246	9.96901	10.1496	10.3607	10.0851	ADAMTS15	ADAMTS15	ATS15_HUMAN	Q8TE58	Q8TE58	A disintegrin and metalloproteinase with thrombospondin motifs 15	NA	NA	NA	NA	2	2	1	0	0	2	1	2	2	2	1	2	1	2	2	1	2	2
		11.8693	11.6451	11.6399	11.7953	11.7602	11.8027	11.9421	11.6723	11.6123	11.7389	11.8705	11.8672	11.9366	11.9749	11.9211	11.9846	11.8509	11.9322	11.8043	11.7738	ADAMTS2	ADAMTS2	ATS2_HUMAN	O95450	O95450	A disintegrin and metalloproteinase with thrombospondin motifs 2	NA	NA	NA	NA	6	7	7	7	6	6	6	6	6	6	5	5	4	6	7	6	5	7
		13.214	13.1859	13.0919	13.1697	13.0635	13.1764	12.9889	13.022	13.0697	13.0563	13.0547	13.2082	13.2021	13.0661	13.0766	12.9279	12.9701	13.087	13.1011	13.1163	ATXN1	ATXN1	ATX1_HUMAN	P54253	P54253	Ataxin-1	NA	NA	NA	NA	10	11	9	11	12	9	9	11	13	9	10	11	10	10	9	10	11	12
		15.3308	15.3306	15.2244	15.2068	15.2425	15.1987	15.2523	15.1657	15.2785	15.2493	15.0909	14.9678	15.0336	15.0216	15.0917	14.9432	14.9313	14.9635	15.0351	15.1407	ATXN10	ATXN10	ATX10_HUMAN	Q9UBB4	Q9UBB4	Ataxin-10	NA	NA	NA	NA	24	25	22	24	24	24	24	23	24	24	22	22	24	23	25	22	23	24
		14.4187	14.4172	14.0683	14.2488	14.2084	14.196	14.2145	14.6115	14.1703	14.2988	13.9896	13.6893	13.7795	13.5766	13.5082	13.8623	13.8796	13.9907	13.5214	13.3583	ATXN1L	ATXN1L	ATX1L_HUMAN	P0C7T5	P0C7T5	Ataxin-1-like	NA	NA	NA	NA	3	3	2	3	4	4	3	2	3	3	2	1	2	2	1	2	3	2
		15.1261	15.0081	14.9398	14.9868	15.117	15.126	15.0766	15.046	15.1308	15.0867	15.0753	14.993	15.1184	15.0197	15.0969	14.9859	15.0022	14.9506	14.9706	14.9652	ATXN2	ATXN2	ATX2_HUMAN	Q99700	Q99700	Ataxin-2	NA	NA	NA	NA	42	42	41	42	40	43	42	41	41	42	38	40	37	40	36	42	36	40
		15.8628	15.6646	15.6016	15.6803	15.6023	15.9471	15.7933	15.6633	15.7931	15.7315	15.7554	15.6809	15.7442	15.6803	15.7183	15.6827	15.5333	15.5827	15.6181	15.6586	ATXN2L	ATXN2L	ATX2L_HUMAN	Q8WWM7	Q8WWM7	Ataxin-2-like protein	NA	NA	NA	NA	45	48	47	43	48	49	48	48	46	45	48	48	47	45	44	50	41	46
		14.0849	13.9848	13.906	13.9349	13.9587	14.1266	14.1442	14.1413	14.014	13.9961	14.2731	14.1847	14.291	14.1585	14.1774	14.2669	14.2091	14.338	14.3291	14.2936	ATXN3	ATXN3	ATX3_HUMAN	P54252	P54252	Ataxin-3	NA	NA	NA	NA	13	15	12	12	14	14	15	13	14	13	14	15	15	11	14	15	14	14
		13.9397	14.0155	14.207	14.2199	14.2628	14.0714	14.0841	14.2002	14.261	14.1704	13.9712	14.1303	13.9927	14.0395	14.062	14.1584	14.0738	14.0426	13.9537	14.1237	AUH	AUH	AUHM_HUMAN	Q13825	Q13825	Methylglutaconyl-CoA hydratase, mitochondrial	SASP	NA	up	NA	5	6	8	6	7	8	6	7	7	7	5	5	5	5	5	6	6	5
		14.8977	14.7666	14.6674	14.9604	14.7765	14.941	14.9053	14.9887	14.8233	14.9522	14.816	14.67	14.9463	14.7531	14.7747	14.9316	14.6381	14.6519	14.6645	14.7852	AUP1	AUP1	AUP1_HUMAN	Q9Y679	Q9Y679	Lipid droplet-regulating VLDL assembly factor AUP1	NA	NA	NA	NA	12	14	12	14	11	12	13	13	13	13	13	12	12	13	11	14	13	12
		13.7911	13.6128	13.5373	13.5346	13.6303	13.8258	13.7593	13.5178	13.6568	13.521	13.841	13.7487	13.7437	13.655	13.6109	13.5745	13.6602	13.707	13.5998	13.6953	AVEN	AVEN	AVEN_HUMAN	Q9NQS1	Q9NQS1	Cell death regulator Aven	NA	NA	NA	NA	11	11	12	12	10	11	11	11	12	11	10	9	12	10	11	10	11	13
		13.0769	13.2889	13.1287	13.2334	13.1674	13.2561	13.3408	13.2873	13.3283	13.3509	13.1026	13.1745	13.143	13.0842	13.25	13.1095	13.0899	13.0402	13.2425	13.2081	AVL9	AVL9	AVL9_HUMAN	Q8NBF6	Q8NBF6	Late secretory pathway protein AVL9 homolog	NA	NA	NA	NA	11	11	9	10	9	10	9	10	10	9	10	11	11	10	9	11	10	11
		11.7608	11.5521	11.6995	11.5166	11.5295	11.8071	11.9113	11.6313	11.6529	11.5442	11.9271	12.0329	12.0642	12.1172	11.8964	11.7737	11.7884	11.647	11.7781	11.91	AXIN1	AXIN1	AXIN1_HUMAN	O15169	O15169	Axin-1	NA	NA	NA	NA	4	4	3	4	4	4	4	4	4	4	3	3	3	4	3	3	3	4
		12.2572	12.2189	12.1251	12.2837	12.2834	12.468	12.4455	12.3354	12.2283	12.4106	12.045	12.127	12.2171	11.9002	12.0104	12.2383	11.9434	12.1246	11.9832	12.0764	AZI2	AZI2	AZI2_HUMAN	Q9H6S1	Q9H6S1	5-azacytidine-induced protein 2	NA	NA	NA	NA	10	11	11	10	10	10	11	10	11	11	11	10	11	10	11	11	10	10
		12.0561	12.2069	12.8588	12.7929	12.5313	11.8579	12.1565	12.4752	12.4053	12.506	12.4978	12.7053	12.4048	12.2724	12.2208	12.5954	12.3252	12.2927	12.1473	12.1547	BCL2L1	BCL2L1	B2CL1_HUMAN	Q07817	Q07817	Bcl-2-like protein 1	NA	NA	NA	NA	2	3	3	3	3	2	2	2	3	3	2	2	3	3	2	2	2	2
		11.9603	11.2191	11.4782	11.1715	11.6996	11.8812	11.9716	11.7452	11.6178	11.7496	12.5153	12.4775	12.4087	12.3729	12.7064	12.4398	12.5938	12.3915	12.4047	12.0522	BCL2L2	BCL2L2	B2CL2_HUMAN	Q92843	Q92843	Bcl-2-like protein 2	NA	NA	NA	NA	4	4	4	4	4	4	4	4	4	4	4	4	4	4	3	4	3	3
		14.9197	14.5383	14.4445	14.477	14.6364	14.9198	14.8967	14.5719	14.8213	14.6044	14.7383	14.522	14.7578	14.5822	14.6901	14.6792	14.6652	14.601	14.5828	14.7061	BCL2L13	BCL2L13	B2L13_HUMAN	Q9BXK5	Q9BXK5	Bcl-2-like protein 13	SASP	NA	up	NA	22	24	22	20	24	25	25	21	21	22	25	24	24	24	24	23	22	25
		18.0347	17.8212	17.945	17.8833	17.7925	17.9236	17.8983	17.9533	17.7838	17.8438	17.8153	17.8807	17.772	17.6141	17.6278	17.6158	17.7851	17.6685	17.547	17.5898	B2M	B2M	B2MG_HUMAN	P61769	P61769	Beta-2-microglobulin	SASP	NA	altered	NA	8	8	6	8	7	8	8	6	8	8	8	8	8	7	8	7	7	7
		11.5225	11.6618	11.2146	11.4962	11.4359	11.4573	11.8685	11.5225	11.4536	11.695	11.7681	11.8529	11.542	11.6716	11.7578	11.4746	11.6903	11.4817	11.5167	11.5637	SLC4A2	SLC4A2	B3A2_HUMAN	P04920	P04920	Anion exchange protein 2	NA	NA	NA	NA	5	7	6	6	5	6	6	7	6	7	6	5	6	7	6	6	6	7
		12.6032	12.5929	12.8275	12.5742	12.5959	12.4081	12.7366	12.5509	12.6345	12.8604	12.9575	12.7808	12.757	12.8683	12.672	12.7856	13.029	12.5927	12.9267	12.9513	B3GAT3	B3GAT3	B3GA3_HUMAN	O94766	Q9NPZ5;O94766	Galactosylgalactosylxylosylprotein 3-beta-glucuronosyltransferase 3	NA	NA	NA	NA	5	7	7	7	6	6	6	6	6	7	6	5	6	6	6	6	5	7
		10.9527	11.6638	11.3511	11.5812	11.1612	10.9943	11.2568	11.6867	11.7022	11.7092	11.3149	11.2254	11.6402	10.7166	11.5673	11.219	10.6797	11.5383	11.5428	11.6867	B3GALNT1	B3GALNT1	B3GL1_HUMAN	O75752	O75752	UDP-GalNAc:beta-1,3-N-acetylgalactosaminyltransferase 1	NA	NA	NA	NA	1	1	1	1	1	1	1	1	1	1	1	1	1	1	1	1	1	1
		11.7855	11.6779	11.2169	11.5397	11.4622	11.6311	11.6717	11.614	11.923	11.9135	11.9127	12.1246	11.6431	12.0486	11.9803	11.6971	12.0334	12.0667	11.612	11.7784	B3GALNT2	B3GALNT2	B3GL2_HUMAN	Q8NCR0	Q8NCR0	UDP-GalNAc:beta-1,3-N-acetylgalactosaminyltransferase 2	NA	NA	NA	NA	4	3	3	3	4	4	3	4	4	4	3	3	3	2	4	3	2	3
		14.348	14.5399	14.5136	14.5302	14.5268	14.4255	14.5086	14.5652	14.4815	14.5331	14.4881	14.5775	14.5351	14.541	14.5423	14.5836	14.4901	14.548	14.6598	14.6468	B3GLCT	B3GLCT	B3GLT_HUMAN	Q6Y288	Q6Y288	Beta-1,3-glucosyltransferase	NA	NA	NA	NA	13	15	15	14	14	14	15	15	15	14	13	12	15	14	12	14	14	16
		13.4848	13.3645	13.475	13.6618	13.2623	13.5834	13.685	13.5834	13.4502	13.7287	13.6952	13.6466	13.6385	13.5939	13.7151	13.535	13.7733	13.6128	13.5311	13.5197	B3GNT9	B3GNT9	B3GN9_HUMAN	Q6UX72	Q6UX72	UDP-GlcNAc:betaGal beta-1,3-N-acetylglucosaminyltransferase 9	NA	NA	NA	NA	4	5	5	5	5	5	5	4	5	5	5	5	5	5	5	5	5	5
		12.0336	12.5576	12.2905	12.2131	12.3171	12.0837	11.9601	12.1755	12.0515	12.2002	11.7271	11.8371	11.6005	12.222	12.7008	11.992	12.0796	11.9796	12.0325	11.8823	B3GALT6	B3GALT6	B3GT6_HUMAN	Q96L58	Q96L58	Beta-1,3-galactosyltransferase 6	NA	NA	NA	NA	5	5	5	5	5	5	5	5	5	5	4	4	4	5	2	4	2	3
		13.7119	13.6515	13.9959	14.032	14.0018	14.0799	13.9675	14.0538	14.034	14.0198	14.0633	14.1163	14.0307	14.0693	13.942	14.0784	13.8753	13.9498	13.9552	14.0956	B4GAT1	B4GAT1	B4GA1_HUMAN	O43505	O43505	Beta-1,4-glucuronyltransferase 1	SASP	NA	down	NA	4	6	6	5	5	5	6	5	6	6	6	6	6	6	5	6	6	6
		14.595	14.5505	14.534	14.5756	14.4159	14.5878	14.3975	14.3735	14.2919	14.2494	14.2497	14.3349	14.132	14.2292	14.3861	14.2766	14.1156	14.1995	14.3224	14.3218	B4GALT1	B4GALT1	B4GT1_HUMAN	P15291	P15291	Beta-1,4-galactosyltransferase 1	SASP	NA	altered	NA	9	9	7	8	8	8	9	8	8	8	6	8	7	9	8	8	6	8
		12.6256	12.5926	12.3197	12.4717	12.539	12.1858	12.5814	12.4559	12.2898	12.4935	12.6434	12.6406	12.4912	12.621	12.6939	12.4756	12.5426	12.5631	12.4331	12.2751	B4GALT4	B4GALT4	B4GT4_HUMAN	O60513	O60513	Beta-1,4-galactosyltransferase 4	NA	NA	NA	NA	8	8	8	9	9	9	9	8	9	9	9	9	8	9	9	9	8	9
		13.6176	13.7301	13.7037	13.819	13.7544	13.6975	13.6646	13.7765	13.8136	13.8087	13.4821	13.709	13.8029	13.7603	13.6389	13.7739	13.6194	13.5779	13.7388	13.831	B4GALT7	B4GALT7	B4GT7_HUMAN	Q9UBV7	Q9UBV7	Beta-1,4-galactosyltransferase 7	NA	NA	NA	NA	4	5	5	5	5	5	5	5	5	5	5	4	4	5	4	4	4	4
		13.2495	12.9895	12.5399	13.0157	12.9288	13.0211	12.922	13.0897	12.9713	12.9615	12.9476	13.215	13.1397	13.0105	13.2312	13.1977	13.198	12.9277	13.124	13.106	B9D1	B9D1	B9D1_HUMAN	Q9UPM9	Q9UPM9	B9 domain-containing protein 1	NA	NA	NA	NA	2	3	2	3	3	3	3	2	3	2	2	3	2	2	2	2	3	3
		12.5624	12.1278	11.9043	11.4979	11.9682	12.4298	12.3382	12.3687	12.1864	11.9971	12.6459	12.8201	12.3726	12.5468	12.8283	12.683	12.5814	12.573	13.0692	12.5825	B9D2	B9D2	B9D2_HUMAN	Q9BPU9	Q9BPU9	B9 domain-containing protein 2	NA	NA	NA	NA	4	3	4	4	3	4	4	4	3	4	3	4	3	3	4	3	4	3
		14.4153	14.5582	14.5402	14.5481	14.492	14.5356	14.4808	14.4263	14.4965	14.4958	14.3487	14.2143	14.3029	14.0802	14.085	14.4132	14.0231	14.1527	14.0118	14.1242	BABAM1	BABAM1	BABA1_HUMAN	Q9NWV8	Q9NWV8	BRISC and BRCA1-A complex member 1	NA	NA	NA	NA	10	11	13	13	13	13	13	12	13	13	13	13	12	12	12	10	11	13
		14.716	14.6935	14.4771	14.6994	14.523	14.708	14.6873	14.6479	14.5909	14.6109	14.6301	14.6044	14.6491	14.6245	14.5441	14.4924	14.5417	14.6515	14.5333	14.541	BABAM2	BABAM2	BABA2_HUMAN	Q9NXR7	Q9NXR7	BRISC and BRCA1-A complex member 2	NA	NA	NA	NA	13	12	12	11	13	12	12	13	13	13	13	11	12	13	12	13	11	12
		10.6191	10.8009	10.6541	10.799	10.6758	10.909	10.8447	11.1768	10.7017	11.108	11.5433	11.2312	11.2259	11.1875	11.564	10.557	11.392	10.3074	10.2882	11.0009	TNFAIP1	TNFAIP1	BACD2_HUMAN	Q13829	Q13829	BTB/POZ domain-containing adapter for CUL3-mediated RhoA degradation protein 2	NA	NA	NA	NA	3	2	3	2	2	3	3	2	2	1	1	2	2	2	2	2	2	1
		13.0288	13.0178	13.0482	13.1324	12.9717	12.7854	12.9216	12.8681	13.0708	13.0903	13.0651	13.2577	13.1872	13.5652	13.6136	13.3119	13.5096	13.4066	13.2333	13.5211	KCTD10	KCTD10;TNFAIP1	BACD2_HUMAN;BACD3_HUMAN	Q13829;Q9H3F6	Q8WZ19;Q13829;Q9H3F6	BTB/POZ domain-containing adapter for CUL3-mediated RhoA degradation protein 2	NA	NA	NA	NA	2	2	2	2	2	2	2	2	1	2	2	2	2	1	1	2	1	1
		13.0611	12.9677	12.6482	12.6075	12.9442	12.9598	12.959	12.901	12.837	13.1394	13.2954	13.2927	13.1176	13.2156	13.0638	13.1393	12.8938	12.8847	13.1913	13.0972	KCTD10.1	KCTD10	BACD3_HUMAN	Q9H3F6	Q9H3F6	BTB/POZ domain-containing adapter for CUL3-mediated RhoA degradation protein 3	NA	NA	NA	NA	10	10	9	10	10	10	10	8	10	10	9	10	9	10	10	10	10	9
		16.3539	16.4271	16.3957	16.369	16.3295	16.2662	16.3255	16.4336	16.4412	16.4582	16.115	16.2402	16.1967	16.1574	16.0755	16.1537	16.0714	16.0835	16.1249	16.0688	ACOT7	ACOT7	BACH_HUMAN	O00154	O00154	Cytosolic acyl coenzyme A thioester hydrolase	SASP	NA	altered	NA	27	27	24	27	26	27	26	27	28	28	26	26	27	26	25	26	26	27
		12.2735	12.0542	11.6511	11.8018	12.2319	12.0802	12.1555	11.7576	11.7852	12.0244	12.3718	12.4957	12.6245	12.3328	12.4784	12.2203	12.224	12.3866	12.1532	12.2772	BACH1	BACH1	BACH1_HUMAN	O14867	O14867	Transcription regulator protein BACH1	NA	NA	NA	NA	8	8	6	6	8	8	8	8	7	8	8	8	8	7	7	8	8	8
		14.5835	14.3058	14.2402	14.1638	14.3927	14.3536	14.4328	14.5279	14.1418	14.1642	14.5794	14.5789	14.5096	14.5885	14.4596	14.6229	14.4438	14.5758	14.396	14.5067	BAD	BAD	BAD_HUMAN	Q92934	Q92934	Bcl2-associated agonist of cell death	NA	NA	NA	NA	6	7	7	6	6	7	7	6	6	7	8	8	8	8	8	8	8	8
		14.0015	13.8404	13.628	13.6034	13.4755	13.5605	13.7357	13.9726	13.311	12.9814	13.3975	13.5348	13.7827	13.471	13.5394	13.1633	12.9767	13.5458	13.5563	13.4945	BANF1	BANF1	BAF_HUMAN	O75531	O75531	Barrier-to-autointegration factor	NA	NA	NA	NA	5	5	5	4	5	6	6	5	5	5	5	5	5	5	5	5	5	5
		12.6382	12.54	12.5828	12.5533	12.5644	12.7522	13.0014	12.7802	12.9113	12.7878	13.1356	13.115	13.044	12.9059	13.0609	12.99	13.116	12.9061	12.9098	12.9585	BAG1	BAG1	BAG1_HUMAN	Q99933	Q99933	BAG family molecular chaperone regulator 1	NA	NA	NA	NA	9	9	8	9	8	9	9	9	9	8	9	8	9	8	9	9	9	9
		18.4322	18.4564	18.5033	18.5036	18.5551	18.667	18.5981	18.4877	18.6394	18.5839	18.4706	18.5735	18.5709	18.5131	18.5588	18.46	18.4993	18.529	18.614	18.6215	BAG2	BAG2	BAG2_HUMAN	O95816	O95816	BAG family molecular chaperone regulator 2	NA	NA	NA	NA	30	29	29	29	30	28	29	28	29	30	28	27	29	28	27	28	27	29
		15.4193	15.1477	14.961	15.0457	15.167	15.4822	15.3939	15.0443	15.3044	15.0947	15.5148	15.2819	15.4728	15.3816	15.3956	15.2324	15.0842	15.2618	15.2644	15.2682	BAG3	BAG3	BAG3_HUMAN	O95817	O95817	BAG family molecular chaperone regulator 3	SASP	NA	up	NA	44	44	39	43	42	46	45	44	44	45	41	44	43	44	43	45	42	42
		12.9712	12.9017	12.7828	12.9865	12.9708	13.1189	12.9483	12.7878	13.0945	12.8034	12.9978	12.7616	12.8759	12.715	12.819	12.689	12.4518	12.5766	12.7515	12.769	BAG4	BAG4	BAG4_HUMAN	O95429	O95429	BAG family molecular chaperone regulator 4	NA	NA	NA	NA	8	8	9	9	8	8	8	9	8	9	7	8	8	8	6	7	6	8
		13.6469	13.5801	13.4184	13.5043	13.4612	13.6524	13.576	13.5642	13.6401	13.5792	13.8272	13.6792	13.6742	13.668	13.6045	13.6917	13.5665	13.6408	13.5929	13.6486	BAG5	BAG5	BAG5_HUMAN	Q9UL15	Q9UL15	BAG family molecular chaperone regulator 5	NA	NA	NA	NA	19	19	19	18	19	18	19	18	19	19	18	16	17	19	20	19	20	19
		17.7622	17.4699	17.2879	17.3678	17.4164	17.7765	17.5466	17.2698	17.5159	17.3942	17.4518	17.309	17.5491	17.4838	17.4846	17.3808	17.3501	17.3517	17.5142	17.5456	BAG6	BAG6	BAG6_HUMAN	P46379	P46379	Large proline-rich protein BAG6	NA	NA	NA	NA	29	26	27	27	27	30	30	29	31	28	29	26	29	29	27	29	28	30
		13.7894	13.8273	13.8859	13.9102	13.9703	13.8784	13.8051	13.8043	13.9085	13.8667	13.6159	13.5672	13.612	13.6174	13.4337	13.6726	13.545	13.3905	13.5545	13.6567	BAIAP2	BAIAP2	BAIP2_HUMAN	Q9UQB8	Q9UQB8	Brain-specific angiogenesis inhibitor 1-associated protein 2	NA	NA	NA	NA	23	25	26	24	22	26	26	22	25	25	24	20	22	23	22	24	24	24
		13.4587	13.5828	13.1781	13.0947	13.5635	13.4915	13.3133	13.3868	13.3955	13.4435	13.6696	13.687	13.8304	13.8982	13.7369	13.5999	13.6369	13.2247	13.2967	13.867	BAK1	BAK1	BAK_HUMAN	Q16611	Q16611	Bcl-2 homologous antagonist/killer	NA	NA	NA	NA	2	2	2	3	2	3	2	3	2	3	2	3	2	3	3	2	3	3
		11.8989	11.8143	11.5309	11.7796	12.103	11.2957	11.9398	11.5022	11.7874	12.042	11.6857	11.8584	11.8424	11.7283	12.1963	11.8922	11.8337	11.8452	12.221	11.8512	ATG14	ATG14	BAKOR_HUMAN	Q6ZNE5	Q6ZNE5	Beclin 1-associated autophagy-related key regulator	NA	NA	NA	NA	2	2	2	2	2	2	2	2	2	2	2	2	2	2	2	2	2	2
		12.8829	12.8268	12.8437	12.9102	12.6435	13.0115	12.8462	12.9126	12.9771	12.8231	12.7289	12.8565	12.574	12.8446	12.6917	12.7953	12.7967	12.9853	13.1304	12.6513	BANP	BANP	BANP_HUMAN	Q8N9N5	Q8N9N5	Protein BANP	NA	NA	NA	NA	2	2	2	1	2	2	2	2	2	2	1	2	2	2	2	2	2	2
		11.9105	11.5957	11.3607	11.4426	11.7586	11.6729	11.7625	11.6924	11.8548	11.9986	11.6257	11.6674	11.7527	11.7318	11.8158	11.8317	11.8641	11.7359	11.7508	11.9434	BAP1	BAP1	BAP1_HUMAN	Q92560	Q92560	Ubiquitin carboxyl-terminal hydrolase BAP1	NA	NA	NA	NA	4	5	3	5	2	5	4	5	4	3	4	3	3	5	4	4	4	4
		14.3112	14.1281	13.984	14.5005	14.0602	14.5619	14.2702	14.0668	14.0937	13.8561	14.2283	14.073	14.2505	14.1973	14.0984	13.885	13.6231	14.0748	13.8715	13.968	BAP18	BAP18	BAP18_HUMAN	Q8IXM2	Q8IXM2	Chromatin complexes subunit BAP18	NA	NA	NA	NA	9	8	8	8	8	10	9	8	9	9	10	10	10	10	9	8	8	10
		15.6145	15.336	15.166	15.184	15.6038	15.5803	15.4263	15.3849	15.5743	15.5459	15.8861	15.8733	15.906	15.8659	15.9294	15.9512	15.8278	15.9592	16.0058	15.895	BCAP29	BCAP29	BAP29_HUMAN	Q9UHQ4	Q9UHQ4	B-cell receptor-associated protein 29	NA	NA	NA	NA	23	23	21	21	22	20	21	22	23	23	24	25	23	22	22	22	22	23
		17.8835	17.8008	17.7087	17.7646	17.8826	17.8951	17.8756	17.8316	17.9626	17.9386	18.1391	18.1011	18.1174	18.1248	18.1403	18.011	18.127	18.0591	18.0268	18.0309	BCAP31	BCAP31	BAP31_HUMAN	P51572	P51572	B-cell receptor-associated protein 31	NA	NA	NA	NA	40	42	42	42	41	43	41	39	43	42	42	44	45	43	43	42	43	43
		17.6884	17.8418	17.7782	17.8032	18.0032	17.7889	17.8874	17.885	18.1172	18.1194	18.014	18.2386	18.0789	18.0506	18.1053	18.054	18.1013	18.083	17.9829	18.0921	BSG	BSG	BASI_HUMAN	P35613	P35613	Basigin	SASP	NA	altered	NA	19	19	19	19	19	19	19	19	19	19	19	19	19	19	19	19	18	19
		19.1816	19.0624	19.0248	19.121	19.1568	19.2663	19.1719	19.0441	19.201	19.0839	19.1117	19.0585	19.1658	19.1135	19.0618	19.068	18.7725	18.8768	18.835	18.9257	BASP1	BASP1	BASP1_HUMAN	P80723	P80723	Brain acid soluble protein 1	SASP	NA	altered	NA	34	35	36	32	35	37	36	35	35	35	37	34	36	35	34	35	35	35
		16.9627	17.0254	17.15	16.8689	17.13	17.2474	16.9767	17.0115	17.4693	17.4011	17.3688	17.3405	17.3559	17.2718	17.2079	17.2782	17.2335	17.3461	17.4006	17.3917	BAX	BAX	BAX_HUMAN	Q07812	Q07812	Apoptosis regulator BAX	SASP	NA	altered	NA	18	19	21	21	21	20	19	20	20	19	20	21	19	20	21	19	20	19
		11.8389	11.7299	11.3389	11.3906	11.5033	11.6748	11.7885	11.7147	11.4482	11.9666	11.7452	11.7218	11.8016	11.6918	11.6004	11.7386	11.8766	11.6289	11.709	11.5228	BAZ1A	BAZ1A	BAZ1A_HUMAN	Q9NRL2	Q9NRL2	Bromodomain adjacent to zinc finger domain protein 1A	NA	NA	NA	NA	8	8	7	8	9	6	8	6	7	8	8	8	9	7	5	6	9	7
		14.3636	14.3355	14.1656	14.2857	14.405	14.454	14.4101	14.3203	14.2751	14.4392	14.3233	14.2932	14.3718	14.2369	14.1949	14.3896	14.3354	14.3074	14.2938	14.4088	BAZ1B	BAZ1B	BAZ1B_HUMAN	Q9UIG0	Q9UIG0	Tyrosine-protein kinase BAZ1B	NA	NA	NA	NA	41	41	40	36	40	42	45	46	42	43	42	38	40	42	35	41	38	42
		13.4314	13.1612	13.0323	12.8994	12.8722	13.3321	13.4241	13.1597	13.3895	13.1663	13.4899	13.2199	13.1942	12.751	13.1569	13.3074	13.2223	13.0639	13.202	13.1424	BAZ2A	BAZ2A	BAZ2A_HUMAN	Q9UIF9	Q9UIF9	Bromodomain adjacent to zinc finger domain protein 2A	NA	NA	NA	NA	8	7	4	4	6	7	8	7	5	7	5	6	6	5	8	8	6	8
		13.6135	13.8263	13.6738	13.8516	13.7042	13.7598	13.7541	13.6388	13.8851	13.6476	13.9968	14.133	14.0113	13.8903	14.0183	13.9691	13.9806	13.9209	13.8016	13.8436	BBS1	BBS1	BBS1_HUMAN	Q8NFJ9	Q8NFJ9	Bardet-Biedl syndrome 1 protein	NA	NA	NA	NA	9	11	12	9	14	13	10	11	11	11	9	10	10	8	10	12	8	8
		13.2395	13.3146	13.2664	13.1899	13.2891	13.273	13.3641	13.4025	13.3377	13.2862	13.5903	13.5884	13.5648	13.4929	13.486	13.6446	13.3453	13.4701	13.5253	13.5897	BBS2	BBS2	BBS2_HUMAN	Q9BXC9	Q9BXC9	Bardet-Biedl syndrome 2 protein	NA	NA	NA	NA	14	17	14	16	15	16	14	14	15	16	14	15	14	15	15	15	15	16
		12.0086	12.1386	12.1861	12.007	12.2625	12.3253	12.1806	12.1921	12.1754	12.2964	12.5333	12.6378	12.6687	12.5177	12.4749	12.6386	12.426	12.3327	12.4225	12.4736	BBS4	BBS4	BBS4_HUMAN	Q96RK4	Q96RK4	Bardet-Biedl syndrome 4 protein	NA	NA	NA	NA	9	11	10	11	11	11	11	12	9	11	11	11	11	12	11	12	12	11
		12.1921	12.0323	11.8342	11.9303	12.0371	12.292	12.3946	12.3031	11.9902	12.1792	12.5263	12.6111	12.6311	12.5801	12.5587	12.2193	12.4546	12.2938	12.5736	12.5815	BBS5	BBS5	BBS5_HUMAN	Q8N3I7	Q8N3I7	Bardet-Biedl syndrome 5 protein	NA	NA	NA	NA	4	4	4	4	4	4	4	3	4	4	3	3	3	3	2	4	2	2
		12.5078	12.3369	12.5196	12.471	12.3649	12.4651	12.6078	12.4943	12.4794	12.7221	12.7	12.7304	12.6371	12.6409	12.4653	12.7199	12.5814	12.7012	12.4493	12.8072	BBS7	BBS7	BBS7_HUMAN	Q8IWZ6	Q8IWZ6	Bardet-Biedl syndrome 7 protein	NA	NA	NA	NA	9	11	11	10	12	12	12	11	12	13	11	12	11	10	9	11	11	11
		11.7544	11.7002	11.8299	11.9073	11.6467	11.5516	11.9606	11.8979	11.7641	11.6733	11.7047	11.724	11.6295	11.6556	11.4141	11.7373	11.4431	11.4714	11.8567	11.5322	BBX	BBX	BBX_HUMAN	Q8WY36	Q8WY36	HMG box transcription factor BBX	NA	NA	NA	NA	4	4	5	5	4	4	5	5	4	4	4	3	5	5	4	5	3	3
		13.7881	14.2523	14.3334	14.3298	14.348	13.6814	14.2809	14.1532	14.2812	14.1469	13.27	13.6521	13.7109	13.7535	13.7059	13.6539	13.823	13.7844	13.7181	13.7475	BCAM	BCAM	BCAM_HUMAN	P50895	P50895	Basal cell adhesion molecule	NA	NA	NA	NA	14	18	17	19	18	16	18	19	19	18	16	16	13	14	14	18	15	15
		16.4526	17.0381	17.5096	17.5281	17.0357	16.1808	16.2095	16.964	16.9114	16.8815	16.6048	17.108	16.5476	16.6571	16.6028	17.0243	16.8904	16.6372	16.6881	16.4269	PIK3AP1	PIK3AP1	BCAP_HUMAN	Q6ZUJ8	Q6ZUJ8	Phosphoinositide 3-kinase adapter protein 1	NA	NA	NA	NA	2	2	2	2	2	2	2	2	2	2	2	2	2	2	2	2	2	2
		13.9946	13.9213	13.708	13.6214	13.7769	14.1236	13.9714	13.7127	13.8436	13.7595	13.8677	13.6492	13.8319	13.6777	13.8532	13.7069	13.5341	13.6994	13.7187	13.8077	BCAR1	BCAR1	BCAR1_HUMAN	P56945	P56945	Breast cancer anti-estrogen resistance protein 1	NA	NA	NA	NA	24	24	19	23	24	25	22	22	26	22	22	26	25	23	25	24	22	25
		12.6774	12.4779	12.5399	12.6328	12.5282	12.4586	12.4556	12.4039	12.1517	12.2621	12.4141	12.4711	12.4728	12.4971	12.48	12.5596	12.2388	12.3181	12.3043	12.3799	BCAR3	BCAR3	BCAR3_HUMAN	O75815	O75815	Breast cancer anti-estrogen resistance protein 3	NA	NA	NA	NA	17	17	15	18	17	17	17	16	17	19	16	18	20	18	17	19	12	18
		14.0176	14.2041	14.1809	14.2815	14.1991	14.219	14.168	14.2609	14.3073	14.2791	14.1146	14.1209	14.1675	13.9472	13.8369	14.17	13.9583	13.9592	13.9029	14.0191	BCAS3	BCAS3	BCAS3_HUMAN	Q9H6U6	Q9H6U6	Breast carcinoma-amplified sequence 3	NA	NA	NA	NA	20	21	21	21	18	21	21	19	21	21	20	19	20	20	18	19	18	17
		15.0966	15.2446	15.0571	15.3219	15.1245	15.0226	15.0217	15.1829	15.0544	14.9969	14.8154	14.659	14.8743	14.6773	14.7392	14.7192	14.8551	14.8048	14.4748	14.6634	BCAT1	BCAT1	BCAT1_HUMAN	P54687	P54687	Branched-chain-amino-acid aminotransferase, cytosolic	SASP	NA	altered	NA	9	11	11	11	10	11	11	9	11	11	11	10	10	11	10	8	7	9
		14.9176	14.9004	14.8865	14.8502	14.9144	14.8667	15.0572	15.0844	14.8761	14.8222	14.7577	14.8742	14.8623	14.8434	14.757	14.9824	14.8988	14.9566	15.0324	15.0185	BCAT2	BCAT2	BCAT2_HUMAN	O15382	O15382	Branched-chain-amino-acid aminotransferase, mitochondrial	NA	NA	NA	NA	22	24	25	22	24	24	24	22	25	26	24	25	24	24	24	23	24	24
		15.2683	15.2613	15.2254	15.0917	15.2252	15.0897	15.086	15.1571	14.9113	15.1101	14.9358	14.934	14.9606	14.8123	14.8504	14.9216	14.957	14.9053	14.753	14.9901	BCCIP	BCCIP	BCCIP_HUMAN	Q9P287	Q9P287	BRCA2 and CDKN1A-interacting protein	NA	NA	NA	NA	13	13	13	13	13	13	13	13	13	13	12	12	13	13	10	13	12	13
		11.0035	11.1508	11.1222	10.9974	11.1204	11.2165	10.6839	10.9843	10.9358	11.1181	11.6507	11.1334	11.4057	10.9248	11.1954	11.1572	11.5302	11.0257	11.0665	11.1393	ZNHIT6	ZNHIT6	BCD1_HUMAN	Q9NWK9	Q9NWK9	Box C/D snoRNA protein 1	NA	NA	NA	NA	2	3	3	3	2	2	2	2	2	3	2	2	1	1	2	2	1	1
		12.7394	12.5097	12.467	12.5416	12.6002	12.5756	12.4696	12.638	12.635	12.5858	12.4881	12.6312	12.5683	12.7332	12.7177	12.8551	12.8673	12.6487	12.4632	12.67	BCKDK	BCKDK	BCKD_HUMAN	O14874	O14874	[3-methyl-2-oxobutanoate dehydrogenase [lipoamide]] kinase, mitochondrial	NA	NA	NA	NA	8	8	8	8	8	8	8	8	8	8	8	8	8	8	7	8	7	8
		14.3329	14.2079	14.2764	14.3853	14.1349	14.3126	14.2705	14.2652	14.4185	14.3055	14.335	14.4252	14.4964	14.1648	14.3308	14.4319	14.1124	14.2818	14.2186	14.2637	BCL10	BCL10	BCL10_HUMAN	O95999	O95999	B-cell lymphoma/leukemia 10	NA	NA	NA	NA	10	12	11	11	12	12	10	11	12	11	12	12	11	11	11	11	10	10
		14.335	14.6173	14.8482	15.172	14.927	14.6798	14.6734	14.699	14.9514	14.9213	14.2581	14.2265	14.3188	14.3038	13.8933	14.5312	13.9339	14.2175	14.1987	14.3695	BCL7B	BCL7B;BCL7C	BCL7B_HUMAN;BCL7C_HUMAN	Q8WUZ0;Q9BQE9	Q4VC05;Q9BQE9;Q8WUZ0	B-cell CLL/lymphoma 7 protein family member C	NA	NA	NA	NA	1	1	1	1	1	1	1	1	1	1	1	1	1	1	1	1	1	1
		13.9524	13.7682	13.7125	13.9525	13.9623	14.071	13.9655	13.7989	13.67	13.5528	13.4721	13.2431	13.5302	13.3191	13.4031	13.8178	13.3514	13.4129	13.4056	13.4904	BCL7C	BCL7C	BCL7C_HUMAN	Q8WUZ0	Q8WUZ0	B-cell CLL/lymphoma 7 protein family member C	NA	NA	NA	NA	2	2	2	2	2	2	2	2	2	2	2	2	2	2	2	2	2	2
		13.7444	13.1919	13.3979	13.3424	13.1906	13.7326	13.618	13.3163	13.4134	13.1498	13.263	13.0438	13.4104	12.9298	13.1728	13.2518	13.0394	13.2166	12.9233	13.2644	BCL9L	BCL9L	BCL9L_HUMAN	Q86UU0	Q86UU0	B-cell CLL/lymphoma 9-like protein	NA	NA	NA	NA	9	7	5	6	8	9	9	8	9	7	9	8	6	7	8	8	6	7
		11.5873	11.4274	11.547	11.0885	11.478	11.16	11.0908	11.3658	11.2852	11.0894	11.1314	11.4139	11.4239	11.4837	11.5854	11.4102	11.8028	11.2655	11.3705	11.1743	BCLAF3	BCLAF3	BCLA3_HUMAN	A2AJT9	A2AJT9	BCLAF1 and THRAP3 family member 3	NA	NA	NA	NA	4	4	4	5	3	4	5	4	4	3	3	3	3	2	3	3	3	3
		17.3613	17.1308	17.1019	17.0781	17.1693	17.1619	17.1838	17.1954	17.2178	17.2702	17.1607	17.1285	17.2096	17.1733	17.1749	17.1738	17.1841	17.1481	17.2023	17.245	BCLAF1	BCLAF1	BCLF1_HUMAN	Q9NYF8	Q9NYF8	Bcl-2-associated transcription factor 1	NA	NA	NA	NA	60	67	68	71	70	70	66	65	67	67	68	66	64	64	63	66	66	67
		13.4239	14.2157	14.919	9.27136	14.4769	14.1486	13.1932	13.9534	14.0569	14.2405	12.809	12.939	13.1169	12.819	13.025	13.4517	12.4928	12.1503	12.9371	12.834	BCLAF1.1	BCLAF1;THRAP3	BCLF1_HUMAN;TR150_HUMAN	Q9NYF8;Q9Y2W1	Q9NYF8;Q9Y2W1	Bcl-2-associated transcription factor 1	NA	NA	NA	NA	1	1	1	0	1	1	1	1	1	1	1	1	1	1	1	1	1	1
		13.0561	12.9673	12.958	12.896	13.0389	13.1636	13.1007	13.1612	13.0393	13.2301	13.0977	13.1253	13.1488	13.0453	13.0699	13.2441	12.983	12.9645	13.1036	13.1879	BCR	BCR	BCR_HUMAN	P11274	P11274	Breakpoint cluster region protein	NA	NA	NA	NA	20	19	18	19	19	20	22	21	21	22	21	25	19	23	20	22	20	23
		12.9736	13.0479	12.7753	12.8716	12.9441	12.9908	13.0702	13.0643	12.9514	12.9905	12.7639	12.8561	12.8688	12.8178	12.701	13.0624	12.9266	13.0165	13.0041	13.0541	BCS1L	BCS1L	BCS1_HUMAN	Q9Y276	Q9Y276	Mitochondrial chaperone BCS1	NA	NA	NA	NA	14	14	16	16	17	19	15	17	18	17	15	12	17	15	12	12	11	14
		13.1013	12.7984	12.8705	12.8816	12.8946	13.0681	13.1092	13.1284	13.0775	13.0998	13.1558	13.0029	13.1231	13.0074	13.0494	13.0774	13.0824	13.0647	13.0638	13.0988	BOD1L1	BOD1L1	BD1L1_HUMAN	Q8NFC6	Q8NFC6	Biorientation of chromosomes in cell division protein 1-like 1	NA	NA	NA	NA	47	47	45	47	49	53	51	50	57	53	51	50	47	57	43	52	54	52
		12.2468	12.4855	12.6923	12.6713	12.2178	12.6327	12.6433	12.6379	12.6876	12.6787	11.8377	11.9184	11.659	11.6225	11.4081	11.9474	11.6229	11.7153	11.8358	12.2078	BDH1	BDH1	BDH_HUMAN	Q02338	Q02338	D-beta-hydroxybutyrate dehydrogenase, mitochondrial	NA	NA	NA	NA	3	3	3	3	3	3	3	3	3	3	3	3	1	2	2	3	3	3
		15.7347	15.893	15.9343	15.808	15.8198	15.8424	15.8628	15.7723	15.8359	15.9706	16.0012	16.0274	16.0405	15.9786	15.7736	16.0596	15.9481	15.7956	15.7257	15.9	BDH2	BDH2	BDH2_HUMAN	Q9BUT1	Q9BUT1	3-hydroxybutyrate dehydrogenase type 2	SASP	NA	down	NA	15	16	15	14	15	15	14	16	15	15	15	16	16	16	15	15	16	16
		12.9163	13.0293	13.1001	13.172	13.1818	13.0876	13.0386	13.076	13.1086	13.1666	13.1882	13.073	13.1066	13.0971	12.9744	12.9868	12.9678	12.9095	12.8587	13.064	BECN1	BECN1	BECN1_HUMAN	Q14457	Q14457	Beclin-1	NA	NA	NA	NA	11	12	11	11	11	12	11	11	12	10	10	10	11	11	11	10	9	12
		15.6774	15.4716	15.5211	15.5462	15.4329	15.5247	15.4393	15.5423	15.8475	15.8014	15.8963	15.8589	15.6087	15.582	15.627	15.4957	15.7177	15.2888	15.1415	15.2295	BET1	BET1	BET1_HUMAN	O15155	O15155	BET1 homolog	NA	NA	NA	NA	4	4	4	4	4	4	3	4	3	4	3	3	4	3	4	3	4	4
		14.1683	14.2781	14.5573	14.4947	14.3983	14.4366	14.4386	14.4305	14.4257	14.2636	14.2761	14.1212	14.1875	14.0916	13.6814	14.0625	14.0679	14.1044	13.841	13.9937	BET1L	BET1L	BET1L_HUMAN	Q9NYM9	Q9NYM9	BET1-like protein	NA	NA	NA	NA	5	5	5	5	6	5	5	5	6	6	6	5	5	5	4	4	5	6
		11.3622	11.0872	11.3796	11.2216	11.2874	11.2188	11.5162	11.295	11.4702	10.9454	11.6489	11.6407	11.3139	11.4173	11.4524	11.7973	11.1943	11.2144	11.2041	10.9499	BFAR	BFAR	BFAR_HUMAN	Q9NZS9	Q9NZS9	Bifunctional apoptosis regulator	NA	NA	NA	NA	1	2	1	2	2	2	2	2	3	2	2	3	2	2	1	1	2	2
		16.902	16.8984	17.0153	16.9916	16.9751	17.0666	16.9923	17.0869	17.134	17.1182	17.306	17.4868	17.298	17.3412	17.3591	17.3283	17.438	17.3889	17.4118	17.4508	GLB1	GLB1	BGAL_HUMAN	P16278	P16278	Beta-galactosidase	NA	NA	NA	NA	23	23	24	23	23	24	22	23	23	24	22	24	22	24	24	24	24	24
		13.7675	14.3676	14.8443	15.3002	14.5171	14.5639	14.4672	14.5558	14.7313	14.5499	14.3709	13.9593	14.4607	14.1102	13.8545	14.2533	13.6777	13.994	13.6835	13.9786	GLB1.1	GLB1;GLB1L	BGAL_HUMAN;GLB1L_HUMAN	P16278;Q6UWU2	P16278;Q6UWU2	Beta-galactosidase	NA	NA	NA	NA	1	1	1	1	1	1	1	1	1	1	1	1	1	1	1	1	1	1
		13.3031	13.2236	13.064	13.3155	13.241	13.1109	13.2871	13.2992	13.2904	13.1031	13.3967	13.5284	13.5821	13.6618	13.4347	13.3864	13.6903	13.5527	13.6731	13.6415	TGFBI	TGFBI	BGH3_HUMAN	Q15582	Q15582	Transforming growth factor-beta-induced protein ig-h3	SASP	NA	altered	NA	10	12	12	10	10	9	10	11	11	12	11	9	10	9	11	11	11	11
		15.4471	15.4415	15.4804	15.4151	15.5247	15.5748	15.5635	15.6005	15.5659	15.5186	15.7216	15.8571	15.6823	15.7404	15.6631	15.84	15.7902	15.8283	15.6663	15.744	GUSB	GUSB	BGLR_HUMAN	P08236	P08236	Beta-glucuronidase	NA	NA	NA	NA	19	18	19	19	18	22	20	20	21	19	18	18	20	20	20	20	18	20
		15.7573	15.7003	15.396	15.4611	15.7124	15.6133	15.8035	15.8075	15.8137	15.7562	15.6533	15.8228	15.853	15.9176	16.0057	15.9923	16.1189	16.0234	16.0931	16.1377	TMBIM6	TMBIM6	BI1_HUMAN	P55061	P55061	Bax inhibitor 1	NA	NA	NA	NA	4	5	5	5	5	5	5	5	5	5	5	5	5	5	5	5	5	5
		11.9212	11.5508	11.6453	11.6729	11.4807	11.7296	12.0058	11.5707	11.9827	11.9126	12.0937	12.0243	11.8694	11.8528	12.0113	11.6617	11.6579	11.9075	11.998	12.1231	BAIAP2L1	BAIAP2L1	BI2L1_HUMAN	Q9UHR4	Q9UHR4	Brain-specific angiogenesis inhibitor 1-associated protein 2-like protein 1	NA	NA	NA	NA	3	3	3	3	3	3	3	3	2	3	3	3	2	3	3	3	3	2
		15.041	15.0933	15.0763	15.1601	15.1931	15.3068	15.1821	15.1321	15.2339	15.2821	15.0251	15.0556	15.1096	14.9504	14.9446	15.0316	14.9099	14.938	14.8057	14.9256	BICC1	BICC1	BICC1_HUMAN	Q9H694	Q9H694	Protein bicaudal C homolog 1	NA	NA	NA	NA	39	42	40	41	37	40	40	40	43	43	34	41	38	36	35	40	39	39
		11.6686	11.3504	11.1106	11.2151	11.4544	11.3972	11.3315	11.2777	11.0956	11.3367	11.29	10.7817	11.1265	11.3096	11.1532	11.1599	11.2411	11.453	11.55	11.0048	BICD1.1	BICD1	BICD1_HUMAN	Q96G01	Q96G01	Protein bicaudal D homolog 1	NA	NA	NA	NA	6	6	8	7	8	7	6	7	7	8	6	4	5	5	4	3	2	4
		11.9954	11.6816	11.2178	11.3521	11.7353	11.6538	11.8883	11.6197	11.5952	11.7994	11.8464	11.8264	11.6257	11.7602	11.885	11.9425	11.8295	11.9326	12.202	11.8417	BICD1	BICD1;BICD2	BICD1_HUMAN;BICD2_HUMAN	Q8TD16;Q96G01	Q96G01;Q8TD16	Protein bicaudal D homolog 2	NA	NA	NA	NA	4	5	4	5	5	4	4	5	5	4	4	3	2	5	3	5	3	5
		13.3332	13.1634	13.2284	13.1712	13.2419	13.3027	13.2816	13.041	13.2727	13.2246	13.1037	13.0152	13.1999	13.1506	13.206	13.1999	13.1338	13.0329	13.1328	13.1694	BICD2	BICD2	BICD2_HUMAN	Q8TD16	Q8TD16	Protein bicaudal D homolog 2	NA	NA	NA	NA	25	26	24	24	25	26	28	23	26	28	26	21	26	26	28	24	25	27
		10.8137	9.95833	10.4552	10.1313	9.97954	10.6229	11.0312	10.5431	10.3363	10.2953	10.8421	10.3327	10.7132	10.7028	10.25	10.8166	9.74779	10.4674	10.5018	10.9539	BICRA	BICRA	BICRA_HUMAN	Q9NZM4	Q9NZM4	BRD4-interacting chromatin-remodeling complex-associated protein	NA	NA	NA	NA	1	1	1	1	1	1	2	1	1	2	2	1	1	2	1	2	1	1
		10.8238	10.4591	10.3539	10.3578	10.4296	10.6006	10.8895	10.234	10.4829	10.4202	10.7102	10.8007	10.4191	9.80605	10.8448	10.6845	10.1184	10.7998	10.6232	10.2975	BICRAL	BICRAL	BICRL_HUMAN	Q6AI39	Q6AI39	BRD4-interacting chromatin-remodeling complex-associated protein-like	NA	NA	NA	NA	1	2	1	1	2	2	1	2	2	2	2	1	2	0	1	1	0	2
		14.2108	14.328	14.1849	14.1694	13.7937	14.0402	14.0918	14.0763	14.0641	14.0859	14.0431	14.1369	13.8535	13.9702	14.013	13.9513	13.9345	14.0663	14.0321	13.9102	BID	BID	BID_HUMAN	P55957	P55957	BH3-interacting domain death agonist	SASP	NA	up	NA	11	12	11	11	13	13	12	11	11	11	13	11	11	11	12	12	9	10
		17.6386	17.5314	17.3953	17.4746	17.549	17.6729	17.7473	17.612	17.5273	17.7137	17.7588	17.8523	17.7276	17.7753	17.7246	17.8147	17.8179	17.8751	17.8935	17.9315	BLVRA	BLVRA	BIEA_HUMAN	P53004	P53004	Biliverdin reductase A	NA	NA	NA	NA	20	22	20	21	22	21	19	21	19	18	17	20	21	21	19	20	19	19
		15.0613	14.9207	14.7639	14.8394	14.9567	15.0058	15.0755	14.998	14.888	14.9356	14.9682	14.9518	15.0548	15.0287	15.0353	14.9069	14.922	14.8933	14.9534	14.9765	ARFGEF1.1	ARFGEF1	BIG1_HUMAN	Q9Y6D6	Q9Y6D6	Brefeldin A-inhibited guanine nucleotide-exchange protein 1	NA	NA	NA	NA	40	43	43	42	43	45	43	43	44	43	42	40	39	38	40	39	41	41
		15.279	15.098	15.07	15.0395	15.174	15.339	15.2003	15.2474	15.1906	15.2276	15.198	15.1862	15.2795	15.2279	15.2769	15.3166	15.1493	15.2559	15.3076	15.2899	ARFGEF1	ARFGEF1;ARFGEF2	BIG1_HUMAN;BIG2_HUMAN	Q9Y6D5;Q9Y6D6	Q9Y6D6;Q9Y6D5	Brefeldin A-inhibited guanine nucleotide-exchange protein 2	NA	NA	NA	NA	16	16	14	17	14	17	17	16	17	17	15	16	16	16	16	17	15	17
		14.6648	14.437	14.2843	14.3557	14.5368	14.6091	14.6752	14.5084	14.6345	14.488	14.6457	14.5862	14.6957	14.7199	14.6244	14.6489	14.5052	14.6145	14.7245	14.7295	ARFGEF2	ARFGEF2	BIG2_HUMAN	Q9Y6D5	Q9Y6D5	Brefeldin A-inhibited guanine nucleotide-exchange protein 2	NA	NA	NA	NA	38	41	39	34	35	39	35	39	39	37	37	33	38	38	38	38	36	39
		15.2886	14.6836	14.5873	14.7125	15.0075	15.2693	15.084	14.8859	15.0287	14.9586	15.2978	15.0868	15.2198	15.1664	15.3141	15.1606	15.0495	15.2244	15.232	15.1946	BIN1	BIN1	BIN1_HUMAN	O00499	O00499	Myc box-dependent-interacting protein 1	NA	NA	NA	NA	22	23	25	25	24	26	22	23	24	25	26	25	25	26	24	24	22	25
		13.3936	13.3332	13.4292	13.4285	13.5435	13.3909	13.3992	13.3988	13.4327	13.5567	13.2886	13.2465	13.1418	13.099	13.1499	13.2197	12.9753	13.0436	12.9637	13.0935	BIN3	BIN3	BIN3_HUMAN	Q9NQY0	Q9NQY0	Bridging integrator 3	NA	NA	NA	NA	11	14	10	12	11	12	13	12	14	13	11	13	13	12	11	12	12	12
		19.8309	19.8849	19.7505	19.7703	19.7515	19.7542	19.8243	19.8592	19.9052	19.991	19.802	19.9023	19.8544	19.8239	19.7381	19.8389	19.9067	19.8301	19.7673	19.8173	HSPA5	HSPA5	BIP_HUMAN	P11021	P11021	Endoplasmic reticulum chaperone BiP	SASP	NA	altered	NA	106	111	107	106	109	107	103	105	105	105	101	105	106	103	101	102	103	103
		20.2785	20.3041	20.5811	20.5559	20.4043	20.3617	20.3502	20.3686	20.376	20.4445	20.3853	20.3197	20.3822	20.2334	20.1522	20.3571	20.2329	20.1716	20.2669	20.2979	HSPA1L	HSPA1L;HSPA2;HSPA5;HSPA8	BIP_HUMAN;HS71L_HUMAN;HSP72_HUMAN;HSP7C_HUMAN	P11021;P11142;P34931;P54652	P11021;P0DMV8;P0DMV9;P34931;P54652;P11142	Endoplasmic reticulum chaperone BiP	SASP	NA	altered;down	NA	3	3	3	3	3	3	3	3	3	3	3	3	3	3	3	3	3	3
		12.9195	13.0991	13.1588	13.2146	13.1888	13.0421	12.8693	13.0913	12.9699	12.9755	12.8149	12.8989	12.7592	12.7547	12.5124	12.7725	12.6216	12.7319	12.6266	12.7715	BIRC2	BIRC2	BIRC2_HUMAN	Q13490	Q13490	Baculoviral IAP repeat-containing protein 2	NA	NA	NA	NA	11	12	12	11	10	12	12	12	11	12	10	9	11	10	9	10	11	11
		13.9715	13.9991	13.9184	13.9106	13.9469	13.8675	13.8576	13.9226	13.8804	13.906	13.8161	13.7847	13.7979	13.7737	13.8505	13.9069	13.7799	13.6732	13.7231	13.8114	BIRC6	BIRC6	BIRC6_HUMAN	Q9NR09	Q9NR09	Baculoviral IAP repeat-containing protein 6	NA	NA	NA	NA	41	54	48	52	49	53	50	55	52	52	45	41	44	46	39	46	40	49
		15.2251	14.9879	15.2813	14.9568	15.2899	15.2724	15.1423	15.2461	15.4408	15.5578	15.1616	15.3798	15.1426	15.1849	15.2036	15.0959	15.118	15.2396	15.1866	15.0999	BDKRB2	BDKRB2	BKRB2_HUMAN	P30411	P30411	B2 bradykinin receptor	NA	NA	NA	NA	7	7	6	6	6	7	7	7	7	7	7	6	7	7	7	7	7	7
		11.7273	11.3406	11.5363	11.9239	11.6527	11.769	11.8821	11.5962	11.6582	11.9198	11.7311	11.7298	11.6138	11.6397	11.6718	11.6874	11.7971	11.5933	11.5862	11.6131	BLOC1S1	BLOC1S1	BL1S1_HUMAN	P78537	P78537	Biogenesis of lysosome-related organelles complex 1 subunit 1	NA	NA	NA	NA	2	1	3	3	2	2	3	3	3	2	1	3	2	3	2	1	1	3
		13.9594	13.7743	13.6814	14.043	13.573	14.1129	13.9819	13.82	13.625	13.5437	13.5081	13.521	13.5643	13.6533	13.8008	13.236	13.0188	13.7986	13.6384	13.6476	BLOC1S2	BLOC1S2	BL1S2_HUMAN	Q6QNY1	Q6QNY1	Biogenesis of lysosome-related organelles complex 1 subunit 2	NA	NA	NA	NA	4	4	4	4	3	4	3	4	4	3	4	4	4	4	4	3	4	3
		14.2356	14.1517	14.2312	14.0123	14.2206	14.5207	14.2979	14.1817	14.2855	14.1762	13.9639	13.992	13.9999	13.8098	13.7431	13.9246	13.6597	13.5689	13.4346	13.8052	BLOC1S3	BLOC1S3	BL1S3_HUMAN	Q6QNY0	Q6QNY0	Biogenesis of lysosome-related organelles complex 1 subunit 3	NA	NA	NA	NA	6	6	6	5	6	6	6	6	6	6	6	4	4	5	6	6	5	5
		12.9549	12.9957	12.8959	12.608	12.9438	13.1372	12.9349	13.0698	13.0856	12.7883	12.9987	13.0094	13.1251	13.0917	13.0596	13.1178	12.8761	12.9412	13.0002	13.0648	BLOC1S4	BLOC1S4	BL1S4_HUMAN	Q9NUP1	Q9NUP1	Biogenesis of lysosome-related organelles complex 1 subunit 4	NA	NA	NA	NA	7	8	8	8	8	8	8	8	8	8	8	7	8	7	7	8	8	8
		13.3847	13.0328	12.8396	13.3134	13.099	13.1868	13.3425	13.0486	13.1512	13.0838	13.2025	13.1241	13.3294	13.2302	13.1059	13.1732	13.0258	12.9548	13.0822	13.0749	BLOC1S5	BLOC1S5	BL1S5_HUMAN	Q8TDH9	Q8TDH9	Biogenesis of lysosome-related organelles complex 1 subunit 5	NA	NA	NA	NA	13	14	15	13	13	15	13	13	15	15	14	15	14	14	14	12	13	13
		12.1307	12.1245	11.744	11.6259	11.7438	12.3512	11.7749	12.0978	11.9798	11.4818	12.0233	12.0492	11.6776	12.0737	11.901	11.9373	12.0215	12.2509	12.3053	12.2655	BLOC1S6	BLOC1S6	BL1S6_HUMAN	Q9UL45	Q9UL45	Biogenesis of lysosome-related organelles complex 1 subunit 6	NA	NA	NA	NA	1	2	2	2	3	2	1	1	1	2	2	2	2	1	1	1	1	1
		15.8937	15.8399	15.9618	15.7814	15.8999	15.8961	16.2312	16.0488	16.008	16.1193	16.1347	16.2048	16.0603	16.031	16.2242	16.1349	16.1685	16.0744	15.9949	16.0572	BLMH	BLMH	BLMH_HUMAN	Q13867	Q13867	Bleomycin hydrolase	SASP	NA	down	NA	24	24	25	25	27	26	23	24	27	24	22	23	23	22	21	24	23	24
		17.2242	17.1465	17.1696	17.118	17.2335	17.3283	17.3565	17.3663	17.524	17.4118	17.5101	17.5088	17.5359	17.4909	17.4742	17.428	17.472	17.5155	17.4777	17.4749	BLVRB	BLVRB	BLVRB_HUMAN	P30043	P30043	Flavin reductase (NADPH)	NA	NA	NA	NA	13	13	14	13	14	15	13	13	15	14	14	14	15	14	14	15	14	15
		11.0828	11.3731	11.0939	11.6415	11.1878	10.8158	11.2492	11.7712	11.1148	11.5441	10.9539	11.4814	10.4884	10.4085	10.898	10.2883	10.4066	11.4261	10.5802	10.8691	ARNTL	ARNTL	BMAL1_HUMAN	O00327	O00327	Aryl hydrocarbon receptor nuclear translocator-like protein 1	NA	NA	NA	NA	1	1	1	1	1	2	0	1	2	1	2	1	1	0	1	0	1	1
		12.1592	12.0709	12.4104	12.401	12.3527	12.3358	12.4394	12.5255	12.507	12.5007	12.1845	11.6445	12.209	12.3036	11.9017	12.2774	12.1463	12.168	12.1127	11.9953	BMI1	BMI1	BMI1_HUMAN	P35226	P35226;P35227	Polycomb complex protein BMI-1	NA	NA	NA	NA	3	3	3	3	3	3	3	3	3	3	2	2	3	3	3	3	3	3
		12.5662	12.4064	12.5852	12.6663	12.4248	12.3707	12.7385	12.7179	12.5979	12.7458	12.5124	12.4943	12.6287	12.6029	12.6156	12.535	12.6325	12.5566	12.6051	12.8152	BMP1	BMP1	BMP1_HUMAN	P13497	P13497	Bone morphogenetic protein 1	SASP	NA	down	NA	5	8	7	7	8	7	9	7	8	8	7	7	7	7	6	8	7	7
		10.9143	11.0226	10.1942	10.9481	11.451	11.5555	11.1514	9.14275	11.2012	11.3303	11.2833	11.2556	11.2797	11.2602	11.4061	11.4608	11.3297	11.3283	11.013	10.9259	BMP2	BMP2	BMP2_HUMAN	P12643	P12643	Bone morphogenetic protein 2	NA	NA	NA	NA	1	1	0	1	1	1	1	0	1	1	1	1	1	1	1	1	1	1
		14.7689	14.7753	14.5487	14.548	14.7712	14.8754	14.8398	14.695	14.747	14.7721	14.7143	14.6601	14.5749	14.5758	14.624	14.6781	14.6019	14.5761	14.6373	14.507	BMP2K	BMP2K	BMP2K_HUMAN	Q9NSY1	Q9NSY1	BMP-2-inducible protein kinase	NA	NA	NA	NA	20	20	22	23	22	21	20	23	21	22	21	19	22	22	19	21	22	22
		14.5781	14.3168	14.4023	14.3231	14.7081	14.4732	14.6938	14.4842	14.4077	14.4461	14.5841	14.6204	14.5358	14.6201	14.6249	14.5049	14.3478	14.397	14.2375	14.5127	BMPR2	BMPR2	BMPR2_HUMAN	Q13873	Q13873	Bone morphogenetic protein receptor type-2	NA	NA	NA	NA	7	5	6	6	5	8	8	8	6	8	7	7	6	7	7	6	4	8
		12.7066	12.2396	12.444	12.8939	12.2726	12.2596	12.6896	12.8304	12.6133	12.6348	12.1518	12.2887	12.2123	12.2036	11.9251	12.0186	12.0975	11.7099	12.3245	11.6867	BMPR1A	BMPR1A	BMR1A_HUMAN	P36894	P36894;O00238	Bone morphogenetic protein receptor type-1A	NA	NA	NA	NA	1	2	2	2	2	1	2	1	2	2	2	2	1	2	1	2	2	1
		14.6774	14.5625	14.584	14.5215	14.5663	14.6378	14.7555	14.6904	14.5962	14.6325	14.8786	14.8658	14.7516	14.7055	14.7646	14.7963	14.7106	14.7001	14.8143	14.8179	BMS1	BMS1	BMS1_HUMAN	Q14692	Q14692	Ribosome biogenesis protein BMS1 homolog	SASP	NA	up	NA	35	36	36	34	35	38	37	37	39	38	38	37	38	38	35	37	35	35
		11.351	11.1591	10.1849	10.1963	11.275	11.4527	11.4755	11.1403	10.9713	11.6416	10.7633	11.2648	10.4936	10.0453	10.6288	11.3037	10.7033	10.4048	9.34096	9.9296	BNC1	BNC1;BNC2	BNC1_HUMAN;BNC2_HUMAN	Q01954;Q6ZN30	Q01954;Q6ZN30	Zinc finger protein basonuclin-1	NA	NA	NA	NA	1	1	1	1	1	1	1	1	1	1	1	1	1	1	1	1	1	1
		12.334	12.3317	12.1169	11.9753	12.4384	12.4608	12.2719	12.2787	12.2073	12.2154	12.1831	11.9956	12.2003	11.9379	12.0305	12.1371	11.9503	12.1824	12.1017	12.1326	BNC2	BNC2	BNC2_HUMAN	Q6ZN30	Q01954;Q6ZN30	Zinc finger protein basonuclin-2	NA	NA	NA	NA	7	7	6	7	7	7	7	7	8	8	6	6	6	4	3	7	5	7
		13.3369	13.0499	12.3447	12.7478	13.6143	13.5786	13.9799	13.108	13.6975	13.5956	13.798	13.8256	13.7853	13.8868	13.9683	13.793	13.7977	14.1236	14.1578	13.9224	BNIP3L	BNIP3L	BNI3L_HUMAN	O60238	O60238	BCL2/adenovirus E1B 19 kDa protein-interacting protein 3-like	NA	NA	NA	NA	4	5	4	5	5	5	5	4	4	3	5	4	5	5	5	4	4	4
		13.9902	14.0105	13.5253	13.4261	13.9852	14.0501	13.8821	14.0461	14.4252	14.0528	14.0568	14.4318	14.2655	14.1383	14.1207	14.3805	14.4639	14.5343	14.5134	14.6344	BNIP3	BNIP3;BNIP3L	BNI3L_HUMAN;BNIP3_HUMAN	O60238;Q12983	O60238;Q12983	BCL2/adenovirus E1B 19 kDa protein-interacting protein 3-like	NA	NA	NA	NA	2	2	2	2	2	2	2	2	2	2	1	2	2	2	2	2	2	2
		14.7547	14.5313	14.4841	14.4314	14.55	14.6273	14.779	14.5158	14.4112	14.3174	14.5733	14.5843	14.6467	14.5771	14.6715	14.7216	14.4184	14.6594	14.7294	14.6762	BNIP2	BNIP2	BNIP2_HUMAN	Q12982	Q12982	BCL2/adenovirus E1B 19 kDa protein-interacting protein 2	SASP	NA	up	NA	5	5	5	5	5	5	5	5	5	5	5	5	5	5	5	5	5	5
		11.9867	11.6427	12.0174	11.8753	11.547	12.2252	12.2241	12.3136	12.1304	12.0663	12.1909	12.2718	12.2208	12.3129	12.2006	12.3759	12.7025	12.1801	12.2216	12.4648	BNIP3.1	BNIP3	BNIP3_HUMAN	Q12983	Q12983	BCL2/adenovirus E1B 19 kDa protein-interacting protein 3	NA	NA	NA	NA	4	4	3	4	4	3	4	4	4	4	4	4	4	4	4	4	4	4
		9.99466	10.3149	10.6737	9.47988	10.0818	11.1778	11.414	10.8712	10.8582	10.7492	10.1246	11.1537	9.94892	11.4201	11.2922	10.5234	10.8644	11.282	11.1141	11.209	BOK	BOK	BOK_HUMAN	Q9UMX3	Q9UMX3	Bcl-2-related ovarian killer protein	NA	NA	NA	NA	1	1	0	1	1	2	2	2	2	2	1	2	2	2	2	2	2	2
		15.7834	15.7925	15.6867	15.5218	15.3681	15.7133	15.632	15.8997	15.7822	15.6122	15.9736	16.0712	16.0007	15.9614	15.8366	15.6327	15.8155	15.7561	15.7622	15.6447	BOLA1	BOLA1	BOLA1_HUMAN	Q9Y3E2	Q9Y3E2	BolA-like protein 1	NA	NA	NA	NA	2	4	3	4	3	3	4	5	4	5	4	3	5	5	4	5	3	4
		14.8587	14.6827	14.2734	14.5224	14.6112	14.729	14.8653	14.7452	14.6793	14.7134	15.0317	15.1411	15.0766	14.914	14.9803	14.8403	14.8967	15.1401	14.9818	14.9153	BOLA2	BOLA2	BOLA2_HUMAN	Q9H3K6	Q9H3K6	BolA-like protein 2	SASP	NA	up	NA	7	7	7	8	8	7	8	7	7	8	8	8	7	7	8	6	8	8
		13.4456	13.0965	12.7173	12.943	13.3138	13.227	13.4274	13.1633	13.0989	13.0917	13.1299	13.2424	13.1974	13.0188	13.1924	13.1838	13.1868	13.2162	13.1223	13.1317	BOLA3	BOLA3	BOLA3_HUMAN	Q53S33	Q53S33	BolA-like protein 3	NA	NA	NA	NA	5	6	6	6	6	5	4	5	5	6	6	5	5	6	5	6	5	5
		15.2957	15.3427	15.3128	15.4342	15.3183	15.4397	15.4272	15.2985	15.3852	15.411	15.3617	15.3169	15.2673	15.2117	15.1992	15.3518	15.1883	15.1858	15.1225	15.248	BOP1	BOP1	BOP1_HUMAN	Q14137	Q14137	Ribosome biogenesis protein BOP1	NA	NA	NA	NA	20	20	20	19	19	21	18	20	19	21	20	21	21	21	20	20	20	20
		13.1583	13.5056	13.1986	13.4147	13.1293	13.3088	13.4961	13.4329	13.364	13.2186	13.2981	13.4743	13.4001	13.2018	12.9459	13.1193	13.0225	13.0912	13.1877	13.0805	BORCS5	BORCS5	BORC5_HUMAN	Q969J3	Q969J3	BLOC-1-related complex subunit 5	NA	NA	NA	NA	6	7	7	7	7	7	7	7	5	6	7	5	8	7	8	8	8	7
		12.7975	12.7109	12.2784	12.1385	12.684	12.8669	13.0055	12.8507	12.8513	12.5153	12.9248	12.8457	12.7107	12.7472	12.7484	12.8969	12.8745	12.7616	12.7022	12.8249	BORCS6	BORCS6	BORC6_HUMAN	Q96GS4	Q96GS4	BLOC-1-related complex subunit 6	NA	NA	NA	NA	6	5	5	5	6	6	5	5	5	5	6	6	6	7	6	6	7	7
		12.5687	12.4064	12.0211	12.3672	12.146	12.6127	12.8511	12.3205	12.4391	12.2294	12.7675	12.564	12.6549	12.5062	12.5728	12.6825	12.2681	12.6877	12.7027	12.6256	BORCS7	BORCS7	BORC7_HUMAN	Q96B45	Q96B45	BLOC-1-related complex subunit 7	NA	NA	NA	NA	4	4	4	4	3	4	4	3	4	4	4	4	4	4	4	4	4	4
		14.4754	14.2965	13.8385	14.3268	14.2854	14.4097	14.2753	14.2701	14.1584	14.077	14.4114	14.3093	14.4432	14.4351	14.2057	14.3321	14.1903	14.2139	14.1795	14.282	CDC42EP2	CDC42EP2	BORG1_HUMAN	O14613	O14613	Cdc42 effector protein 2	NA	NA	NA	NA	8	9	9	9	9	10	11	11	11	10	10	8	10	9	7	10	7	10
		14.0153	14.0185	13.8586	14.0276	13.7971	13.8966	13.8145	13.6259	13.9432	13.7583	13.5894	13.7118	13.6919	13.7703	13.6622	13.6354	13.5273	13.6883	13.2841	13.5905	CDC42EP3	CDC42EP3	BORG2_HUMAN	Q9UKI2	Q9UKI2	Cdc42 effector protein 3	NA	NA	NA	NA	8	9	8	9	8	8	9	8	9	9	8	8	7	8	8	8	7	8
		14.4156	14.4642	14.3716	14.3382	14.3714	14.4764	14.419	14.4054	14.5236	14.4607	14.4003	14.4054	14.3334	14.2084	14.1837	14.2266	14.24	14.1945	14.1685	14.2041	CDC42EP4	CDC42EP4	BORG4_HUMAN	Q9H3Q1	Q9H3Q1	Cdc42 effector protein 4	NA	NA	NA	NA	14	15	15	15	15	15	14	15	15	16	16	16	16	14	14	16	14	15
		16.257	16.2898	16.1778	16.2857	16.3534	16.3374	16.2653	16.1999	16.3671	16.2224	16.2411	16.2171	16.2194	16.1111	16.1152	16.1331	15.958	16.1127	16.1222	16.1542	CDC42EP1	CDC42EP1	BORG5_HUMAN	Q00587	Q00587	Cdc42 effector protein 1	NA	NA	NA	NA	18	18	18	19	17	19	18	17	17	17	18	17	17	17	17	18	18	18
		14.0389	14.1391	13.8515	14.209	14.1273	14.1073	14.232	14.038	14.057	14.2327	14.2506	14.3734	14.246	14.2161	14.0395	14.3065	14.4137	14.41	14.3121	14.3224	BPHL	BPHL	BPHL_HUMAN	Q86WA6	Q86WA6	Valacyclovir hydrolase	NA	NA	NA	NA	8	7	5	7	7	9	8	8	9	8	10	8	10	10	10	10	9	10
		13.1993	13.0377	12.9531	12.9804	13.0794	12.967	13.2763	13.276	13.0468	13.1566	13.1371	13.2093	13.1046	13.1708	13.1893	13.0547	13.014	13.0631	13.1434	12.9416	HLCS	HLCS	BPL1_HUMAN	P50747	P50747	Biotin--protein ligase	NA	NA	NA	NA	16	16	17	16	15	15	13	15	17	16	15	15	15	14	14	15	15	14
		15.9056	15.861	15.7373	15.8274	15.8528	15.7036	15.8782	15.883	15.792	15.9209	15.8992	16.1181	16.0232	15.9722	15.8672	15.9134	15.8717	15.9651	15.8122	15.7582	BPNT1	BPNT1	BPNT1_HUMAN	O95861	O95861	3'(2'),5'-bisphosphate nucleotidase 1	SASP	NA	down	NA	20	21	21	22	22	22	22	20	22	23	21	21	21	20	21	20	21	21
		12.9667	12.9041	12.8699	12.8908	12.9545	12.9195	12.9605	12.9808	12.886	12.9858	12.8222	12.8756	12.9059	12.8925	12.8636	12.9537	13.0636	12.8734	12.8265	12.8664	BPTF	BPTF	BPTF_HUMAN	Q12830	Q12830	Nucleosome-remodeling factor subunit BPTF	NA	NA	NA	NA	31	33	32	34	31	34	37	36	33	33	31	28	34	30	27	32	25	30
		13.2635	12.8462	13.2134	12.7616	13.144	13.1599	13.4665	13.2652	13.3641	13.2901	13.3171	13.3927	13.4585	13.4668	13.6167	13.2016	13.4321	13.3923	13.5345	13.1559	BRAF.1	BRAF	BRAF_HUMAN	P15056	P15056	Serine/threonine-protein kinase B-raf	NA	NA	NA	NA	5	5	6	5	7	7	9	9	7	9	7	7	7	7	8	6	6	8
		13.8268	13.8668	13.8063	13.5678	13.7459	13.8867	13.8035	13.9324	13.8409	13.9424	13.9152	13.9878	14.0209	14.0696	14.2882	13.9789	14.1631	14.0974	14.2556	14.2443	BRAF	BRAF;RAF1	BRAF_HUMAN;RAF1_HUMAN	P04049;P15056	P15056;P04049	RAF proto-oncogene serine/threonine-protein kinase	NA	NA	NA	NA	1	1	1	1	1	1	1	1	1	1	1	1	1	1	1	1	1	1
		13.0989	12.74	12.6243	12.6927	12.7699	12.9324	12.9604	12.7448	12.6666	12.9545	12.8774	12.9476	12.9145	12.9454	12.7802	12.8736	12.6514	12.8658	12.8737	12.6883	BRAP	BRAP	BRAP_HUMAN	Q7Z569	Q7Z569	BRCA1-associated protein	NA	NA	NA	NA	15	17	18	17	15	18	19	19	17	16	16	15	14	16	14	18	14	15
		12.8838	12.8025	12.7028	12.8465	12.8502	12.883	12.9099	12.6729	12.7818	12.8186	12.9086	12.9367	12.7982	12.7925	12.7377	12.8449	12.6042	12.6718	12.9206	12.7954	BRAT1	BRAT1	BRAT1_HUMAN	Q6PJG6	Q6PJG6	BRCA1-associated ATM activator 1	NA	NA	NA	NA	8	7	9	10	11	9	10	11	11	10	11	9	10	8	9	9	9	9
		14.4106	14.1505	14.1719	14.1168	14.3317	14.2486	14.408	14.3802	14.3434	14.3266	14.4517	14.5326	14.5124	14.4962	14.5186	14.3428	14.4903	14.5027	14.5253	14.4833	BRCC3	BRCC3	BRCC3_HUMAN	P46736	P46736	Lys-63-specific deubiquitinase BRCC36	NA	NA	NA	NA	13	13	14	14	14	14	15	14	15	14	15	15	15	15	14	15	14	14
		13.2053	13.1246	13.0064	13.1144	13.0011	12.9577	12.6034	12.9924	12.9253	13.0577	12.739	12.7351	12.7715	12.8104	12.8971	12.9335	13.0504	12.8277	12.8117	12.8615	BRD1	BRD1	BRD1_HUMAN	O95696	O95696	Bromodomain-containing protein 1	NA	NA	NA	NA	6	6	4	5	5	7	7	5	5	5	7	6	5	5	5	6	3	5
		11.0883	11.206	11.921	12.2446	11.5448	11.7739	11.1703	11.0832	11.9812	11.6121	10.3984	11.3054	11.1517	10.2727	9.92699	11.5296	9.24649	11.5004	11.2376	11.2234	BRD1.1	BRD1;BRPF3	BRD1_HUMAN;BRPF3_HUMAN	O95696;Q9ULD4	O95696;Q9ULD4	Bromodomain-containing protein 1	NA	NA	NA	NA	1	1	1	1	1	1	1	1	1	1	0	1	0	0	0	1	0	1
		13.2101	13.158	13.0889	13.0854	13.1559	13.3233	13.4067	13.2972	13.2949	13.305	13.3546	13.2394	13.1845	13.295	13.1657	13.1913	13.2683	13.16	13.2936	13.2818	BRD2.2	BRD2	BRD2_HUMAN	P25440	P25440	Bromodomain-containing protein 2	NA	NA	NA	NA	16	17	17	16	18	19	18	19	17	18	18	16	17	15	17	19	16	18
		12.6747	11.9228	11.7634	11.9039	12.224	12.2364	12.2108	12.1743	11.9473	12.1998	12.3718	12.4392	12.5828	12.5536	12.4129	12.8221	12.4024	12.5402	13.0762	12.8518	BRD2.3	BRD2;BRD3	BRD2_HUMAN;BRD3_HUMAN	P25440;Q15059	P25440;Q15059	Bromodomain-containing protein 2	NA	NA	NA	NA	1	1	1	1	1	1	1	1	1	1	1	1	1	1	1	1	1	1
		12.4858	12.0234	11.4026	11.828	11.8122	11.8787	12.1344	11.3988	11.3661	11.2455	12.082	11.4795	11.7734	11.5902	11.9829	11.9993	11.9447	12.0199	11.5789	11.9161	BRD2.1	BRD2;BRD3;BRD4	BRD2_HUMAN;BRD3_HUMAN;BRD4_HUMAN	O60885;P25440;Q15059	P25440;Q15059;O60885	Bromodomain-containing protein 4	NA	NA	NA	NA	1	1	1	1	1	1	1	1	1	1	1	1	1	1	1	1	1	1
		11.8621	11.7197	11.0085	11.4527	11.4983	11.3999	11.6326	11.7925	11.848	11.8166	12.2212	12.4014	11.7731	11.6356	11.7255	11.9146	11.7669	11.8321	11.6964	11.592	BRD2	BRD2;BRD4	BRD2_HUMAN;BRD4_HUMAN	O60885;P25440	P25440;O60885	Bromodomain-containing protein 4	NA	NA	NA	NA	2	1	1	2	1	1	2	2	2	1	2	1	1	1	2	2	1	2
		14.297	13.8672	13.7553	13.8201	13.8863	14.0435	14.2021	14.0816	14.0319	14.0719	14.0707	14.0134	14.0159	13.9688	13.9452	14.0276	14.104	14.0346	14.0499	14.0227	BRD3.1	BRD3	BRD3_HUMAN	Q15059	Q15059	Bromodomain-containing protein 3	NA	NA	NA	NA	10	10	10	10	10	10	10	10	9	10	10	10	10	10	10	10	10	10
		14.1101	14.1033	13.9363	13.9685	14.0989	14.1583	14.1972	14.246	14.058	14.1255	14.0417	14.0911	14.1213	14.0008	14.0294	14.3237	14.1036	14.1449	14.2611	14.2574	BRD3	BRD3;BRD4	BRD3_HUMAN;BRD4_HUMAN	O60885;Q15059	Q15059;O60885	Bromodomain-containing protein 4	NA	NA	NA	NA	6	6	6	6	6	6	6	6	6	6	6	6	6	6	6	6	6	6
		14.2419	14.081	14.0203	13.9921	14.0812	14.2268	14.1935	14.1055	14.2041	14.0186	13.8686	13.8614	14.037	13.7524	13.8931	14.0159	13.8119	13.9244	13.97	13.9679	BRD4	BRD4	BRD4_HUMAN	O60885	O60885	Bromodomain-containing protein 4	NA	NA	NA	NA	18	21	22	21	20	21	20	20	20	21	17	17	19	18	15	20	20	20
		11.2672	11.3702	11.167	11.2365	11.3026	11.4408	11.6073	11.4457	11.2836	11.3209	11.4262	11.5756	11.5287	11.6819	11.2818	11.5778	11.21	11.5372	11.4399	11.3573	BRD7	BRD7	BRD7_HUMAN	Q9NPI1	Q9NPI1	Bromodomain-containing protein 7	NA	NA	NA	NA	7	8	5	7	6	6	8	7	8	8	7	7	9	5	7	6	7	9
		13.5277	13.1974	13.0334	13.1481	13.221	13.4225	13.4417	13.1282	13.3378	13.1326	13.2339	13.2037	13.149	13.2556	13.3395	13.214	13.3029	13.3249	13.4807	13.4243	BRD8	BRD8	BRD8_HUMAN	Q9H0E9	Q9H0E9	Bromodomain-containing protein 8	NA	NA	NA	NA	9	9	9	8	8	10	8	8	9	9	9	7	8	8	8	9	7	8
		11.1932	10.1859	11.0001	10.5515	10.3099	10.7548	11.1783	10.6025	10.2479	11.0643	11.2474	11.1469	11.3315	10.9314	11.1983	10.9488	11.4133	11.4608	11.4783	11.7684	BRD9	BRD9	BRD9_HUMAN	Q9H8M2	Q9H8M2	Bromodomain-containing protein 9	NA	NA	NA	NA	1	1	1	1	1	2	2	2	1	1	2	2	2	2	2	2	2	2
		14.1435	14.0191	13.9183	14.0405	14.0259	14.0822	14.1675	14.0463	14.0538	14.0902	13.9779	13.9744	14.0545	13.9592	13.9699	14.0685	14.082	14.0094	14.0072	14.1101	RNF20.1	RNF20	BRE1A_HUMAN	Q5VTR2	Q5VTR2	E3 ubiquitin-protein ligase BRE1A	NA	NA	NA	NA	26	31	33	32	31	33	30	32	30	33	32	27	30	29	29	31	30	29
		14.0304	13.7588	13.2251	13.2398	13.5823	13.737	13.7359	13.5703	13.9108	13.8689	13.6491	13.6661	13.7427	13.7766	13.7998	13.6323	13.7249	13.9518	13.8178	14.0089	RNF20	RNF20;RNF40	BRE1A_HUMAN;BRE1B_HUMAN	O75150;Q5VTR2	Q5VTR2;O75150	E3 ubiquitin-protein ligase BRE1B	NA	NA	NA	NA	5	5	4	4	6	5	5	5	6	5	5	6	5	6	5	6	5	5
		13.8592	13.7673	13.7934	13.7224	13.7975	13.9283	13.9073	13.7335	13.8567	13.8385	13.7889	13.6389	13.7056	13.709	13.7045	13.8138	13.6815	13.6955	13.7727	13.7981	RNF40	RNF40	BRE1B_HUMAN	O75150	O75150	E3 ubiquitin-protein ligase BRE1B	NA	NA	NA	NA	21	21	23	23	22	23	22	22	25	23	24	22	21	22	21	23	21	21
		8.47748	9.1082	8.40731	8.83692	8.41664	8.62672	8.39725	8.46272	10.3742	8.45968	10.5012	9.23361	8.25786	9.48709	9.19009	9.97915	9.91901	9.81431	8.66047	7.9823	BRF2	BRF2	BRF2_HUMAN	Q9HAW0	Q9HAW0	Transcription factor IIIB 50 kDa subunit	NA	NA	NA	NA	1	1	1	1	1	1	1	1	0	1	0	1	1	1	1	0	0	0
		12.0386	11.6409	11.7211	11.2679	11.4146	11.7582	11.9193	11.8091	12.1072	12.1531	12.152	12.2669	11.9021	12.3871	11.4607	12.1347	12.167	12.119	11.4561	11.5103	BRI3	BRI3	BRI3_HUMAN	O95415	O95415	Brain protein I3	NA	NA	NA	NA	1	1	1	1	1	1	1	1	1	1	1	1	1	1	1	1	1	1
		12.5898	13.1887	13.1302	13.2615	13.3949	13.3063	13.3889	13.326	13.1174	12.9076	13.2638	13.3382	12.7227	12.8784	12.9188	13.0373	13.0322	13.0864	13.3637	13.4174	BRI3BP	BRI3BP	BRI3B_HUMAN	Q8WY22	Q8WY22	BRI3-binding protein	NA	NA	NA	NA	2	2	3	2	2	3	2	3	2	3	1	1	1	3	2	2	2	2
		10.5556	11.7146	12.4213	12.383	11.9521	10.7699	11.5691	11.7305	10.4003	11.1476	10.1046	10.4761	10.8915	10.4315	9.35186	10.9614	9.45945	10.1877	9.99493	10.796	BRK1	BRK1	BRK1_HUMAN	Q8WUW1	Q8WUW1	Protein BRICK1	NA	NA	NA	NA	1	1	1	1	1	1	1	1	1	1	1	1	1	1	0	1	0	1
		14.0091	14.0567	14.2804	14.3951	14.0867	14.1365	13.9842	14.1061	13.9627	14.2363	13.8739	13.8504	13.9294	13.8784	13.9098	14.2064	14.0152	13.8801	14.0353	14.1221	BRMS1L	BRMS1L	BRM1L_HUMAN	Q5PSV4	Q5PSV4	Breast cancer metastasis-suppressor 1-like protein	NA	NA	NA	NA	4	5	5	5	4	5	5	5	4	5	5	2	5	4	4	4	5	5
		12.0026	11.649	12.2619	11.6602	12.074	11.9559	12.1927	12.2659	11.9978	11.9927	12.2803	12.3131	12.1039	11.8741	12.1551	11.7425	12.0079	11.6475	11.9896	11.429	BRME1	BRME1	BRME1_HUMAN	Q0VDD7	Q0VDD7	Break repair meiotic recombinase recruitment factor 1	NA	NA	NA	NA	2	2	2	2	2	2	2	2	2	2	2	2	2	2	2	1	1	1
		11.0365	10.8959	10.0042	10.8794	10.7	11.0838	10.9102	11.0359	10.9644	10.5883	10.4979	9.41432	10.9293	11.3468	10.8979	11.367	11.2804	11.1763	10.9298	10.8147	BRMS1	BRMS1	BRMS1_HUMAN	Q9HCU9	Q9HCU9	Breast cancer metastasis-suppressor 1	NA	NA	NA	NA	1	2	0	2	1	2	2	2	1	1	2	0	1	2	1	1	2	1
		16.4917	16.6902	16.2427	16.5126	16.4441	16.4952	16.6909	16.6318	16.6548	16.7589	16.425	16.6131	16.5386	16.6062	16.5526	16.563	16.5051	16.5677	16.5055	16.4922	BROX	BROX	BROX_HUMAN	Q5VW32	Q5VW32	BRO1 domain-containing protein BROX	NA	NA	NA	NA	12	13	13	11	12	13	13	13	13	14	14	14	14	11	12	13	12	13
		12.8239	12.3576	13.0179	12.5748	12.7116	12.8478	12.5051	12.5055	11.9743	12.1439	12.0229	11.499	12.2726	12.3106	12.7111	12.7441	12.0159	12.0922	12.2515	12.9825	BRWD1	BRWD1;PHIP	BRWD1_HUMAN;PHIP_HUMAN	Q8WWQ0;Q9NSI6	Q9NSI6;Q8WWQ0	PH-interacting protein	NA	NA	NA	NA	2	2	2	2	2	2	2	2	2	2	1	1	2	2	2	2	1	2
		16.2771	16.3552	16.1005	16.0764	16.2454	16.2457	16.3731	16.257	16.233	16.303	16.255	16.3194	16.2524	16.3209	16.242	16.3308	16.1598	16.1744	16.21	16.2333	BRIX1	BRIX1	BRX1_HUMAN	Q8TDN6	Q8TDN6	Ribosome biogenesis protein BRX1 homolog	NA	NA	NA	NA	30	32	32	32	32	34	33	34	33	33	33	32	29	35	30	32	32	33
		12.2083	12.3446	12.5004	12.3479	12.9124	12.3178	12.3372	12.2447	11.7717	12.219	12.1856	12.0767	11.9174	12.218	12.1621	12.4699	12.8018	12.4159	12.1629	12.4348	BSCL2	BSCL2	BSCL2_HUMAN	Q96G97	Q96G97	Seipin	NA	NA	NA	NA	4	6	5	5	4	6	5	6	6	6	5	5	5	6	5	6	3	5
		13.2097	13.058	12.7003	12.7678	12.9537	13.2728	13.0885	12.8896	13.0979	12.9486	13.2503	12.991	13.2726	13.087	13.1996	13.1706	12.7607	12.9965	13.0294	13.2238	BSDC1	BSDC1	BSDC1_HUMAN	Q9NW68	Q9NW68	BSD domain-containing protein 1	NA	NA	NA	NA	8	9	8	9	6	8	9	8	8	9	8	8	9	9	9	7	8	9
		14.2546	14.1838	14.4672	14.1922	14.3463	14.3741	14.0623	14.2698	14.4035	14.3242	14.312	14.3573	14.2349	14.1353	14.1849	14.2751	14.2138	14.4249	14.1697	14.1136	BST1	BST1	BST1_HUMAN	Q10588	Q10588	ADP-ribosyl cyclase/cyclic ADP-ribose hydrolase 2	NA	NA	NA	NA	9	10	11	10	10	8	9	9	8	10	9	8	9	10	7	9	9	8
		12.0968	12.1671	11.967	11.8761	12.0005	11.9592	12.1636	12.0399	11.9699	12.1623	12.1203	12.161	12.1958	12.2393	12.2304	12.1672	12.0133	12.1389	12.1184	12.1328	BTN2A1	BTN2A1	BT2A1_HUMAN	Q7KYR7	Q7KYR7	Butyrophilin subfamily 2 member A1	NA	NA	NA	NA	8	10	9	10	10	10	9	10	11	11	8	10	8	10	7	10	10	10
		11.7614	11.4488	11.4792	11.6439	11.4762	11.4316	11.5441	11.6457	11.6808	11.6126	11.2084	11.5406	11.2788	11.4791	11.1059	11.3477	11.4605	11.3913	11.1454	11.6478	BTN3A1.2	BTN3A1	BT3A1_HUMAN	O00481	O00481	Butyrophilin subfamily 3 member A1	NA	NA	NA	NA	7	7	6	6	8	6	5	5	6	6	5	5	4	6	3	5	5	4
		11.7777	11.8431	12.2375	12.4727	12.1924	11.9244	12.0544	12.136	12.1475	12.0877	11.8398	11.7638	11.9951	11.8153	10.2327	12.238	12.07	10.8853	11.8399	11.9027	BTN3A1	BTN3A1;BTN3A2;BTN3A3	BT3A1_HUMAN;BT3A2_HUMAN;BT3A3_HUMAN	O00478;O00481;P78410	O00481;P78410;O00478	Butyrophilin subfamily 3 member A3	NA	NA	NA	NA	2	3	3	3	3	3	3	3	3	1	2	2	1	2	0	3	2	0
		11.1386	10.5589	10.3057	10.8172	11.0469	11.2779	11.3948	10.9346	11.3712	10.0187	11.15	11.594	11.7607	11.6071	11.1572	11.5416	11.3641	11.456	12.0133	11.7123	BTN3A1.1	BTN3A1;BTN3A3;TRIM11;TRIM68	BT3A1_HUMAN;BT3A3_HUMAN;TRI11_HUMAN;TRI68_HUMAN	O00478;O00481;Q6AZZ1;Q96F44	Q13410;O00481;O00478;Q96F44;Q6AZZ1	Butyrophilin subfamily 3 member A3	NA	NA	NA	NA	1	1	1	1	1	1	1	1	1	0	1	1	1	1	1	1	1	1
		14.619	14.9516	14.8728	14.6311	14.9151	14.768	15.0082	14.9517	14.787	14.8016	14.1231	14.4288	14.3585	14.2444	14.2869	14.4087	14.1754	14.2198	14.4744	14.454	BTN3A2.1	BTN3A2	BT3A2_HUMAN	P78410	P78410	Butyrophilin subfamily 3 member A2	NA	NA	NA	NA	3	5	4	5	4	5	4	4	5	4	3	4	4	3	3	3	2	4
		10.5521	9.99678	8.52183	8.88054	10.3173	9.87471	10.5359	9.26068	10.6353	10.4045	11.3608	10.8268	9.4339	10.664	9.65016	10.4875	11.1639	10.7817	10.684	11.4798	BTN3A2	BTN3A2;BTN3A3	BT3A2_HUMAN;BT3A3_HUMAN	O00478;P78410	P78410;O00478	Butyrophilin subfamily 3 member A3	NA	NA	NA	NA	1	1	1	1	1	1	1	1	1	1	1	1	1	1	0	1	1	1
		12.838	13.0589	13.2236	13.1387	12.9579	13.1614	13.153	13.0365	13.0277	13.0541	12.7371	12.9293	12.6717	12.8828	12.4962	13.1253	12.7594	12.9653	12.7311	12.5608	BTN3A3	BTN3A3	BT3A3_HUMAN	O00478	O00478	Butyrophilin subfamily 3 member A3	NA	NA	NA	NA	10	8	7	7	8	11	7	7	9	8	6	9	8	8	6	8	7	8
		15.1538	15.0318	15.0854	15.1241	15.1553	15.133	15.1593	15.195	15.4022	15.2808	15.3646	15.3422	15.355	15.2747	15.4098	15.2679	15.4039	15.2964	15.2947	15.3646	BTF3L4	BTF3L4	BT3L4_HUMAN	Q96K17	Q96K17	Transcription factor BTF3 homolog 4	NA	NA	NA	NA	20	20	20	18	20	19	20	21	22	20	22	20	22	20	20	21	21	20
		9.31136	10.2969	9.52383	10.1294	10.185	10.5125	9.68202	9.33879	9.73262	10.3984	8.79931	8.70824	9.60422	9.01714	8.79217	9.71261	8.64281	8.78955	9.13014	10.6126	BTF3.1	BTF3;BTF3L4	BT3L4_HUMAN;BTF3_HUMAN	P20290;Q96K17	Q96K17;P20290	Transcription factor BTF3	NA	NA	NA	NA	1	1	1	1	1	1	1	1	0	1	1	1	1	1	1	1	1	0
		14.0145	13.8513	13.6772	13.7283	13.7349	13.7912	13.8809	13.8751	13.7468	13.8227	13.837	13.844	13.8955	13.8712	13.8266	13.8473	13.8235	13.8065	13.8558	13.9482	BTAF1	BTAF1	BTAF1_HUMAN	O14981	O14981	TATA-binding protein-associated factor 172	NA	NA	NA	NA	34	33	34	33	34	35	33	36	35	32	32	29	29	29	28	31	25	30
		12.604	12.7074	12.667	12.8116	13.0441	12.6893	12.8489	12.5351	13.0002	12.8648	12.7629	12.636	12.6045	12.6939	12.4802	12.8807	12.5503	12.7183	12.6546	12.6218	BTBD2	BTBD2	BTBD2_HUMAN	Q9BX70	Q9BX70	BTB/POZ domain-containing protein 2	NA	NA	NA	NA	3	4	4	4	4	4	2	4	4	4	3	3	3	3	3	4	3	3
		12.4503	12.0189	12.0636	11.9478	12.0312	12.0241	12.2758	12.0543	12.0085	12.23	12.3395	12.272	12.0383	12.1795	12.1777	12.2194	12.0442	12.0504	12.2113	12.2242	BTBD9	BTBD9	BTBD9_HUMAN	Q96Q07	Q96Q07	BTB/POZ domain-containing protein 9	NA	NA	NA	NA	5	6	6	5	7	6	6	7	6	6	5	6	6	4	4	5	5	4
		11.6241	11.6057	11.9238	11.4401	11.6976	11.6357	11.7228	11.943	11.8942	12.0313	12.2369	11.6593	11.8483	11.8322	11.8932	11.7925	11.3645	11.5315	12.0055	11.6853	BTBD10	BTBD10	BTBDA_HUMAN	Q9BSF8	Q9BSF8	BTB/POZ domain-containing protein 10	NA	NA	NA	NA	2	3	2	2	3	2	3	3	3	3	2	3	2	2	2	2	1	2
		12.8372	12.8182	13.09	13.0561	13.0578	12.9457	12.8442	12.931	12.9325	12.9399	12.9222	12.9911	12.9692	12.9091	12.7771	13.0559	12.8642	12.7024	12.8542	12.8644	BTD	BTD	BTD_HUMAN	P43251	P43251	Biotinidase	SASP	NA	altered	NA	6	7	7	6	5	6	6	6	6	6	6	5	6	6	5	6	6	6
		15.9864	16.0301	15.8687	15.9616	15.7379	16.0938	16.1004	15.7788	16.0455	16.1033	15.9802	15.8858	15.7837	15.9462	15.8669	15.8638	15.9523	15.7895	15.9649	15.8618	BTF3	BTF3	BTF3_HUMAN	P20290	P20290	Transcription factor BTF3	NA	NA	NA	NA	12	12	12	12	10	11	12	11	13	13	11	12	11	11	10	12	11	12
		12.132	12.3429	12.7935	12.0865	12.3762	11.873	12.2062	12.1982	12.3357	12.1282	12.3331	12.3423	12.1493	12.0163	11.9693	12.0667	12.2476	12.385	12.3461	12.4184	BTG3	BTG3	BTG3_HUMAN	Q14201	Q14201	Protein BTG3	NA	NA	NA	NA	3	2	1	3	2	2	3	3	3	3	2	2	3	2	2	3	3	3
		14.6926	14.6356	15.0109	14.8403	14.985	14.643	14.5812	14.7662	14.9041	14.5733	14.2545	14.5537	14.5867	14.7252	14.4451	14.5905	14.5283	14.3234	10.8268	14.7651	BTK	BTK;EPHA2;EPHB2;EPHB3;EPHB4	BTK_HUMAN;EPHA2_HUMAN;EPHB2_HUMAN;EPHB3_HUMAN;EPHB4_HUMAN	P29317;P29323;P54753;P54760;Q06187	Q06187;P29317;P29320;P54756;Q9UF33;Q15375;P29322;P54762;P29323;P54753;P54760	Ephrin type-A receptor 2	SASP	NA	down;up	NA	1	1	1	1	1	1	1	1	1	1	1	1	1	1	1	1	1	1
		17.4352	17.5353	17.4625	17.4749	17.4627	17.497	17.5714	17.6154	17.6162	17.6893	17.3062	17.4413	17.4249	17.3098	17.2473	17.3762	17.332	17.381	17.3427	17.4153	BUB3	BUB3	BUB3_HUMAN	O43684	O43684	Mitotic checkpoint protein BUB3	NA	NA	NA	NA	21	22	22	21	22	21	20	21	21	21	22	22	22	22	22	21	21	22
		12.4715	12.7229	12.5776	12.6495	12.7336	12.702	12.5089	12.6186	12.5778	12.6908	12.4921	12.4461	12.5025	12.1356	12.1898	12.4217	12.3289	12.5314	12.2594	12.2024	BUD13	BUD13	BUD13_HUMAN	Q9BRD0	Q9BRD0	BUD13 homolog	NA	NA	NA	NA	8	8	9	8	8	10	9	10	10	8	7	7	7	7	7	8	9	8
		13.6535	13.2646	12.9841	13.1445	12.8463	12.7942	13.0885	12.8993	12.9025	12.4421	12.7104	12.797	12.824	12.5147	13.0864	12.7902	12.7961	12.5224	12.8679	12.6596	BUD23	BUD23	BUD23_HUMAN	O43709	O43709	Probable 18S rRNA (guanine-N(7))-methyltransferase	NA	NA	NA	NA	1	2	2	3	2	2	2	2	2	2	2	1	2	2	1	1	2	3
		13.8834	14.119	14.1986	14.1319	14.2256	14.1622	13.9366	14.2409	14.0593	14.2654	13.8119	13.9845	14.0788	13.8213	13.7343	13.8129	13.8973	13.9023	13.7108	13.9155	BUD31	BUD31	BUD31_HUMAN	P41223	P41223	Protein BUD31 homolog	NA	NA	NA	NA	5	6	6	6	6	6	6	6	6	6	5	6	6	6	6	6	5	6
		15.0702	14.9902	15.0238	14.9899	14.8882	14.8934	14.9869	15.03	15.0852	15.0807	15.1351	15.1772	15.0563	14.9645	15.0436	15.0581	14.9217	15.0757	15.027	15.0774	BYSL	BYSL	BYST_HUMAN	Q13895	Q13895	Bystin	NA	NA	NA	NA	19	20	19	22	21	20	20	22	20	21	19	21	22	21	20	20	20	21
		16.705	16.8403	16.7379	16.7313	16.743	16.7722	16.7545	16.7475	16.8796	17.0506	16.712	16.805	16.8101	16.6372	16.6691	16.8589	16.6519	16.7518	16.6942	16.743	BZW1	BZW1	BZW1_HUMAN	Q7L1Q6	Q7L1Q6	Basic leucine zipper and W2 domain-containing protein 1	NA	NA	NA	NA	23	25	23	25	24	24	27	26	24	26	21	26	24	24	25	23	24	25
		18.1203	18.1452	18.0036	18.1205	17.7489	18.0878	17.9593	18.1098	18.3812	18.1261	17.9006	17.8989	17.9728	17.9728	17.7383	18.1742	18.3801	18.244	18.3478	18.3591	BZW1.1	BZW1;BZW2	BZW1_HUMAN;BZW2_HUMAN	Q7L1Q6;Q9Y6E2	Q7L1Q6;Q9Y6E2	Basic leucine zipper and W2 domain-containing protein 1	NA	NA	NA	NA	2	2	2	2	2	2	2	2	2	2	2	2	2	2	2	2	2	2
		16.798	16.8735	16.9335	17.0026	16.9388	16.9142	16.8995	16.8951	16.9199	16.8855	16.6022	16.5479	16.6008	16.5134	16.3756	16.7262	16.4887	16.5322	16.5103	16.6036	BZW2	BZW2	BZW2_HUMAN	Q9Y6E2	Q9Y6E2	Basic leucine zipper and W2 domain-containing protein 2	NA	NA	NA	NA	22	20	17	21	22	21	22	22	23	22	19	21	23	20	17	21	21	21
		13.4023	13.1256	13.1726	13.0801	13.3351	13.3734	13.2174	13.3591	13.4937	13.1775	13.1812	13.1666	13.2285	13.2939	13.2914	13.4966	13.3931	13.3092	13.237	13.366	CCDC102A	CCDC102A	C102A_HUMAN	Q96A19	Q96A19	Coiled-coil domain-containing protein 102A	NA	NA	NA	NA	12	12	11	11	13	15	15	11	12	13	14	14	14	12	11	14	13	15
		13.7005	13.4558	13.4547	13.4909	13.4381	13.5698	13.542	13.4786	13.4659	13.4378	13.7473	13.597	13.764	13.5931	13.6101	13.6848	13.5311	13.5224	13.7382	13.62	CEP170B	CEP170B	C170B_HUMAN	Q9Y4F5	Q9Y4F5	Centrosomal protein of 170 kDa protein B	NA	NA	NA	NA	20	25	23	26	27	29	26	24	27	25	26	26	27	27	26	29	24	27
		12.2348	13.006	13.3094	13.712	12.8711	13.1435	12.6173	13.0871	13.2189	13.4889	12.2616	12.0709	12.7549	12.0714	11.6089	12.8459	11.2125	12.1096	12.0559	12.9109	CEP170.1	CEP170;CEP170B	C170B_HUMAN;CE170_HUMAN	Q5SW79;Q9Y4F5	Q9Y4F5;Q5SW79	Centrosomal protein of 170 kDa	NA	NA	NA	NA	1	1	1	1	1	1	1	1	1	1	1	1	1	1	1	1	0	1
		14.5658	14.5904	14.4731	14.3565	14.5683	14.548	14.6407	14.6736	14.5888	14.6046	14.5285	14.5138	14.6055	14.373	14.5425	14.5803	14.7361	14.637	14.566	14.41	CWF19L1	CWF19L1	C19L1_HUMAN	Q69YN2	Q69YN2	CWF19-like protein 1	NA	NA	NA	NA	13	12	13	12	14	14	13	14	15	14	12	12	12	12	11	13	10	11
		12.2245	12.6788	12.3892	12.4792	12.2952	12.652	12.3791	12.4479	12.5295	12.5543	12.6673	12.6908	12.5071	12.5636	12.4985	12.6884	12.7162	12.5554	12.7928	12.6894	CWF19L2	CWF19L2	C19L2_HUMAN	Q2TBE0	Q2TBE0	CWF19-like protein 2	NA	NA	NA	NA	4	4	4	5	4	4	4	4	5	5	5	5	4	4	3	4	5	4
		13.5258	13.5015	13.153	13.4319	13.3461	13.7542	13.1493	13.5858	13.5926	13.5865	13.1764	13.2986	13.286	13.5618	12.9588	13.3688	13.2405	13.1274	12.9604	13.2658	C1D	C1D	C1D_HUMAN	Q13901	Q13901	Nuclear nucleic acid-binding protein C1D	NA	NA	NA	NA	2	2	2	2	2	2	2	2	2	2	2	2	2	2	2	2	2	2
		13.3853	13.4738	13.3434	13.2551	13.2711	13.2627	13.5147	13.547	13.3144	13.4392	13.3022	13.2759	13.3305	13.1635	13.3395	13.1438	13.1199	13.2148	13.1541	13.2339	C1GALT1C1	C1GALT1C1	C1GLC_HUMAN	Q96EU7	Q96EU7	C1GALT1-specific chaperone 1	NA	NA	NA	NA	8	6	6	6	8	8	7	8	8	8	6	6	8	7	7	7	6	7
		16.2055	16.1467	15.84	16.1928	15.9459	15.9364	16.1302	16.0624	15.8153	16.0571	16.0336	16.2576	16.1806	16.2645	16.1285	16.3026	15.9638	15.9403	15.9975	16.042	C1GALT1	C1GALT1	C1GLT_HUMAN	Q9NS00	Q9NS00	Glycoprotein-N-acetylgalactosamine 3-beta-galactosyltransferase 1	NA	NA	NA	NA	8	11	9	8	10	12	11	11	12	10	12	11	11	11	8	10	10	11
		19.3641	19.2739	19.3182	19.2707	19.3437	19.3189	19.4923	19.3443	19.4084	19.4422	19.2393	19.1723	19.1272	19.2538	19.1604	19.2735	19.1619	19.2207	19.2376	19.1922	C1QBP	C1QBP	C1QBP_HUMAN	Q07021	Q07021	Complement component 1 Q subcomponent-binding protein, mitochondrial	SASP	NA	down	NA	10	10	10	10	10	10	10	10	10	10	10	10	10	10	9	10	10	10
		12.1287	12.0886	12.0921	12.4292	12.4941	12.0276	11.9401	12.3527	12.2013	12.2019	12.3719	12.0515	12.2521	11.7802	11.9088	12.3042	12.4902	12.1579	12.2601	12.2515	C1QTNF1	C1QTNF1	C1QT1_HUMAN	Q9BXJ1	Q9BXJ1	Complement C1q tumor necrosis factor-related protein 1	NA	NA	NA	NA	2	1	2	3	2	2	3	2	2	2	2	2	2	2	1	2	1	2
		12.5383	12.477	12.45	12.4487	12.6538	12.7358	12.3702	12.4025	12.9629	12.5796	12.3763	12.4301	12.5483	12.7419	12.6592	12.7351	12.7303	12.9612	12.6	12.8965	C1QTNF5	C1QTNF5	C1QT5_HUMAN	Q9BXJ0	Q9BXJ0	Complement C1q tumor necrosis factor-related protein 5	NA	NA	NA	NA	3	3	3	3	3	2	3	3	2	3	2	1	2	2	2	3	3	3
		14.0281	13.9792	13.9785	13.7903	14.0202	14.0914	14.0296	14.0485	14.0054	13.9602	13.5098	13.8795	13.7293	13.5849	13.5889	13.8736	13.8538	13.8095	13.8078	13.895	C1R	C1R	C1R_HUMAN	P00736	P00736	Complement C1r subcomponent	SASP	NA	altered	NA	18	18	18	15	19	19	18	19	19	20	19	17	19	16	16	18	16	17
		13.385	13.2275	13.2008	13.2107	13.1584	13.2032	13.0988	13.4124	13.3269	13.3718	12.5338	12.751	12.6216	12.5184	12.5497	12.8594	12.5227	12.5775	12.4451	12.7395	C1RL	C1RL	C1RL_HUMAN	Q9NZP8	Q9NZP8	Complement C1r subcomponent-like protein	SASP	NA	altered	NA	4	5	4	4	4	3	2	3	3	3	4	2	2	2	2	3	2	4
		14.3487	14.0226	14.0296	14.1261	14.1502	14.1515	14.2314	14.2468	14.0531	14.1132	14.2243	14.011	14.0966	14.1064	14.001	14.3474	14.1462	14.1438	14.2011	14.2627	C1S	C1S	C1S_HUMAN	P09871	P09871	Complement C1s subcomponent	SASP	NA	altered	NA	18	19	20	20	18	18	20	17	19	18	17	17	18	15	18	17	18	16
		13.4116	13.6479	13.8962	14.1585	13.7769	13.8723	14.0237	13.9644	13.7522	13.8439	13.8698	13.7039	13.7502	13.362	13.4234	13.8462	13.411	13.4891	13.584	13.6036	C1S.1	C1S;MASP1	C1S_HUMAN;MASP1_HUMAN	P09871;P48740	P09871;P48740	Complement C1s subcomponent	SASP	NA	altered;up	NA	1	1	1	1	1	1	1	1	1	1	1	1	1	1	1	1	1	1
		12.8109	12.4341	12.5332	9.77909	12.8499	12.6526	12.5683	10.41	11.0496	12.7804	12.3422	12.5928	10.8813	11.3633	11.6358	11.0145	9.869	12.6724	8.5719	9.67369	C1QTNF9	C1QTNF9;C1QTNF9B	C1T9A_HUMAN;C1T9B_HUMAN	B2RNN3;P0C862	P0C862;B2RNN3	Complement C1q and tumor necrosis factor-related protein 9B	NA	NA	NA	NA	1	1	1	0	1	1	1	0	0	1	1	1	0	0	1	0	0	1
		17.5232	17.5928	17.5617	17.5759	17.5793	17.5709	17.5989	17.5646	17.6376	17.6394	17.2472	17.2897	17.3304	17.2611	17.2208	17.3323	17.2232	17.3009	17.2946	17.3302	MTHFD1	MTHFD1	C1TC_HUMAN	P11586	P11586	C-1-tetrahydrofolate synthase, cytoplasmic	NA	NA	NA	NA	68	69	69	72	71	71	70	72	71	72	65	67	69	64	64	66	64	68
		16.3182	16.626	16.6878	17.0014	16.67	16.6725	16.5981	16.7037	16.538	16.5667	15.7764	16.1955	16.2211	15.4597	16.0232	16.3776	15.7453	15.8283	15.6037	16.1265	MTHFD1.1	MTHFD1;MTHFD1L	C1TC_HUMAN;C1TM_HUMAN	P11586;Q6UB35	P11586;Q6UB35	C-1-tetrahydrofolate synthase, cytoplasmic	NA	NA	NA	NA	1	1	1	1	1	1	1	1	1	1	1	1	1	1	1	1	1	1
		16.2393	16.2417	16.2701	16.2752	16.3866	16.2854	16.2777	16.2813	16.3017	16.3644	16.5857	16.6406	16.5859	16.493	16.5145	16.4684	16.4162	16.4335	16.4126	16.4079	MTHFD1L	MTHFD1L	C1TM_HUMAN	Q6UB35	Q6UB35	Monofunctional C1-tetrahydrofolate synthase, mitochondrial	NA	NA	NA	NA	42	40	44	45	43	45	42	44	45	44	44	43	44	44	44	45	40	45
		11.2593	11.345	11.0849	11.4633	11.3925	11.3789	11.4384	11.5994	11.2444	11.0759	11.5149	11.6792	11.2948	11.9024	11.7411	11.6109	11.525	11.4117	11.4699	11.538	C2CD2L	C2CD2L	C2C2L_HUMAN	O14523	O14523	Phospholipid transfer protein C2CD2L	NA	NA	NA	NA	3	4	5	5	5	7	7	3	4	4	6	3	4	4	4	5	4	5
		12.068	11.9086	11.7191	11.8063	11.9877	11.8218	12.1405	11.981	11.7442	11.9684	11.8651	11.6867	11.7569	11.834	11.7574	11.6059	11.7484	11.6894	11.7571	11.7113	C2CD2	C2CD2	C2CD2_HUMAN	Q9Y426	Q9Y426	C2 domain-containing protein 2	NA	NA	NA	NA	3	4	3	5	4	4	5	4	6	6	5	5	6	5	5	4	6	6
		9.86827	9.7625	9.98312	10.1243	10.3515	10.202	9.71704	10.4877	10.4061	10.3815	10.3074	9.72434	10.4959	11.2031	10.0146	10.3512	10.0123	10.0174	10.4887	10.9705	C2CD3	C2CD3	C2CD3_HUMAN	Q4AC94	Q4AC94	C2 domain-containing protein 3	NA	NA	NA	NA	3	2	2	1	2	3	1	2	2	1	1	2	2	0	1	3	0	2
		13.864	14.0063	14.013	13.9886	14.038	14.0443	13.97	14.0187	14.0305	13.9967	13.9584	13.9617	13.9346	13.9319	13.8935	14.0793	13.9644	13.8933	13.7216	13.9088	C2CD5	C2CD5	C2CD5_HUMAN	Q86YS7	Q86YS7	C2 domain-containing protein 5	NA	NA	NA	NA	16	17	17	18	18	16	17	18	18	17	16	17	17	17	18	17	17	17
		14.1015	14.0913	13.976	14.19	14.163	14.2713	14.0955	14.0441	14.3141	14.1252	14.1371	14.0009	14.1942	13.9863	13.9692	14.0995	13.8247	13.973	13.9452	13.9082	CC2D1A	CC2D1A	C2D1A_HUMAN	Q6P1N0	Q6P1N0	Coiled-coil and C2 domain-containing protein 1A	NA	NA	NA	NA	26	28	30	30	25	29	28	30	31	29	27	26	30	26	25	30	29	29
		14.0568	13.8621	13.7498	14.0406	13.8959	13.9602	13.9937	13.8469	13.7824	13.7388	13.8027	13.8346	13.8469	13.8089	13.8331	13.8097	13.7187	13.7705	13.8406	13.8675	CC2D1B	CC2D1B	C2D1B_HUMAN	Q5T0F9	Q5T0F9	Coiled-coil and C2 domain-containing protein 1B	SASP	NA	up	NA	20	21	18	21	21	21	21	21	21	20	18	21	21	17	19	20	17	19
		11.9915	11.8209	11.698	11.7178	11.9661	12.0235	12.3471	12.0588	12.0359	11.9051	12.1721	12.0026	12.1715	11.9517	11.9955	12.0038	12.0169	12.1406	11.9574	11.9489	CC2D2A	CC2D2A	C2D2A_HUMAN	Q9P2K1	Q9P2K1	Coiled-coil and C2 domain-containing protein 2A	NA	NA	NA	NA	8	8	6	8	7	9	6	7	9	6	7	5	7	8	7	8	8	7
		12.1212	12.1345	12.1119	12.1812	12.0312	12.1305	11.8078	12.0748	12.118	11.8736	11.4481	10.9201	12.0429	11.3448	11.4989	11.7157	11.4154	10.8666	11.6702	11.3732	CDC42SE2	CDC42SE2	C42S2_HUMAN	Q9NRR3	Q9NRR3	CDC42 small effector protein 2	NA	NA	NA	NA	1	2	2	2	2	2	2	2	2	2	2	1	2	1	2	2	2	2
		15.9672	15.6446	15.4978	15.3763	15.3134	15.8723	15.6758	15.4467	15.5513	15.3631	15.6963	15.8945	15.6536	15.7175	15.9357	15.53	15.6955	15.7637	16.0377	15.7642	SDHC	SDHC	C560_HUMAN	Q99643	Q99643	Succinate dehydrogenase cytochrome b560 subunit, mitochondrial	NA	NA	NA	NA	7	7	7	6	6	6	6	6	6	6	5	6	6	6	6	6	5	5
		14.6416	14.2758	14.3201	14.199	14.5561	14.4175	14.513	14.4087	14.468	14.5043	14.8184	14.4475	14.5247	14.478	14.2653	14.0833	13.6546	13.4108	12.9205	12.9842	CYB561D2	CYB561D2	C56D2_HUMAN	O14569	O14569	Cytochrome b561 domain-containing protein 2	NA	NA	NA	NA	3	3	3	3	3	3	3	3	3	3	3	3	3	3	3	3	3	3
		12.6884	12.7058	12.8415	12.7943	12.5558	12.7983	13.045	12.839	12.8252	12.5047	12.9956	13.202	12.9395	13.0478	12.9951	12.6862	12.7281	13.0435	12.7698	12.7477	CD99L2	CD99L2	C99L2_HUMAN	Q8TCZ2	Q8TCZ2	CD99 antigen-like protein 2	NA	NA	NA	NA	4	4	4	4	4	4	4	4	4	4	4	4	4	4	4	4	4	4
		13.097	13.2567	13.2581	13.3091	13.3794	13.4734	13.2937	13.3817	13.3045	13.1096	12.6897	12.6907	12.6818	12.4868	12.4689	12.5807	12.4512	12.7049	12.3753	12.47	C1orf21	C1orf21	CA021_HUMAN	Q9H246	Q9H246	Uncharacterized protein C1orf21	NA	NA	NA	NA	6	6	6	6	6	6	5	6	5	5	6	6	5	4	6	6	5	5
		11.9563	11.9866	11.7947	12.2927	12.1215	11.845	11.8899	11.751	12.0935	11.8936	11.8591	11.88	11.9451	11.921	11.9928	11.8333	11.7066	11.7457	11.6486	11.808	C1orf43	C1orf43	CA043_HUMAN	Q9BWL3	Q9BWL3	Protein C1orf43	NA	NA	NA	NA	4	4	4	3	3	4	4	4	4	4	3	3	3	4	3	3	4	3
		11.8026	11.4679	11.5154	11.2781	11.1752	11.3859	11.6529	11.5084	11.4136	11.2913	11.4217	11.7484	11.7774	11.7628	11.6492	11.0476	11.6326	11.7663	11.573	11.6761	C1orf50	C1orf50	CA050_HUMAN	Q9BV19	Q9BV19	Uncharacterized protein C1orf50	NA	NA	NA	NA	5	6	5	6	6	5	6	5	6	5	5	5	6	6	4	4	5	6
		14.9102	15.1112	14.8823	15.2461	14.7991	14.9857	14.761	15.2541	15.0166	14.9518	14.4785	14.6946	14.7446	14.5203	14.1896	14.501	14.4234	14.3611	14.2093	14.4116	C1orf52	C1orf52	CA052_HUMAN	Q8N6N3	Q8N6N3	UPF0690 protein C1orf52	NA	NA	NA	NA	3	3	2	2	2	2	3	3	3	3	3	3	3	3	3	3	3	3
		11.7663	12.1141	12.4095	12.1361	11.9862	12.2109	12.0782	12.0626	12.2866	12.4109	12.246	11.8863	11.9974	11.9819	11.7582	11.9561	11.6614	11.5404	11.9328	11.891	C1orf131	C1orf131	CA131_HUMAN	Q8NDD1	Q8NDD1	Uncharacterized protein C1orf131	NA	NA	NA	NA	1	2	2	2	2	2	2	2	2	2	1	2	2	2	1	2	1	2
		13.9236	13.6667	13.9022	13.7785	13.5753	13.7931	13.5953	13.8733	13.9188	13.797	13.2868	13.7306	13.6188	13.314	13.4611	13.6962	13.2126	13.6474	13.4475	13.7854	C1orf174	C1orf174	CA174_HUMAN	Q8IYL3	Q8IYL3	UPF0688 protein C1orf174	NA	NA	NA	NA	3	5	4	4	4	5	5	4	4	5	4	5	5	5	5	3	4	5
		14.3718	14.4433	14.3824	14.5012	14.4493	14.4178	14.3129	14.3566	14.553	14.3669	14.2718	14.2684	14.4024	14.4196	14.3104	14.3901	14.2464	14.276	14.1395	14.2117	C1orf198	C1orf198	CA198_HUMAN	Q9H425	Q9H425	Uncharacterized protein C1orf198	NA	NA	NA	NA	19	20	19	18	19	19	19	18	18	19	19	17	20	18	19	20	17	19
		15.0503	15.1272	15.183	15.2819	15.2286	14.9708	15.1129	15.1193	15.1415	15.1539	15.1186	15.277	15.2631	15.2503	15.2114	15.2686	15.0494	15.0755	14.9843	15.1094	CACNA2D1	CACNA2D1	CA2D1_HUMAN	P54289	P54289	Voltage-dependent calcium channel subunit alpha-2/delta-1	NA	NA	NA	NA	43	44	43	46	46	45	41	43	46	45	45	43	42	42	42	41	42	44
		15.241	15.2212	15.5291	15.6409	15.5389	15.3241	15.3071	15.4992	15.5148	15.6023	15.4109	15.7465	15.6811	15.6634	15.6735	15.6036	15.7024	15.3476	15.5262	15.6276	CACNA2D1.1	CACNA2D1;CACNA2D2	CA2D1_HUMAN;CA2D2_HUMAN	P54289;Q9NY47	P54289;Q9NY47	Voltage-dependent calcium channel subunit alpha-2/delta-1	NA	NA	NA	NA	2	2	2	2	2	2	2	2	2	2	2	2	2	2	2	2	2	2
		12.7335	12.9661	12.7538	12.9962	12.978	13.0173	13.0381	12.836	13.1511	12.9375	12.9083	12.7879	12.8872	12.6472	12.8714	12.9488	12.8299	12.7082	12.7742	12.9799	CAAP1	CAAP1	CAAP1_HUMAN	Q9H8G2	Q9H8G2	Caspase activity and apoptosis inhibitor 1	NA	NA	NA	NA	5	4	3	3	3	4	5	5	3	4	4	2	4	4	4	5	4	4
		16.4777	16.3189	16.2489	16.3391	16.3977	16.4304	16.4203	16.3376	16.4235	16.3811	16.3887	16.3782	16.4052	16.3939	16.3759	16.351	16.394	16.2898	16.4257	16.3974	CAB39.1	CAB39	CAB39_HUMAN	Q9Y376	Q9Y376	Calcium-binding protein 39	SASP	NA	up	NA	20	21	23	19	22	22	20	22	23	23	23	20	22	22	19	21	20	19
		15.7414	15.4988	15.7153	15.5741	15.7712	15.669	15.7863	15.7014	15.734	15.7722	15.91	15.887	15.8566	15.7616	15.8178	15.8454	15.8867	15.9687	15.8136	15.908	CAB39	CAB39;CAB39L	CAB39_HUMAN;CB39L_HUMAN	Q9H9S4;Q9Y376	Q9Y376;Q9H9S4	Calcium-binding protein 39-like	SASP	NA	up	NA	3	3	2	3	2	3	3	3	3	3	3	3	3	3	3	3	3	3
		15.0962	14.8242	14.8234	14.722	14.9779	14.9806	15.0631	14.9263	15.0693	15.0638	15.0637	15.0534	15.106	15.0475	15.0919	15.0516	15.1443	15.1008	15.1139	15.1966	SDF4	SDF4	CAB45_HUMAN	Q9BRK5	Q9BRK5	45 kDa calcium-binding protein	SASP	NA	altered	NA	31	30	26	29	29	32	31	30	27	30	31	29	31	29	29	28	30	30
		14.4457	13.6955	13.7541	13.1829	13.9225	14.0471	14.1723	14.0353	13.9674	13.8338	13.7474	14.0765	13.9379	14.013	14.4896	13.5437	14.1821	13.7364	13.8861	13.7746	CABIN1	CABIN1	CABIN_HUMAN	Q9Y6J0	Q9Y6J0	Calcineurin-binding protein cabin-1	NA	NA	NA	NA	5	5	4	4	5	4	4	3	4	6	3	3	2	4	3	2	3	4
		13.4211	13.3465	13.397	12.9533	13.3704	13.3468	13.3879	13.4531	13.335	13.216	13.4291	13.3932	13.2698	13.2746	13.1822	13.451	13.2071	13.6347	13.372	13.3844	CABLES2	CABLES2	CABL2_HUMAN	Q9BTV7	Q9BTV7	CDK5 and ABL1 enzyme substrate 2	NA	NA	NA	NA	3	3	3	3	3	3	3	3	3	3	3	3	3	3	3	3	3	3
		16.0624	16.5204	16.872	16.7871	17.0206	16.9788	16.3978	16.9156	17.0711	16.5097	16.4031	16.7384	16.4839	16.9153	16.828	16.7217	16.3545	16.3567	17.0766	17.3166	CABP7	CABP7	CABP7_HUMAN	Q86V35	Q86V35	Calcium-binding protein 7	NA	NA	NA	NA	1	1	1	1	1	1	1	1	1	1	1	1	1	1	1	1	1	1
		11.4234	10.984	10.6221	10.8716	11.2137	10.8747	11.4094	11.3131	10.79	11.0396	11.1328	11.2075	11.3406	11.3461	11.3246	11.299	11.3037	11.2834	11.2634	11.046	CACNA1C	CACNA1C	CAC1C_HUMAN	Q13936	Q13936;Q01668;O60840;Q13698	Voltage-dependent L-type calcium channel subunit alpha-1C	NA	NA	NA	NA	7	6	8	8	8	7	8	6	7	8	8	6	8	7	6	7	6	7
		14.9446	14.7228	14.8505	14.5999	14.953	14.7479	14.5982	14.6657	14.7437	14.6615	14.6725	14.5827	14.5818	14.5609	14.5461	14.6993	14.5981	14.6258	14.501	14.4006	CACNA1E	CACNA1E	CAC1E_HUMAN	Q15878	Q15878	Voltage-dependent R-type calcium channel subunit alpha-1E	NA	NA	NA	NA	1	1	1	1	1	1	1	1	1	1	1	1	1	1	1	1	1	1
		12.9517	13.1088	13.0335	12.9665	12.9598	13.1947	13.21	13.1527	13.0386	12.9534	12.7512	12.7649	12.8106	12.6409	12.8113	12.8706	12.6173	12.8215	12.7721	12.7671	CACNB3.1	CACNB3	CACB3_HUMAN	P54284	P54284	Voltage-dependent L-type calcium channel subunit beta-3	NA	NA	NA	NA	12	11	11	11	12	12	12	11	11	12	11	10	12	11	9	11	9	11
		10.6484	11.0148	10.601	11.2177	11.3668	11.2311	11.0923	11.3193	11.4002	11.729	11.4958	11.5345	11.755	11.1592	11.0119	11.6626	11.3379	11.4577	11.4664	11.3576	CACNB3	CACNB3;CACNB4	CACB3_HUMAN;CACB4_HUMAN	O00305;P54284	Q08289;P54284;O00305	Voltage-dependent L-type calcium channel subunit beta-4	NA	NA	NA	NA	1	1	1	1	1	1	1	1	1	1	1	1	1	1	1	1	1	1
		11.7277	11.5627	12.0423	12.3808	12.102	12.0205	11.4399	12.1966	12.1411	12.1177	9.56732	11.1215	10.4766	11.8826	11.6781	11.7704	11.2889	9.16571	11.7977	12.3578	CACNB4	CACNB4	CACB4_HUMAN	O00305	O00305	Voltage-dependent L-type calcium channel subunit beta-4	NA	NA	NA	NA	1	2	2	1	1	2	2	1	1	1	0	1	0	1	2	2	2	0
		12.508	12.3418	11.8366	11.8568	12.3195	12.2431	12.5527	12.4716	12.3578	12.3997	12.6448	12.3565	12.4498	12.4585	12.6023	12.0608	12.3938	12.3025	12.423	12.4626	CACUL1	CACUL1	CACL1_HUMAN	Q86Y37	Q86Y37	CDK2-associated and cullin domain-containing protein 1	NA	NA	NA	NA	6	6	5	6	6	6	6	6	6	6	5	5	5	6	6	4	5	6
		13.0769	12.7534	12.7601	12.9069	12.8248	12.8442	12.961	12.7279	12.9704	12.8285	12.9171	12.8727	12.81	12.8441	12.767	12.9451	12.859	12.7895	12.8328	12.7451	CALCOCO1	CALCOCO1	CACO1_HUMAN	Q9P1Z2	Q9P1Z2	Calcium-binding and coiled-coil domain-containing protein 1	NA	NA	NA	NA	16	15	15	15	16	16	15	15	15	14	16	13	13	12	13	13	11	12
		13.0019	12.7835	12.7498	12.7481	12.8444	13.0231	13.1045	12.8794	12.8189	12.7215	13.0676	12.9034	12.9064	12.9283	12.9098	12.9342	12.8737	12.744	12.9158	13.1002	CALCOCO2	CALCOCO2	CACO2_HUMAN	Q13137	Q13137	Calcium-binding and coiled-coil domain-containing protein 2	NA	NA	NA	NA	11	10	9	10	8	11	11	11	10	11	9	8	11	11	10	11	9	10
		15.6478	15.6926	15.7762	15.659	15.7455	15.7091	15.8499	15.8403	15.8337	15.7562	15.8003	15.9151	15.7833	15.7922	15.7323	15.8899	15.8099	15.8238	15.7347	15.7835	CRAT	CRAT	CACP_HUMAN	P43155	P43155	Carnitine O-acetyltransferase	NA	NA	NA	NA	31	31	30	28	33	30	31	31	34	30	32	31	32	32	33	31	32	31
		14.9455	14.8918	15.0269	14.9745	14.9946	14.8593	14.8397	14.9913	14.8719	14.9671	14.9567	15.025	15.0876	15.0134	15.087	14.8671	14.9125	14.9226	14.8327	14.9302	CDH11	CDH11	CAD11_HUMAN	P55287	P55287	Cadherin-11	SAASP	NA	NA	up	22	23	24	24	24	23	21	21	25	23	20	20	22	24	23	23	20	22
		14.685	14.3975	14.5768	14.6006	14.7317	14.3104	14.2829	14.5664	14.3396	14.5452	14.5967	14.979	15.0579	15.4549	15.1581	14.8547	15.2308	14.9954	14.9556	14.9852	CDH13	CDH13	CAD13_HUMAN	P55290	P55290	Cadherin-13	SASP	NA	altered	NA	4	4	4	4	4	4	4	4	4	4	4	4	4	4	4	4	4	4
		14.3067	14.1864	14.1799	14.4655	14.2058	14.0172	14.2344	14.2108	14.2951	14.2005	13.9722	14.0839	14.2688	14.3822	14.148	14.0367	14.0215	14.1469	14.0846	14.0705	CDH2	CDH2	CADH2_HUMAN	P19022	P19022	Cadherin-2	SAASP/SASP	NA	altered	up	15	16	16	16	15	16	15	16	16	16	16	13	16	14	14	15	14	16
		11.1348	11.0406	11.259	10.9742	10.9091	10.7148	11.213	10.8937	11.4968	8.57897	11.1916	11.7961	11.4479	12.1483	9.18869	11.2209	12.019	11.7196	11.5737	11.3957	CDH9	CDH9	CADH9_HUMAN	Q9ULB4	Q9ULB4	Cadherin-9	NA	NA	NA	NA	1	1	1	1	1	1	0	0	1	0	1	1	1	1	0	1	1	1
		10.2786	8.51085	8.55627	9.50176	9.08431	9.81515	8.91731	8.6439	10.0757	11.0588	10.3414	8.97611	11.1482	10.4368	10.2603	8.83053	9.39277	9.26432	9.54249	9.39616	CADM4	CADM4	CADM4_HUMAN	Q8NFZ8	Q8NFZ8	Cell adhesion molecule 4	NA	NA	NA	NA	0	1	1	1	1	0	1	0	0	0	0	1	0	0	0	0	1	1
		13.7267	13.6955	13.5839	13.417	13.5782	13.6274	13.7612	13.5517	13.4658	13.7703	13.6407	13.5766	13.7016	13.611	13.6054	13.4449	13.5149	13.5645	13.6407	13.5971	IBA57	IBA57	CAF17_HUMAN	Q5T440	Q5T440	Putative transferase CAF17, mitochondrial	SASP	NA	up	NA	7	8	9	9	8	8	7	8	9	9	8	8	9	8	8	8	9	8
		11.6601	11.7692	11.859	11.6568	11.7824	11.3912	11.837	11.652	11.5837	11.7996	11.0371	11.0311	11.1041	11.2055	10.9538	11.5342	10.9874	11.3534	11.2576	11.3513	CHAF1A	CHAF1A	CAF1A_HUMAN	Q13111	Q13111	Chromatin assembly factor 1 subunit A	NA	NA	NA	NA	2	2	2	2	2	2	2	2	2	2	1	1	2	1	2	2	2	2
		11.227	11.7488	11.826	11.3365	11.6028	10.8159	11.3039	11.1798	11.0685	11.422	11.1041	10.1079	10.5196	10.7481	11.1261	11.2927	10.9085	11.3954	11.2049	11.2498	CHAF1B	CHAF1B	CAF1B_HUMAN	Q13112	Q13112	Chromatin assembly factor 1 subunit B	NA	NA	NA	NA	2	3	2	3	2	2	3	3	3	2	2	0	0	2	2	2	3	1
		12.4183	12.5022	12.3863	12.0996	12.5439	12.5982	12.8285	12.628	12.6563	12.6052	12.8153	12.8139	12.7611	12.6891	12.5861	12.8951	12.5667	12.6838	13.0392	12.7763	CA12	CA12	CAH12_HUMAN	O43570	O43570	Carbonic anhydrase 12	NA	NA	NA	NA	4	6	6	5	5	5	5	6	6	6	5	5	4	6	5	6	4	6
		11.8515	12.0511	11.6576	11.6462	11.6664	11.8755	11.9498	11.9133	11.968	11.8309	11.996	12.0752	12.2129	12.1785	12.1206	12.0434	11.9953	12.0132	12.0023	12.1951	CA13	CA13	CAH13_HUMAN	Q8N1Q1	Q8N1Q1	Carbonic anhydrase 13	SASP	NA	up	NA	4	3	4	5	4	4	4	3	4	4	4	2	4	5	4	5	4	4
		14.0246	14.1056	14.1842	13.885	14.2062	14.1805	14.5088	14.3015	14.1447	14.215	14.2963	14.3347	14.2929	14.4317	14.2466	14.5399	14.6519	14.6026	14.608	14.7345	CA5B	CA5B	CAH5B_HUMAN	Q9Y2D0	Q9Y2D0	Carbonic anhydrase 5B, mitochondrial	NA	NA	NA	NA	9	9	9	8	9	8	9	9	8	9	9	8	8	8	8	8	7	8
		12.8917	13.0674	13.231	13.1437	13.2803	12.9185	13.0232	13.0354	12.9489	13.223	12.5516	12.8023	12.843	12.7805	12.7335	12.5969	12.6359	12.7016	12.6727	12.8313	CACHD1	CACHD1	CAHD1_HUMAN	Q5VU97	Q5VU97	VWFA and cache domain-containing protein 1	NA	NA	NA	NA	10	10	12	12	11	14	13	13	13	11	9	11	13	12	12	9	10	14
		13.991	14.2127	14.5205	14.4296	14.4468	14.5085	14.2278	14.4429	14.4801	14.3975	14.0257	14.0574	14.0486	14.072	13.9485	14.2465	14.1093	13.9988	13.9018	14.1766	CALHM2	CALHM2	CAHM2_HUMAN	Q9HA72	Q9HA72	Calcium homeostasis modulator protein 2	NA	NA	NA	NA	12	15	14	14	14	14	14	15	14	14	14	14	13	15	14	14	13	14
		13.5211	13.4425	13.7163	13.7463	13.8534	13.5026	13.5099	13.5745	13.6609	13.6163	13.7602	13.8903	14.0325	13.7686	13.8601	13.9157	13.7956	13.7154	13.5448	13.6547	CALHM5	CALHM5	CAHM5_HUMAN	Q8N5C1	Q8N5C1	Calcium homeostasis modulator protein 5	NA	NA	NA	NA	7	8	8	8	9	8	8	9	8	9	7	8	8	8	7	6	6	8
		19.463	19.4168	19.1879	19.2383	19.3847	19.3324	19.2498	19.3001	19.4125	19.4348	19.4976	19.5895	19.6872	19.5294	19.5515	19.6114	19.5438	19.4306	19.3797	19.3927	CALD1	CALD1	CALD1_HUMAN	Q05682	Q05682	Caldesmon	SASP	NA	up	NA	155	165	155	155	158	160	159	155	161	159	156	161	160	158	155	160	155	154
		14.9222	15.961	16.2793	16.8784	15.9952	15.8503	15.688	15.8615	15.74	15.7309	15.9586	16.1077	16.2318	16.0527	16.3724	15.4475	14.9158	15.8375	16.2251	16.1748	CALML3.1	CALML3	CALL3_HUMAN	P27482	P27482;P0DP23;P0DP24;P0DP25	Calmodulin-like protein 3	NA	NA	NA	NA	1	2	2	1	1	2	2	1	1	1	2	1	1	1	1	1	1	1
		13.5629	13.8297	15.1371	15.0555	13.8807	14.1541	13.7179	13.7657	14.7152	14.7447	14.0547	14.2206	13.7552	14.2244	14.242	13.5462	13.577	14.153	14.4026	14.5291	CALML3	CALML3;TNNC2	CALL3_HUMAN;TNNC2_HUMAN	P02585;P27482	P27482;P0DP23;P0DP24;P0DP25;P02585	Troponin C, skeletal muscle	NA	NA	NA	NA	1	1	1	1	1	1	1	1	1	1	1	1	1	1	1	1	1	1
		11.8108	11.5069	12.4695	11.6415	12.2436	12.345	14.5848	10.0638	11.7237	12.3241	12.8633	11.4431	13.0458	10.5958	10.2378	12.1209	11.0145	9.18836	14.3519	14.4707	CALML5	CALML5	CALL5_HUMAN	Q9NZT1	Q9NZT1	Calmodulin-like protein 5	SASP	NA	up	NA	2	1	3	3	2	3	10	2	3	2	5	2	2	1	2	2	2	1
		17.6389	17.9385	18.1517	18.5528	17.4737	17.8222	18.1238	18.0463	18.0547	17.5467	17.928	17.6456	17.6131	17.6931	17.3918	16.6237	16.6348	17.5543	16.9427	16.9222	CALM1	CALM1;CALM2;CALM3	CALM1_HUMAN;CALM2_HUMAN;CALM3_HUMAN	P0DP23;P0DP24;P0DP25	P0DP23;P0DP24;P0DP25	Calmodulin-1	SASP	NA	altered	NA	16	16	18	17	16	17	17	17	18	16	17	16	16	15	16	14	15	15
		19.4266	19.4684	19.6131	19.761	19.5337	19.4442	19.3819	19.4778	19.4529	19.5826	19.4084	19.494	19.4337	19.4612	19.3215	19.4531	19.4823	19.3342	19.3109	19.37	CALR	CALR	CALR_HUMAN	P27797	P27797	Calreticulin	SASP	NA	altered	NA	47	49	50	48	47	49	48	47	48	49	46	46	48	47	45	45	47	47
		16.8954	16.8541	16.7976	17.0807	16.845	16.6165	16.4706	16.8249	16.5449	16.6516	16.3439	16.3794	16.2289	16.5037	16.3935	16.207	16.3275	16.1248	16.2939	16.3503	CALR.1	CALR;CANX	CALR_HUMAN;CALX_HUMAN	P27797;P27824	P27797;P27824	Calreticulin	SASP	NA	altered	NA	1	1	1	1	1	1	1	1	1	1	1	1	1	1	1	1	1	1
		19.2349	19.0531	19.0629	19.0658	19.1791	19.2089	19.1588	19.1547	19.2834	19.3055	19.3189	19.2968	19.3447	19.2917	19.2444	19.3592	19.3296	19.2823	19.2349	19.2897	CALU	CALU	CALU_HUMAN	O43852	O43852	Calumenin	SASP	NA	altered	NA	61	61	59	62	60	61	59	60	60	62	61	58	60	60	58	60	59	61
		18.8417	18.7775	18.7082	18.6385	18.7991	18.7905	18.8092	18.8289	18.8058	18.8251	18.9886	19.0459	19.0361	19.0047	19.0072	18.9953	19.0353	19.0583	19.0229	19.0528	CANX	CANX	CALX_HUMAN	P27824	P27824	Calnexin	SASP	NA	altered	NA	76	75	69	72	74	75	70	80	71	72	76	77	78	78	78	76	78	79
		12.4339	12.3782	12.3425	12.6442	12.6389	12.5931	12.5165	12.5434	12.4733	12.6799	12.3231	12.8098	12.457	12.0896	12.29	12.604	12.5801	12.5308	12.1331	12.4254	CAMLG	CAMLG	CAMLG_HUMAN	P49069	P49069	Calcium signal-modulating cyclophilin ligand	NA	NA	NA	NA	6	7	6	7	6	7	7	7	7	7	5	6	7	6	6	6	6	6
		12.6998	12.4948	12.3858	12.4333	12.4048	12.3957	12.4625	12.4306	12.4805	12.2907	12.4673	12.4466	12.4357	12.432	12.4128	12.3928	12.271	12.3045	12.3408	12.5634	CAMSAP1	CAMSAP1	CAMP1_HUMAN	Q5T5Y3	Q5T5Y3	Calmodulin-regulated spectrin-associated protein 1	NA	NA	NA	NA	17	17	17	17	16	19	16	17	16	17	15	14	19	17	14	17	15	18
		13.8693	13.7101	13.6508	13.7649	13.7202	13.8718	13.8394	13.6634	13.7414	13.7458	13.8881	13.7001	13.83	13.7171	13.6809	13.7896	13.7154	13.6738	13.7701	13.7281	CAMSAP2	CAMSAP2	CAMP2_HUMAN	Q08AD1	Q08AD1	Calmodulin-regulated spectrin-associated protein 2	NA	NA	NA	NA	29	32	30	30	31	31	29	29	29	27	31	30	32	29	26	32	27	33
		17.561	17.6659	17.7831	17.7462	17.7544	17.7494	17.6949	17.759	17.8443	17.8106	17.7796	17.9331	17.7598	17.7719	17.7659	17.781	17.7534	17.7894	17.7852	17.7858	CAPN1	CAPN1	CAN1_HUMAN	P07384	P07384	Calpain-1 catalytic subunit	SASP	NA	down	NA	57	61	61	64	61	60	57	59	63	64	58	58	62	61	60	59	56	60
		11.9339	11.6271	11.6045	11.7844	11.8591	11.8136	11.9138	11.6657	11.789	11.9677	11.9399	11.9566	11.9851	11.7301	11.7444	11.68	11.6798	11.8814	11.8472	11.9444	CAPN15	CAPN15	CAN15_HUMAN	O75808	O75808	Calpain-15	NA	NA	NA	NA	9	10	8	9	9	10	8	10	10	10	9	10	10	9	8	9	8	7
		18.7617	18.6648	18.723	18.672	18.7725	18.8015	18.8148	18.6193	18.8564	18.931	19.122	19.1187	19.0741	19.0473	19.0856	18.9804	19.0527	19.1119	19.0776	19.0955	CAPN2	CAPN2	CAN2_HUMAN	P17655	P17655	Calpain-2 catalytic subunit	SASP	NA	altered	NA	55	57	54	55	53	58	56	54	56	58	54	54	56	56	55	54	51	53
		16.2365	16.2067	16.3897	16.2884	16.3704	16.3635	16.2922	16.3389	16.4293	16.3048	16.4635	16.4252	16.3094	16.2275	16.2421	16.3961	16.2749	16.19	16.1799	16.2698	CAPN5	CAPN5	CAN5_HUMAN	O15484	O15484	Calpain-5	NA	NA	NA	NA	30	34	30	31	33	32	30	34	31	31	27	31	30	30	30	30	29	31
		13.5244	13.356	13.3458	13.4635	13.413	13.5625	13.4956	13.3856	13.4291	13.5069	13.5449	13.5309	13.615	13.6185	13.5825	13.5753	13.5739	13.5302	13.6321	13.5135	CAPN7	CAPN7	CAN7_HUMAN	Q9Y6W3	Q9Y6W3	Calpain-7	NA	NA	NA	NA	24	24	24	21	26	26	25	25	25	29	28	27	26	27	28	29	26	26
		14.0249	14.2543	14.3626	14.7087	14.2746	14.1204	14.2053	14.2915	14.2753	14.0908	13.7837	13.9748	13.968	13.9302	13.9117	13.9338	13.8147	13.8412	13.7708	13.8436	PPP3R1	PPP3R1	CANB1_HUMAN	P63098	P63098	Calcineurin subunit B type 1	NA	NA	NA	NA	6	7	9	9	9	9	8	9	9	9	8	7	8	7	8	7	7	7
		18.1376	18.0776	17.8555	17.9121	17.9964	18.1926	18.1419	18.0975	18.2105	18.1726	18.192	18.1608	18.2196	18.1898	18.1803	18.1062	18.1408	18.1552	18.1607	18.1524	CAND1.1	CAND1	CAND1_HUMAN	Q86VP6	Q86VP6	Cullin-associated NEDD8-dissociated protein 1	SASP	NA	down	NA	68	74	70	64	73	75	73	72	71	68	72	67	69	69	68	68	66	68
		14.9431	15.1195	15.1918	15.1212	14.6839	14.9835	14.663	14.8803	15.3474	15.1329	14.8739	14.9467	15.0699	14.7527	14.9662	14.9133	15.0142	15.1074	14.9197	15.0128	CAND1	CAND1;CAND2	CAND1_HUMAN;CAND2_HUMAN	O75155;Q86VP6	Q86VP6;O75155	Cullin-associated NEDD8-dissociated protein 2	SASP	NA	down;up	NA	8	9	6	7	8	9	9	9	9	9	9	9	9	8	9	9	9	9
		13.0002	13.0636	12.7238	12.7108	12.838	13.0058	12.9198	12.8426	13.0921	13.0615	12.4935	12.3794	12.5289	12.6291	12.5393	12.5572	12.6301	12.5084	12.5709	12.4548	CAND2	CAND2	CAND2_HUMAN	O75155	O75155	Cullin-associated NEDD8-dissociated protein 2	SASP	NA	up	NA	8	8	7	6	8	8	8	8	8	6	6	4	3	5	6	6	3	4
		12.8203	13.1055	13.0079	13.0906	13.0732	12.9009	12.9042	12.9879	13.1837	13.0759	12.7837	12.8637	12.6492	12.6068	12.8382	13.0556	12.6469	12.8125	12.6778	12.8638	CANT1	CANT1	CANT1_HUMAN	Q8WVQ1	Q8WVQ1	Soluble calcium-activated nucleotidase 1	NA	NA	NA	NA	10	12	13	12	12	11	13	13	13	12	11	11	12	11	9	11	11	9
		19.7694	19.7998	19.5617	19.6509	19.7185	19.749	19.6931	19.6054	19.7729	19.6304	19.6267	19.5994	19.6392	19.5397	19.5938	19.5323	19.481	19.5445	19.5153	19.5886	CAP1.1	CAP1	CAP1_HUMAN	Q01518	Q01518	Adenylyl cyclase-associated protein 1	SASP	NA	altered	NA	57	58	55	57	55	55	53	57	57	55	53	56	56	57	57	54	52	54
		17.8361	18.1292	18.0855	18.4704	17.9383	17.3835	17.6073	17.7506	17.8124	17.7329	17.1068	17.2734	17.3185	17.259	17.2663	17.2976	17.115	17.1437	17.2382	17.3631	CAP1	CAP1;CAP2	CAP1_HUMAN;CAP2_HUMAN	P40123;Q01518	Q01518;P40123	Adenylyl cyclase-associated protein 2	SASP	NA	altered	NA	1	1	1	1	1	1	1	1	1	1	1	1	1	1	1	1	1	1
		16.3019	16.2702	16.185	16.2205	16.3005	16.2673	16.2435	16.211	16.3229	16.2989	16.2127	16.2231	16.2368	16.1708	16.1676	16.2428	16.0472	16.0883	16.0647	16.1347	CAP2	CAP2	CAP2_HUMAN	P40123	P40123	Adenylyl cyclase-associated protein 2	NA	NA	NA	NA	27	28	30	29	28	29	27	29	28	29	25	28	27	26	27	26	25	26
		12.8085	12.6559	12.4946	12.5938	12.7571	13.0354	12.9348	12.8116	12.8429	12.6949	12.7538	12.8482	12.8847	12.9202	12.7002	12.9974	12.7805	12.9522	12.6648	12.8052	PCIF1	PCIF1	CAPAM_HUMAN	Q9H4Z3	Q9H4Z3	mRNA (2'-O-methyladenosine-N(6)-)-methyltransferase	NA	NA	NA	NA	10	13	12	13	12	13	12	13	12	12	11	10	10	12	11	11	11	11
		16.9808	17.0337	17.078	16.9775	17.0442	17.0798	17.073	17.1309	17.1809	17.1939	17.0878	17.1348	17.1307	17.0365	16.9621	17.0664	17.0899	17.0977	17.0885	17.179	CAPG	CAPG	CAPG_HUMAN	P40121	P40121	Macrophage-capping protein	SASP	NA	altered	NA	23	23	23	22	23	21	22	24	24	24	23	21	24	22	23	22	22	23
		11.7015	11.3461	11.1232	11.5182	11.3578	11.6366	11.4155	11.7062	11.7132	11.3286	11.6423	11.6674	11.7265	11.5312	11.9523	11.0476	11.3751	11.4996	11.6647	11.8292	NOS1AP	NOS1AP	CAPON_HUMAN	O75052	O75052	Carboxyl-terminal PDZ ligand of neuronal nitric oxide synthase protein	NA	NA	NA	NA	6	4	4	4	6	5	4	5	3	6	4	4	4	4	4	5	5	5
		17.1669	17.1949	17.1954	17.2125	17.1522	17.1767	17.0578	17.0964	17.1774	17.1438	16.9717	17.0035	17.0653	16.9209	16.9144	17.0094	16.818	16.8446	16.8504	17.1337	CAPRIN1	CAPRIN1	CAPR1_HUMAN	Q14444	Q14444	Caprin-1	NA	NA	NA	NA	22	21	19	21	22	22	23	22	23	23	22	20	22	23	22	21	19	22
		19.6985	19.6472	19.5679	19.6056	19.6765	19.6639	19.6511	19.6486	19.8813	19.9302	19.824	19.9178	19.8329	19.8767	19.8064	19.8114	19.952	19.8831	19.9138	19.886	CAPZB	CAPZB	CAPZB_HUMAN	P47756	P47756	F-actin-capping protein subunit beta	SASP	NA	altered	NA	42	41	40	40	41	41	40	40	41	42	40	42	42	39	42	41	42	40
		13.6491	13.5073	13.1898	13.3123	13.4195	13.8195	13.6793	13.5671	13.567	13.4609	13.8333	13.6857	13.7072	13.8753	13.681	13.5745	13.6238	13.8005	13.7406	13.5957	CARD19	CARD19	CAR19_HUMAN	Q96LW7	Q96LW7	Caspase recruitment domain-containing protein 19	NA	NA	NA	NA	6	7	6	7	7	7	7	6	6	6	6	6	7	6	5	6	5	6
		10.4613	10.1582	10.1962	10.2816	10.3232	10.6028	10.7597	10.4749	10.7142	10.7254	10.7981	10.8168	10.5711	11.0139	11.0099	10.5033	10.9435	11.0456	10.643	10.8987	CARD6	CARD6	CARD6_HUMAN	Q9BX69	Q9BX69	Caspase recruitment domain-containing protein 6	NA	NA	NA	NA	3	4	4	4	3	4	4	3	3	4	3	2	4	3	4	4	3	4
		12.0032	12.2818	13.0506	11.609	11.9264	11.9723	11.7617	12.3054	12.0525	12.3327	12.288	12.3237	12.4629	12.5354	12.3986	12.3503	12.2294	8.94329	12.6517	12.4272	CARD8	CARD8	CARD8_HUMAN	Q9Y2G2	Q9Y2G2	Caspase recruitment domain-containing protein 8	NA	NA	NA	NA	1	1	1	2	2	1	1	2	1	2	2	1	1	1	1	2	2	0
		11.9113	12.3017	12.5149	12.0576	12.0775	12.383	12.0587	12.0388	12.2985	12.1434	12.1571	12.0788	12.2634	12.0225	12.028	12.2772	12.1418	11.9395	11.6144	11.9008	CARD9	CARD9	CARD9_HUMAN	Q9H257	Q9H257	Caspase recruitment domain-containing protein 9	NA	NA	NA	NA	6	6	6	6	5	5	6	5	6	5	4	3	5	4	4	4	2	6
		14.6971	14.6756	14.6626	14.7366	14.7558	14.9292	14.8147	14.8205	14.7639	14.8218	14.6428	14.6221	14.6492	14.5287	14.407	14.6209	14.5278	14.5198	14.5069	14.5427	CDKN2AIP	CDKN2AIP	CARF_HUMAN	Q9NXV6	Q9NXV6	CDKN2A-interacting protein	NA	NA	NA	NA	24	23	23	22	24	24	24	24	23	24	23	22	24	23	21	22	23	23
		14.8028	14.7385	14.5857	14.7136	14.6843	14.8283	14.7979	14.7443	14.7006	14.7133	14.6804	14.6455	14.7502	14.7052	14.6167	14.7449	14.591	14.5931	14.6012	14.6293	CARMIL1	CARMIL1	CARL1_HUMAN	Q5VZK9	Q5VZK9	F-actin-uncapping protein LRRC16A	NA	NA	NA	NA	38	42	43	43	43	43	42	44	43	41	41	40	40	39	39	43	41	42
		12.5107	12.1707	12.4678	12.212	11.9953	12.3284	12.0875	12.6063	12.4794	12.3703	12.5569	12.7239	12.3564	12.4409	12.2773	12.7537	12.2656	12.4413	12.0631	12.3041	CARMIL2	CARMIL2	CARL2_HUMAN	Q6F5E8	Q6F5E8	Capping protein, Arp2/3 and myosin-I linker protein 2	NA	NA	NA	NA	2	4	2	3	4	4	3	4	4	4	4	3	4	3	3	4	4	4
		16.2037	16.2986	16.2963	16.2996	16.2853	16.2546	16.2282	16.2862	16.3125	16.4159	16.1374	16.237	16.166	16.0758	16.0027	16.1821	16.1199	16.1316	16.1012	16.1495	CARM1	CARM1	CARM1_HUMAN	Q86X55	Q86X55	Histone-arginine methyltransferase CARM1	NA	NA	NA	NA	18	19	19	18	19	19	19	19	19	20	19	18	18	20	19	19	19	18
		12.2415	12.3349	12.4851	12.3757	12.3706	12.2191	12.2991	12.5029	12.222	12.4717	12.0335	11.6481	12.2143	11.8882	12.1755	12.181	12.1083	11.9521	12.0663	12.1367	CARNMT1	CARNMT1	CARME_HUMAN	Q8N4J0	Q8N4J0	Carnosine N-methyltransferase	NA	NA	NA	NA	5	8	7	7	6	8	7	6	7	7	6	3	6	6	6	7	7	6
		12.3965	11.9361	11.7058	11.7731	12.0506	12.1022	12.3361	11.9386	12.3462	12.1705	12.3076	12.3468	12.4331	12.3192	12.4676	12.1215	12.236	12.2615	12.2248	12.3347	CASC3	CASC3	CASC3_HUMAN	O15234	O15234	Protein CASC3	NA	NA	NA	NA	10	8	8	7	10	9	10	9	10	10	10	9	9	10	10	7	9	10
		13.3302	12.9009	12.7824	12.6948	12.8543	13.1214	13.0335	12.9737	13.0862	13.0699	13.1187	12.9818	13.2043	13.0976	13.1722	13.0942	13.0061	13.0519	12.9755	13.2609	CUX1.2	CUX1	CASP_HUMAN	Q13948	Q13948	Protein CASP	NA	NA	NA	NA	12	13	11	12	11	13	11	12	12	13	12	11	11	12	12	11	11	13
		13.8214	13.4407	13.4444	13.4816	13.5949	13.6767	13.5668	13.3128	13.7081	13.534	13.4864	13.2621	13.3916	13.261	13.4839	13.3203	13.2088	13.3529	13.3376	13.3523	CUX1.1	CUX1	CASP_HUMAN;CUX1_HUMAN	P39880;Q13948	Q13948;P39880	Homeobox protein cut-like 1	NA	NA	NA	NA	18	16	17	16	19	18	18	17	20	20	17	14	17	17	16	19	14	18
		14.8931	14.8727	14.5718	14.6339	14.8614	14.9566	15.0869	14.952	14.7265	14.9813	14.939	15.0383	14.9674	14.9335	14.9288	14.9914	14.9344	15.0245	14.9379	14.9911	CASP1	CASP1	CASP1_HUMAN	P29466	P29466	Caspase-1	NA	NA	NA	NA	19	20	20	20	20	20	20	21	22	22	21	20	22	21	21	20	20	20
		12.3593	12.3349	12.115	11.9456	12.1914	12.1823	12.571	11.9871	12.2499	12.2891	12.2411	12.1369	11.6431	11.9803	11.814	11.8105	11.9777	12.1504	11.9221	11.8165	CASP2	CASP2	CASP2_HUMAN	P42575	P42575	Caspase-2	NA	NA	NA	NA	7	6	6	6	6	7	5	5	5	6	6	6	5	5	6	6	5	4
		15.5363	15.4576	15.2523	15.2618	15.3868	15.3541	15.3812	15.4816	15.398	15.4494	15.4908	15.8501	15.6661	15.6199	15.6866	15.58	15.6755	15.4832	15.551	15.6748	CASP3	CASP3	CASP3_HUMAN	P42574	P42574	Caspase-3	NA	NA	NA	NA	10	9	12	11	12	11	12	10	13	11	13	11	11	11	13	11	12	12
		14.1455	13.9926	13.8676	14.0203	14.1076	14.1494	14.0948	14.0276	14.1265	14.1034	14.0287	13.9769	14.0997	14.003	14.0643	14.1504	13.9951	14.0412	13.8912	13.9796	CASP4	CASP4	CASP4_HUMAN	P49662	P49662;Q6UXS9	Caspase-4	NA	NA	NA	NA	13	15	14	14	15	15	15	15	16	14	16	15	16	14	15	14	16	15
		14.216	14.1404	13.7401	13.8575	13.977	14.0517	14.241	14.1864	14.1215	14.2234	13.9552	14.0066	14.0508	14.1535	14.2038	14.1312	14.0699	14.1378	14.3335	14.4087	CASP6	CASP6	CASP6_HUMAN	P55212	P55212	Caspase-6	SASP	NA	up	NA	10	11	10	9	10	10	11	11	11	10	10	11	11	12	10	12	9	12
		14.6237	14.6245	14.6857	14.6109	14.8593	14.7774	14.6802	14.8098	14.7256	14.7051	14.708	14.8593	14.8616	14.7894	14.7785	14.8994	14.7769	14.752	14.7748	14.8305	CASP7	CASP7	CASP7_HUMAN	P55210	P55210	Caspase-7	NA	NA	NA	NA	13	13	14	12	12	13	13	12	13	14	13	12	13	11	13	12	12	13
		13.7853	13.5947	13.4486	13.4393	13.7169	13.6849	13.7955	13.5941	13.6343	13.6481	13.6634	13.5698	13.6759	13.5893	13.5205	13.6853	13.3423	13.5851	13.5927	13.6327	CASP8	CASP8	CASP8_HUMAN	Q14790	Q14790	Caspase-8	NA	NA	NA	NA	11	12	12	8	12	14	12	9	11	13	12	12	12	11	12	12	10	13
		11.7458	10.7568	11.3305	11.5236	11.6559	11.5545	11.6372	11.3476	11.6718	11.1813	11.8349	11.6107	12.2703	12.0266	12.2183	11.7759	11.6386	11.9613	12.1481	11.8401	CASP9	CASP9	CASP9_HUMAN	P55211	P55211	Caspase-9	NA	NA	NA	NA	1	1	1	1	1	1	1	1	1	1	1	1	1	1	1	1	1	1
		11.12	10.6639	10.6354	11.2091	11.1245	11.7128	11.16	11.2553	10.8958	11.2786	11.1863	11.1947	11.1952	11.2304	11.2358	11.0109	11.0253	10.8455	11.294	10.6763	CASP10	CASP10	CASPA_HUMAN	Q92851	Q92851	Caspase-10	NA	NA	NA	NA	3	3	3	3	3	3	3	3	2	2	3	3	3	2	3	3	3	2
		11.7427	11.1514	11.8884	11.4213	11.4285	11.5762	13.8724	11.7161	12.1409	11.4061	11.4798	10.8269	11.748	9.80752	11.6321	11.8926	10.9892	11.1069	11.4123	11.4043	CASP14	CASP14	CASPE_HUMAN	P31944	P31944	Caspase-14	SASP	NA	up	NA	7	1	9	4	5	9	14	1	1	4	1	0	4	0	1	6	0	2
		11.2559	10.3464	10.602	9.81915	10.1109	10.7649	10.7638	10.7672	10.9999	11.3677	10.2483	10.2608	10.4096	10.6229	10.6141	10.3938	10.7437	10.5059	10.3144	10.808	CASQ1	CASQ1	CASQ1_HUMAN	P31415	P31415	Calsequestrin-1	NA	NA	NA	NA	1	1	1	1	1	1	1	1	1	1	2	2	3	3	1	1	1	1
		11.7768	11.263	11.8663	11.4821	11.8717	11.5295	11.686	11.8235	11.6659	12.0045	11.8473	11.8248	12.2877	11.9806	11.8487	12.0891	11.8095	11.954	11.7682	12.0979	CASTOR1.1	CASTOR1	CAST1_HUMAN	Q8WTX7	Q8WTX7	Cytosolic arginine sensor for mTORC1 subunit 1	NA	NA	NA	NA	2	2	2	1	2	2	2	1	2	2	2	2	2	1	1	2	2	2
		12.4842	12.3265	12.2474	12.3242	12.3411	11.9913	12.2592	12.2955	11.7701	12.3751	12.5048	12.2959	12.4872	12.4632	12.3761	12.1869	12.4679	12.24	12.3725	12.6237	CASTOR1	CASTOR1;CASTOR2	CAST1_HUMAN;CAST2_HUMAN	A6NHX0;Q8WTX7	Q8WTX7;A6NHX0	Cytosolic arginine sensor for mTORC1 subunit 2	NA	NA	NA	NA	2	2	1	1	1	2	2	2	2	2	2	2	2	2	2	2	2	2
		12.8835	12.5996	12.7439	12.7852	12.7779	12.7117	12.9176	12.9087	12.844	12.7834	12.8009	12.8405	12.8383	12.7755	12.7704	12.8553	12.6328	12.8513	12.7475	12.8193	CASTOR2	CASTOR2	CAST2_HUMAN	A6NHX0	A6NHX0	Cytosolic arginine sensor for mTORC1 subunit 2	NA	NA	NA	NA	9	11	11	10	10	12	9	9	11	12	11	10	12	9	9	10	11	9
		17.2743	17.1983	17.1558	17.1448	17.1624	17.1883	17.3057	17.3042	17.2716	17.2546	17.1889	17.274	17.2582	17.246	17.1599	17.2552	17.3858	17.3568	17.2389	17.3053	CAT	CAT	CATA_HUMAN	P04040	P04040	Catalase	NA	NA	NA	NA	42	46	42	43	45	48	45	43	47	45	43	43	45	45	42	45	45	44
		19.2293	19.2077	18.9102	18.9904	19.0654	19.1115	19.2082	19.1652	19.296	19.4214	19.565	19.7212	19.605	19.6366	19.5451	19.4604	19.6943	19.6761	19.5677	19.5977	CTSB	CTSB	CATB_HUMAN	P07858	P07858	Cathepsin B	SASP	up	altered	NA	42	44	43	43	43	44	44	44	44	45	42	42	43	43	41	42	45	43
		16.8243	16.8262	16.6356	16.7023	16.7169	16.8138	16.8672	16.69	16.7188	16.9635	16.9359	17.0164	16.8997	16.9786	16.9622	16.9013	17.0543	17.0592	17.0413	17.171	CTSC	CTSC	CATC_HUMAN	P53634	P53634	Dipeptidyl peptidase 1	SASP	NA	altered	NA	25	25	22	24	25	24	23	23	24	24	22	23	20	24	23	24	22	23
		18.9025	18.9621	19.0158	18.8875	18.8983	18.9086	18.8533	18.9135	19.0286	19.1055	19.2443	19.4482	19.2675	19.2422	19.1639	19.1614	19.2953	19.2978	19.1547	19.1486	CTSD	CTSD	CATD_HUMAN	P07339	P07339	Cathepsin D	SASP	NA	altered	NA	32	33	30	33	32	33	33	32	33	33	33	33	33	33	33	32	32	32
		14.1655	14.1357	14.3488	14.4299	14.2177	14.4681	14.3536	14.6711	14.5289	14.3499	14.3249	14.5409	14.5678	14.4917	14.6264	14.6556	14.8092	14.7422	14.677	14.6249	CTSF	CTSF	CATF_HUMAN	Q9UBX1	Q9UBX1	Cathepsin F	NA	NA	NA	NA	4	3	4	3	3	3	3	4	4	3	3	1	3	4	3	3	2	3
		9.54389	10.9442	11.9149	10.9506	11.1538	11.6622	11.8125	11.2905	11.0305	11.5791	10.0344	10.7466	10.8457	10.783	10.1995	11.62	10.4451	10.5716	10.8522	11.2623	CTSH	CTSH	CATH_HUMAN	P09668	P09668	Pro-cathepsin H	NA	NA	NA	NA	1	1	1	1	1	1	2	1	2	1	1	1	2	2	1	1	1	2
		12.4039	12.376	12.1366	12.1122	12.2872	12.2709	12.51	12.3677	12.2645	12.37	12.3196	12.1054	12.2163	12.1464	12.1793	12.3183	12.1133	12.0937	12.1712	12.1547	CACTIN	CACTIN	CATIN_HUMAN	Q8WUQ7	Q8WUQ7	Cactin	NA	NA	NA	NA	10	10	9	10	9	10	8	9	9	9	10	7	8	8	7	8	7	8
		14.9447	14.8458	14.8961	14.5598	14.7518	14.5065	14.6334	14.6752	14.6928	14.8666	14.9079	15.0349	14.9445	14.9728	14.7488	14.9543	14.9464	14.7462	14.5419	14.585	CTSK.1	CTSK	CATK_HUMAN	P43235	P43235	Cathepsin K	NA	NA	NA	NA	4	5	4	5	5	5	5	5	5	5	5	5	5	5	5	5	4	5
		11.7726	11.2028	11.7833	10.9959	11.8247	11.5374	11.9836	11.682	11.8191	11.4311	11.6817	11.7424	11.4914	11.6096	11.7066	11.8077	12.4888	12.023	11.9134	11.8353	CTSK	CTSK;CTSV	CATK_HUMAN;CATL2_HUMAN	O60911;P43235	P43235;O60911	Cathepsin L2	NA	NA	NA	NA	1	1	1	1	1	1	1	1	1	1	1	1	1	1	1	1	1	1
		16.9705	16.8833	16.8645	16.9891	16.9519	16.9415	17.0707	17.067	16.8737	17.1467	16.9695	16.9411	16.8942	16.7863	16.7645	16.9671	16.8338	16.8686	16.7297	16.8407	CTSL	CTSL	CATL1_HUMAN	P07711	P07711	Procathepsin L	SASP	NA	altered	NA	11	11	11	11	11	11	11	11	11	11	11	11	11	11	11	11	11	11
		9.322	10.2257	10.0626	10.5947	9.97164	10.3754	10.0859	10.4361	10.1213	10.0975	8.98969	10.1072	9.42777	9.47072	10.1589	9.60228	10.0634	9.51757	9.76887	9.93276	CTSO	CTSO	CATO_HUMAN	P43234	P43234	Cathepsin O	NA	NA	NA	NA	1	1	2	0	1	1	1	1	1	1	1	1	1	1	1	1	0	1
		17.4178	17.286	17.1001	17.277	17.197	17.1925	17.4903	17.2367	17.3624	17.4901	17.7506	18.0372	17.8252	17.8937	17.7332	17.8047	17.8857	17.9898	17.7097	17.7787	CTSZ	CTSZ	CATZ_HUMAN	Q9UBR2	Q9UBR2	Cathepsin Z	SASP	NA	altered	NA	12	11	10	11	10	12	11	11	11	11	12	13	11	11	11	11	11	12
		19.0388	19.0055	19.1014	19.1134	18.982	19.0155	19.0907	18.9756	19.0453	19.1864	19.2766	19.3939	19.3293	19.2826	19.2182	19.2886	19.3187	19.3196	19.2705	19.2725	CAV1	CAV1	CAV1_HUMAN	Q03135	Q03135	Caveolin-1	SASP	NA	up	NA	21	22	22	21	20	21	20	22	22	22	22	23	22	23	21	23	23	22
		16.3689	16.6101	16.2911	16.2021	16.6028	16.7705	16.7702	16.6855	16.7645	16.7038	17.1996	17.3121	17.3702	17.2038	17.2506	17.3255	17.2618	17.1982	17.0189	17.1064	CAV2	CAV2	CAV2_HUMAN	P51636	P51636	Caveolin-2	NA	NA	NA	NA	7	7	7	8	8	8	7	8	6	7	8	7	8	8	8	8	8	8
		19.8557	19.8196	19.9029	19.9585	19.8696	19.9114	19.803	19.7975	19.8236	19.9447	20.1404	20.2007	20.1896	20.0498	19.9991	20.1132	20.1339	19.9614	19.9319	19.9608	CAVIN1	CAVIN1	CAVN1_HUMAN	Q6NZI2	Q6NZI2	Caveolae-associated protein 1	NA	NA	NA	NA	53	56	57	60	54	55	53	57	58	56	55	58	58	57	56	55	56	55
		15.6997	15.646	15.5841	15.5979	15.7296	15.7726	15.7523	15.7093	15.8025	15.6781	16.3676	16.3575	16.3554	16.3393	16.2808	16.251	16.1571	16.0716	16.1228	16.2066	CAVIN2	CAVIN2	CAVN2_HUMAN	O95810	O95810	Caveolae-associated protein 2	NA	NA	NA	NA	20	22	23	23	23	23	22	23	23	22	22	22	21	22	22	22	22	22
		18.7838	18.6233	18.2302	18.3354	18.607	18.7379	18.6724	18.5557	18.7365	18.8031	18.9327	19.0561	19.0161	19.0158	18.9428	19.01	18.9968	19.0458	18.9461	18.9406	CAVIN3	CAVIN3	CAVN3_HUMAN	Q969G5	Q969G5	Caveolae-associated protein 3	NA	NA	NA	NA	23	23	22	23	23	23	23	23	22	23	23	24	25	24	24	24	24	24
		13.0788	13.5247	13.4866	13.5113	13.6419	13.6714	13.4611	13.4962	13.3314	13.408	13.6681	13.4568	13.5364	13.567	13.4347	13.5086	13.4468	13.5036	13.4232	13.6569	CAPS	CAPS	CAYP1_HUMAN	Q13938	Q13938	Calcyphosin	NA	NA	NA	NA	5	5	5	5	5	5	5	5	5	5	4	5	5	5	4	4	4	4
		18.7803	18.665	18.6064	18.6629	18.6633	18.7125	18.8407	18.7605	18.7898	18.8349	18.895	18.9214	18.8718	18.8433	18.8567	18.8132	18.8832	18.886	18.8237	18.7757	CAPZA1.1	CAPZA1	CAZA1_HUMAN	P52907	P52907	F-actin-capping protein subunit alpha-1	SASP	NA	altered	NA	23	22	23	22	22	22	23	22	22	23	23	23	22	23	22	21	23	23
		18.6906	18.6374	18.173	18.3563	18.5586	18.5607	18.6067	18.6765	18.3665	18.5182	18.4927	18.7536	18.5859	18.7055	18.7062	18.6865	18.7725	18.7711	18.8214	18.6348	CAPZA1	CAPZA1;CAPZA2	CAZA1_HUMAN;CAZA2_HUMAN	P47755;P52907	P52907;P47755	F-actin-capping protein subunit alpha-2	SASP	NA	altered	NA	7	7	6	7	7	7	7	6	7	7	7	6	6	7	6	7	6	6
		17.4263	17.334	17.167	17.1808	17.3366	17.2534	17.3954	17.2715	17.2573	17.3337	17.5665	17.579	17.5666	17.509	17.6033	17.4658	17.5332	17.582	17.4522	17.4933	CAPZA2	CAPZA2	CAZA2_HUMAN	P47755	P47755	F-actin-capping protein subunit alpha-2	SASP	NA	altered	NA	22	23	23	23	23	23	23	23	23	23	21	21	21	20	20	22	21	20
		13.2437	12.6237	11.6895	10.8038	12.7864	12.7937	13.3544	13.4404	13.2805	13.4492	13.667	13.6799	13.6789	13.6466	13.5647	13.7615	14.0878	13.8349	13.482	13.5641	CAPZA3	CAPZA3	CAZA3_HUMAN	Q96KX2	Q96KX2	F-actin-capping protein subunit alpha-3	NA	NA	NA	NA	1	1	0	0	1	2	1	1	2	1	1	1	1	2	2	2	2	1
		12.9624	12.7814	12.982	12.8341	13.0768	12.7026	12.8429	13.0296	12.8	12.7895	12.9193	13.1889	12.7327	13.052	13.055	12.9424	13.1001	13.0628	12.9205	13.2561	C2orf69	C2orf69	CB069_HUMAN	Q8N8R5	Q8N8R5	UPF0565 protein C2orf69	NA	NA	NA	NA	2	4	3	3	3	3	3	3	4	4	2	4	3	3	2	3	3	4
		13.4574	13.4224	13.6205	13.426	13.5853	13.5307	13.6813	13.8321	13.6359	13.7403	13.4616	13.6273	13.4803	13.563	13.274	13.4896	13.5762	13.444	13.3776	13.5238	C2orf76	C2orf76	CB076_HUMAN	Q3KRA6	Q3KRA6	UPF0538 protein C2orf76	NA	NA	NA	NA	4	4	4	4	4	4	4	4	4	4	4	4	5	4	5	4	4	4
		15.6409	15.694	15.688	15.6739	15.6562	15.659	15.5521	15.6323	16.0952	15.8591	15.927	15.7647	15.8317	15.922	15.7052	15.794	15.5666	15.6996	15.7234	15.6589	CAB39L	CAB39L	CB39L_HUMAN	Q9H9S4	Q9H9S4	Calcium-binding protein 39-like	NA	NA	NA	NA	7	6	7	7	8	8	7	8	7	7	6	7	8	7	7	8	7	7
		10.5436	10.1419	9.72447	10.1834	10.2658	10.0906	9.6398	10.5066	10.16	10.0264	10.4956	10.1363	9.96569	10.6405	11.0533	10.1354	10.189	9.30187	10.1023	10.4592	CBARP	CBARP	CBARP_HUMAN	Q8N350	Q8N350	Voltage-dependent calcium channel beta subunit-associated regulatory protein	NA	NA	NA	NA	1	1	0	1	2	1	1	1	1	1	1	2	1	2	1	1	1	1
		13.9481	13.931	13.7994	13.8363	13.8266	13.8983	14.0352	13.8979	13.8375	13.9228	13.7959	13.6274	13.7273	13.4578	13.4781	13.6735	13.3995	13.6026	13.5971	13.5905	CBL	CBL	CBL_HUMAN	P22681	P22681	E3 ubiquitin-protein ligase CBL	NA	NA	NA	NA	17	20	18	18	20	20	19	20	19	20	18	15	16	16	18	18	16	18
		12.713	12.6669	12.6096	12.8015	12.6748	12.6565	12.6324	12.6401	12.7251	12.6044	12.2423	12.3891	12.5694	12.1274	12.4716	12.4237	12.2707	12.3498	12.1888	12.4225	CBLB	CBLB	CBLB_HUMAN	Q13191	Q13191	E3 ubiquitin-protein ligase CBL-B	NA	NA	NA	NA	3	6	6	5	5	5	5	5	3	4	5	4	5	4	3	6	3	4
		12.4303	13.0047	13.0826	13.1524	12.9841	13.1212	12.4561	12.897	13.1651	12.8156	11.6485	12.023	11.7739	11.3675	11.6908	12.3543	11.3043	12.1341	12.2561	12.3138	CBL.1	CBL;CBLB	CBLB_HUMAN;CBL_HUMAN	P22681;Q13191	Q13191;P22681	E3 ubiquitin-protein ligase CBL	NA	NA	NA	NA	1	1	1	1	1	1	1	1	1	1	1	1	1	1	1	1	1	1
		12.5522	12.1395	12.3709	12.4802	12.4252	12.6062	12.6141	12.1431	12.4195	12.3528	12.3284	12.134	12.1814	12.0036	12.2585	12.321	12.2441	12.2872	12.5038	12.6481	CREBBP.1	CREBBP	CBP_HUMAN	Q92793	Q92793	CREB-binding protein	NA	NA	NA	NA	12	10	9	8	8	11	9	11	11	12	9	10	9	9	8	10	8	12
		12.8856	12.7562	12.538	12.7381	12.8064	12.864	12.7395	12.7221	12.7692	12.7393	12.7084	12.801	12.7248	12.7794	12.7473	13.0286	12.7813	12.8096	12.7321	12.8874	CREBBP	CREBBP;EP300	CBP_HUMAN;EP300_HUMAN	Q09472;Q92793	Q92793;Q09472	Histone acetyltransferase p300	NA	NA	NA	NA	6	7	8	7	7	6	7	5	6	6	6	4	5	6	6	7	4	4
		10.9869	10.5768	10.6995	10.5933	10.827	10.6621	10.4188	10.5779	10.6841	10.7932	10.9267	10.548	10.6244	10.6271	10.313	10.7703	10.8752	10.8511	10.663	10.6901	AGTPBP1	AGTPBP1	CBPC1_HUMAN	Q9UPW5	Q9UPW5	Cytosolic carboxypeptidase 1	NA	NA	NA	NA	3	4	2	5	5	4	4	4	4	5	3	5	3	3	3	2	4	4
		15.2538	15.0762	15.0209	15.1149	15.137	15.1627	15.2364	15.1382	15.1124	15.1519	15.089	15.0571	15.0682	15.1336	15.0907	15.1473	15.078	14.9919	15.0864	15.1042	CPD	CPD	CBPD_HUMAN	O75976	O75976	Carboxypeptidase D	NA	NA	NA	NA	52	55	56	53	55	58	52	52	56	57	53	51	51	49	51	53	52	54
		14.9566	14.876	14.8687	15.0655	14.9444	14.857	14.9786	15.017	14.8877	14.8849	14.2727	14.3586	14.3929	14.3959	14.3314	14.6777	14.589	14.5719	14.7607	14.5926	CPM	CPM	CBPM_HUMAN	P14384	P14384	Carboxypeptidase M	NA	NA	NA	NA	11	13	12	13	10	13	11	13	13	13	8	10	11	9	9	10	11	9
		16.1854	16.2837	16.3336	16.2985	16.3247	16.3412	16.2372	16.4022	16.4411	16.4001	16.3334	16.4091	16.2298	16.1624	16.1144	16.4309	16.2571	16.1567	16.3193	16.3668	CPQ	CPQ	CBPQ_HUMAN	Q9Y646	Q9Y646	Carboxypeptidase Q	SASP	NA	altered	NA	13	12	13	13	12	13	12	12	12	13	11	11	13	12	13	13	12	12
		13.2599	13.2417	13.0596	12.6028	13.1854	13.1442	13.3474	13.3024	13.3399	13.1351	13.1172	13.3484	13.2572	13.2855	13.0755	13.2126	13.5274	13.3644	13.5105	13.3591	CPZ	CPZ	CBPZ_HUMAN	Q66K79	Q66K79	Carboxypeptidase Z	NA	NA	NA	NA	7	6	8	8	7	7	6	8	9	7	6	5	8	6	6	7	7	8
		18.3889	18.3997	18.4427	18.3594	18.363	18.3406	18.4223	18.4996	18.584	18.6085	18.5314	18.6552	18.5379	18.4712	18.4388	18.4967	18.4402	18.5415	18.3892	18.4672	CBR1.1	CBR1	CBR1_HUMAN	P16152	P16152	Carbonyl reductase [NADPH] 1	SASP	NA	altered	NA	25	26	27	26	26	27	27	26	27	27	25	25	26	26	26	25	26	26
		18.8264	18.9143	19.0111	19.0913	18.8647	18.7353	18.8272	19.021	18.9843	19.04	18.983	19.0553	18.953	18.8856	18.8987	18.8301	18.9221	18.7229	18.6116	18.6752	CBR1	CBR1;CBR3	CBR1_HUMAN;CBR3_HUMAN	O75828;P16152	P16152;O75828	Carbonyl reductase [NADPH] 3	SASP	NA	altered;up	NA	4	4	4	4	4	4	4	4	4	4	4	4	4	4	4	4	4	4
		15.7587	15.7011	15.708	15.671	15.781	15.8198	15.892	15.6819	15.9176	15.8552	15.6218	15.8883	15.748	15.5773	15.6502	15.6587	15.7511	15.7816	15.6021	15.7484	CBR3	CBR3	CBR3_HUMAN	O75828	O75828	Carbonyl reductase [NADPH] 3	SASP	NA	up	NA	22	22	21	20	23	21	22	22	23	23	20	21	21	20	22	23	20	22
		11.3883	11.8644	11.4717	11.3856	11.4315	11.7401	11.7145	11.9543	11.8145	11.4919	11.6081	11.6976	11.759	11.7931	11.7255	11.666	11.6028	11.7201	11.5868	11.693	CBR4	CBR4	CBR4_HUMAN	Q8N4T8	Q8N4T8	Carbonyl reductase family member 4	NA	NA	NA	NA	3	4	3	4	4	4	3	3	4	3	4	4	4	4	4	4	4	4
		15.522	15.5802	15.4189	15.6484	15.5641	15.2867	15.434	15.3891	15.423	15.5478	15.6127	15.7276	15.689	15.5856	15.7399	15.5352	15.4393	15.4596	15.3715	15.4194	CBS	CBS;CBSL	CBSL_HUMAN;CBS_HUMAN	P0DN79;P35520	P0DN79;P35520	Cystathionine beta-synthase-like protein	NA	NA	NA	NA	23	23	23	24	23	24	24	25	25	26	22	23	24	23	22	25	22	23
		12.1802	12.4414	12.4459	12.3931	12.2293	12.3936	12.3531	12.3211	12.1935	12.4394	12.398	12.4899	12.3202	12.426	12.2329	12.3031	12.1576	11.9036	12.2039	12.3176	CBWD1.1	CBWD1	CBWD1_HUMAN	Q9BRT8	Q9BRT8;Q8IUF1	COBW domain-containing protein 1	SASP	NA	up	NA	2	2	3	2	3	2	3	2	3	2	2	2	2	3	2	3	3	2
		13.1018	12.9646	13.1152	13.2721	13.0679	13.078	13.2141	13.1866	13.125	13.0583	13.1438	13.1366	13.2781	13.2019	13.0245	13.1364	13.0939	13.0758	13.1946	13.2558	CBWD1	CBWD1;CBWD6	CBWD1_HUMAN;CBWD6_HUMAN	Q4V339;Q9BRT8	Q9BRT8;Q8IUF1;Q5JTY5;Q5RIA9;Q4V339	COBW domain-containing protein 6	SASP	NA	up	NA	9	8	8	9	9	9	9	8	9	9	8	8	9	9	7	9	8	8
		14.6834	15.1468	14.8967	15.0629	14.9803	14.7363	14.8454	14.9255	14.9557	15.0754	14.5912	14.8519	14.6418	14.905	14.733	15.0337	14.8322	14.8023	15.0156	15.0144	CBX1	CBX1	CBX1_HUMAN	P83916	P83916	Chromobox protein homolog 1	NA	NA	NA	NA	9	9	9	9	9	10	9	9	9	10	9	8	10	10	10	10	9	9
		13.0686	13.1096	13.8637	13.2017	13.267	13.4781	13.093	13.1651	13.8363	13.7322	13.5527	13.6687	13.7014	13.7628	13.6441	13.2983	13.7013	13.6573	13.6653	13.6386	CBX1.1	CBX1;CBX3	CBX1_HUMAN;CBX3_HUMAN	P83916;Q13185	P83916;Q13185	Chromobox protein homolog 1	SASP	NA	altered	NA	6	6	6	6	6	6	6	6	6	6	6	6	6	6	6	6	5	6
		16.3129	16.3956	16.146	16.3103	16.3136	16.2225	16.4435	16.2899	16.4136	16.4922	16.3402	16.4266	16.4041	16.2602	16.2029	16.4577	16.2041	16.2951	16.2678	16.3081	CBX3.1	CBX3	CBX3_HUMAN	Q13185	Q13185	Chromobox protein homolog 3	SASP	NA	altered	NA	11	12	10	11	11	11	10	11	9	11	11	11	11	10	10	10	12	11
		12.8383	12.6671	12.4623	12.3211	12.578	12.5514	12.5902	12.2713	12.2644	12.7701	12.5465	13.4719	13.0464	13.1583	13.218	13.2471	13.0184	13.3994	13.3266	13.3192	CBX3	CBX3;CBX5	CBX3_HUMAN;CBX5_HUMAN	P45973;Q13185	Q13185;P45973	Chromobox protein homolog 5	SASP	NA	altered;down	NA	1	1	1	1	1	1	1	1	1	1	1	1	1	1	1	1	1	1
		11.6742	11.7861	11.7496	11.7403	11.9397	11.8104	11.8977	11.9907	11.9733	11.8766	11.9242	12.1306	12.1042	11.7561	12.0102	11.616	11.6579	11.9202	11.6222	11.8239	CBX4	CBX4	CBX4_HUMAN	O00257	O00257	E3 SUMO-protein ligase CBX4	NA	NA	NA	NA	4	4	4	4	5	3	5	5	5	5	3	3	3	3	2	2	3	2
		16.0748	16.0195	16.185	16.0809	16.053	16.0464	16.0363	16.101	16.0596	16.1317	15.9699	15.9763	15.9504	15.9947	15.8378	16.0809	15.9763	15.9755	15.9532	16.036	CBX5	CBX5	CBX5_HUMAN	P45973	P45973	Chromobox protein homolog 5	SASP	NA	down	NA	14	15	16	15	17	17	15	14	16	16	15	16	15	16	13	15	16	16
		12.6981	12.9174	13.0584	13.0506	12.8417	12.8432	12.7611	12.6855	12.8342	12.8013	12.5529	12.5817	12.4368	12.6016	12.4956	12.8636	12.6999	12.6294	12.4934	12.4993	CBX6	CBX6	CBX6_HUMAN	O95503	O95503	Chromobox protein homolog 6	NA	NA	NA	NA	4	5	5	5	5	5	4	5	5	5	5	4	4	5	5	5	4	4
		10.6026	10.803	10.6327	10.7293	10.8201	10.6467	10.9212	10.8191	10.7916	10.7278	10.8544	10.7646	10.9004	10.4069	10.8653	11.3691	11.0385	10.6843	10.7133	10.5591	CBX7	CBX7	CBX7_HUMAN	O95931	O95931	Chromobox protein homolog 7	NA	NA	NA	NA	1	1	1	1	1	1	1	1	1	1	1	1	1	1	1	1	1	1
		13.1212	12.9936	12.835	12.9715	13.1167	13.1644	13.2737	13.1248	13.159	12.9867	13.2867	13.1247	13.0695	13.0609	13.1842	13.2757	13.1397	13.2036	13.078	12.984	CBX8	CBX8	CBX8_HUMAN	Q9HC52	Q9HC52	Chromobox protein homolog 8	NA	NA	NA	NA	4	4	4	4	4	4	4	4	4	4	4	4	4	4	3	4	4	4
		12.4022	12.4456	12.6039	12.2938	12.1219	12.3705	12.1465	12.2963	12.2308	12.2691	12.5656	12.324	12.3264	12.312	12.4103	12.4667	12.3476	12.4444	12.5259	12.5832	CBY1	CBY1	CBY1_HUMAN	Q9Y3M2	Q9Y3M2	Protein chibby homolog 1	NA	NA	NA	NA	3	3	2	3	3	3	3	3	3	3	2	3	3	3	3	3	2	2
		13.0728	12.9338	12.512	12.7624	12.6954	12.73	12.9234	12.8252	12.7617	12.7368	12.8906	12.9659	12.9526	12.8342	12.8856	12.8429	12.9331	12.8834	12.9257	12.775	C3orf38	C3orf38	CC038_HUMAN	Q5JPI3	Q5JPI3	Uncharacterized protein C3orf38	NA	NA	NA	NA	15	12	13	12	13	14	12	15	13	15	14	12	13	13	13	14	11	12
		12.7907	12.9487	13.1055	13.2474	13.1971	12.76	13.0095	12.8027	12.8948	13.0542	12.7241	12.9274	12.94	12.7549	12.8621	12.6423	12.5467	12.865	12.7331	12.8105	CCDC115	CCDC115	CC115_HUMAN	Q96NT0	Q96NT0	Coiled-coil domain-containing protein 115	NA	NA	NA	NA	3	2	3	3	3	2	3	3	3	3	3	3	3	3	3	3	3	2
		11.6194	11.1368	11.3061	11.5948	11.424	11.5212	11.6998	11.6096	11.2473	11.771	11.8704	11.5026	11.2066	11.4714	11.7128	11.8795	11.8908	11.5807	11.6658	11.6701	CCDC117	CCDC117	CC117_HUMAN	Q8IWD4	Q8IWD4	Coiled-coil domain-containing protein 117	NA	NA	NA	NA	3	4	3	2	4	3	3	4	3	4	3	3	3	4	4	4	3	4
		15.1314	15.1977	14.9884	15.0364	14.9559	15.169	15.084	15.251	15.1683	15.1351	15.0809	15.0923	15.1075	14.8509	14.9281	15.1348	15.1249	15.1619	14.9826	15.1533	CCDC124	CCDC124	CC124_HUMAN	Q96CT7	Q96CT7	Coiled-coil domain-containing protein 124	NA	NA	NA	NA	19	18	18	18	19	20	21	19	19	20	21	19	21	21	21	20	20	20
		12.9766	12.7805	12.7525	12.7353	12.5611	12.8035	12.7918	13.08	12.9823	12.9943	12.8555	13.2074	12.9507	13.2831	13.1191	13.2918	13.3052	13.4915	13.4741	13.5475	CCDC127	CCDC127	CC127_HUMAN	Q96BQ5	Q96BQ5	Coiled-coil domain-containing protein 127	NA	NA	NA	NA	5	4	6	6	4	6	4	6	5	6	6	5	6	6	5	5	5	4
		11.2095	11.5662	11.1355	11.3873	11.4202	10.8961	11.1068	11.2871	11.211	11.5564	11.0469	11.0738	11.1845	10.7286	10.7166	11.3439	10.3868	11.0288	11.3414	11.1612	CCDC130	CCDC130	CC130_HUMAN	P13994	P13994	Coiled-coil domain-containing protein 130	NA	NA	NA	NA	1	2	2	2	2	2	2	2	2	2	1	0	2	2	1	3	1	2
		13.0505	12.9493	12.8245	12.7848	12.9654	12.9606	12.9822	12.9096	12.9522	13.0806	12.7351	12.5501	12.7245	12.3554	12.6912	12.7241	12.3865	12.5869	12.7054	12.7552	CCDC134	CCDC134	CC134_HUMAN	Q9H6E4	Q9H6E4	Coiled-coil domain-containing protein 134	NA	NA	NA	NA	7	8	7	7	8	8	7	8	9	7	6	6	4	7	4	5	7	6
		12.9547	12.9985	12.8863	13.0323	13.1203	12.947	13.095	13.0956	13.1759	13.0283	13.2584	13.1531	13.1834	13.04	12.9615	13.1556	13.0091	12.9617	12.753	12.8941	CCDC137	CCDC137	CC137_HUMAN	Q6PK04	Q6PK04	Coiled-coil domain-containing protein 137	NA	NA	NA	NA	10	10	9	11	10	10	11	11	10	11	11	9	11	11	9	10	11	10
		11.9757	12.1176	12.1536	12.264	12.1574	11.7526	11.922	11.9388	12.1654	11.9035	12.1309	12.0265	11.9127	12.0313	11.8692	11.784	11.7488	11.6742	11.7911	11.7284	CCDC167	CCDC167	CC167_HUMAN	Q9P0B6	Q9P0B6	Coiled-coil domain-containing protein 167	NA	NA	NA	NA	1	1	1	1	1	1	1	1	1	1	1	1	1	1	1	1	1	1
		12.2824	12.221	11.7459	11.8968	11.8144	12.319	12.3289	11.96	12.1636	11.9119	12.2267	12.3465	12.3528	11.9411	12.1319	12.2834	12.0924	12.2318	12.4635	12.3819	CCDC174	CCDC174	CC174_HUMAN	Q6PII3	Q6PII3	Coiled-coil domain-containing protein 174	NA	NA	NA	NA	4	4	4	4	4	5	3	5	4	5	4	4	4	4	4	4	3	4
		11.9736	11.9465	11.9311	11.8124	12.0146	11.9529	12.1707	11.891	11.8627	11.9982	12.0368	11.9813	11.9613	11.8884	11.879	11.8937	11.8741	11.8622	11.906	12.0219	CCDC186	CCDC186	CC186_HUMAN	Q7Z3E2	Q7Z3E2	Coiled-coil domain-containing protein 186	NA	NA	NA	NA	12	13	13	15	12	14	13	14	15	15	13	11	14	14	12	13	10	13
		11.9447	12.2245	12.2729	12.0401	12.0796	12.1527	12.0517	12.1151	12.1455	11.5869	11.8149	11.6826	12.0868	11.9921	11.8637	11.9836	11.8031	12.0578	11.8268	11.8047	CCDC28A	CCDC28A	CC28A_HUMAN	Q8IWP9	Q8IWP9	Coiled-coil domain-containing protein 28A	NA	NA	NA	NA	3	3	4	3	4	4	3	4	4	4	4	3	3	4	3	4	3	3
		10.9153	11.035	10.7113	7.41096	10.0142	8.88738	10.0792	11.0694	9.67481	10.7683	11.0754	10.8399	10.831	10.9126	9.89416	9.48283	10.0238	10.8428	10.3239	10.4686	CCDC28B	CCDC28B	CC28B_HUMAN	Q9BUN5	Q9BUN5	Coiled-coil domain-containing protein 28B	NA	NA	NA	NA	1	1	1	0	0	0	0	1	0	1	1	1	1	1	0	0	0	1
		14.4269	14.1698	14.1054	14.1362	14.2545	14.3013	14.3924	14.328	14.2897	14.3148	14.4041	14.409	14.3769	14.3563	14.4153	14.3949	14.316	14.2879	14.2725	14.3133	TMEM30A	TMEM30A	CC50A_HUMAN	Q9NV96	Q9NV96;Q3MIR4	Cell cycle control protein 50A	NA	NA	NA	NA	15	16	17	17	16	15	16	16	17	17	16	17	15	16	15	17	16	17
		12.2234	12.2816	12.4484	12.0869	12.2546	12.165	12.3182	12.1572	12.3116	12.4768	12.1073	12.3604	12.2874	12.1819	12.2767	12.2788	12.1195	12.1337	12.24	12.1318	CCDC71L	CCDC71L	CC71L_HUMAN	Q8N9Z2	Q8N9Z2	Coiled-coil domain-containing protein 71L	NA	NA	NA	NA	5	5	5	5	5	4	5	5	5	5	3	5	3	4	4	5	4	4
		13.1248	13.4416	13.6141	13.6575	13.2034	13.4895	13.161	13.4741	12.9813	13.0376	13.0293	13.2782	13.162	13.0078	13.0103	12.8376	12.6152	12.7257	12.9843	12.8814	CCDC90B	CCDC90B	CC90B_HUMAN	Q9GZT6	Q9GZT6	Coiled-coil domain-containing protein 90B, mitochondrial	NA	NA	NA	NA	6	6	5	7	6	7	7	7	6	6	5	3	7	6	6	3	5	5
		15.787	15.7139	15.683	15.7435	15.7021	15.796	15.8345	15.7322	15.7419	15.7555	15.6701	15.6208	15.6565	15.6267	15.61	15.7602	15.6073	15.6478	15.5788	15.6973	CCAR1	CCAR1	CCAR1_HUMAN	Q8IX12	Q8IX12	Cell division cycle and apoptosis regulator protein 1	NA	NA	NA	NA	52	58	58	58	54	57	53	55	54	59	51	48	55	52	55	52	56	57
		16.4551	16.4627	16.3817	16.4848	16.5002	16.5851	16.5711	16.5422	16.5494	16.5155	16.4303	16.3597	16.3862	16.2899	16.2852	16.4242	16.3472	16.3312	16.3409	16.3581	CCAR2	CCAR2	CCAR2_HUMAN	Q8N163	Q8N163	Cell cycle and apoptosis regulator protein 2	NA	NA	NA	NA	34	37	37	37	34	36	36	36	39	39	37	35	36	38	34	38	36	36
		13.4044	14.0155	13.8888	14.3771	14.0633	13.9645	13.8141	14.0749	14.0847	13.9421	12.6761	12.563	12.9458	10.1017	12.3267	13.1504	12.767	13.0453	12.7136	12.8398	CCBE1	CCBE1	CCBE1_HUMAN	Q6UXH8	Q6UXH8	Collagen and calcium-binding EGF domain-containing protein 1	NA	NA	NA	NA	3	2	3	2	2	3	3	3	3	3	1	1	1	0	1	2	2	2
		13.6684	13.9661	13.5307	13.6376	13.7663	13.6362	13.6559	13.6216	13.795	13.8973	13.3829	13.3013	13.5065	13.2719	13.15	13.4918	13.2702	12.9962	13.3006	13.2731	CCDC12	CCDC12	CCD12_HUMAN	Q8WUD4	Q8WUD4	Coiled-coil domain-containing protein 12	NA	NA	NA	NA	6	7	7	7	7	6	7	7	7	7	6	6	7	7	6	7	7	6
		15.2005	15.0663	15.0965	15.0429	15.1613	15.2731	15.1173	15.13	15.2047	15.0959	15.1748	15.0561	15.2432	14.9788	14.9572	15.0615	15.0187	15.0037	15.0672	15.0465	CCDC22	CCDC22	CCD22_HUMAN	O60826	O60826	Coiled-coil domain-containing protein 22	NA	NA	NA	NA	25	28	31	29	30	29	29	30	30	29	27	27	29	30	28	29	26	30
		14.8581	14.8229	14.7242	14.9001	14.8574	14.704	14.8797	14.9584	14.8224	14.7501	14.6657	14.7483	14.6993	14.6248	14.7469	14.849	14.5932	14.6717	14.8042	14.8666	CCDC25	CCDC25	CCD25_HUMAN	Q86WR0	Q86WR0	Coiled-coil domain-containing protein 25	NA	NA	NA	NA	14	13	12	13	14	14	14	14	13	15	14	15	14	12	12	12	13	13
		14.1913	14.2052	14.1692	14.2939	14.148	14.3082	14.1089	14.1822	14.227	14.1895	14.0825	14.1599	14.2054	14.1262	13.9677	14.1617	14.0701	13.9503	13.9886	14.0507	CCDC43	CCDC43	CCD43_HUMAN	Q96MW1	Q96MW1	Coiled-coil domain-containing protein 43	NA	NA	NA	NA	7	6	7	6	7	7	7	8	9	9	8	6	7	8	8	7	8	8
		15.6828	15.4987	15.2746	15.4097	15.5058	15.5084	15.6376	15.5778	15.4637	15.6316	15.7017	15.6709	15.705	15.7405	15.7133	15.6873	15.7239	15.7336	15.7197	15.7345	CCDC47	CCDC47	CCD47_HUMAN	Q96A33	Q96A33	Coiled-coil domain-containing protein 47	NA	NA	NA	NA	42	43	42	43	44	48	46	42	47	46	47	46	47	48	47	46	47	46
		16.4104	16.3749	16.3493	16.4943	16.3579	16.5363	16.436	16.4659	16.5979	16.5129	16.5367	16.3522	16.4807	16.3544	16.3504	16.4651	16.1847	16.3546	16.1905	16.2388	CCDC50	CCDC50	CCD50_HUMAN	Q8IVM0	Q8IVM0	Coiled-coil domain-containing protein 50	NA	NA	NA	NA	19	20	19	18	18	20	18	19	20	20	20	18	18	19	18	19	19	20
		13.3713	13.3566	13.6621	13.6464	12.99	13.8081	13.6195	13.5273	13.724	13.2051	13.4611	13.056	13.5226	13.0679	12.9232	12.9688	12.8398	12.691	12.7821	12.5927	CCDC58	CCDC58	CCD58_HUMAN	Q4VC31	Q4VC31	Coiled-coil domain-containing protein 58	NA	NA	NA	NA	5	5	5	5	5	5	4	4	4	4	4	3	4	4	4	4	4	4
		9.97357	12.3222	12.8468	12.8483	12.5071	12.6153	12.5563	12.3996	12.6371	12.6932	12.6677	12.8924	12.6864	12.5442	12.6226	12.5914	12.1121	12.6182	12.6534	12.395	CCDC66	CCDC66;MAP4K4;TNIK	CCD66_HUMAN;M4K4_HUMAN;TNIK_HUMAN	A2RUB6;O95819;Q9UKE5	A2RUB6;O95819;Q9UKE5	Coiled-coil domain-containing protein 66	SASP	NA	up	NA	0	1	1	1	1	1	1	1	1	1	1	1	1	1	1	1	1	1
		15.7965	15.9129	15.9459	15.8879	15.7324	15.9138	16.0823	15.7782	15.78	15.8615	15.9257	15.4788	15.7837	15.8109	15.8617	15.7982	15.7983	15.6349	15.6315	15.6723	CCDC71	CCDC71	CCD71_HUMAN	Q8IV32	Q8IV32	Coiled-coil domain-containing protein 71	NA	NA	NA	NA	5	7	5	8	6	7	6	6	8	7	4	5	5	5	2	4	3	6
		12.2662	12.3617	12.4587	12.6134	12.4924	12.2738	12.3129	12.3601	12.449	12.2398	12.4854	12.6211	12.5431	12.6755	12.4933	12.3073	12.6163	12.2711	12.3802	12.5233	CCDC80	CCDC80	CCD80_HUMAN	Q76M96	Q76M96	Coiled-coil domain-containing protein 80	NA	NA	NA	NA	12	13	14	12	12	12	13	14	14	13	11	15	13	11	15	10	13	14
		11.2283	10.8934	10.8634	11.272	11.0486	11.2686	11.2557	11.0981	10.8839	11.262	11.1522	10.6788	11.2814	11.4864	11.0526	11.1104	11.3707	11.225	11.3568	11.3776	CCDC82	CCDC82	CCD82_HUMAN	Q8N4S0	Q8N4S0	Coiled-coil domain-containing protein 82	NA	NA	NA	NA	2	3	5	2	3	4	5	5	2	3	5	2	4	4	3	5	3	5
		13.4162	13.282	13.4288	12.9791	13.2542	13.4339	13.4315	13.2765	13.3925	13.1467	13.3594	13.3783	13.3854	13.3652	13.4311	13.4542	13.3737	13.3676	13.4763	13.3779	CCDC86	CCDC86	CCD86_HUMAN	Q9H6F5	Q9H6F5	Coiled-coil domain-containing protein 86	NA	NA	NA	NA	11	11	9	11	10	11	12	11	12	13	12	11	13	13	11	13	11	11
		12.5837	12.3656	12.738	12.3924	12.6153	12.7531	12.4413	12.6066	12.5374	12.5027	12.4871	12.5053	12.5126	12.5619	12.6122	12.4756	12.3902	12.4438	12.626	12.5457	CCDC91	CCDC91	CCD91_HUMAN	Q7Z6B0	Q7Z6B0	Coiled-coil domain-containing protein 91	NA	NA	NA	NA	6	4	5	7	4	7	6	6	7	7	6	7	7	7	5	6	6	6
		13.7817	13.6758	13.8577	13.8072	13.8788	13.9189	13.8481	13.8703	13.9625	13.5506	13.6477	13.5178	13.6766	13.4696	13.3057	13.6703	13.3688	13.3662	13.4884	13.5123	CCDC92	CCDC92	CCD92_HUMAN	Q53HC0	Q53HC0	Coiled-coil domain-containing protein 92	NA	NA	NA	NA	9	9	9	9	9	9	9	9	9	9	8	9	9	9	7	9	8	8
		15.7777	15.7509	15.8479	15.8796	15.8765	15.9163	15.8755	15.8697	15.9617	15.891	15.9459	15.916	15.9277	15.851	15.9177	15.9071	15.7986	15.902	15.8231	15.9265	CCDC93	CCDC93	CCD93_HUMAN	Q567U6	Q567U6	Coiled-coil domain-containing protein 93	NA	NA	NA	NA	41	44	41	43	44	41	43	45	42	44	40	44	43	43	39	43	42	44
		12.9079	13.0838	12.6243	12.8154	12.8519	12.9839	12.897	12.9387	13.0022	12.9622	12.8406	12.6193	12.6972	12.4599	12.5401	12.4565	12.6798	12.3519	12.8309	12.6522	CCDC93.1	CCDC93;IKBIP	CCD93_HUMAN;IKIP_HUMAN	Q567U6;Q70UQ0	Q567U6;Q70UQ0	Coiled-coil domain-containing protein 93	NA	NA	NA	NA	1	1	1	1	1	1	1	1	1	1	1	1	1	1	1	1	1	1
		13.7966	13.7644	13.5573	13.7854	13.8993	13.9999	13.8231	13.5549	13.5339	13.8493	14.225	13.9954	13.8574	14.0598	13.6892	14.0548	13.8294	13.8187	13.7851	13.8804	CCDC97	CCDC97	CCD97_HUMAN	Q96F63	Q96F63	Coiled-coil domain-containing protein 97	NA	NA	NA	NA	4	4	5	4	3	4	4	4	5	5	4	3	4	4	3	4	3	4
		13.3423	13.0713	13.1463	13.056	13.1772	13.3903	13.3156	13.2877	13.3555	13.0096	13.4161	13.429	13.4872	13.3918	13.468	13.3161	13.2201	13.2851	13.2282	13.416	CCDC9B	CCDC9B	CCD9B_HUMAN	Q6ZUT6	Q6ZUT6	Coiled-coil domain-containing protein 9B	NA	NA	NA	NA	10	12	11	11	10	12	11	12	12	12	11	10	13	11	12	12	10	11
		12.9139	12.6848	12.5326	12.3189	12.604	12.5865	12.6936	12.6761	12.5641	12.5069	12.7187	12.6215	12.7422	12.3707	12.7254	12.5757	12.4088	12.4971	12.6325	12.3326	CCNDBP1	CCNDBP1	CCDB1_HUMAN	O95273	O95273	Cyclin-D1-binding protein 1	NA	NA	NA	NA	3	3	3	3	3	3	3	3	3	3	2	3	3	3	3	3	2	3
		15.3809	15.386	15.3632	15.3091	15.4555	15.3928	15.4214	15.3755	15.4864	15.2714	15.3542	15.3921	15.4622	15.4236	15.4323	15.4345	15.3499	15.3855	15.2952	15.4581	CCDC6	CCDC6	CCDC6_HUMAN	Q16204	Q16204	Coiled-coil domain-containing protein 6	NA	NA	NA	NA	32	34	35	34	35	35	35	36	37	38	35	33	36	33	33	35	32	37
		10.8314	13.3608	11.2716	13.5804	13.0214	12.7369	12.7299	12.8124	9.82312	13.1706	12.8381	12.3797	12.3175	10.7514	12.3592	12.8061	12.0311	12.0911	12.1713	12.1991	CCDC7	CCDC7;ENOX1	CCDC7_HUMAN;ENOX1_HUMAN	Q8TC92;Q96M83	Q96M83;Q8TC92	Ecto-NOX disulfide-thiol exchanger 1	NA	NA	NA	NA	0	1	0	1	1	1	1	1	0	1	1	1	1	0	1	1	1	1
		11.4135	11.2831	11.7708	11.6801	11.6122	11.8837	11.6089	11.5374	11.5339	11.4646	11.2874	11.6407	11.6189	11.4788	11.5454	11.0378	11.5276	11.5634	11.6103	11.5383	CCDC8	CCDC8	CCDC8_HUMAN	Q9H0W5	Q9H0W5	Coiled-coil domain-containing protein 8	NA	NA	NA	NA	6	7	7	7	5	7	6	7	7	6	6	7	6	6	5	5	6	7
		14.5059	14.3614	14.4716	14.3493	14.5504	14.5416	14.3372	14.4336	14.4963	14.47	14.3611	14.2778	14.2825	14.3053	14.2649	14.3954	14.3002	14.2815	14.3624	14.3884	CCDC9	CCDC9	CCDC9_HUMAN	Q9Y3X0	Q9Y3X0	Coiled-coil domain-containing protein 9	NA	NA	NA	NA	17	19	20	19	17	17	19	19	20	18	17	17	19	17	16	18	16	17
		14.9194	14.784	14.6618	14.647	14.8068	14.9078	14.9359	14.7573	14.9556	15.0112	15.0091	15.0184	14.981	14.9568	15.0218	14.9504	15.0047	15.0868	14.9813	14.9859	HCCS	HCCS	CCHL_HUMAN	P53701	P53701	Holocytochrome c-type synthase	NA	NA	NA	NA	17	16	16	17	16	17	16	16	16	17	17	16	16	16	16	16	16	16
		13.2569	13.1405	13.0853	13.1787	13.1754	13.3462	13.2367	13.2636	13.2854	13.303	13.2132	13.5651	13.4558	13.4329	13.4834	13.3889	13.2361	13.2258	13.4004	13.4288	CCM2	CCM2	CCM2_HUMAN	Q9BSQ5	Q9BSQ5	Cerebral cavernous malformations 2 protein	NA	NA	NA	NA	14	16	14	16	15	16	15	16	16	16	16	14	15	16	15	15	14	14
		10.3499	8.74419	11.4842	11.567	11.2034	11.3791	11.3862	11.6495	10.8807	11.6288	11.7158	12.0174	12.2432	12.2	12.0661	11.871	11.844	12.2041	11.8094	12.286	CCN1	CCN1	CCN1_HUMAN	O00622	O00622	CCN family member 1	NA	NA	NA	NA	0	0	1	1	2	1	2	2	1	2	2	3	3	4	3	2	2	4
		9.61787	11.8257	12.5691	12.2747	11.7585	11.3008	12.0184	9.72477	10.976	10.4724	12.0559	12.1245	11.919	12.1916	12.2108	12.2143	12.1767	12.2252	12.0177	12.2173	CCN2	CCN2	CCN2_HUMAN	P29279	P29279	CCN family member 2	NA	NA	NA	NA	0	2	1	2	1	1	1	0	1	0	1	1	1	2	1	2	1	2
		11.4681	11.5015	11.7078	11.2489	11.1188	11.2847	11.619	11.4921	11.3871	11.5799	11.2466	11.1705	10.9149	11.4064	11.3703	11.316	10.9252	11.3926	10.8787	11.2537	CCN3	CCN3	CCN3_HUMAN	P48745	P48745	CCN family member 3	NA	NA	NA	NA	2	2	2	3	3	1	3	2	2	3	3	1	3	3	3	3	2	3
		11.0742	7.91629	9.01143	8.45406	10.6959	11.4354	9.36298	8.80027	8.80276	9.87107	10.7778	10.8103	10.8902	10.0362	10.2089	8.88466	9.62223	8.83425	10.1821	10.6162	CCNB1	CCNB1	CCNB1_HUMAN	P14635	P14635	G2/mitotic-specific cyclin-B1	NA	NA	NA	NA	0	1	1	1	0	0	1	1	1	0	0	0	0	0	0	1	0	1
		12.0896	11.9983	12.0584	12.0284	12.1834	11.9562	11.9191	12.2082	12.0413	12.0218	11.0768	11.5348	11.9521	11.6487	11.4944	11.8384	11.5322	11.6419	11.6031	11.88	CCNC	CCNC	CCNC_HUMAN	P24863	P24863	Cyclin-C	NA	NA	NA	NA	1	1	1	1	1	1	1	1	1	1	1	1	1	1	1	1	1	1
		13.6731	13.4156	13.2068	12.9963	13.2394	13.2873	13.4719	13.2409	13.1853	13.4548	14.2546	14.3509	14.1939	14.1614	14.2431	13.9937	13.8552	13.901	13.9818	13.9692	CCND1	CCND1	CCND1_HUMAN	P24385	P24385	G1/S-specific cyclin-D1	NA	NA	NA	NA	9	10	7	9	7	10	7	8	7	8	9	9	10	8	8	10	9	9
		10.1547	8.50083	8.86192	8.90468	9.34793	8.79902	8.74514	8.67752	9.43921	9.73666	8.20902	10.0627	9.31798	8.96674	8.88849	9.92024	9.3447	10.9025	10.7728	9.48012	CCND3	CCND3	CCND3_HUMAN	P30281	P30281	G1/S-specific cyclin-D3	NA	NA	NA	NA	0	1	1	1	1	1	1	1	1	1	1	1	1	1	1	1	1	0
		12.7643	12.8781	12.8478	12.6999	12.8346	12.7997	12.8732	12.9797	12.7672	12.7587	12.9307	13.0187	12.8384	13.0748	13.0763	13.0411	12.9679	13.0553	13.0224	13.0151	CCNH	CCNH	CCNH_HUMAN	P51946	P51946	Cyclin-H	NA	NA	NA	NA	10	10	9	11	10	12	12	10	12	11	10	8	12	11	11	11	11	10
		14.5178	14.1337	13.8303	13.9806	14.2899	14.3443	14.3848	14.2243	14.3265	14.1675	14.3803	14.0801	14.2537	14.2056	14.3464	14.222	14.2852	14.3317	14.247	14.4063	CCNK	CCNK	CCNK_HUMAN	O75909	O75909	Cyclin-K	NA	NA	NA	NA	10	11	10	10	10	11	11	11	12	10	11	11	11	11	10	11	10	11
		13.9664	13.9162	13.6895	13.7676	14.0533	13.9449	14.0229	14.0396	14.0272	14.0279	14.1059	14.0344	13.9825	14.0745	13.8724	13.9916	13.7931	14.0196	13.8889	14.0312	CCNL1	CCNL1	CCNL1_HUMAN	Q9UK58	Q9UK58	Cyclin-L1	NA	NA	NA	NA	7	8	7	7	8	8	8	8	8	8	8	8	8	8	8	7	7	8
		12.3042	11.9975	11.8684	11.914	11.9261	12.2104	12.196	12.0688	12.011	11.8071	12.0014	11.8705	12.0117	11.7669	12.0195	12.0586	11.8644	11.954	11.7927	12.1089	CCNL2	CCNL2	CCNL2_HUMAN	Q96S94	Q96S94	Cyclin-L2	NA	NA	NA	NA	4	3	3	3	3	5	4	4	3	4	5	3	5	5	4	5	4	5
		12.6039	12.3945	12.1089	12.2359	12.2123	12.3568	12.4362	12.5563	12.3843	12.337	12.5099	12.5408	12.4976	12.4946	12.5054	12.4413	12.3791	12.4872	12.5061	12.5226	CCNT1	CCNT1	CCNT1_HUMAN	O60563	O60563	Cyclin-T1	NA	NA	NA	NA	11	12	13	11	12	9	11	13	11	13	12	12	13	12	11	11	11	11
		10.8703	12.1686	12.0192	12.311	12.197	12.6119	12.7256	12.1637	12.344	12.5014	12.9435	12.5981	12.9885	12.6889	12.2899	12.7876	12.512	12.2729	12.8857	12.4637	CCNT1.1	CCNT1;CCNT2	CCNT1_HUMAN;CCNT2_HUMAN	O60563;O60583	O60563;O60583	Cyclin-T1	NA	NA	NA	NA	0	2	2	1	2	2	2	2	2	2	2	2	1	1	2	2	1	2
		12.0265	11.9278	11.9452	12.0346	12.1287	12.0458	11.9884	11.9811	12.0001	12.0936	12.4136	12.3321	12.2879	12.0625	12.0133	12.3535	11.9718	12.2605	11.9	12.1333	CCNT2	CCNT2	CCNT2_HUMAN	O60583	O60583	Cyclin-T2	NA	NA	NA	NA	5	6	5	4	3	5	5	6	7	6	6	6	6	4	6	7	5	5
		14.6726	14.4563	14.4767	14.5019	14.5182	14.5768	14.6492	14.5879	14.597	14.5062	14.8987	14.8176	14.9411	14.924	14.9393	14.9552	14.9133	14.6806	14.8249	14.7731	CCNY.1	CCNY	CCNY_HUMAN	Q8ND76	Q8ND76	Cyclin-Y	NA	NA	NA	NA	14	12	13	13	11	12	13	11	12	13	14	15	12	14	14	13	14	14
		11.5445	11.6551	11.2159	11.3991	12.1482	11.9467	11.7576	11.5557	11.8342	12.1255	11.4793	11.5717	11.8682	11.6146	11.159	11.3713	10.8962	10.8094	10.8648	10.9454	CCNY	CCNY;CCNYL1	CCNY_HUMAN;CCYL1_HUMAN	Q8N7R7;Q8ND76	Q8ND76;Q8N7R7;Q5T2Q4	Cyclin-Y-like protein 1	NA	NA	NA	NA	1	1	1	1	1	1	1	1	1	1	1	1	1	1	1	1	1	1
		12.9918	12.7787	12.7972	12.9398	12.9539	12.9833	12.9149	13.0496	13.0313	13.1745	13.5634	13.3305	13.2617	13.4146	13.4838	13.3763	13.2299	13.3347	13.4401	13.4375	CCPG1	CCPG1	CCPG1_HUMAN	Q9ULG6	Q9ULG6	Cell cycle progression protein 1	SASP	NA	up	NA	9	12	14	13	10	11	13	12	12	13	13	13	14	12	11	11	11	12
		14.9766	15.2317	15.3847	15.2806	15.2305	15.1091	14.9963	15.1544	15.0419	15.0503	14.6635	14.7491	14.8131	14.6491	14.4319	14.8576	14.598	14.7026	14.6665	14.7786	CCS	CCS	CCS_HUMAN	O14618	O14618	Copper chaperone for superoxide dismutase	NA	NA	NA	NA	7	7	7	7	7	7	7	7	7	7	7	7	7	7	7	7	7	7
		12.8259	12.6659	12.9181	13.2111	12.8078	12.9508	12.7167	12.7371	12.9076	12.7898	12.8241	12.9111	12.7742	12.7743	12.8879	12.8306	12.2113	12.7745	12.7044	12.5671	CCNYL1	CCNYL1	CCYL1_HUMAN	Q8N7R7	Q8N7R7	Cyclin-Y-like protein 1	NA	NA	NA	NA	7	7	7	7	7	6	6	6	7	7	7	7	7	7	7	6	5	7
		15.3531	15.3064	15.302	15.3979	15.3566	15.3183	15.3482	15.3341	15.353	15.397	15.4705	15.4722	15.4564	15.3736	15.4563	15.4756	15.3862	15.251	15.3251	15.3526	CCZ1	CCZ1;CCZ1B	CCZ1B_HUMAN;CCZ1_HUMAN	P86790;P86791	P86790;P86791	Vacuolar fusion protein CCZ1 homolog B	NA	NA	NA	NA	22	24	27	23	25	26	25	28	29	29	27	25	25	25	24	22	23	23
		11.6314	11.4188	11.0666	11.2511	11.8681	11.8917	12.0014	12.0231	11.9829	11.8911	11.9371	11.8602	12.174	11.615	11.4885	11.8898	11.6848	11.8811	11.8929	11.6021	C4orf33	C4orf33	CD033_HUMAN	Q8N1A6	Q8N1A6	UPF0462 protein C4orf33	NA	NA	NA	NA	3	3	3	3	3	3	3	3	3	3	3	3	3	3	3	3	3	3
		14.5383	14.6927	14.6351	14.6769	14.6485	14.5287	14.6777	14.7481	14.5984	14.7219	14.8995	15.0813	15.0042	15.0039	14.8755	14.934	14.7738	14.7853	14.8742	14.9269	CD109	CD109	CD109_HUMAN	Q6YHK3	Q6YHK3	CD109 antigen	SASP	NA	altered	NA	28	29	30	30	30	30	31	28	30	31	32	31	33	34	31	31	30	33
		11.5342	11.8907	9.67935	12.7135	12.1174	12.1435	11.2114	11.7992	11.8185	11.4038	10.6216	10.6848	11.8462	12.1202	11.8791	11.5201	12.4305	10.8263	10.483	8.33705	CDK11A.1	CDK11A	CD11A_HUMAN	Q9UQ88	Q9UQ88	Cyclin-dependent kinase 11A	NA	NA	NA	NA	2	2	0	1	2	1	2	2	2	2	0	0	1	1	1	1	1	2
		16.2258	16.0805	15.8971	15.9256	15.9639	16.1751	16.1328	16.1224	16.0913	16.012	16.2071	16.1566	16.2036	16.1262	16.1623	16.2547	16.2368	16.2996	16.2882	16.3273	CDK11A	CDK11A;CDK11B	CD11A_HUMAN;CD11B_HUMAN	P21127;Q9UQ88	Q9UQ88;P21127;Q13882	Cyclin-dependent kinase 11B	NA	NA	NA	NA	19	21	19	19	20	20	20	19	19	19	19	19	20	20	20	20	19	18
		14.4744	14.5859	14.7457	14.7482	14.7316	14.4623	14.5659	14.5774	14.5773	14.7369	14.4682	14.5013	14.4056	14.39	14.3022	14.4068	14.4383	14.4331	14.3681	14.547	CDK11B	CDK11B	CD11B_HUMAN	P21127	Q9UQ88;P21127	Cyclin-dependent kinase 11B	NA	NA	NA	NA	6	8	8	7	8	8	7	7	7	8	9	8	8	7	7	8	8	8
		13.3363	13.4677	13.1006	13.1777	13.2191	13.2182	13.0355	13.4207	13.2866	13.2877	13.3646	13.2432	13.2487	13.1748	13.0672	13.1218	12.9353	12.8325	12.8956	12.7904	CDC123	CDC123	CD123_HUMAN	O75794	O75794	Cell division cycle protein 123 homolog	NA	NA	NA	NA	7	7	7	8	8	8	8	8	8	8	6	7	7	6	6	6	5	6
		17.8881	17.9879	17.6637	17.8482	17.9952	17.6492	17.9121	17.8402	17.81	17.9909	17.6884	18.0272	17.8714	17.826	17.9255	17.9109	17.8261	17.8613	17.84	17.9039	CD151	CD151	CD151_HUMAN	P48509	P48509	CD151 antigen	SASP	NA	down	NA	7	9	8	8	9	9	8	7	9	8	9	9	9	9	9	8	9	9
		17.6724	17.79	17.6693	17.9021	17.6505	17.3883	17.6527	17.7183	17.7811	17.6874	17.0727	17.509	17.5313	17.5866	17.5597	17.4975	17.6023	17.4687	17.4229	17.508	ALCAM	ALCAM	CD166_HUMAN	Q13740	Q13740	CD166 antigen	SASP	NA	altered	NA	35	35	33	33	32	34	34	32	35	35	26	29	28	30	32	29	28	31
		15.6814	15.6568	15.5218	15.6546	15.5813	15.648	15.7796	15.6211	15.6453	15.5366	15.6302	15.7314	15.6072	15.6105	15.6836	15.6773	15.6533	15.7487	15.6874	15.6205	CD248	CD248	CD248_HUMAN	Q9HCU0	Q9HCU0	Endosialin	SAASP/SASP	NA	down	up	15	15	14	13	14	15	15	15	15	15	15	14	15	15	13	13	14	15
		13.5489	13.3622	13.2985	13.3384	13.2016	13.2949	13.7132	13.521	13.5107	13.736	13.405	13.7074	13.4187	13.5664	13.4938	13.5758	13.7449	13.5537	13.6992	13.5526	CD276	CD276	CD276_HUMAN	Q5ZPR3	Q5ZPR3	CD276 antigen	NA	NA	NA	NA	8	10	11	9	10	8	8	9	10	10	8	9	9	9	9	9	9	8
		15.2418	15.0954	15.1047	15.0596	15.1696	15.1941	15.1549	15.2323	15.1911	15.2143	15.3428	15.2829	15.3053	15.272	15.2732	15.2446	15.1943	15.1873	15.189	15.2016	CD2AP	CD2AP	CD2AP_HUMAN	Q9Y5K6	Q9Y5K6	CD2-associated protein	SASP	NA	down	NA	32	35	34	31	34	34	35	33	36	34	36	33	35	35	36	35	33	35
		13.9947	14.2416	14.3012	14.2143	14.0932	14.1965	14.1645	14.2756	14.1967	14.1607	13.9655	13.9855	14.0425	13.8368	13.7829	14.0891	13.8002	14.0207	13.841	13.9491	CD2BP2	CD2BP2	CD2B2_HUMAN	O95400	O95400	CD2 antigen cytoplasmic tail-binding protein 2	NA	NA	NA	NA	7	8	8	8	6	8	8	8	8	7	7	6	6	7	7	7	6	7
		12.0929	10.9263	10.5598	10.9045	10.7981	10.2784	11.3164	10.93	10.5753	10.442	11.7289	11.8734	11.629	11.3612	11.2029	11.8013	11.567	11.4741	11.1304	11.6003	CD302	CD302	CD302_HUMAN	Q8IX05	Q8IX05	CD302 antigen	NA	NA	NA	NA	2	2	1	2	2	2	2	2	2	2	2	2	2	2	2	2	2	2
		13.0068	12.8672	13.0821	12.9792	13.037	13.1433	13.1311	12.8543	13.2294	13.1746	13.1495	13.1609	13.192	13.21	13.2528	13.2245	13.1306	13.0975	13.1721	13.1564	CDC37L1	CDC37L1	CD37L_HUMAN	Q7L3B6	Q7L3B6	Hsp90 co-chaperone Cdc37-like 1	NA	NA	NA	NA	9	9	8	8	9	8	10	8	6	9	10	8	10	10	9	10	8	10
		18.9446	18.9724	19.1984	19.1252	19.0763	18.998	19.0383	18.9809	19.115	19.2577	19.1485	19.1931	19.0458	18.9635	18.9081	19.0911	19.0127	18.97	19.0214	19.095	CD44	CD44	CD44_HUMAN	P16070	P16070	CD44 antigen	SASP	NA	altered	NA	20	20	20	20	21	20	20	22	21	20	20	20	21	22	20	21	21	21
		16.915	17.1352	17.5077	17.383	17.225	17.1732	17.2717	17.2613	17.2592	17.3287	17.0685	17.0496	17.1128	16.828	16.862	17.1979	16.4817	16.7841	16.7524	16.7491	CD47	CD47	CD47_HUMAN	Q08722	Q08722	Leukocyte surface antigen CD47	NA	NA	NA	NA	3	3	3	3	3	3	3	3	3	3	3	3	3	3	3	3	3	3
		18.1095	18.0417	17.7375	18.1181	18.0028	17.6735	18.1697	17.4091	17.4334	18.2164	18.5053	18.9024	18.551	18.4418	18.4332	18.0871	18.1193	18.6196	18.3319	18.3506	CD59	CD59	CD59_HUMAN	P13987	P13987	CD59 glycoprotein	SASP	NA	altered	NA	8	8	6	7	8	7	8	7	7	7	8	8	8	8	8	8	8	8
		17.5056	17.8224	18.0719	17.5385	17.7624	17.662	17.6227	17.8238	18.2446	18.2137	17.6315	17.8526	17.6528	17.5253	17.3851	17.7588	17.6265	17.5151	17.7382	17.7584	CD63	CD63	CD63_HUMAN	P08962	P08962	CD63 antigen	SASP	NA	down	NA	7	8	8	8	7	8	8	8	8	8	8	8	8	8	8	8	8	8
		12.5441	12.608	12.2055	12.0855	12.2688	12.412	12.5474	12.7915	12.4557	12.6961	12.7728	13.0308	12.8548	12.1667	12.5644	13.098	12.9891	12.4484	12.7373	12.8473	CD68	CD68	CD68_HUMAN	P34810	P34810	Macrosialin	NA	NA	NA	NA	2	2	2	2	2	2	2	2	2	2	2	2	2	2	2	2	2	2
		16.3805	16.9714	16.851	16.6138	17.183	16.7491	16.5464	16.538	16.8385	16.9903	16.8224	17.1622	17.1577	16.8022	16.9969	17.1429	16.9891	16.8683	16.9587	17.1755	CD81	CD81	CD81_HUMAN	P60033	P60033	CD81 antigen	SASP	NA	altered	NA	7	7	7	7	6	7	7	7	7	7	7	7	7	7	7	7	7	7
		14.1265	14.1436	13.9301	14.1015	14.3094	14.0679	13.9951	14.1194	13.9864	13.9633	14.1186	14.1531	14.0664	13.9525	14.0597	14.0946	13.8691	13.8513	14.1115	13.9121	CD82	CD82	CD82_HUMAN	P27701	P27701	CD82 antigen	NA	NA	NA	NA	5	6	6	6	6	6	5	6	5	6	6	6	5	6	5	5	4	5
		15.455	15.5769	15.3337	15.6864	15.364	15.5388	15.4009	15.8659	15.969	15.7369	15.2648	15.4679	15.2932	15.4628	15.5274	15.5486	15.4017	15.4022	15.473	15.5177	CD9	CD9	CD9_HUMAN	P21926	P21926	CD9 antigen	SASP	NA	down	NA	6	6	6	6	6	6	6	6	6	6	6	6	6	6	6	6	6	6
		15.1155	15.0399	14.8362	15.1353	15.1789	15.1587	15.3532	15.3174	15.4121	15.0677	15.3377	15.3426	15.365	15.5177	15.4017	15.2985	15.0427	15.4996	15.5447	15.5567	CD99	CD99	CD99_HUMAN	P14209	P14209	CD99 antigen	SASP	NA	down	NA	5	5	4	5	5	5	5	5	5	5	5	5	5	5	5	3	5	5
		12.0137	12.3728	11.7531	12.0352	12.076	12.1884	12.1087	12.0621	12.2908	12.1907	12.1245	12.2678	12.2477	12.0302	12.1507	12.008	12.0133	11.9798	12.031	11.9584	CDAN1	CDAN1	CDAN1_HUMAN	Q8IWY9	Q8IWY9	Codanin-1	NA	NA	NA	NA	7	8	8	8	7	8	6	8	7	7	7	6	9	7	8	7	6	6
		14.5138	14.4637	14.3898	14.3489	14.4151	14.4798	14.489	14.4747	14.4037	14.5125	14.6595	14.6443	14.6693	14.5958	14.6223	14.692	14.5384	14.6071	14.6147	14.6592	CDC16	CDC16	CDC16_HUMAN	Q13042	Q13042	Cell division cycle protein 16 homolog	NA	NA	NA	NA	19	21	20	21	21	18	22	20	24	22	24	19	18	24	22	22	21	23
		14.0961	14.0636	13.9371	14.1224	14.0716	14.0905	14.0036	14.0928	14.0705	13.9063	13.9194	13.8244	13.9713	13.7549	13.765	13.9273	13.7332	13.8448	13.7335	13.7123	CDC23	CDC23	CDC23_HUMAN	Q9UJX2	Q9UJX2	Cell division cycle protein 23 homolog	NA	NA	NA	NA	20	22	22	22	23	19	21	20	23	25	24	22	22	22	22	23	22	22
		10.9063	10.6162	9.68185	10.1431	10.0328	9.65106	11.1761	10.7122	10.7588	10.3571	11.4669	10.9896	10.5058	11.239	10.9192	10.3704	10.9624	11.3055	10.7437	10.7263	CDC26	CDC26	CDC26_HUMAN	Q8NHZ8	Q8NHZ8	Anaphase-promoting complex subunit CDC26	NA	NA	NA	NA	2	2	1	1	2	1	2	2	2	1	1	2	2	2	2	1	2	2
		13.4696	13.5254	13.5785	13.5393	13.5147	13.513	13.4867	13.6214	13.5525	13.5952	13.2526	13.3211	13.3095	13.2049	13.2369	13.4109	13.2151	13.0429	13.2064	13.226	CDC27	CDC27	CDC27_HUMAN	P30260	P30260	Cell division cycle protein 27 homolog	NA	NA	NA	NA	18	18	18	18	18	18	18	18	17	18	17	16	16	17	18	18	16	17
		17.9645	18.0374	17.7058	17.8247	17.8167	17.7863	17.8936	17.8264	17.9028	17.9498	17.8012	17.7305	17.7644	17.7785	17.756	17.8019	17.6691	17.7657	17.7681	17.8255	CDC37	CDC37	CDC37_HUMAN	Q16543	Q16543	Hsp90 co-chaperone Cdc37	SASP	NA	altered	NA	36	35	34	34	33	34	34	36	35	35	35	34	34	35	35	35	35	34
		18.5197	18.4686	18.425	18.5042	18.5084	18.4568	18.5801	18.3447	18.3633	18.6088	18.3057	18.7193	18.5302	18.4359	18.3142	18.3944	18.3977	18.4895	18.348	18.4279	CDC42.1	CDC42	CDC42_HUMAN	P60953	P60953	Cell division control protein 42 homolog	SASP	NA	down	NA	13	13	13	13	13	13	13	13	13	13	13	13	13	12	12	12	11	12
		15.8815	16.0636	15.7651	15.802	16.2576	15.9014	16.026	15.5602	15.6671	16.3494	16.5619	16.8485	16.6488	16.0236	16.1379	16.7682	16.6183	16.715	16.2728	16.3347	CDC42	CDC42;RAC1;RAC2;RAC3;RHOG;RHOJ;RHOQ	CDC42_HUMAN;RAC1_HUMAN;RAC2_HUMAN;RAC3_HUMAN;RHOG_HUMAN;RHOJ_HUMAN;RHOQ_HUMAN	P15153;P17081;P60763;P60953;P63000;P84095;Q9H4E5	P60953;P63000;P15153;P60763;P84095;Q9H4E5;P17081	Ras-related C3 botulinum toxin substrate 2	SASP	NA	altered;down	NA	1	1	1	1	1	1	1	1	1	1	1	1	1	1	1	1	1	1
		15.5187	15.4594	15.4418	15.4555	15.5344	15.6408	15.5803	15.5285	15.5953	15.5318	15.3896	15.3656	15.414	15.423	15.375	15.4576	15.3681	15.4627	15.4432	15.5393	CDC5L	CDC5L	CDC5L_HUMAN	Q99459	Q99459	Cell division cycle 5-like protein	SASP	NA	up	NA	41	41	41	40	43	46	43	41	45	46	41	36	43	40	36	43	39	38
		13.7817	13.8849	13.8378	13.9518	13.8325	13.9339	13.9187	13.8866	13.869	14.0201	13.8106	13.6923	13.6877	13.6957	13.5849	13.845	13.5258	13.6014	13.5566	13.7517	CDC73	CDC73	CDC73_HUMAN	Q6P1J9	Q6P1J9	Parafibromin	NA	NA	NA	NA	24	23	25	23	23	22	24	22	25	24	21	21	20	21	21	22	19	20
		11.4723	9.48584	11.3812	11.2532	11.3632	11.2265	11.3055	11.3429	11.3006	11.5496	11.2288	11.7902	11.6569	11.4814	11.8484	11.5371	12.1568	11.7353	11.9147	11.5769	CDCA5	CDCA5	CDCA5_HUMAN	Q96FF9	Q96FF9	Sororin	NA	NA	NA	NA	2	0	2	2	2	2	2	2	1	2	1	1	2	1	1	2	1	1
		13.7129	14.3482	14.2859	14.2261	14.214	14.0937	14.043	14.1608	13.9925	14.2164	13.3645	13.3021	13.3684	13.4255	13.4257	13.6693	13.131	13.0046	13.0162	13.3656	CDCP1	CDCP1	CDCP1_HUMAN	Q9H5V8	Q9H5V8	CUB domain-containing protein 1	NA	NA	NA	NA	6	6	7	6	6	6	6	7	7	7	6	5	5	5	3	6	5	6
		14.8168	15.1407	15.2549	15.1547	15.3344	15.2629	15.0274	15.2946	15.487	15.5891	15.5601	15.8725	15.614	15.755	15.6235	15.5729	15.7192	15.8239	15.752	15.7093	CDIPT	CDIPT	CDIPT_HUMAN	O14735	O14735	CDP-diacylglycerol--inositol 3-phosphatidyltransferase	NA	NA	NA	NA	11	11	12	12	11	12	12	13	13	13	12	12	13	12	12	12	12	11
		14.8278	14.7548	14.5692	14.4894	14.3969	14.1894	14.4629	14.1721	14.1433	14.3399	13.6143	13.5396	13.4799	13.8284	13.7852	14.0816	14.5519	14.2581	14.3412	14.3322	CDK1.1	CDK1	CDK1_HUMAN	P06493	P06493	Cyclin-dependent kinase 1	SASP	NA	up	NA	14	13	10	12	12	12	13	13	10	12	7	7	8	7	8	11	8	12
		13.2185	14.0745	14.1325	14.4662	13.7598	13.7598	13.6147	14.0192	13.826	13.6088	12.7982	12.5715	12.9271	12.9326	12.6413	13.4121	13.2594	13.3264	12.716	13.1514	CDK1.2	CDK1;CDK2	CDK1_HUMAN;CDK2_HUMAN	P06493;P24941	P06493;P24941;Q00526	Cyclin-dependent kinase 1	SASP	NA	up	NA	1	1	1	1	1	1	1	1	1	1	1	1	1	1	1	1	1	1
		12.1671	12.0828	12.0111	11.8871	11.9811	12.0657	12.0799	12.0922	12.1652	12.1736	12.235	12.2936	12.1794	12.0968	12.2245	12.0881	12.0835	12.0963	12.1101	12.1776	CDK12.1	CDK12	CDK12_HUMAN	Q9NYV4	Q9NYV4	Cyclin-dependent kinase 12	NA	NA	NA	NA	19	21	17	18	19	20	19	17	19	16	19	17	17	19	17	18	17	17
		12.6608	12.7419	12.5397	12.8272	12.424	12.6097	12.8297	12.593	12.4505	12.7456	12.4768	12.0347	12.7874	12.7783	12.3611	12.5981	12.4239	12.8312	12.5135	12.8866	CDK12	CDK12;CDK13	CDK12_HUMAN;CDK13_HUMAN	Q14004;Q9NYV4	Q9NYV4;Q14004	Cyclin-dependent kinase 13	NA	NA	NA	NA	3	4	2	3	3	3	1	4	3	3	3	1	2	3	3	3	3	2
		17.0909	17.3874	17.4568	17.5912	17.366	17.3075	17.1455	17.3988	17.2796	17.3541	16.8685	17.1839	17.157	16.9253	16.9898	17.2527	16.9836	16.8141	17.103	17.212	CDK1	CDK1;CDK12;CDK13;CDK14;CDK16;CDK17;CDK2;CDK4;CDK5;CDK6;CDK9	CDK12_HUMAN;CDK13_HUMAN;CDK14_HUMAN;CDK16_HUMAN;CDK17_HUMAN;CDK1_HUMAN;CDK2_HUMAN;CDK4_HUMAN;CDK5_HUMAN;CDK6_HUMAN;CDK9_HUMAN	O94921;P06493;P11802;P24941;P50750;Q00534;Q00535;Q00536;Q00537;Q14004;Q9NYV4	Q9NYV4;Q14004;O94921;Q96Q40;Q00536;Q00537;Q07002;P06493;P24941;Q00526;P11802;Q00535;Q00534;P50750	Cyclin-dependent kinase 14	SASP	NA	up	NA	1	1	1	1	1	1	1	1	1	1	1	1	1	1	1	1	1	1
		12.9319	12.5907	12.763	12.5723	12.7743	12.9396	12.8399	12.8217	12.8567	12.9144	12.8688	12.7676	12.8378	12.7325	12.772	12.8735	12.7289	12.7853	12.8188	12.889	CDK13	CDK13	CDK13_HUMAN	Q14004	Q14004	Cyclin-dependent kinase 13	NA	NA	NA	NA	19	18	16	17	18	20	18	16	18	17	20	17	16	20	19	18	13	19
		12.5561	12.4846	12.5146	12.5161	12.4691	12.5445	12.548	12.6258	12.7365	12.621	12.4842	12.4469	12.6189	12.5129	12.5143	12.4622	12.6265	12.4417	12.4118	12.3682	CDK14	CDK14	CDK14_HUMAN	O94921	O94921	Cyclin-dependent kinase 14	NA	NA	NA	NA	10	9	9	10	10	9	10	8	9	9	9	9	11	10	8	10	10	11
		13.5317	13.4237	13.7322	12.1839	12.1394	11.9203	11.3571	11.8178	11.193	12.213	12.6642	13.5892	13.0422	13.013	13.3354	13.2156	13.8603	14.116	12.4759	13.0265	CDK14.1	CDK14;CDK16	CDK14_HUMAN;CDK16_HUMAN	O94921;Q00536	O94921;Q00536	Cyclin-dependent kinase 14	SASP	NA	up	NA	1	1	1	1	1	1	1	1	1	1	1	1	1	1	1	1	1	1
		13.119	12.9743	12.8751	12.7351	12.8246	12.9371	13.1044	12.8928	12.9634	12.9205	13.2707	13.1307	13.3226	13.289	13.3205	13.2404	13.3205	13.2476	13.2609	13.1298	CDK16	CDK16	CDK16_HUMAN	Q00536	Q00536	Cyclin-dependent kinase 16	SASP	NA	up	NA	9	10	10	10	11	11	9	9	11	11	10	9	13	11	11	12	11	11
		13.5059	13.1614	12.5051	12.8899	12.8657	13.0528	13.3049	12.4039	12.8423	13.0148	13.3224	13.0177	13.1152	13.291	12.9421	13.0311	12.7863	13.0374	12.7305	12.8863	CDK16.1	CDK16;CDK17	CDK16_HUMAN;CDK17_HUMAN	Q00536;Q00537	Q00536;Q00537	Cyclin-dependent kinase 16	SASP	NA	up	NA	3	3	3	3	3	3	3	3	3	3	3	3	3	3	3	3	3	3
		12.9841	12.9271	12.9852	12.8835	12.8237	12.9089	12.9988	13.0784	12.915	13.2834	13.0625	12.9403	13.0516	13.0278	12.9765	13.0842	12.9002	13.0524	13.1292	13.1842	CDK17	CDK17	CDK17_HUMAN	Q00537	Q00537	Cyclin-dependent kinase 17	NA	NA	NA	NA	12	13	11	13	10	12	14	13	12	12	14	11	12	12	12	13	12	14
		12.8081	12.7065	12.7653	12.4705	12.8297	12.8966	12.8004	12.8589	12.843	12.9203	12.6798	12.839	12.7422	12.6096	12.6679	12.8509	12.9248	12.7926	12.6848	12.9372	CDK19	CDK19	CDK19_HUMAN	Q9BWU1	Q9BWU1	Cyclin-dependent kinase 19	NA	NA	NA	NA	6	7	7	7	6	7	7	7	7	7	7	7	7	5	6	7	7	7
		13.5368	13.5238	13.3943	13.508	13.6262	13.5024	13.5197	13.4702	13.5394	13.6376	13.0167	13.3407	13.0463	13.1244	13.1962	13.3841	13.3661	13.2788	13.4762	13.4965	CDK2	CDK2	CDK2_HUMAN	P24941	P24941	Cyclin-dependent kinase 2	NA	NA	NA	NA	8	8	9	7	7	7	8	8	7	9	6	6	8	9	8	9	7	9
		11.5557	10.8883	11.6555	11.2005	11.1732	11.3795	11.1063	11.3097	11.0334	11.1257	11.2967	11.5256	10.9731	11.1973	11.4873	11.102	11.5184	10.8475	11.0437	11.2628	CDK20	CDK20	CDK20_HUMAN	Q8IZL9	Q8IZL9	Cyclin-dependent kinase 20	SASP	NA	up	NA	1	3	3	3	3	2	3	3	2	2	3	2	3	2	2	3	3	3
		14.2543	14.2776	14.0932	14.1788	14.2343	14.2167	14.3395	14.3676	14.2353	14.4014	14.4117	14.3795	14.3457	14.3903	14.3928	14.4397	14.3387	14.3291	14.4311	14.4036	CDK4	CDK4	CDK4_HUMAN	P11802	P11802	Cyclin-dependent kinase 4	NA	NA	NA	NA	21	20	20	21	21	19	21	19	20	20	20	21	21	20	21	20	21	20
		15.2471	15.2652	15.2429	15.23	15.315	15.2885	15.3805	15.3973	15.4396	15.3917	15.4699	15.5442	15.5506	15.551	15.5427	15.5282	15.658	15.5566	15.4116	15.4255	CDK5	CDK5	CDK5_HUMAN	Q00535	Q00535	Cyclin-dependent-like kinase 5	NA	NA	NA	NA	17	19	20	18	20	19	18	19	20	20	19	20	20	18	19	17	18	18
		14.6598	14.5019	14.5375	14.5344	14.6637	14.7037	14.7622	14.6993	14.6656	14.7394	14.4418	14.4431	14.5593	14.4709	14.242	14.5364	14.5258	14.5204	14.4162	14.5273	CDK6	CDK6	CDK6_HUMAN	Q00534	Q00534	Cyclin-dependent kinase 6	NA	NA	NA	NA	15	16	16	16	16	17	16	16	18	17	17	16	16	16	15	15	16	16
		13.497	13.2774	13.2506	13.2831	13.2982	13.5237	13.5089	13.4682	13.3502	13.3713	13.507	13.6328	13.4043	13.5795	13.3933	13.6028	13.5301	13.4903	13.5001	13.4011	CDK7	CDK7	CDK7_HUMAN	P50613	P50613	Cyclin-dependent kinase 7	NA	NA	NA	NA	10	13	12	12	11	14	15	14	12	14	13	12	14	13	12	14	13	13
		14.1031	13.9348	13.8244	13.9674	13.9897	13.9277	13.8632	13.9511	14.0829	14.0709	14.1267	14.086	14.1391	14.0767	14.1174	14.0795	14.1116	14.1751	14.1348	14.144	CDK9	CDK9	CDK9_HUMAN	P50750	P50750	Cyclin-dependent kinase 9	NA	NA	NA	NA	9	10	10	10	11	11	11	9	11	11	9	8	11	10	10	10	8	10
		12.5089	12.227	11.9475	12.1154	12.1056	12.2838	12.3463	12.2814	12.0404	12.3377	12.2439	12.1919	11.7932	12.2088	11.8528	12.2676	12.0261	12.3163	12.1588	12.2345	CDK2AP1	CDK2AP1	CDKA1_HUMAN	O14519	O14519	Cyclin-dependent kinase 2-associated protein 1	NA	NA	NA	NA	2	3	1	3	3	3	3	2	1	1	2	1	1	2	1	2	2	2
		11.701	11.8752	12.0981	11.9028	11.9213	11.7026	11.5113	11.5892	11.6126	11.7596	11.5726	11.5194	11.4135	11.4021	11.5972	11.41	11.521	11.3051	11.21	11.3854	CDKAL1	CDKAL1	CDKAL_HUMAN	Q5VV42	Q5VV42	Threonylcarbamoyladenosine tRNA methylthiotransferase	NA	NA	NA	NA	9	11	12	11	11	11	11	10	9	10	7	8	7	5	7	8	7	6
		12.2989	11.9431	11.413	11.6085	12.1922	11.8607	11.8443	11.1432	11.5884	11.5067	11.9118	12.2984	12.0565	11.9684	12.2291	12.3295	12.079	12.3436	12.1565	12.1388	CDKL1	CDKL1;CDKL3;CDKL5;PRKD1;PRKD2;PRKD3	CDKL1_HUMAN;CDKL3_HUMAN;CDKL5_HUMAN;KPCD1_HUMAN;KPCD2_HUMAN;KPCD3_HUMAN	O76039;O94806;Q00532;Q15139;Q8IVW4;Q9BZL6	Q00532;Q92772;Q8IVW4;O76039;Q15139;Q9BZL6;O94806;Q9NRP7	Cyclin-dependent kinase-like 5	NA	NA	NA	NA	1	1	1	1	1	1	1	1	1	1	1	1	1	1	1	1	1	1
		10.0264	9.76672	9.49309	11.1081	11.6956	10.5341	11.4481	12.0714	10.3457	10.2681	11.8503	11.5786	10.3145	11.572	9.35202	10.2362	9.92838	9.6316	10.7641	11.3021	CDKL5	CDKL5	CDKL5_HUMAN	O76039	O76039	Cyclin-dependent kinase-like 5	NA	NA	NA	NA	0	0	0	0	1	0	1	1	0	0	1	1	0	1	0	0	0	0
		13.0378	13.3544	13.1087	12.9795	12.9551	13.1622	13.2822	13.2377	13.0651	13.1027	14.4043	14.4505	14.5153	14.2921	14.33	14.2746	14.0032	14.0718	14.0838	14.1333	CDKN1A	CDKN1A	CDN1A_HUMAN	P38936	P38936	Cyclin-dependent kinase inhibitor 1	NA	NA	NA	NA	5	5	5	4	5	5	5	5	5	5	5	5	5	5	5	5	5	5
[truncated: 8,322 more rows]
[truncated: 55 more columns]

## Sheet: Legend
Project	ThGA
Exp Name	ThGA_PC12_CL
Link	2022-04-19
