# Supplementary material for: Promitotic Action of Oenothera biennis on Senescent Human Dermal Fibroblasts
Source: Int J Mol Sci. 2022 Dec 2;23(23):15153. doi: 10.3390/ijms232315153 (PMC9735661; doi:10.3390/ijms232315153)
Supplement: Supplementary file 1 [file ijms-23-15153-s001.zip › Table S2. Reactome enrichment analysis of upregulated proteins in H2O2 treated NHDF cells.csv]

Pathway identifier	Pathway name	#Entities found	#Entities total	Entities ratio	Entities pValue	Entities FDR	#Reactions found	#Reactions total	Reactions ratio	Species identifier	Species name	Submitted entities found	Mapped entities	Found reaction identifiers
R-HSA-69560	Transcriptional activation of p53 responsive genes	3	6	3.9724576271186443E-4	2.794376978698665E-7	3.0458709067815448E-5	4	5	3.6247643903146296E-4	9606	Homo sapiens	CDKN1A		R-HSA-6803411;R-HSA-6803388;R-HSA-6803403;R-HSA-6803801
R-HSA-69895	Transcriptional activation of cell cycle inhibitor p21	3	6	3.9724576271186443E-4	2.794376978698665E-7	3.0458709067815448E-5	4	5	3.6247643903146296E-4	9606	Homo sapiens	CDKN1A		R-HSA-6803411;R-HSA-6803388;R-HSA-6803403;R-HSA-6803801
R-HSA-6804116	TP53 Regulates Transcription of Genes Involved in G1 Cell Cycle Arrest	3	20	0.0013241525423728813	1.0150140941078689E-5	7.409602886987443E-4	6	17	0.001232419892706974	9606	Homo sapiens	CDKN1A		R-HSA-6803411;R-HSA-69562;R-HSA-6803388;R-HSA-187934;R-HSA-6803403;R-HSA-6803801
R-HSA-69620	Cell Cycle Checkpoints	6	279	0.018471927966101694	1.9658698052427148E-5	0.001061569694831066	10	56	0.0040597361171523854	9606	Homo sapiens	DYNC1LI1;CDKN1A;MAPRE1		R-HSA-141409;R-HSA-6803411;R-HSA-141431;R-HSA-69562;R-HSA-6803388;R-HSA-141422;R-HSA-187934;R-HSA-6803403;R-HSA-141439;R-HSA-6803801
R-HSA-9617828	FOXO-mediated transcription of cell cycle genes	3	27	0.0017876059322033898	2.473150808113278E-5	0.0010634548474887096	5	22	0.001594896331738437	9606	Homo sapiens	CDKN1A		R-HSA-9617840;R-HSA-6803411;R-HSA-9618004;R-HSA-6803403;R-HSA-9617838
R-HSA-8866911	TFAP2 (AP-2) family regulates transcription of cell cycle factors	2	6	3.9724576271186443E-4	7.281773850420503E-5	0.002621438586151381	3	4	2.899811512251704E-4	9606	Homo sapiens	CDKN1A		R-HSA-8865280;R-HSA-8865244;R-HSA-8865256
R-HSA-8941855	RUNX3 regulates CDKN1A transcription	2	8	5.296610169491525E-4	1.2912303183953977E-4	0.004002813987025733	3	6	4.3497172683775554E-4	9606	Homo sapiens	CDKN1A		R-HSA-8878130;R-HSA-8878178;R-HSA-8878186
R-HSA-6791312	TP53 Regulates Transcription of Cell Cycle Genes	3	65	0.004303495762711864	3.273385468541834E-4	0.008098272758171543	6	42	0.003044802087864289	9606	Homo sapiens	CDKN1A		R-HSA-6803411;R-HSA-69562;R-HSA-6803388;R-HSA-187934;R-HSA-6803403;R-HSA-6803801
R-HSA-69580	p53-Dependent G1/S DNA damage checkpoint	3	70	0.0046345338983050845	4.060135200926185E-4	0.008098272758171543	6	22	0.001594896331738437	9606	Homo sapiens	CDKN1A		R-HSA-6803411;R-HSA-69562;R-HSA-6803388;R-HSA-187934;R-HSA-6803403;R-HSA-6803801
R-HSA-69563	p53-Dependent G1 DNA Damage Response	3	70	0.0046345338983050845	4.060135200926185E-4	0.008098272758171543	6	22	0.001594896331738437	9606	Homo sapiens	CDKN1A		R-HSA-6803411;R-HSA-69562;R-HSA-6803388;R-HSA-187934;R-HSA-6803403;R-HSA-6803801
R-HSA-69615	G1/S DNA Damage Checkpoints	3	72	0.004766949152542373	4.4059520353956216E-4	0.008098272758171543	6	26	0.0018848774829636073	9606	Homo sapiens	CDKN1A		R-HSA-6803411;R-HSA-69562;R-HSA-6803388;R-HSA-187934;R-HSA-6803403;R-HSA-6803801
R-HSA-428540	Activation of RAC1	2	15	9.93114406779661E-4	4.499040421206413E-4	0.008098272758171543	4	4	2.899811512251704E-4	9606	Homo sapiens	NCK1		R-HSA-428535;R-HSA-428515;R-HSA-428531;R-HSA-428511
R-HSA-6803211	TP53 Regulates Transcription of Death Receptors and Ligands	2	18	0.0011917372881355933	6.453833115916963E-4	0.01032613298546714	2	7	5.074670146440482E-4	9606	Homo sapiens	TNFRSF10C		R-HSA-5633414;R-HSA-5633441
R-HSA-9702518	STAT5 activation downstream of FLT3 ITD mutants	2	21	0.0013903601694915254	8.750789019266181E-4	0.012363203698911196	2	14	0.0010149340292880964	9606	Homo sapiens	CDKN1A		R-HSA-9698043;R-HSA-9698041
R-HSA-141444	Amplification of signal from unattached kinetochores via a MAD2 inhibitory signal	3	94	0.006223516949152542	9.510156691470151E-4	0.012363203698911196	4	4	2.899811512251704E-4	9606	Homo sapiens	DYNC1LI1;MAPRE1		R-HSA-141409;R-HSA-141431;R-HSA-141422;R-HSA-141439
R-HSA-141424	Amplification of signal from the kinetochores	3	94	0.006223516949152542	9.510156691470151E-4	0.012363203698911196	4	4	2.899811512251704E-4	9606	Homo sapiens	DYNC1LI1;MAPRE1		R-HSA-141409;R-HSA-141431;R-HSA-141422;R-HSA-141439
R-HSA-373753	Nephrin family interactions	2	25	0.0016551906779661016	0.0012338737238402064	0.014806484686082477	2	13	9.424387414818037E-4	9606	Homo sapiens	NCK1		R-HSA-532603;R-HSA-373724
R-HSA-9614085	FOXO-mediated transcription	3	110	0.007282838983050847	0.0014906048072366174	0.016824613077617734	5	85	0.00616209946353487	9606	Homo sapiens	CDKN1A		R-HSA-9617840;R-HSA-6803411;R-HSA-9618004;R-HSA-6803403;R-HSA-9617838
R-HSA-69618	Mitotic Spindle Checkpoint	3	111	0.007349046610169492	0.0015295102797834303	0.016824613077617734	4	7	5.074670146440482E-4	9606	Homo sapiens	DYNC1LI1;MAPRE1		R-HSA-141409;R-HSA-141431;R-HSA-141422;R-HSA-141439
R-HSA-9703648	Signaling by FLT3 ITD and TKD mutants	2	30	0.001986228813559322	0.0017654775719185833	0.017654775719185833	2	24	0.0017398869073510222	9606	Homo sapiens	CDKN1A		R-HSA-9698043;R-HSA-9698041
R-HSA-9648025	EML4 and NUDC in mitotic spindle formation	3	121	0.008011122881355932	0.0019540294075587328	0.018032427631649917	1	5	3.6247643903146296E-4	9606	Homo sapiens	DYNC1LI1;MAPRE1		R-HSA-9648114
R-HSA-9703465	Signaling by FLT3 fusion proteins	2	32	0.00211864406779661	0.002003603070183324	0.018032427631649917	2	18	0.0013049151805132667	9606	Homo sapiens	CDKN1A		R-HSA-9698043;R-HSA-9698041
R-HSA-2500257	Resolution of Sister Chromatid Cohesion	3	134	0.008871822033898306	0.0026066485274136575	0.023459836746722917	4	8	5.799623024503408E-4	9606	Homo sapiens	DYNC1LI1;MAPRE1		R-HSA-2484822;R-HSA-1638803;R-HSA-2468287;R-HSA-1638821
R-HSA-186763	Downstream signal transduction	2	37	0.0024496822033898305	0.0026616219439922206	0.023504955242752423	1	16	0.0011599246049006815	9606	Homo sapiens	NCK1		R-HSA-382058
R-HSA-3700989	Transcriptional Regulation by TP53	5	487	0.03224311440677966	0.002938119405344053	0.023504955242752423	8	259	0.018776279541829782	9606	Homo sapiens	CDKN1A;TNFRSF10C		R-HSA-5633414;R-HSA-5633441;R-HSA-6803411;R-HSA-69562;R-HSA-6803388;R-HSA-187934;R-HSA-6803403;R-HSA-6803801
R-HSA-9013424	RHOV GTPase cycle	2	39	0.0025820974576271187	0.0029496130733878134	0.023596904587102507	1	2	1.449905756125852E-4	9606	Homo sapiens	NCK1		R-HSA-9018794
R-HSA-1640170	Cell Cycle	6	734	0.04859639830508475	0.0033898330537978083	0.024112881451952783	50	451	0.03269537480063796	9606	Homo sapiens	DYNC1LI1;CDKN1A;MAPRE1		R-HSA-187520;R-HSA-375302;R-HSA-380294;R-HSA-8942607;R-HSA-1638803;R-HSA-380303;R-HSA-8852362;R-HSA-187916;R-HSA-380311;R-HSA-380316;R-HSA-2468287;R-HSA-8853405;R-HSA-187934;R-HSA-187552;R-HSA-380455;R-HSA-9018017;R-HSA-8853419;R-HSA-6803403;R-HSA-6803411;R-HSA-187574;R-HSA-187575;R-HSA-187828;R-HSA-69562;R-HSA-1638821;R-HSA-6803801;R-HSA-2467809;R-HSA-2467811;R-HSA-8852298;R-HSA-3000319;R-HSA-89…
R-HSA-1474228	Degradation of the extracellular matrix	3	148	0.009798728813559322	0.003444697350278969	0.024112881451952783	8	105	0.007612005219660722	9606	Homo sapiens	MMP11;PZP;COL10A1		R-HSA-1592297;R-HSA-1454757;R-HSA-1564112;R-HSA-2484882;R-HSA-1564143;R-HSA-1454781;R-HSA-1602484;R-HSA-2537499
R-HSA-5663220	RHO GTPases Activate Formins	3	149	0.009864936440677966	0.003510142822087947	0.02457099975461563	3	27	0.0019573727707699	9606	Homo sapiens	DYNC1LI1;MAPRE1		R-HSA-5666160;R-HSA-5666129;R-HSA-5666169
R-HSA-9682385	FLT3 signaling in disease	2	43	0.0028469279661016947	0.003567461808713368	0.024972232660993576	2	52	0.0037697549659272147	9606	Homo sapiens	CDKN1A		R-HSA-9698043;R-HSA-9698041
R-HSA-9013420	RHOU GTPase cycle	2	44	0.002913135593220339	0.0037305647170821077	0.02544233596676948	1	4	2.899811512251704E-4	9606	Homo sapiens	NCK1		R-HSA-9018766
R-HSA-9646399	Aggrephagy	2	47	0.003111758474576271	0.004240389327794913	0.02544233596676948	5	15	0.001087429317094389	9606	Homo sapiens	DYNC1LI1		R-HSA-9646679;R-HSA-9646390;R-HSA-9646383;R-HSA-9646685;R-HSA-9646348
R-HSA-195258	RHO GTPase Effectors	4	326	0.021583686440677968	0.004286599421425397	0.02571959652855238	8	113	0.008191967522111062	9606	Homo sapiens	DYNC1LI1;MAPRE1;NCK1		R-HSA-2197698;R-HSA-2029466;R-HSA-442592;R-HSA-5666160;R-HSA-5666129;R-HSA-2197691;R-HSA-2197690;R-HSA-5666169
R-HSA-8864260	Transcriptional regulation by the AP-2 (TFAP2) family of transcription factors	2	52	0.0034427966101694915	0.005157658968705459	0.03094595381223275	3	44	0.003189792663476874	9606	Homo sapiens	CDKN1A		R-HSA-8865280;R-HSA-8865244;R-HSA-8865256
R-HSA-2467813	Separation of Sister Chromatids	3	195	0.012910487288135594	0.007384202899290426	0.04088608115424053	2	8	5.799623024503408E-4	9606	Homo sapiens	DYNC1LI1;MAPRE1		R-HSA-2467809;R-HSA-2467811
R-HSA-6811436	COPI-independent Golgi-to-ER retrograde traffic	2	63	0.004171080508474576	0.007465375341840108	0.04088608115424053	2	7	5.074670146440482E-4	9606	Homo sapiens	DYNC1LI1		R-HSA-8849350;R-HSA-8849353
R-HSA-8985801	Regulation of cortical dendrite branching	1	4	2.6483050847457627E-4	0.008177216230848106	0.04088608115424053	1	2	1.449905756125852E-4	9606	Homo sapiens	NCK1		R-HSA-8985812
R-HSA-1442490	Collagen degradation	2	69	0.004568326271186441	0.008887060572766337	0.04443530286383168	5	34	0.002464839785413948	9606	Homo sapiens	MMP11;COL10A1		R-HSA-1454757;R-HSA-1564112;R-HSA-2484882;R-HSA-1564143;R-HSA-2537499
R-HSA-186797	Signaling by PDGF	2	70	0.0046345338983050845	0.009134914737668254	0.04567457368834127	1	31	0.0022473539219950702	9606	Homo sapiens	NCK1		R-HSA-382058
R-HSA-68877	Mitotic Prometaphase	3	211	0.013969809322033898	0.009151104729502424	0.04575552364751212	8	20	0.0014499057561258518	9606	Homo sapiens	DYNC1LI1;MAPRE1		R-HSA-9648114;R-HSA-2484822;R-HSA-375302;R-HSA-380316;R-HSA-380508;R-HSA-1638803;R-HSA-2468287;R-HSA-1638821
R-HSA-2559586	DNA Damage/Telomere Stress Induced Senescence	2	71	0.004700741525423728	0.009385850645025395	0.04692925322512698	6	18	0.0013049151805132667	9606	Homo sapiens	CDKN1A		R-HSA-4647613;R-HSA-69562;R-HSA-3786258;R-HSA-187934;R-HSA-4647594;R-HSA-4647593
R-HSA-3371497	HSP90 chaperone cycle for steroid hormone receptors (SHR) in the presence of ligand	2	72	0.004766949152542373	0.009639855464120273	0.048199277320601364	1	16	0.0011599246049006815	9606	Homo sapiens	DYNC1LI1		R-HSA-5618080
R-HSA-9749641	Aspirin ADME	2	80	0.005296610169491525	0.011780847223837543	0.05053129449730154	2	26	0.0018848774829636073	9606	Homo sapiens	CES2		R-HSA-9749792;R-HSA-9749647
R-HSA-8852276	The role of GTSE1 in G2/M progression after G2 checkpoint	2	83	0.005495233050847458	0.012632823624325384	0.05053129449730154	3	10	7.249528780629259E-4	9606	Homo sapiens	CDKN1A;MAPRE1		R-HSA-8852306;R-HSA-8852362;R-HSA-8852298
R-HSA-5633008	TP53 Regulates Transcription of Cell Death Genes	2	83	0.005495233050847458	0.012632823624325384	0.05053129449730154	2	68	0.004929679570827896	9606	Homo sapiens	TNFRSF10C		R-HSA-5633414;R-HSA-5633441
R-HSA-194315	Signaling by Rho GTPases	5	709	0.04694120762711865	0.013949053407025458	0.05579621362810183	10	203	0.014716543424677396	9606	Homo sapiens	DYNC1LI1;MAPRE1;NCK1		R-HSA-9018794;R-HSA-2197698;R-HSA-2029466;R-HSA-442592;R-HSA-5666160;R-HSA-9018766;R-HSA-5666129;R-HSA-2197691;R-HSA-2197690;R-HSA-5666169
R-HSA-68882	Mitotic Anaphase	3	249	0.016485699152542374	0.014273093692580563	0.05709237477032225	2	32	0.002319849209801363	9606	Homo sapiens	DYNC1LI1;MAPRE1		R-HSA-2467809;R-HSA-2467811
R-HSA-9663891	Selective autophagy	2	89	0.005892478813559322	0.014415224366291945	0.05766089746516778	5	48	0.0034797738147020443	9606	Homo sapiens	DYNC1LI1		R-HSA-9646679;R-HSA-9646390;R-HSA-9646383;R-HSA-9646685;R-HSA-9646348
R-HSA-2555396	Mitotic Metaphase and Anaphase	3	250	0.016551906779661018	0.014425908672475618	0.05770363468990247	2	33	0.0023923444976076554	9606	Homo sapiens	DYNC1LI1;MAPRE1		R-HSA-2467809;R-HSA-2467811
R-HSA-9716542	Signaling by Rho GTPases, Miro GTPases and RHOBTB3	5	725	0.04800052966101695	0.015239655672863006	0.060958622691452025	10	212	0.01536900101493403	9606	Homo sapiens	DYNC1LI1;MAPRE1;NCK1		R-HSA-9018794;R-HSA-2197698;R-HSA-2029466;R-HSA-442592;R-HSA-5666160;R-HSA-9018766;R-HSA-5666129;R-HSA-2197691;R-HSA-2197690;R-HSA-5666169
R-HSA-983695	Antigen activates B Cell Receptor (BCR) leading to generation of second messengers	2	103	0.006819385593220339	0.018967858262423754	0.07587143304969501	10	25	0.0018123821951573148	9606	Homo sapiens	IGLV3-21;NCK1		R-HSA-9606162;R-HSA-9606163;R-HSA-983709;R-HSA-983707;R-HSA-9606151;R-HSA-983703;R-HSA-1112666;R-HSA-983700;R-HSA-9606159;R-HSA-983696
R-HSA-6807878	COPI-mediated anterograde transport	2	107	0.0070842161016949155	0.020366408863219165	0.08146563545287666	2	12	8.699434536755111E-4	9606	Homo sapiens	DYNC1LI1		R-HSA-6809006;R-HSA-6809003
R-HSA-8878159	Transcriptional regulation by RUNX3	2	118	0.0078125	0.02442725991537764	0.08328621609834208	3	47	0.003407278526895752	9606	Homo sapiens	CDKN1A		R-HSA-8878130;R-HSA-8878178;R-HSA-8878186
R-HSA-4420097	VEGFA-VEGFR2 Pathway	2	129	0.008540783898305085	0.028791348322005805	0.08328621609834208	9	79	0.005727127736697115	9606	Homo sapiens	NCK1		R-HSA-5218815;R-HSA-5218847;R-HSA-5218814;R-HSA-5218812;R-HSA-5218824;R-HSA-5218806;R-HSA-5218854;R-HSA-5218804;R-HSA-5218832
R-HSA-1474244	Extracellular matrix organization	3	329	0.0217823093220339	0.029502306254776456	0.08328621609834208	31	319	0.023125996810207338	9606	Homo sapiens	MMP11;PZP;COL10A1		R-HSA-8948232;R-HSA-2002460;R-HSA-8948234;R-HSA-1564112;R-HSA-2465890;R-HSA-8948224;R-HSA-8948226;R-HSA-8948228;R-HSA-8944262;R-HSA-8948230;R-HSA-8948231;R-HSA-1981128;R-HSA-1980233;R-HSA-1981120;R-HSA-1650808;R-HSA-2022073;R-HSA-1454781;R-HSA-1602484;R-HSA-2089971;R-HSA-1981104;R-HSA-1592297;R-HSA-8948219;R-HSA-1454757;R-HSA-2213207;R-HSA-8948222;R-HSA-2484882;R-HSA-1564143;R-HSA-2213208;R-HSA-1…
R-HSA-1500931	Cell-Cell communication	2	134	0.008871822033898306	0.03087128954714613	0.08328621609834208	2	60	0.004349717268377556	9606	Homo sapiens	NCK1		R-HSA-532603;R-HSA-373724
R-HSA-198323	AKT phosphorylates targets in the cytosol	1	16	0.001059322033898305	0.03232248113052849	0.08328621609834208	1	9	6.524575902566333E-4	9606	Homo sapiens	CDKN1A		R-HSA-198613
R-HSA-69278	Cell Cycle, Mitotic	4	596	0.03945974576271186	0.03261790876713455	0.08328621609834208	42	352	0.025518341307814992	9606	Homo sapiens	DYNC1LI1;CDKN1A;MAPRE1		R-HSA-187520;R-HSA-375302;R-HSA-380294;R-HSA-2467809;R-HSA-2467811;R-HSA-8942607;R-HSA-1638803;R-HSA-380303;R-HSA-8852362;R-HSA-8852298;R-HSA-187916;R-HSA-380311;R-HSA-3000319;R-HSA-8941915;R-HSA-8852306;R-HSA-198613;R-HSA-380316;R-HSA-380508;R-HSA-2468287;R-HSA-8853405;R-HSA-2574845;R-HSA-8942803;R-HSA-3000310;R-HSA-187934;R-HSA-2574840;R-HSA-9648114;R-HSA-187552;R-HSA-380455;R-HSA-9018017;R-HSA…
R-HSA-194138	Signaling by VEGF	2	140	0.009269067796610169	0.03344402668643309	0.08328621609834208	9	86	0.0062345947513411624	9606	Homo sapiens	NCK1		R-HSA-5218815;R-HSA-5218847;R-HSA-5218814;R-HSA-5218812;R-HSA-5218824;R-HSA-5218806;R-HSA-5218854;R-HSA-5218804;R-HSA-5218832
R-HSA-9661069	Defective binding of RB1 mutants to E2F1,(E2F2, E2F3)	1	17	0.0011255296610169492	0.034308708539199984	0.08328621609834208	1	1	7.24952878062926E-5	9606	Homo sapiens	CDKN1A		R-HSA-9659782
R-HSA-2559584	Formation of Senescence-Associated Heterochromatin Foci (SAHF)	1	17	0.0011255296610169492	0.034308708539199984	0.08328621609834208	1	2	1.449905756125852E-4	9606	Homo sapiens	CDKN1A		R-HSA-4647594
R-HSA-9659787	Aberrant regulation of mitotic G1/S transition in cancer due to RB1 defects	1	17	0.0011255296610169492	0.034308708539199984	0.08328621609834208	1	2	1.449905756125852E-4	9606	Homo sapiens	CDKN1A		R-HSA-9659782
R-HSA-8963896	HDL assembly	1	18	0.0011917372881355933	0.03629099032464045	0.08328621609834208	1	9	6.524575902566333E-4	9606	Homo sapiens	PZP		R-HSA-264758
R-HSA-8878166	Transcriptional regulation by RUNX2	2	147	0.009732521186440678	0.03654857205603601	0.08328621609834208	2	84	0.006089604175728578	9606	Homo sapiens	CDKN1A		R-HSA-9008456;R-HSA-9008433
R-HSA-8856688	Golgi-to-ER retrograde transport	2	148	0.009798728813559322	0.037000940765817614	0.08328621609834208	2	18	0.0013049151805132667	9606	Homo sapiens	DYNC1LI1		R-HSA-8849350;R-HSA-8849353
R-HSA-2132295	MHC class II antigen presentation	2	149	0.009864936440677966	0.03745549414177274	0.08328621609834208	1	26	0.0018848774829636073	9606	Homo sapiens	DYNC1LI1		R-HSA-2213248
R-HSA-1632852	Macroautophagy	2	150	0.00993114406779661	0.037912221963142034	0.08328621609834208	5	87	0.006307090039147456	9606	Homo sapiens	DYNC1LI1		R-HSA-9646679;R-HSA-9646390;R-HSA-9646383;R-HSA-9646685;R-HSA-9646348
R-HSA-418885	DCC mediated attractive signaling	1	19	0.0012579449152542372	0.038269334064032545	0.08328621609834208	6	12	8.699434536755111E-4	9606	Homo sapiens	NCK1		R-HSA-373716;R-HSA-418850;R-HSA-418865;R-HSA-418874;R-HSA-418858;R-HSA-418856
R-HSA-3270619	IRF3-mediated induction of type I IFN	1	19	0.0012579449152542372	0.038269334064032545	0.08328621609834208	1	5	3.6247643903146296E-4	9606	Homo sapiens	NLRC3		R-HSA-1834939
R-HSA-9664422	FCGR3A-mediated phagocytosis	2	157	0.010394597457627119	0.04116934898903013	0.08328621609834208	17	27	0.0019573727707699	9606	Homo sapiens	IGLV3-21;NCK1		R-HSA-9664275;R-HSA-9664273;R-HSA-2197698;R-HSA-2029466;R-HSA-9664406;R-HSA-442592;R-HSA-9666426;R-HSA-9666458;R-HSA-9666425;R-HSA-9666430;R-HSA-9666428;R-HSA-9666435;R-HSA-9666433;R-HSA-9664261;R-HSA-2197691;R-HSA-2197690;R-HSA-9664397
R-HSA-9664417	Leishmania phagocytosis	2	157	0.010394597457627119	0.04116934898903013	0.08328621609834208	17	27	0.0019573727707699	9606	Homo sapiens	IGLV3-21;NCK1		R-HSA-9664275;R-HSA-9664273;R-HSA-2197698;R-HSA-2029466;R-HSA-9664406;R-HSA-442592;R-HSA-9666426;R-HSA-9666458;R-HSA-9666425;R-HSA-9666430;R-HSA-9666428;R-HSA-9666435;R-HSA-9666433;R-HSA-9664261;R-HSA-2197691;R-HSA-2197690;R-HSA-9664397
R-HSA-9664407	Parasite infection	2	157	0.010394597457627119	0.04116934898903013	0.08328621609834208	17	27	0.0019573727707699	9606	Homo sapiens	IGLV3-21;NCK1		R-HSA-9664275;R-HSA-9664273;R-HSA-2197698;R-HSA-2029466;R-HSA-9664406;R-HSA-442592;R-HSA-9666426;R-HSA-9666458;R-HSA-9666425;R-HSA-9666430;R-HSA-9666428;R-HSA-9666435;R-HSA-9666433;R-HSA-9664261;R-HSA-2197691;R-HSA-2197690;R-HSA-9664397
R-HSA-2029482	Regulation of actin dynamics for phagocytic cup formation	2	158	0.010460805084745763	0.04164310804917104	0.08328621609834208	11	24	0.0017398869073510222	9606	Homo sapiens	IGLV3-21;NCK1		R-HSA-2197697;R-HSA-2029453;R-HSA-2197698;R-HSA-2029466;R-HSA-2029467;R-HSA-2029451;R-HSA-442592;R-HSA-2029476;R-HSA-2197691;R-HSA-2197690;R-HSA-2029458
R-HSA-199977	ER to Golgi Anterograde Transport	2	164	0.010858050847457628	0.04452907630744929	0.08905815261489858	2	39	0.002827316224445411	9606	Homo sapiens	DYNC1LI1		R-HSA-6809006;R-HSA-6809003
R-HSA-9612973	Autophagy	2	166	0.010990466101694915	0.04550736819846901	0.09101473639693802	5	108	0.0078294910830796	9606	Homo sapiens	DYNC1LI1		R-HSA-9646679;R-HSA-9646390;R-HSA-9646383;R-HSA-9646685;R-HSA-9646348
R-HSA-163210	Formation of ATP by chemiosmotic coupling	1	23	0.0015227754237288136	0.04614347961353826	0.09228695922707653	3	3	2.1748586341887777E-4	9606	Homo sapiens	MT-ATP8		R-HSA-164834;R-HSA-164832;R-HSA-164840
R-HSA-3928664	Ephrin signaling	1	23	0.0015227754237288136	0.04614347961353826	0.09228695922707653	7	11	7.974481658692185E-4	9606	Homo sapiens	NCK1		R-HSA-3928633;R-HSA-3928639;R-HSA-3928625;R-HSA-3928641;R-HSA-3928640;R-HSA-3928631;R-HSA-3928614
R-HSA-1834941	STING mediated induction of host immune responses	1	24	0.0015889830508474577	0.04810224628954385	0.0962044925790877	1	19	0.0013774104683195593	9606	Homo sapiens	NLRC3		R-HSA-1834939
R-HSA-140837	Intrinsic Pathway of Fibrin Clot Formation	1	26	0.0017213983050847457	0.052008108489516425	0.10139420804110255	1	24	0.0017398869073510222	9606	Homo sapiens	PZP		R-HSA-158340
R-HSA-68886	M Phase	3	416	0.02754237288135593	0.0529632064977168	0.10139420804110255	10	91	0.006597071190372626	9606	Homo sapiens	DYNC1LI1;MAPRE1		R-HSA-9648114;R-HSA-2484822;R-HSA-375302;R-HSA-2467809;R-HSA-2467811;R-HSA-380316;R-HSA-380508;R-HSA-1638803;R-HSA-2468287;R-HSA-1638821
R-HSA-2022377	Metabolism of Angiotensinogen to Angiotensins	1	27	0.0017876059322033898	0.053955218958316675	0.10139420804110255	1	20	0.0014499057561258518	9606	Homo sapiens	CES2		R-HSA-9619024
R-HSA-983705	Signaling by the B Cell Receptor (BCR)	2	189	0.012513241525423728	0.057315052074884076	0.10139420804110255	13	44	0.003189792663476874	9606	Homo sapiens	IGLV3-21;NCK1		R-HSA-9606162;R-HSA-9606163;R-HSA-5690740;R-HSA-1112666;R-HSA-983709;R-HSA-983707;R-HSA-9606151;R-HSA-983703;R-HSA-5690702;R-HSA-983700;R-HSA-5690701;R-HSA-9606159;R-HSA-983696
R-HSA-5674400	Constitutive Signaling by AKT1 E17K in Cancer	1	29	0.001920021186440678	0.05783783589172353	0.10139420804110255	1	18	0.0013049151805132667	9606	Homo sapiens	CDKN1A		R-HSA-2399969
R-HSA-2029480	Fcgamma receptor (FCGR) dependent phagocytosis	2	193	0.012778072033898306	0.059468357829348006	0.10139420804110255	22	42	0.003044802087864289	9606	Homo sapiens	IGLV3-21;NCK1		R-HSA-2197697;R-HSA-2197698;R-HSA-2029466;R-HSA-2029467;R-HSA-2029272;R-HSA-442592;R-HSA-2029273;R-HSA-2029270;R-HSA-2029271;R-HSA-1861621;R-HSA-2029268;R-HSA-2029458;R-HSA-2029459;R-HSA-2029457;R-HSA-2029455;R-HSA-2029452;R-HSA-2029453;R-HSA-2029451;R-HSA-2029449;R-HSA-2029476;R-HSA-2197691;R-HSA-2197690
R-HSA-8963898	Plasma lipoprotein assembly	1	30	0.001986228813559322	0.05977335721814048	0.10139420804110255	1	19	0.0013774104683195593	9606	Homo sapiens	PZP		R-HSA-264758
R-HSA-8949613	Cristae formation	1	31	0.0020524364406779663	0.061705030335922006	0.10139420804110255	1	2	1.449905756125852E-4	9606	Homo sapiens	MT-ATP8		R-HSA-8949580
R-HSA-9748784	Drug ADME	2	199	0.013175317796610169	0.06275075078662051	0.10139420804110255	2	78	0.005654632448890822	9606	Homo sapiens	CES2		R-HSA-9749792;R-HSA-9749647
R-HSA-2559583	Cellular Senescence	2	200	0.013241525423728813	0.06330381964579701	0.10139420804110255	8	90	0.006524575902566333	9606	Homo sapiens	CDKN1A		R-HSA-3788705;R-HSA-4647613;R-HSA-69562;R-HSA-3786258;R-HSA-187934;R-HSA-4647594;R-HSA-3788708;R-HSA-4647593
R-HSA-1592389	Activation of Matrix Metalloproteinases	1	35	0.0023172669491525423	0.06939338844446907	0.10139420804110255	2	27	0.0019573727707699	9606	Homo sapiens	MMP11		R-HSA-1592297;R-HSA-1602484
R-HSA-6785807	Interleukin-4 and Interleukin-13 signaling	2	211	0.013969809322033898	0.06949732499004402	0.10139420804110255	1	47	0.003407278526895752	9606	Homo sapiens	CDKN1A		R-HSA-6790041
R-HSA-69275	G2/M Transition	2	212	0.014036016949152543	0.07007012421555425	0.10139420804110255	15	78	0.005654632448890822	9606	Homo sapiens	CDKN1A;MAPRE1		R-HSA-380455;R-HSA-380294;R-HSA-380303;R-HSA-8853419;R-HSA-8852362;R-HSA-8852298;R-HSA-380311;R-HSA-3000319;R-HSA-380272;R-HSA-8852306;R-HSA-8853405;R-HSA-2574845;R-HSA-3000310;R-HSA-380283;R-HSA-2574840
R-HSA-453274	Mitotic G2-G2/M phases	2	214	0.014168432203389831	0.07122048018045846	0.10139420804110255	15	80	0.005799623024503407	9606	Homo sapiens	CDKN1A;MAPRE1		R-HSA-380455;R-HSA-380294;R-HSA-380303;R-HSA-8853419;R-HSA-8852362;R-HSA-8852298;R-HSA-380311;R-HSA-3000319;R-HSA-380272;R-HSA-8852306;R-HSA-8853405;R-HSA-2574845;R-HSA-3000310;R-HSA-380283;R-HSA-2574840
R-HSA-9687139	Aberrant regulation of mitotic cell cycle due to RB1 defects	1	36	0.0023834745762711866	0.07130593119203954	0.10139420804110255	1	3	2.1748586341887777E-4	9606	Homo sapiens	CDKN1A		R-HSA-9659782
R-HSA-193807	Synthesis of bile acids and bile salts via 27-hydroxycholesterol	1	36	0.0023834745762711866	0.07130593119203954	0.10139420804110255	2	12	8.699434536755111E-4	9606	Homo sapiens	AKR1D1		R-HSA-193824;R-HSA-193821
R-HSA-9609690	HCMV Early Events	2	215	0.014234639830508475	0.07179802009659553	0.10139420804110255	2	12	8.699434536755111E-4	9606	Homo sapiens	DYNC1LI1		R-HSA-9614343;R-HSA-9614367
R-HSA-8963693	Aspartate and asparagine metabolism	1	37	0.0024496822033898305	0.07321466990441128	0.10139420804110255	1	11	7.974481658692185E-4	9606	Homo sapiens	ASPA		R-HSA-5691507
R-HSA-6811442	Intra-Golgi and retrograde Golgi-to-ER traffic	2	219	0.01449947033898305	0.07412373091690805	0.10139420804110255	2	48	0.0034797738147020443	9606	Homo sapiens	DYNC1LI1		R-HSA-8849350;R-HSA-8849353
R-HSA-948021	Transport to the Golgi and subsequent modification	2	219	0.01449947033898305	0.07412373091690805	0.10139420804110255	2	60	0.004349717268377556	9606	Homo sapiens	DYNC1LI1		R-HSA-6809006;R-HSA-6809003
R-HSA-9675126	Diseases of mitotic cell cycle	1	38	0.0025158898305084744	0.07511961189606386	0.10139420804110255	1	5	3.6247643903146296E-4	9606	Homo sapiens	CDKN1A		R-HSA-9659782
R-HSA-8868766	rRNA processing in the mitochondrion	1	40	0.0026483050847457626	0.07891813490725708	0.10139420804110255	1	6	4.3497172683775554E-4	9606	Homo sapiens	MT-ATP8		R-HSA-6785722
R-HSA-5663213	RHO GTPases Activate WASPs and WAVEs	1	41	0.002714512711864407	0.08081173048794965	0.10139420804110255	5	10	7.249528780629259E-4	9606	Homo sapiens	NCK1		R-HSA-2197698;R-HSA-2029466;R-HSA-442592;R-HSA-2197691;R-HSA-2197690
R-HSA-376176	Signaling by ROBO receptors	2	235	0.015558792372881356	0.08366619334845549	0.10139420804110255	5	60	0.004349717268377556	9606	Homo sapiens	NCK1		R-HSA-428535;R-HSA-428515;R-HSA-428531;R-HSA-428511;R-HSA-8985812
R-HSA-140877	Formation of Fibrin Clot (Clotting Cascade)	1	43	0.0028469279661016947	0.08458762610107418	0.10139420804110255	1	61	0.004422212556183848	9606	Homo sapiens	PZP		R-HSA-158340
R-HSA-8948216	Collagen chain trimerization	1	44	0.002913135593220339	0.08646994061369162	0.10139420804110255	1	28	0.0020298680585761927	9606	Homo sapiens	COL10A1		R-HSA-8944262
R-HSA-6785470	tRNA processing in the mitochondrion	1	45	0.002979343220338983	0.08834850922805437	0.10139420804110255	1	3	2.1748586341887777E-4	9606	Homo sapiens	MT-ATP8		R-HSA-6785722
R-HSA-193775	Synthesis of bile acids and bile salts via 24-hydroxycholesterol	1	45	0.002979343220338983	0.08834850922805437	0.10139420804110255	2	28	0.0020298680585761927	9606	Homo sapiens	AKR1D1		R-HSA-193746;R-HSA-193755
R-HSA-445355	Smooth Muscle Contraction	1	49	0.0032441737288135594	0.09582546863263963	0.10139420804110255	4	11	7.974481658692185E-4	9606	Homo sapiens	SORBS1		R-HSA-445700;R-HSA-445699;R-HSA-445704;R-HSA-445705
R-HSA-69236	G1 Phase	1	52	0.0034427966101694915	0.10139420804110255	0.10139420804110255	8	17	0.001232419892706974	9606	Homo sapiens	CDKN1A		R-HSA-8941915;R-HSA-8942607;R-HSA-9018017;R-HSA-69227;R-HSA-8942803;R-HSA-1226094;R-HSA-8942836;R-HSA-1226095
R-HSA-69231	Cyclin D associated events in G1	1	52	0.0034427966101694915	0.10139420804110255	0.10139420804110255	8	17	0.001232419892706974	9606	Homo sapiens	CDKN1A		R-HSA-8941915;R-HSA-8942607;R-HSA-9018017;R-HSA-69227;R-HSA-8942803;R-HSA-1226094;R-HSA-8942836;R-HSA-1226095
R-HSA-9609646	HCMV Infection	2	270	0.0178760593220339	0.10574822367762926	0.10574822367762926	2	31	0.0022473539219950702	9606	Homo sapiens	DYNC1LI1		R-HSA-9614343;R-HSA-9614367
R-HSA-202433	Generation of second messenger molecules	1	59	0.00390625	0.11425916190142826	0.11425916190142826	3	17	0.001232419892706974	9606	Homo sapiens	NCK1		R-HSA-430183;R-HSA-430180;R-HSA-430190
R-HSA-373752	Netrin-1 signaling	1	59	0.00390625	0.11425916190142826	0.11425916190142826	6	37	0.0026823256488328257	9606	Homo sapiens	NCK1		R-HSA-373716;R-HSA-418850;R-HSA-418865;R-HSA-418874;R-HSA-418858;R-HSA-418856
R-HSA-3000171	Non-integrin membrane-ECM interactions	1	61	0.004038665254237288	0.11790200465270051	0.11790200465270051	1	22	0.001594896331738437	9606	Homo sapiens	COL10A1		R-HSA-2465890
R-HSA-187577	SCF(Skp2)-mediated degradation of p27/p21	1	62	0.0041048728813559325	0.11971798474288109	0.11971798474288109	4	7	5.074670146440482E-4	9606	Homo sapiens	CDKN1A		R-HSA-187520;R-HSA-187552;R-HSA-187574;R-HSA-187575
R-HSA-9662361	Sensory processing of sound by outer hair cells of the cochlea	1	64	0.00423728813559322	0.12333909726319148	0.12333909726319148	1	8	5.799623024503408E-4	9606	Homo sapiens	MYO3B		R-HSA-9663363
R-HSA-211945	Phase I - Functionalization of compounds	2	299	0.019796080508474576	0.1251183202696473	0.1251183202696473	1	98	0.007104538205016674	9606	Homo sapiens	CES2		R-HSA-5693691
R-HSA-2022090	Assembly of collagen fibrils and other multimeric structures	1	67	0.004435911016949153	0.12874375123703707	0.12874375123703707	2	26	0.0018848774829636073	9606	Homo sapiens	COL10A1		R-HSA-2213207;R-HSA-2213208
R-HSA-380284	Loss of proteins required for interphase microtubule organization from the centrosome	1	71	0.004700741525423728	0.13589981970214016	0.13589981970214016	3	3	2.1748586341887777E-4	9606	Homo sapiens	MAPRE1		R-HSA-380294;R-HSA-380272;R-HSA-380303
R-HSA-380259	Loss of Nlp from mitotic centrosomes	1	71	0.004700741525423728	0.13589981970214016	0.13589981970214016	2	2	1.449905756125852E-4	9606	Homo sapiens	MAPRE1		R-HSA-380272;R-HSA-380303
R-HSA-9616222	Transcriptional regulation of granulopoiesis	1	71	0.004700741525423728	0.13589981970214016	0.13589981970214016	1	27	0.0019573727707699	9606	Homo sapiens	CDKN1A		R-HSA-9624668
R-HSA-5690714	CD22 mediated BCR regulation	1	72	0.004766949152542373	0.1376799297576844	0.1376799297576844	3	4	2.899811512251704E-4	9606	Homo sapiens	IGLV3-21		R-HSA-5690740;R-HSA-5690702;R-HSA-5690701
R-HSA-8854518	AURKA Activation by TPX2	1	74	0.004899364406779661	0.14122950941422618	0.14122950941422618	2	2	1.449905756125852E-4	9606	Homo sapiens	MAPRE1		R-HSA-8853405;R-HSA-8853419
R-HSA-1650814	Collagen biosynthesis and modifying enzymes	1	76	0.005031779661016949	0.14476494733847745	0.14476494733847745	19	51	0.0036972596781209223	9606	Homo sapiens	COL10A1		R-HSA-8948232;R-HSA-1650808;R-HSA-2002460;R-HSA-8948234;R-HSA-2022073;R-HSA-8948224;R-HSA-8948226;R-HSA-2089971;R-HSA-8948228;R-HSA-8944262;R-HSA-1981104;R-HSA-8948230;R-HSA-8948231;R-HSA-8948219;R-HSA-1981128;R-HSA-8948222;R-HSA-1980233;R-HSA-1981157;R-HSA-1981120
R-HSA-9662360	Sensory processing of sound by inner hair cells of the cochlea	1	76	0.005031779661016949	0.14476494733847745	0.14476494733847745	1	7	5.074670146440482E-4	9606	Homo sapiens	MYO3B		R-HSA-9659380
R-HSA-2262752	Cellular responses to stress	4	1001	0.0662738347457627	0.1466554752762017	0.1466554752762017	9	444	0.03218790778599391	9606	Homo sapiens	DYNC1LI1;CDKN1A		R-HSA-5618080;R-HSA-3788705;R-HSA-4647613;R-HSA-69562;R-HSA-3786258;R-HSA-187934;R-HSA-4647594;R-HSA-3788708;R-HSA-4647593
R-HSA-193368	Synthesis of bile acids and bile salts via 7alpha-hydroxycholesterol	1	78	0.005164194915254237	0.14828629800110504	0.14828629800110504	2	39	0.002827316224445411	9606	Homo sapiens	AKR1D1		R-HSA-192067;R-HSA-192033
R-HSA-1834949	Cytosolic sensors of pathogen-associated DNA	1	78	0.005164194915254237	0.14828629800110504	0.14828629800110504	1	50	0.0036247643903146295	9606	Homo sapiens	NLRC3		R-HSA-1834939
R-HSA-1280218	Adaptive Immune System	4	1012	0.0670021186440678	0.1508695570270473	0.1508695570270473	18	264	0.019138755980861243	9606	Homo sapiens	DYNC1LI1;IGLV3-21;NCK1		R-HSA-9606162;R-HSA-9606163;R-HSA-430183;R-HSA-2213248;R-HSA-5690740;R-HSA-430180;R-HSA-430190;R-HSA-1112666;R-HSA-983709;R-HSA-983707;R-HSA-9606151;R-HSA-983703;R-HSA-5690702;R-HSA-199161;R-HSA-983700;R-HSA-5690701;R-HSA-9606159;R-HSA-983696
R-HSA-1852241	Organelle biogenesis and maintenance	2	338	0.022378177966101694	0.15239636894018105	0.15239636894018105	9	86	0.0062345947513411624	9606	Homo sapiens	MAPRE1;MT-ATP8		R-HSA-5626228;R-HSA-8949580;R-HSA-5626227;R-HSA-5626220;R-HSA-5626223;R-HSA-5626681;R-HSA-5617816;R-HSA-5626699;R-HSA-5638009
R-HSA-380270	Recruitment of mitotic centrosome proteins and complexes	1	81	0.005362817796610169	0.15354202903569858	0.15354202903569858	3	3	2.1748586341887777E-4	9606	Homo sapiens	MAPRE1		R-HSA-380311;R-HSA-380455;R-HSA-380283
R-HSA-8953897	Cellular responses to stimuli	4	1019	0.0674655720338983	0.1535767607615649	0.1535767607615649	9	475	0.03443526170798898	9606	Homo sapiens	DYNC1LI1;CDKN1A		R-HSA-5618080;R-HSA-3788705;R-HSA-4647613;R-HSA-69562;R-HSA-3786258;R-HSA-187934;R-HSA-4647594;R-HSA-3788708;R-HSA-4647593
R-HSA-380287	Centrosome maturation	1	83	0.005495233050847458	0.1570283985256894	0.1570283985256894	6	6	4.3497172683775554E-4	9606	Homo sapiens	MAPRE1		R-HSA-380311;R-HSA-380455;R-HSA-380294;R-HSA-380272;R-HSA-380303;R-HSA-380283
R-HSA-216083	Integrin cell surface interactions	1	86	0.005693855932203389	0.1622319103730937	0.1622319103730937	1	55	0.003987240829346092	9606	Homo sapiens	COL10A1		R-HSA-2470555
R-HSA-9659379	Sensory processing of sound	1	87	0.005760063559322034	0.16395949645540386	0.16395949645540386	2	13	9.424387414818037E-4	9606	Homo sapiens	MYO3B		R-HSA-9663363;R-HSA-9659380
R-HSA-69202	Cyclin E associated events during G1/S transition	1	88	0.005826271186440678	0.16568363472207326	0.16568363472207326	7	20	0.0014499057561258518	9606	Homo sapiens	CDKN1A		R-HSA-187520;R-HSA-187552;R-HSA-187574;R-HSA-187575;R-HSA-187828;R-HSA-198613;R-HSA-69562
R-HSA-69656	Cyclin A:Cdk2-associated events at S phase entry	1	90	0.005958686440677966	0.1691215944042085	0.1691215944042085	8	19	0.0013774104683195593	9606	Homo sapiens	CDKN1A		R-HSA-187520;R-HSA-187552;R-HSA-187574;R-HSA-187575;R-HSA-187828;R-HSA-198613;R-HSA-187934;R-HSA-187916
R-HSA-2559582	Senescence-Associated Secretory Phenotype (SASP)	1	91	0.006024894067796611	0.17083542908657112	0.17083542908657112	2	22	0.001594896331738437	9606	Homo sapiens	CDKN1A		R-HSA-3788705;R-HSA-3788708
R-HSA-2565942	Regulation of PLK1 Activity at G2/M Transition	1	92	0.0060911016949152545	0.17254584248713656	0.17254584248713656	4	12	8.699434536755111E-4	9606	Homo sapiens	MAPRE1		R-HSA-3000319;R-HSA-2574845;R-HSA-3000310;R-HSA-2574840
R-HSA-380320	Recruitment of NuMA to mitotic centrosomes	1	97	0.006422139830508475	0.18104682092354596	0.18104682092354596	2	2	1.449905756125852E-4	9606	Homo sapiens	MAPRE1		R-HSA-380316;R-HSA-380508
R-HSA-173623	Classical antibody-mediated complement activation	1	97	0.006422139830508475	0.18104682092354596	0.18104682092354596	2	2	1.449905756125852E-4	9606	Homo sapiens	IGLV3-21		R-HSA-173626;R-HSA-173631
R-HSA-5620912	Anchoring of the basal body to the plasma membrane	1	99	0.006554555084745763	0.1844234934709894	0.1844234934709894	8	9	6.524575902566333E-4	9606	Homo sapiens	MAPRE1		R-HSA-5626228;R-HSA-5626227;R-HSA-5626220;R-HSA-5626223;R-HSA-5626681;R-HSA-5617816;R-HSA-5626699;R-HSA-5638009
R-HSA-2682334	EPH-Ephrin signaling	1	102	0.006753177966101695	0.1894632524912766	0.1894632524912766	7	56	0.0040597361171523854	9606	Homo sapiens	NCK1		R-HSA-3928633;R-HSA-3928639;R-HSA-3928625;R-HSA-3928641;R-HSA-3928640;R-HSA-3928631;R-HSA-3928614
R-HSA-174824	Plasma lipoprotein assembly, remodeling, and clearance	1	102	0.006753177966101695	0.1894632524912766	0.1894632524912766	1	85	0.00616209946353487	9606	Homo sapiens	PZP		R-HSA-264758
R-HSA-2029481	FCGR activation	1	103	0.006819385593220339	0.19113646486724367	0.19113646486724367	6	6	4.3497172683775554E-4	9606	Homo sapiens	IGLV3-21		R-HSA-2029455;R-HSA-2029452;R-HSA-2029449;R-HSA-1861621;R-HSA-2029459;R-HSA-2029457
R-HSA-1474290	Collagen formation	1	104	0.006885593220338983	0.1928063343853199	0.1928063343853199	21	77	0.005582137161084529	9606	Homo sapiens	COL10A1		R-HSA-8948232;R-HSA-1650808;R-HSA-2002460;R-HSA-8948234;R-HSA-2022073;R-HSA-8948224;R-HSA-8948226;R-HSA-2089971;R-HSA-8948228;R-HSA-8944262;R-HSA-1981104;R-HSA-8948230;R-HSA-8948231;R-HSA-8948219;R-HSA-2213207;R-HSA-1981128;R-HSA-8948222;R-HSA-1980233;R-HSA-2213208;R-HSA-1981157;R-HSA-1981120
R-HSA-2168880	Scavenging of heme from plasma	1	106	0.007018008474576272	0.19613607066136796	0.19613607066136796	1	12	8.699434536755111E-4	9606	Homo sapiens	IGLV3-21		R-HSA-2203516
R-HSA-5687128	MAPK6/MAPK4 signaling	1	106	0.007018008474576272	0.19613607066136796	0.19613607066136796	2	40	0.0028998115122517037	9606	Homo sapiens	SEPTIN7		R-HSA-5692775;R-HSA-5692770
R-HSA-2730905	Role of LAT2/NTAL/LAB on calcium mobilization	1	107	0.0070842161016949155	0.19779595029604213	0.19779595029604213	2	7	5.074670146440482E-4	9606	Homo sapiens	IGLV3-21		R-HSA-2730860;R-HSA-2730884
R-HSA-9658195	Leishmania infection	2	406	0.026880296610169493	0.20236528623309336	0.20236528623309336	22	95	0.006887052341597796	9606	Homo sapiens	IGLV3-21;NCK1		R-HSA-9664275;R-HSA-9664273;R-HSA-2197698;R-HSA-2029466;R-HSA-9664278;R-HSA-9664406;R-HSA-442592;R-HSA-9666426;R-HSA-9666458;R-HSA-9666425;R-HSA-9666430;R-HSA-9664285;R-HSA-9666428;R-HSA-9666435;R-HSA-9666433;R-HSA-9664261;R-HSA-2197691;R-HSA-2197690;R-HSA-9664271;R-HSA-9664270;R-HSA-9664397;R-HSA-9664268
R-HSA-166786	Creation of C4 and C2 activators	1	111	0.007349046610169492	0.20440236181419313	0.20440236181419313	2	8	5.799623024503408E-4	9606	Homo sapiens	IGLV3-21		R-HSA-173626;R-HSA-173631
R-HSA-192105	Synthesis of bile acids and bile salts	1	113	0.00748146186440678	0.20768579278561417	0.20768579278561417	6	83	0.006017108887922285	9606	Homo sapiens	AKR1D1		R-HSA-193746;R-HSA-192067;R-HSA-193824;R-HSA-192033;R-HSA-193755;R-HSA-193821
R-HSA-212436	Generic Transcription Pathway	5	1555	0.10295286016949153	0.2096683946145942	0.2096683946145942	19	830	0.06017108887922285	9606	Homo sapiens	CDKN1A;TNFRSF10C		R-HSA-9008456;R-HSA-9617840;R-HSA-8878178;R-HSA-9618004;R-HSA-8865280;R-HSA-6803403;R-HSA-8878186;R-HSA-8865256;R-HSA-5633414;R-HSA-5633441;R-HSA-6803411;R-HSA-8878130;R-HSA-9008433;R-HSA-69562;R-HSA-6803388;R-HSA-8865244;R-HSA-187934;R-HSA-9617838;R-HSA-6803801
R-HSA-446203	Asparagine N-linked glycosylation	2	421	0.02787341101694915	0.21366937675922593	0.21366937675922593	2	144	0.010439321444106133	9606	Homo sapiens	DYNC1LI1		R-HSA-6809006;R-HSA-6809003
R-HSA-166663	Initial triggering of complement	1	120	0.007944915254237288	0.21907484976450176	0.21907484976450176	4	21	0.0015224010439321444	9606	Homo sapiens	IGLV3-21		R-HSA-166753;R-HSA-173626;R-HSA-166792;R-HSA-173631
R-HSA-2871796	FCERI mediated MAPK activation	1	124	0.008209745762711865	0.22551157993615012	0.22551157993615012	2	20	0.0014499057561258518	9606	Homo sapiens	IGLV3-21		R-HSA-2730851;R-HSA-2730886
R-HSA-2219528	PI3K/AKT Signaling in Cancer	1	124	0.008209745762711865	0.22551157993615012	0.22551157993615012	1	21	0.0015224010439321444	9606	Homo sapiens	CDKN1A		R-HSA-2399969
R-HSA-194068	Bile acid and bile salt metabolism	1	125	0.008275953389830509	0.2271127224817252	0.2271127224817252	6	99	0.007177033492822967	9606	Homo sapiens	AKR1D1		R-HSA-193746;R-HSA-192067;R-HSA-193824;R-HSA-192033;R-HSA-193755;R-HSA-193821
R-HSA-2980736	Peptide hormone metabolism	1	127	0.008408368644067797	0.23030540307307523	0.23030540307307523	1	63	0.004567203131796433	9606	Homo sapiens	CES2		R-HSA-9619024
R-HSA-1592230	Mitochondrial biogenesis	1	128	0.00847457627118644	0.23189695350017892	0.23189695350017892	1	36	0.0026098303610265334	9606	Homo sapiens	MT-ATP8		R-HSA-8949580
R-HSA-2029485	Role of phospholipids in phagocytosis	1	129	0.008540783898305085	0.23348531891651836	0.23348531891651836	5	12	8.699434536755111E-4	9606	Homo sapiens	IGLV3-21		R-HSA-2029272;R-HSA-2029273;R-HSA-2029270;R-HSA-2029271;R-HSA-2029268
R-HSA-2871809	FCERI mediated Ca+2 mobilization	1	129	0.008540783898305085	0.23348531891651836	0.23348531891651836	2	11	7.974481658692185E-4	9606	Homo sapiens	IGLV3-21		R-HSA-2730888;R-HSA-2730833
R-HSA-5653656	Vesicle-mediated transport	3	828	0.05481991525423729	0.24027181186391822	0.24027181186391822	5	252	0.01826881252718573	9606	Homo sapiens	DYNC1LI1;IGLV3-21		R-HSA-8849350;R-HSA-6809006;R-HSA-6809003;R-HSA-2203516;R-HSA-8849353
R-HSA-9012999	RHO GTPase cycle	2	460	0.03045550847457627	0.24334436752437483	0.24334436752437483	2	91	0.006597071190372626	9606	Homo sapiens	NCK1		R-HSA-9018794;R-HSA-9018766
R-HSA-977606	Regulation of Complement cascade	1	139	0.009202860169491525	0.24919514740112925	0.24919514740112925	3	42	0.003044802087864289	9606	Homo sapiens	IGLV3-21		R-HSA-9021306;R-HSA-8852481;R-HSA-8852266
R-HSA-9664323	FCGR3A-mediated IL10 synthesis	1	141	0.009335275423728813	0.252299504485192	0.252299504485192	9	20	0.0014499057561258518	9606	Homo sapiens	IGLV3-21		R-HSA-9664275;R-HSA-9664273;R-HSA-9664278;R-HSA-9664261;R-HSA-9664271;R-HSA-9664270;R-HSA-9664397;R-HSA-9664285;R-HSA-9664268
R-HSA-114608	Platelet degranulation	1	141	0.009335275423728813	0.252299504485192	0.252299504485192	1	11	7.974481658692185E-4	9606	Homo sapiens	PZP		R-HSA-481007
R-HSA-202403	TCR signaling	1	147	0.009732521186440678	0.2615382285662661	0.2615382285662661	3	52	0.0037697549659272147	9606	Homo sapiens	NCK1		R-HSA-430183;R-HSA-430180;R-HSA-430190
R-HSA-76005	Response to elevated platelet cytosolic Ca2+	1	148	0.009798728813559322	0.2630672364968064	0.2630672364968064	1	14	0.0010149340292880964	9606	Homo sapiens	PZP		R-HSA-481007
R-HSA-73857	RNA Polymerase II Transcription	5	1697	0.11235434322033898	0.2651145375004482	0.2651145375004482	19	891	0.0645933014354067	9606	Homo sapiens	CDKN1A;TNFRSF10C		R-HSA-9008456;R-HSA-9617840;R-HSA-8878178;R-HSA-9618004;R-HSA-8865280;R-HSA-6803403;R-HSA-8878186;R-HSA-8865256;R-HSA-5633414;R-HSA-5633441;R-HSA-6803411;R-HSA-8878130;R-HSA-9008433;R-HSA-69562;R-HSA-6803388;R-HSA-8865244;R-HSA-187934;R-HSA-9617838;R-HSA-6803801
R-HSA-69206	G1/S Transition	1	150	0.00993114406779661	0.2661160664781077	0.2661160664781077	7	61	0.004422212556183848	9606	Homo sapiens	CDKN1A		R-HSA-187520;R-HSA-187552;R-HSA-187574;R-HSA-187575;R-HSA-187828;R-HSA-198613;R-HSA-69562
R-HSA-163200	Respiratory electron transport, ATP synthesis by chemiosmotic coupling, and heat production by uncoupling proteins.	1	153	0.010129766949152543	0.2706664356164581	0.2706664356164581	3	31	0.0022473539219950702	9606	Homo sapiens	MT-ATP8		R-HSA-164834;R-HSA-164832;R-HSA-164840
R-HSA-5663202	Diseases of signal transduction by growth factor receptors and second messengers	2	498	0.03297139830508475	0.27247929636468626	0.27247929636468626	3	478	0.034652747571407856	9606	Homo sapiens	CDKN1A		R-HSA-2399969;R-HSA-9698043;R-HSA-9698041
R-HSA-166658	Complement cascade	1	156	0.010328389830508475	0.2751894953422197	0.2751894953422197	7	71	0.005147165434246774	9606	Homo sapiens	IGLV3-21		R-HSA-166753;R-HSA-9021306;R-HSA-8852481;R-HSA-173626;R-HSA-166792;R-HSA-8852266;R-HSA-173631
R-HSA-2173782	Binding and Uptake of Ligands by Scavenger Receptors	1	168	0.011122881355932203	0.2930117961894215	0.2930117961894215	1	33	0.0023923444976076554	9606	Homo sapiens	IGLV3-21		R-HSA-2203516
R-HSA-168249	Innate Immune System	4	1338	0.08858580508474577	0.2932654703381272	0.2932654703381272	46	710	0.05147165434246774	9606	Homo sapiens	DYNC1LI1;IGLV3-21;NLRC3;NCK1		R-HSA-9725206;R-HSA-2029466;R-HSA-2730860;R-HSA-2029467;R-HSA-2454240;R-HSA-8852481;R-HSA-2029272;R-HSA-2029273;R-HSA-2029270;R-HSA-2029271;R-HSA-166792;R-HSA-2029268;R-HSA-2730851;R-HSA-2029458;R-HSA-2029459;R-HSA-6800426;R-HSA-2029457;R-HSA-2029455;R-HSA-2029452;R-HSA-2029453;R-HSA-2029451;R-HSA-2454192;R-HSA-2029449;R-HSA-9724685;R-HSA-2197691;R-HSA-2197690;R-HSA-2197697;R-HSA-1834939;R-HSA-27…
R-HSA-453279	Mitotic G1 phase and G1/S transition	1	174	0.011520127118644068	0.30176316835172656	0.30176316835172656	15	101	0.007322024068435551	9606	Homo sapiens	CDKN1A		R-HSA-187520;R-HSA-187552;R-HSA-8942607;R-HSA-9018017;R-HSA-69227;R-HSA-8941915;R-HSA-187574;R-HSA-187575;R-HSA-187828;R-HSA-198613;R-HSA-8942803;R-HSA-69562;R-HSA-1226094;R-HSA-8942836;R-HSA-1226095
R-HSA-2871837	FCERI mediated NF-kB activation	1	175	0.011586334745762712	0.3032115011734199	0.3032115011734199	1	19	0.0013774104683195593	9606	Homo sapiens	IGLV3-21		R-HSA-2730882
R-HSA-69242	S Phase	1	179	0.011851165254237288	0.3089758136399935	0.3089758136399935	8	55	0.003987240829346092	9606	Homo sapiens	CDKN1A		R-HSA-187520;R-HSA-187552;R-HSA-187574;R-HSA-187575;R-HSA-187828;R-HSA-198613;R-HSA-187934;R-HSA-187916
R-HSA-168256	Immune System	7	2691	0.1781647245762712	0.30931118709063465	0.30931118709063465	65	1625	0.11780484268522547	9606	Homo sapiens	DYNC1LI1;CDKN1A;IGLV3-21;NLRC3;NCK1		R-HSA-9606162;R-HSA-9606163;R-HSA-9725206;R-HSA-2029466;R-HSA-2029467;R-HSA-8852481;R-HSA-166792;R-HSA-2029458;R-HSA-2029459;R-HSA-2029457;R-HSA-2029455;R-HSA-983709;R-HSA-2029452;R-HSA-2029453;R-HSA-983707;R-HSA-9606151;R-HSA-2029451;R-HSA-2454192;R-HSA-2029449;R-HSA-983703;R-HSA-5690702;R-HSA-9724685;R-HSA-2197691;R-HSA-983700;R-HSA-5690701;R-HSA-2197690;R-HSA-9606159;R-HSA-983696;R-HSA-1834939…
R-HSA-211859	Biological oxidations	2	549	0.03634798728813559	0.31159405482499203	0.31159405482499203	1	188	0.013629114107583008	9606	Homo sapiens	CES2		R-HSA-5693691
R-HSA-72306	tRNA processing	1	184	0.012182203389830509	0.31611633309824116	0.31611633309824116	1	54	0.0039147455415398	9606	Homo sapiens	MT-ATP8		R-HSA-6785722
R-HSA-74160	Gene expression (Transcription)	5	1860	0.12314618644067797	0.33285984047967754	0.33285984047967754	19	1006	0.07293025953313034	9606	Homo sapiens	CDKN1A;TNFRSF10C		R-HSA-9008456;R-HSA-9617840;R-HSA-8878178;R-HSA-9618004;R-HSA-8865280;R-HSA-6803403;R-HSA-8878186;R-HSA-8865256;R-HSA-5633414;R-HSA-5633441;R-HSA-6803411;R-HSA-8878130;R-HSA-9008433;R-HSA-69562;R-HSA-6803388;R-HSA-8865244;R-HSA-187934;R-HSA-9617838;R-HSA-6803801
R-HSA-422475	Axon guidance	2	585	0.03873146186440678	0.33902313301973575	0.33902313301973575	18	298	0.021603595766275192	9606	Homo sapiens	NCK1		R-HSA-3928633;R-HSA-418850;R-HSA-3928639;R-HSA-428515;R-HSA-3928625;R-HSA-418858;R-HSA-3928631;R-HSA-418856;R-HSA-373716;R-HSA-428535;R-HSA-428531;R-HSA-418865;R-HSA-428511;R-HSA-3928641;R-HSA-3928640;R-HSA-418874;R-HSA-8985812;R-HSA-3928614
R-HSA-5617833	Cilium Assembly	1	210	0.013903601694915254	0.3521110854930799	0.3521110854930799	8	50	0.0036247643903146295	9606	Homo sapiens	MAPRE1		R-HSA-5626228;R-HSA-5626227;R-HSA-5626220;R-HSA-5626223;R-HSA-5626681;R-HSA-5617816;R-HSA-5626699;R-HSA-5638009
R-HSA-397014	Muscle contraction	1	213	0.014102224576271187	0.35614438585143016	0.35614438585143016	4	42	0.003044802087864289	9606	Homo sapiens	SORBS1		R-HSA-445700;R-HSA-445699;R-HSA-445704;R-HSA-445705
R-HSA-9006934	Signaling by Receptor Tyrosine Kinases	2	620	0.041048728813559324	0.36542107464364193	0.36542107464364193	10	746	0.054081484703494276	9606	Homo sapiens	NCK1		R-HSA-5218815;R-HSA-5218847;R-HSA-5218814;R-HSA-5218812;R-HSA-5218824;R-HSA-5218806;R-HSA-5218854;R-HSA-5218804;R-HSA-5218832;R-HSA-382058
R-HSA-9675108	Nervous system development	2	621	0.041114936440677964	0.36617046066638714	0.36617046066638714	18	324	0.0234884732492388	9606	Homo sapiens	NCK1		R-HSA-3928633;R-HSA-418850;R-HSA-3928639;R-HSA-428515;R-HSA-3928625;R-HSA-418858;R-HSA-3928631;R-HSA-418856;R-HSA-373716;R-HSA-428535;R-HSA-428531;R-HSA-418865;R-HSA-428511;R-HSA-3928641;R-HSA-3928640;R-HSA-418874;R-HSA-8985812;R-HSA-3928614
R-HSA-449147	Signaling by Interleukins	2	645	0.042703919491525424	0.3840632806747488	0.3840632806747488	1	493	0.03574017688850225	9606	Homo sapiens	CDKN1A		R-HSA-6790041
R-HSA-2454202	Fc epsilon receptor (FCERI) signaling	1	235	0.015558792372881356	0.3849883826351084	0.3849883826351084	14	65	0.0047121937074090185	9606	Homo sapiens	IGLV3-21		R-HSA-2730888;R-HSA-9725206;R-HSA-2730860;R-HSA-2454240;R-HSA-2454208;R-HSA-2730851;R-HSA-2730882;R-HSA-2730884;R-HSA-2730886;R-HSA-2730843;R-HSA-2454192;R-HSA-2730833;R-HSA-9724685;R-HSA-2454239
R-HSA-1428517	The citric acid (TCA) cycle and respiratory electron transport	1	238	0.015757415254237288	0.38882342988549157	0.38882342988549157	3	67	0.004857184283021603	9606	Homo sapiens	MT-ATP8		R-HSA-164834;R-HSA-164832;R-HSA-164840
R-HSA-72312	rRNA processing	1	246	0.016287076271186442	0.39893742328639104	0.39893742328639104	1	21	0.0015224010439321444	9606	Homo sapiens	MT-ATP8		R-HSA-6785722
R-HSA-199991	Membrane Trafficking	2	668	0.04422669491525424	0.4010285719426415	0.4010285719426415	4	219	0.015876468029578077	9606	Homo sapiens	DYNC1LI1		R-HSA-8849350;R-HSA-6809006;R-HSA-6809003;R-HSA-8849353
R-HSA-5663205	Infectious disease	4	1574	0.10421080508474577	0.40695757247492925	0.40695757247492925	24	825	0.05980861244019139	9606	Homo sapiens	DYNC1LI1;IGLV3-21;NCK1		R-HSA-9664275;R-HSA-9664273;R-HSA-2197698;R-HSA-2029466;R-HSA-9664278;R-HSA-9664406;R-HSA-442592;R-HSA-9666458;R-HSA-9666426;R-HSA-9666425;R-HSA-9614367;R-HSA-9666430;R-HSA-9664285;R-HSA-9666428;R-HSA-9666435;R-HSA-9666433;R-HSA-9614343;R-HSA-9664261;R-HSA-2197691;R-HSA-2197690;R-HSA-9664271;R-HSA-9664270;R-HSA-9664397;R-HSA-9664268
R-HSA-202733	Cell surface interactions at the vascular wall	1	257	0.017015360169491525	0.4125800677150002	0.4125800677150002	1	65	0.0047121937074090185	9606	Homo sapiens	IGLV3-21		R-HSA-8858428
R-HSA-162582	Signal Transduction	7	3013	0.1994835805084746	0.42604866507561057	0.42604866507561057	23	2465	0.17870088444251123	9606	Homo sapiens	DYNC1LI1;CDKN1A;MAPRE1;SEPTIN7;NCK1		R-HSA-9018794;R-HSA-2197698;R-HSA-2029466;R-HSA-442592;R-HSA-5666160;R-HSA-5218824;R-HSA-9018766;R-HSA-5666129;R-HSA-5218854;R-HSA-382058;R-HSA-5666169;R-HSA-5218815;R-HSA-5218847;R-HSA-5218814;R-HSA-5692775;R-HSA-5218812;R-HSA-5692770;R-HSA-198613;R-HSA-5218806;R-HSA-2197691;R-HSA-5218804;R-HSA-2197690;R-HSA-5218832
R-HSA-76002	Platelet activation, signaling and aggregation	1	293	0.019398834745762712	0.4551655572331942	0.4551655572331942	1	116	0.00840945338552994	9606	Homo sapiens	PZP		R-HSA-481007
R-HSA-9664433	Leishmania parasite growth and survival	1	297	0.019663665254237288	0.45970856565451523	0.45970856565451523	9	40	0.0028998115122517037	9606	Homo sapiens	IGLV3-21		R-HSA-9664275;R-HSA-9664273;R-HSA-9664278;R-HSA-9664261;R-HSA-9664271;R-HSA-9664270;R-HSA-9664397;R-HSA-9664285;R-HSA-9664268
R-HSA-9662851	Anti-inflammatory response favouring Leishmania parasite infection	1	297	0.019663665254237288	0.45970856565451523	0.45970856565451523	9	40	0.0028998115122517037	9606	Homo sapiens	IGLV3-21		R-HSA-9664275;R-HSA-9664273;R-HSA-9664278;R-HSA-9664261;R-HSA-9664271;R-HSA-9664270;R-HSA-9664397;R-HSA-9664285;R-HSA-9664268
R-HSA-1643685	Disease	6	2651	0.1755164194915254	0.4681292196033544	0.4681292196033544	28	1708	0.12382195157314775	9606	Homo sapiens	DYNC1LI1;CDKN1A;IGLV3-21;NCK1		R-HSA-9664275;R-HSA-9664273;R-HSA-2029466;R-HSA-9664278;R-HSA-9664406;R-HSA-2399969;R-HSA-9666458;R-HSA-9614367;R-HSA-9664285;R-HSA-9666435;R-HSA-9666433;R-HSA-9614343;R-HSA-9659782;R-HSA-9664261;R-HSA-2197691;R-HSA-2197690;R-HSA-9664271;R-HSA-9664270;R-HSA-9664397;R-HSA-9664268;R-HSA-2197698;R-HSA-442592;R-HSA-9698043;R-HSA-9666426;R-HSA-9666425;R-HSA-9698041;R-HSA-9666430;R-HSA-9666428
R-HSA-198933	Immunoregulatory interactions between a Lymphoid and a non-Lymphoid cell	1	316	0.020921610169491525	0.48079195472561687	0.48079195472561687	1	44	0.003189792663476874	9606	Homo sapiens	IGLV3-21		R-HSA-199161
R-HSA-1266738	Developmental Biology	3	1263	0.08362023305084745	0.48611134918152743	0.48611134918152743	19	556	0.04030738002029868	9606	Homo sapiens	CDKN1A;NCK1		R-HSA-3928633;R-HSA-418850;R-HSA-3928639;R-HSA-428515;R-HSA-3928625;R-HSA-418858;R-HSA-3928631;R-HSA-418856;R-HSA-9624668;R-HSA-373716;R-HSA-428535;R-HSA-428531;R-HSA-418865;R-HSA-428511;R-HSA-3928641;R-HSA-3928640;R-HSA-418874;R-HSA-8985812;R-HSA-3928614
R-HSA-1257604	PIP3 activates AKT signaling	1	321	0.021252648305084745	0.486206508624885	0.486206508624885	1	86	0.0062345947513411624	9606	Homo sapiens	CDKN1A		R-HSA-198613
R-HSA-109582	Hemostasis	2	803	0.05316472457627119	0.49608126849012457	0.49608126849012457	3	334	0.024213426127301724	9606	Homo sapiens	IGLV3-21;PZP		R-HSA-158340;R-HSA-481007;R-HSA-8858428
R-HSA-8957322	Metabolism of steroids	1	331	0.021914724576271187	0.49687216244980215	0.49687216244980215	6	245	0.017761345512541684	9606	Homo sapiens	AKR1D1		R-HSA-193746;R-HSA-192067;R-HSA-193824;R-HSA-192033;R-HSA-193755;R-HSA-193821
R-HSA-9006925	Intracellular signaling by second messengers	1	368	0.024364406779661018	0.5345031860251743	0.5345031860251743	1	114	0.008264462809917356	9606	Homo sapiens	CDKN1A		R-HSA-198613
R-HSA-5683057	MAPK family signaling cascades	1	380	0.025158898305084745	0.5461119106144534	0.5461119106144534	2	122	0.008844425112367696	9606	Homo sapiens	SEPTIN7		R-HSA-5692775;R-HSA-5692770
R-HSA-6798695	Neutrophil degranulation	1	480	0.03177966101694915	0.6325483139241065	0.6325483139241065	2	10	7.249528780629259E-4	9606	Homo sapiens	DYNC1LI1		R-HSA-6798743;R-HSA-6800426
R-HSA-1280215	Cytokine Signaling in Immune system	2	1094	0.0724311440677966	0.6674585145014174	0.6674585145014174	1	710	0.05147165434246774	9606	Homo sapiens	CDKN1A		R-HSA-6790041
R-HSA-71291	Metabolism of amino acids and derivatives	1	666	0.04409427966101695	0.7529033393569802	0.7529033393569802	1	285	0.02066115702479339	9606	Homo sapiens	ASPA		R-HSA-5691507
R-HSA-8953854	Metabolism of RNA	1	788	0.052171610169491525	0.8100579610426077	0.8100579610426077	1	187	0.013556618819776715	9606	Homo sapiens	MT-ATP8		R-HSA-6785722
R-HSA-392499	Metabolism of proteins	3	2212	0.1464512711864407	0.852331413734866	0.852331413734866	3	810	0.058721183123097	9606	Homo sapiens	DYNC1LI1;CES2		R-HSA-9619024;R-HSA-6809006;R-HSA-6809003
R-HSA-597592	Post-translational protein modification	2	1605	0.10626324152542373	0.8560258149527292	0.8560258149527292	2	538	0.039002464839785415	9606	Homo sapiens	DYNC1LI1		R-HSA-6809006;R-HSA-6809003
R-HSA-382551	Transport of small molecules	1	965	0.06389036016949153	0.8708399384558423	0.8708399384558423	1	443	0.03211541249818762	9606	Homo sapiens	PZP		R-HSA-264758
R-HSA-1430728	Metabolism	5	3639	0.24092955508474576	0.8987526464962925	0.8987526464962925	11	2250	0.16311439756415833	9606	Homo sapiens	AKR1D1;ASPA;CES2;MT-ATP8		R-HSA-193746;R-HSA-164834;R-HSA-192067;R-HSA-193824;R-HSA-164832;R-HSA-192033;R-HSA-5691507;R-HSA-193755;R-HSA-164840;R-HSA-5693691;R-HSA-193821
R-HSA-9709957	Sensory Perception	1	1262	0.08355402542372882	0.9331174371281549	0.9331174371281549	2	143	0.01036682615629984	9606	Homo sapiens	MYO3B		R-HSA-9663363;R-HSA-9659380
R-HSA-556833	Metabolism of lipids	1	1446	0.09573622881355932	0.95582779548292	0.95582779548292	6	955	0.06923299985500943	9606	Homo sapiens	AKR1D1		R-HSA-193746;R-HSA-192067;R-HSA-193824;R-HSA-192033;R-HSA-193755;R-HSA-193821
