# Supplementary material for: Promitotic Action of Oenothera biennis on Senescent Human Dermal Fibroblasts
Source: Int J Mol Sci. 2022 Dec 2;23(23):15153. doi: 10.3390/ijms232315153 (PMC9735661; doi:10.3390/ijms232315153)
Supplement: Supplementary file 1 [file ijms-23-15153-s001.zip › Table S3. Reactome enrichment analysis of downregulated proteins in H2O2 treated NHDF cells.csv]

Pathway identifier	Pathway name	#Entities found	#Entities total	Entities ratio	Entities pValue	Entities FDR	#Reactions found	#Reactions total	Reactions ratio	Species identifier	Species name	Submitted entities found	Mapped entities	Found reaction identifiers
R-HSA-176974	Unwinding of DNA	6	12	7.944915254237289E-4	2.638944618382766E-11	4.037585266125632E-9	2	4	2.899811512251704E-4	9606	Homo sapiens	MCM7;MCM3;MCM4;MCM5;MCM6;MCM2		R-HSA-176942;R-HSA-169468
R-HSA-68962	Activation of the pre-replicative complex	6	36	0.0023834745762711866	1.76806570495458E-8	1.2160689401019553E-6	8	9	6.524575902566333E-4	9606	Homo sapiens	MCM7;MCM3;MCM4;MCM5;MCM6;MCM2		R-HSA-68960;R-HSA-68914;R-HSA-68917;R-HSA-68916;R-HSA-68919;R-HSA-68918;R-HSA-68954;R-HSA-68940
R-HSA-69190	DNA strand elongation	6	38	0.0025158898305084744	2.428458856229554E-8	1.2160689401019553E-6	2	15	0.001087429317094389	9606	Homo sapiens	MCM7;MCM3;MCM4;MCM5;MCM6;MCM2		R-HSA-176942;R-HSA-169468
R-HSA-176187	Activation of ATR in response to replication stress	6	39	0.0025820974576271187	2.8280673025626868E-8	1.2160689401019553E-6	2	9	6.524575902566333E-4	9606	Homo sapiens	MCM7;MCM3;MCM4;MCM5;MCM6;MCM2		R-HSA-176298;R-HSA-176318
R-HSA-6809371	Formation of the cornified envelope	8	138	0.009136652542372881	2.2040911507037464E-7	8.375546372674236E-6	8	27	0.0019573727707699	9606	Homo sapiens	KRT2;KRT13;KRT10;KRT6A		R-HSA-6810357;R-HSA-6811539;R-HSA-6814387;R-HSA-8942224;R-HSA-6814734;R-HSA-6814764;R-HSA-6814298;R-HSA-6810937
R-HSA-69278	Cell Cycle, Mitotic	14	596	0.03945974576271186	3.641183616842625E-7	1.2348419163865643E-5	28	352	0.025518341307814992	9606	Homo sapiens	DHFR;TPX2;KIF2A;MCM7;MCM3;NCAPG;MCM4;MCM5;MCM6;NDC80;NCAPH;MCM2		R-HSA-2514854;R-HSA-375302;R-HSA-2467809;R-HSA-2467811;R-HSA-1638803;R-HSA-68940;R-HSA-8961863;R-HSA-2529015;R-HSA-68944;R-HSA-2520883;R-HSA-2529020;R-HSA-69019;R-HSA-8961874;R-HSA-2468287;R-HSA-8853405;R-HSA-68954;R-HSA-68960;R-HSA-9648114;R-HSA-176942;R-HSA-8853419;R-HSA-68914;R-HSA-2484822;R-HSA-68917;R-HSA-68916;R-HSA-68919;R-HSA-68918;R-HSA-1638821;R-HSA-169468
R-HSA-69206	G1/S Transition	8	150	0.00993114406779661	4.1161397212885475E-7	1.2348419163865643E-5	10	61	0.004422212556183848	9606	Homo sapiens	DHFR;MCM7;MCM3;MCM4;MCM5;MCM6;MCM2		R-HSA-68960;R-HSA-68914;R-HSA-68917;R-HSA-68916;R-HSA-68919;R-HSA-68918;R-HSA-8961874;R-HSA-68954;R-HSA-68940;R-HSA-8961863
R-HSA-1640170	Cell Cycle	15	734	0.04859639830508475	7.56183611394512E-7	2.0416957507651823E-5	39	451	0.03269537480063796	9606	Homo sapiens	MCM7;NCAPG;CHTF18;NDC80;NCAPH;DHFR;TPX2;KIF2A;MCM3;MCM4;MCM5;MCM6;MCM2		R-HSA-2514854;R-HSA-375302;R-HSA-2467809;R-HSA-2467811;R-HSA-1638803;R-HSA-68940;R-HSA-8961863;R-HSA-2529015;R-HSA-68944;R-HSA-2520883;R-HSA-2529020;R-HSA-69019;R-HSA-8961874;R-HSA-2468287;R-HSA-8853405;R-HSA-68954;R-HSA-68960;R-HSA-9648114;R-HSA-141409;R-HSA-174439;R-HSA-176298;R-HSA-176942;R-HSA-141422;R-HSA-8853419;R-HSA-174447;R-HSA-68914;R-HSA-2484822;R-HSA-68917;R-HSA-68916;R-HSA-141431;R-H…
R-HSA-68949	Orc1 removal from chromatin	6	73	0.004833156779661017	1.0792840524631586E-6	2.4823533206652648E-5	1	4	2.899811512251704E-4	9606	Homo sapiens	MCM7;MCM3;MCM4;MCM5;MCM6;MCM2		R-HSA-68944
R-HSA-453279	Mitotic G1 phase and G1/S transition	8	174	0.011520127118644068	1.2395774855455954E-6	2.6031127196457504E-5	10	101	0.007322024068435551	9606	Homo sapiens	DHFR;MCM7;MCM3;MCM4;MCM5;MCM6;MCM2		R-HSA-68960;R-HSA-68914;R-HSA-68917;R-HSA-68916;R-HSA-68919;R-HSA-68918;R-HSA-8961874;R-HSA-68954;R-HSA-68940;R-HSA-8961863
R-HSA-69052	Switching of origins to a post-replicative state	6	94	0.006223516949152542	4.570095008094022E-6	8.30314347717298E-5	2	10	7.249528780629259E-4	9606	Homo sapiens	MCM7;MCM3;MCM4;MCM5;MCM6;MCM2		R-HSA-68944;R-HSA-69019
R-HSA-69620	Cell Cycle Checkpoints	9	279	0.018471927966101694	4.6128574873183226E-6	8.30314347717298E-5	6	56	0.0040597361171523854	9606	Homo sapiens	KIF2A;MCM7;MCM3;MCM4;MCM5;MCM6;NDC80;MCM2		R-HSA-141409;R-HSA-141431;R-HSA-176298;R-HSA-176318;R-HSA-141422;R-HSA-141439
R-HSA-6805567	Keratinization	8	226	0.01496292372881356	8.352424733404362E-6	1.4199122046787416E-4	15	34	0.002464839785413948	9606	Homo sapiens	KRT2;KRT13;KRT10;KRT6A		R-HSA-6806629;R-HSA-6805573;R-HSA-6814734;R-HSA-6814764;R-HSA-6805546;R-HSA-6806613;R-HSA-6810357;R-HSA-6811539;R-HSA-6814387;R-HSA-6806610;R-HSA-6809393;R-HSA-6809663;R-HSA-8942224;R-HSA-6814298;R-HSA-6810937
R-HSA-68867	Assembly of the pre-replicative complex	6	114	0.007547669491525424	1.3554577911079058E-5	2.1687324657726492E-4	8	23	0.0016673916195447296	9606	Homo sapiens	MCM7;MCM3;MCM4;MCM5;MCM6;MCM2		R-HSA-9749253;R-HSA-9749350;R-HSA-9749286;R-HSA-9749351;R-HSA-9749320;R-HSA-9757256;R-HSA-9757257;R-HSA-9757258
R-HSA-69002	DNA Replication Pre-Initiation	6	132	0.008739406779661016	3.066630117076752E-5	3.9866191521997774E-4	16	32	0.002319849209801363	9606	Homo sapiens	MCM7;MCM3;MCM4;MCM5;MCM6;MCM2		R-HSA-68960;R-HSA-68940;R-HSA-9749253;R-HSA-9749350;R-HSA-9749286;R-HSA-9749351;R-HSA-68914;R-HSA-68917;R-HSA-68916;R-HSA-68919;R-HSA-68918;R-HSA-68954;R-HSA-9749320;R-HSA-9757256;R-HSA-9757257;R-HSA-9757258
R-HSA-69239	Synthesis of DNA	6	132	0.008739406779661016	3.066630117076752E-5	3.9866191521997774E-4	4	27	0.0019573727707699	9606	Homo sapiens	MCM7;MCM3;MCM4;MCM5;MCM6;MCM2		R-HSA-68944;R-HSA-69019;R-HSA-176942;R-HSA-169468
R-HSA-69481	G2/M Checkpoints	6	153	0.010129766949152543	6.908271540906341E-5	8.980753003178243E-4	2	24	0.0017398869073510222	9606	Homo sapiens	MCM7;MCM3;MCM4;MCM5;MCM6;MCM2		R-HSA-176298;R-HSA-176318
R-HSA-69306	DNA Replication	6	169	0.011189088983050847	1.1862439757759358E-4	0.001423492770931123	20	58	0.00420472669276497	9606	Homo sapiens	MCM7;MCM3;MCM4;MCM5;MCM6;MCM2		R-HSA-68960;R-HSA-176942;R-HSA-68940;R-HSA-9749253;R-HSA-68944;R-HSA-9749350;R-HSA-9749286;R-HSA-9749351;R-HSA-68914;R-HSA-68917;R-HSA-68916;R-HSA-68919;R-HSA-68918;R-HSA-69019;R-HSA-68954;R-HSA-9749320;R-HSA-9757256;R-HSA-9757257;R-HSA-169468;R-HSA-9757258
R-HSA-69242	S Phase	6	179	0.011851165254237288	1.61714116025502E-4	0.001940569392306024	4	55	0.003987240829346092	9606	Homo sapiens	MCM7;MCM3;MCM4;MCM5;MCM6;MCM2		R-HSA-68944;R-HSA-69019;R-HSA-176942;R-HSA-169468
R-HSA-5626467	RHO GTPases activate IQGAPs	3	36	0.0023834745762711866	6.043589784352488E-4	0.0066479487627877365	5	5	3.6247643903146296E-4	9606	Homo sapiens	IQGAP2;IQGAP3		R-HSA-5626549;R-HSA-5626469;R-HSA-5672304;R-HSA-5626507;R-HSA-5672329
R-HSA-2514853	Condensation of Prometaphase Chromosomes	2	15	9.93114406779661E-4	0.002150898282546998	0.023659881108016978	4	4	2.899811512251704E-4	9606	Homo sapiens	NCAPG;NCAPH		R-HSA-2514854;R-HSA-2529015;R-HSA-2520883;R-HSA-2529020
R-HSA-68877	Mitotic Prometaphase	5	211	0.013969809322033898	0.0026738220200481777	0.026738220200481777	10	20	0.0014499057561258518	9606	Homo sapiens	KIF2A;NCAPG;NDC80;NCAPH		R-HSA-2514854;R-HSA-2529015;R-HSA-9648114;R-HSA-2484822;R-HSA-375302;R-HSA-2520883;R-HSA-2529020;R-HSA-1638803;R-HSA-2468287;R-HSA-1638821
R-HSA-8847993	ERBB2 Activates PTK6 Signaling	2	18	0.0011917372881355933	0.003070483269108526	0.030701083426168063	2	2	1.449905756125852E-4	9606	Homo sapiens	EGFR		R-HSA-8848005;R-HSA-8847995
R-HSA-6785631	ERBB2 Regulates Cell Motility	2	19	0.0012579449152542372	0.0034112314917964515	0.030701083426168063	2	2	1.449905756125852E-4	9606	Homo sapiens	EGFR		R-HSA-6785636;R-HSA-6785648
R-HSA-195258	RHO GTPase Effectors	6	326	0.021583686440677968	0.003529349972522855	0.031764149752705695	8	113	0.008191967522111062	9606	Homo sapiens	KIF2A;IQGAP2;IQGAP3;NDC80		R-HSA-5626549;R-HSA-5626469;R-HSA-5666160;R-HSA-5672304;R-HSA-5666129;R-HSA-5626507;R-HSA-5666169;R-HSA-5672329
R-HSA-8866910	TFAP2 (AP-2) family regulates transcription of growth factors and their receptors	2	21	0.0013903601694915254	0.004143127760410037	0.03316137178310008	2	18	0.0013049151805132667	9606	Homo sapiens	EGFR		R-HSA-8874789;R-HSA-8874797
R-HSA-8848021	Signaling by PTK6	3	71	0.004700741525423728	0.00414517147288751	0.03316137178310008	11	53	0.0038422502537335075	9606	Homo sapiens	KHDRBS1;EGFR		R-HSA-8848005;R-HSA-8857555;R-HSA-8848993;R-HSA-8857583;R-HSA-8848975;R-HSA-8857565;R-HSA-8857549;R-HSA-8847995;R-HSA-8848939;R-HSA-9634702;R-HSA-8857577
R-HSA-9006927	Signaling by Non-Receptor Tyrosine Kinases	3	71	0.004700741525423728	0.00414517147288751	0.03316137178310008	11	53	0.0038422502537335075	9606	Homo sapiens	KHDRBS1;EGFR		R-HSA-8848005;R-HSA-8857555;R-HSA-8848993;R-HSA-8857583;R-HSA-8848975;R-HSA-8857565;R-HSA-8857549;R-HSA-8847995;R-HSA-8848939;R-HSA-9634702;R-HSA-8857577
R-HSA-1963642	PI3K events in ERBB2 signaling	2	22	0.0014565677966101695	0.004533969340905553	0.03627175472724442	5	7	5.074670146440482E-4	9606	Homo sapiens	EGFR		R-HSA-1306963;R-HSA-1306965;R-HSA-1250462;R-HSA-1306957;R-HSA-1250189
R-HSA-1980143	Signaling by NOTCH1	3	84	0.005561440677966102	0.006586022143411863	0.0526881771472949	10	39	0.002827316224445411	9606	Homo sapiens	HDAC4;DTX2		R-HSA-1980125;R-HSA-1980109;R-HSA-1912398;R-HSA-1980122;R-HSA-1980123;R-HSA-1980118;R-HSA-1912357;R-HSA-1912388;R-HSA-1980112;R-HSA-373706
R-HSA-350054	Notch-HLH transcription pathway	2	28	0.001853813559322034	0.007218030386177743	0.05774424308942194	1	2	1.449905756125852E-4	9606	Homo sapiens	HDAC4		R-HSA-350058
R-HSA-141444	Amplification of signal from unattached kinetochores via a MAD2 inhibitory signal	3	94	0.006223516949152542	0.008940574526898115	0.0625840216882868	4	4	2.899811512251704E-4	9606	Homo sapiens	KIF2A;NDC80		R-HSA-141409;R-HSA-141431;R-HSA-141422;R-HSA-141439
R-HSA-141424	Amplification of signal from the kinetochores	3	94	0.006223516949152542	0.008940574526898115	0.0625840216882868	4	4	2.899811512251704E-4	9606	Homo sapiens	KIF2A;NDC80		R-HSA-141409;R-HSA-141431;R-HSA-141422;R-HSA-141439
R-HSA-9664565	Signaling by ERBB2 KD Mutants	2	35	0.0023172669491525423	0.011052782930931704	0.06995858271938982	15	17	0.001232419892706974	9606	Homo sapiens	EGFR		R-HSA-9665009;R-HSA-9664976;R-HSA-9664567;R-HSA-9664983;R-HSA-9664950;R-HSA-9664918;R-HSA-9664664;R-HSA-9664991;R-HSA-9664646;R-HSA-9664933;R-HSA-9665034;R-HSA-9665032;R-HSA-9665000;R-HSA-9664588;R-HSA-9664940
R-HSA-1250196	SHC1 events in ERBB2 signaling	2	36	0.0023834745762711866	0.01165976378656497	0.06995858271938982	4	6	4.3497172683775554E-4	9606	Homo sapiens	EGFR		R-HSA-1250195;R-HSA-1250486;R-HSA-1963578;R-HSA-1250463
R-HSA-1227990	Signaling by ERBB2 in Cancer	2	36	0.0023834745762711866	0.01165976378656497	0.06995858271938982	38	62	0.0044947078439901405	9606	Homo sapiens	EGFR		R-HSA-9664976;R-HSA-9664983;R-HSA-9664918;R-HSA-9664664;R-HSA-9664991;R-HSA-9665411;R-HSA-9665410;R-HSA-9665409;R-HSA-9665408;R-HSA-9665415;R-HSA-9664646;R-HSA-9665413;R-HSA-9665034;R-HSA-9665417;R-HSA-9665416;R-HSA-9665032;R-HSA-9664588;R-HSA-9665009;R-HSA-9664567;R-HSA-9664950;R-HSA-9665407;R-HSA-9665406;R-HSA-9665404;R-HSA-9665699;R-HSA-9665698;R-HSA-9665697;R-HSA-9665701;R-HSA-9664933;R-HSA-9…
R-HSA-8863795	Downregulation of ERBB2 signaling	2	36	0.0023834745762711866	0.01165976378656497	0.06995858271938982	6	14	0.0010149340292880964	9606	Homo sapiens	EGFR		R-HSA-1963563;R-HSA-8864125;R-HSA-1358798;R-HSA-8863804;R-HSA-1358792;R-HSA-8864105
R-HSA-69618	Mitotic Spindle Checkpoint	3	111	0.007349046610169492	0.013949016576697892	0.08369409946018735	4	7	5.074670146440482E-4	9606	Homo sapiens	KIF2A;NDC80		R-HSA-141409;R-HSA-141431;R-HSA-141422;R-HSA-141439
R-HSA-69205	G1/S-Specific Transcription	2	43	0.0028469279661016947	0.016303377441748146	0.09782026465048888	2	28	0.0020298680585761927	9606	Homo sapiens	DHFR		R-HSA-8961874;R-HSA-8961863
R-HSA-9648025	EML4 and NUDC in mitotic spindle formation	3	121	0.008011122881355932	0.017506399143702223	0.10503839486221334	1	5	3.6247643903146296E-4	9606	Homo sapiens	KIF2A;NDC80		R-HSA-9648114
R-HSA-381676	Glucagon-like Peptide-1 (GLP1) regulates insulin secretion	2	50	0.0033103813559322032	0.02160512936744652	0.1296307762046791	4	11	7.974481658692185E-4	9606	Homo sapiens	GNB1;IQGAP3		R-HSA-422320;R-HSA-381612;R-HSA-381707;R-HSA-381706
R-HSA-2500257	Resolution of Sister Chromatid Cohesion	3	134	0.008871822033898306	0.022821298788135325	0.13319919387397017	4	8	5.799623024503408E-4	9606	Homo sapiens	KIF2A;NDC80		R-HSA-2484822;R-HSA-1638803;R-HSA-2468287;R-HSA-1638821
R-HSA-8864260	Transcriptional regulation by the AP-2 (TFAP2) family of transcription factors	2	52	0.0034427966101694915	0.023234577146525548	0.13319919387397017	2	44	0.003189792663476874	9606	Homo sapiens	EGFR		R-HSA-8874789;R-HSA-8874797
R-HSA-5663202	Diseases of signal transduction by growth factor receptors and second messengers	6	498	0.03297139830508475	0.024674987143956884	0.13319919387397017	107	478	0.034652747571407856	9606	Homo sapiens	HDAC4;GOLGA4;IQGAP3;EGFR		R-HSA-9656211;R-HSA-9656209;R-HSA-1218833;R-HSA-9656215;R-HSA-9664918;R-HSA-9656214;R-HSA-9664664;R-HSA-1226014;R-HSA-1226012;R-HSA-1220610;R-HSA-9665411;R-HSA-1248002;R-HSA-1220611;R-HSA-9665410;R-HSA-9665409;R-HSA-9665408;R-HSA-1220614;R-HSA-9665415;R-HSA-9664646;R-HSA-1220612;R-HSA-9665413;R-HSA-1220613;R-HSA-9665417;R-HSA-9665416;R-HSA-1169421;R-HSA-9664950;R-HSA-2400009;R-HSA-9665699;R-HSA-9…
R-HSA-450408	AUF1 (hnRNP D0) binds and destabilizes mRNA	2	56	0.003707627118644068	0.026639838774794034	0.13319919387397017	4	4	2.899811512251704E-4	9606	Homo sapiens	HNRNPD		R-HSA-450551;R-HSA-450580;R-HSA-450434;R-HSA-450466
R-HSA-1251932	PLCG1 events in ERBB2 signaling	1	6	3.9724576271186443E-4	0.026656355352781547	0.13328177676390773	2	2	1.449905756125852E-4	9606	Homo sapiens	EGFR		R-HSA-1251922;R-HSA-1251944
R-HSA-1306955	GRB7 events in ERBB2 signaling	1	6	3.9724576271186443E-4	0.026656355352781547	0.13328177676390773	1	1	7.24952878062926E-5	9606	Homo sapiens	EGFR		R-HSA-1306953
R-HSA-2122947	NOTCH1 Intracellular Domain Regulates Transcription	2	57	0.003773834745762712	0.0275209332852836	0.137604666426418	1	18	0.0013049151805132667	9606	Homo sapiens	HDAC4		R-HSA-1912388
R-HSA-157118	Signaling by NOTCH	4	259	0.017147775423728813	0.02959544982561102	0.1409761186665004	12	154	0.011164274322169059	9606	Homo sapiens	HDAC4;DTX2;EGFR		R-HSA-1980125;R-HSA-1980109;R-HSA-1912398;R-HSA-9018573;R-HSA-1980122;R-HSA-9018572;R-HSA-1980123;R-HSA-1980118;R-HSA-1912357;R-HSA-1912388;R-HSA-1980112;R-HSA-373706
R-HSA-5663220	RHO GTPases Activate Formins	3	149	0.009864936440677966	0.02992852959622161	0.1409761186665004	3	27	0.0019573727707699	9606	Homo sapiens	KIF2A;NDC80		R-HSA-5666160;R-HSA-5666129;R-HSA-5666169
R-HSA-9673768	Signaling by membrane-tethered fusions of PDGFRA or PDGFRB	1	7	4.634533898305085E-4	0.031030492498419604	0.1409761186665004	2	2	1.449905756125852E-4	9606	Homo sapiens	GOLGA4		R-HSA-9673761;R-HSA-9673760
R-HSA-8849468	PTK6 Regulates Proteins Involved in RNA Processing	1	7	4.634533898305085E-4	0.031030492498419604	0.1409761186665004	3	7	5.074670146440482E-4	9606	Homo sapiens	KHDRBS1		R-HSA-8848993;R-HSA-8848975;R-HSA-8848939
R-HSA-8941284	RUNX2 regulates chondrocyte maturation	1	7	4.634533898305085E-4	0.031030492498419604	0.1409761186665004	1	4	2.899811512251704E-4	9606	Homo sapiens	HDAC4		R-HSA-9008326
R-HSA-9013406	RHOQ GTPase cycle	2	63	0.004171080508474576	0.033048427419340776	0.1409761186665004	1	5	3.6247643903146296E-4	9606	Homo sapiens	IQGAP3		R-HSA-9018746
R-HSA-9013148	CDC42 GTPase cycle	3	159	0.010527012711864406	0.0352440296666251	0.1409761186665004	1	6	4.3497172683775554E-4	9606	Homo sapiens	IQGAP2;IQGAP3		R-HSA-9013157
R-HSA-5638303	Inhibition of Signaling by Overexpressed EGFR	1	8	5.296610169491525E-4	0.03538526037655332	0.14154104150621327	2	2	1.449905756125852E-4	9606	Homo sapiens	EGFR		R-HSA-1248677;R-HSA-1225978
R-HSA-5638302	Signaling by Overexpressed Wild-Type EGFR in Cancer	1	8	5.296610169491525E-4	0.03538526037655332	0.14154104150621327	2	2	1.449905756125852E-4	9606	Homo sapiens	EGFR		R-HSA-1248677;R-HSA-1225978
R-HSA-1227986	Signaling by ERBB2	2	68	0.004502118644067797	0.037957357778659384	0.14895991818969312	28	46	0.003334783239089459	9606	Homo sapiens	EGFR		R-HSA-1250195;R-HSA-1306963;R-HSA-1251922;R-HSA-8848005;R-HSA-6785636;R-HSA-1306965;R-HSA-1250463;R-HSA-1250462;R-HSA-1250498;R-HSA-6785648;R-HSA-1963589;R-HSA-1358798;R-HSA-1306953;R-HSA-1358792;R-HSA-1306957;R-HSA-1250189;R-HSA-1963586;R-HSA-1963581;R-HSA-1963582;R-HSA-1250486;R-HSA-1963578;R-HSA-1250488;R-HSA-8864105;R-HSA-1963563;R-HSA-8864125;R-HSA-8863804;R-HSA-1251944;R-HSA-8847995
R-HSA-983189	Kinesins	2	68	0.004502118644067797	0.037957357778659384	0.14895991818969312	3	14	0.0010149340292880964	9606	Homo sapiens	KIF2A		R-HSA-983259;R-HSA-990489;R-HSA-983266
R-HSA-2644602	Signaling by NOTCH1 PEST Domain Mutants in Cancer	2	68	0.004502118644067797	0.037957357778659384	0.14895991818969312	1	21	0.0015224010439321444	9606	Homo sapiens	HDAC4		R-HSA-2220982
R-HSA-2894858	Signaling by NOTCH1 HD+PEST Domain Mutants in Cancer	2	68	0.004502118644067797	0.037957357778659384	0.14895991818969312	1	21	0.0015224010439321444	9606	Homo sapiens	HDAC4		R-HSA-2220982
R-HSA-2894862	Constitutive Signaling by NOTCH1 HD+PEST Domain Mutants	2	68	0.004502118644067797	0.037957357778659384	0.14895991818969312	1	21	0.0015224010439321444	9606	Homo sapiens	HDAC4		R-HSA-2220982
R-HSA-2644606	Constitutive Signaling by NOTCH1 PEST Domain Mutants	2	68	0.004502118644067797	0.037957357778659384	0.14895991818969312	1	21	0.0015224010439321444	9606	Homo sapiens	HDAC4		R-HSA-2220982
R-HSA-2644603	Signaling by NOTCH1 in Cancer	2	68	0.004502118644067797	0.037957357778659384	0.14895991818969312	1	39	0.002827316224445411	9606	Homo sapiens	HDAC4		R-HSA-2220982
R-HSA-68886	M Phase	5	416	0.02754237288135593	0.03957822863261262	0.14895991818969312	12	91	0.006597071190372626	9606	Homo sapiens	KIF2A;NCAPG;NDC80;NCAPH		R-HSA-2514854;R-HSA-9648114;R-HSA-2529015;R-HSA-375302;R-HSA-2484822;R-HSA-2467809;R-HSA-2520883;R-HSA-2467811;R-HSA-1638803;R-HSA-2529020;R-HSA-2468287;R-HSA-1638821
R-HSA-8857538	PTK6 promotes HIF1A stabilization	1	9	5.958686440677966E-4	0.03972074348235266	0.14895991818969312	6	6	4.3497172683775554E-4	9606	Homo sapiens	EGFR		R-HSA-8857555;R-HSA-8857583;R-HSA-8857565;R-HSA-8857549;R-HSA-9634702;R-HSA-8857577
R-HSA-194315	Signaling by Rho GTPases	7	709	0.04694120762711865	0.04009835525603189	0.14895991818969312	20	203	0.014716543424677396	9606	Homo sapiens	KIF2A;STMN2;IQGAP2;IQGAP3;NDC80		R-HSA-5626549;R-HSA-9018794;R-HSA-5666160;R-HSA-5672304;R-HSA-5666129;R-HSA-9018766;R-HSA-9013024;R-HSA-9017507;R-HSA-9013157;R-HSA-5666169;R-HSA-9013145;R-HSA-5626469;R-HSA-9018746;R-HSA-9013009;R-HSA-9014449;R-HSA-9696271;R-HSA-5626507;R-HSA-9013110;R-HSA-9014294;R-HSA-5672329
R-HSA-9716542	Signaling by Rho GTPases, Miro GTPases and RHOBTB3	7	725	0.04800052966101695	0.04433292785872878	0.14895991818969312	20	212	0.01536900101493403	9606	Homo sapiens	KIF2A;STMN2;IQGAP2;IQGAP3;NDC80		R-HSA-5626549;R-HSA-9018794;R-HSA-5666160;R-HSA-5672304;R-HSA-5666129;R-HSA-9018766;R-HSA-9013024;R-HSA-9017507;R-HSA-9013157;R-HSA-5666169;R-HSA-9013145;R-HSA-5626469;R-HSA-9018746;R-HSA-9013009;R-HSA-9014449;R-HSA-9696271;R-HSA-5626507;R-HSA-9013110;R-HSA-9014294;R-HSA-5672329
R-HSA-212718	EGFR interacts with phospholipase C-gamma	1	11	7.282838983050848E-4	0.048334191543959015	0.14895991818969312	3	3	2.1748586341887777E-4	9606	Homo sapiens	EGFR		R-HSA-212706;R-HSA-212710;R-HSA-212713
R-HSA-9013106	RHOC GTPase cycle	2	79	0.005230402542372881	0.04965330606323104	0.14895991818969312	1	6	4.3497172683775554E-4	9606	Homo sapiens	IQGAP3		R-HSA-9013110
R-HSA-9013149	RAC1 GTPase cycle	3	191	0.012645656779661016	0.05527854048486536	0.16122241567885687	1	6	4.3497172683775554E-4	9606	Homo sapiens	IQGAP2;IQGAP3		R-HSA-9013145
R-HSA-140342	Apoptosis induced DNA fragmentation	1	13	8.606991525423729E-4	0.05687150541144581	0.16122241567885687	10	12	8.699434536755111E-4	9606	Homo sapiens	CAD		R-HSA-211186;R-HSA-211239;R-HSA-211207;R-HSA-211191;R-HSA-211190;R-HSA-211206;R-HSA-211193;R-HSA-9029667;R-HSA-211224;R-HSA-211247
R-HSA-2179392	EGFR Transactivation by Gastrin	1	13	8.606991525423729E-4	0.05687150541144581	0.16122241567885687	3	6	4.3497172683775554E-4	9606	Homo sapiens	EGFR		R-HSA-2179415;R-HSA-2179387;R-HSA-2179407
R-HSA-2022923	Dermatan sulfate biosynthesis	1	13	8.606991525423729E-4	0.05687150541144581	0.16122241567885687	1	4	2.899811512251704E-4	9606	Homo sapiens	PIP		R-HSA-2022061
R-HSA-2467813	Separation of Sister Chromatids	3	195	0.012910487288135594	0.05809661647876685	0.16122241567885687	2	8	5.799623024503408E-4	9606	Homo sapiens	KIF2A;NDC80		R-HSA-2467809;R-HSA-2467811
R-HSA-418359	Reduction of cytosolic Ca++ levels	1	15	9.93114406779661E-4	0.06533334807780233	0.16122241567885687	1	3	2.1748586341887777E-4	9606	Homo sapiens	ATP2B1		R-HSA-418309
R-HSA-450531	Regulation of mRNA stability by proteins that bind AU-rich elements	2	93	0.006157309322033898	0.06613717733224722	0.16122241567885687	4	26	0.0018848774829636073	9606	Homo sapiens	HNRNPD		R-HSA-450551;R-HSA-450580;R-HSA-450434;R-HSA-450466
R-HSA-179812	GRB2 events in EGFR signaling	1	16	0.001059322033898305	0.06953617333959061	0.16122241567885687	2	3	2.1748586341887777E-4	9606	Homo sapiens	EGFR		R-HSA-177938;R-HSA-177943
R-HSA-1358803	Downregulation of ERBB2:ERBB3 signaling	1	16	0.001059322033898305	0.06953617333959061	0.16122241567885687	2	8	5.799623024503408E-4	9606	Homo sapiens	EGFR		R-HSA-1358798;R-HSA-1358792
R-HSA-8951936	RUNX3 regulates p14-ARF	1	16	0.001059322033898305	0.06953617333959061	0.16122241567885687	2	8	5.799623024503408E-4	9606	Homo sapiens	HDAC4		R-HSA-8952062;R-HSA-8952069
R-HSA-2219530	Constitutive Signaling by Aberrant PI3K in Cancer	2	96	0.006355932203389831	0.06987863771883818	0.16122241567885687	1	2	1.449905756125852E-4	9606	Homo sapiens	EGFR		R-HSA-2400009
R-HSA-397014	Muscle contraction	3	213	0.014102224576271187	0.07159785712564037	0.16122241567885687	9	42	0.003044802087864289	9606	Homo sapiens	DES;CAD;ATP2B1		R-HSA-390597;R-HSA-445700;R-HSA-390598;R-HSA-418309;R-HSA-390593;R-HSA-445699;R-HSA-390595;R-HSA-445704;R-HSA-445705
R-HSA-6811442	Intra-Golgi and retrograde Golgi-to-ER traffic	3	219	0.01449947033898305	0.07638694565951776	0.16122241567885687	5	48	0.0034797738147020443	9606	Homo sapiens	GOLGA4;KIF2A		R-HSA-6811431;R-HSA-6811426;R-HSA-6811423;R-HSA-6814091;R-HSA-6814682
R-HSA-180336	SHC1 events in EGFR signaling	1	19	0.0012579449152542372	0.08203324339340112	0.16122241567885687	4	4	2.899811512251704E-4	9606	Homo sapiens	EGFR		R-HSA-177936;R-HSA-177925;R-HSA-177945;R-HSA-177933
R-HSA-8964315	G beta:gamma signalling through BTK	1	19	0.0012579449152542372	0.08203324339340112	0.16122241567885687	3	3	2.1748586341887777E-4	9606	Homo sapiens	GNB1		R-HSA-8964317;R-HSA-8964271;R-HSA-8964241
R-HSA-110312	Translesion synthesis by REV1	1	19	0.0012579449152542372	0.08203324339340112	0.16122241567885687	3	5	3.6247643903146296E-4	9606	Homo sapiens	MAD2L2		R-HSA-5652151;R-HSA-110322;R-HSA-110311
R-HSA-422356	Regulation of insulin secretion	2	106	0.007018008474576272	0.08282902330491182	0.16122241567885687	8	34	0.002464839785413948	9606	Homo sapiens	GNB1;IQGAP3		R-HSA-400037;R-HSA-422320;R-HSA-400097;R-HSA-400046;R-HSA-381612;R-HSA-400092;R-HSA-381707;R-HSA-381706
R-HSA-6811434	COPI-dependent Golgi-to-ER retrograde traffic	2	107	0.0070842161016949155	0.08416230894056298	0.16122241567885687	2	11	7.974481658692185E-4	9606	Homo sapiens	KIF2A		R-HSA-6811426;R-HSA-6811423
R-HSA-5656121	Translesion synthesis by POLI	1	20	0.0013241525423728813	0.08616206794618797	0.16122241567885687	3	3	2.1748586341887777E-4	9606	Homo sapiens	MAD2L2		R-HSA-5656148;R-HSA-5656158;R-HSA-5656105
R-HSA-2485179	Activation of the phototransduction cascade	1	20	0.0013241525423728813	0.08616206794618797	0.16122241567885687	2	8	5.799623024503408E-4	9606	Homo sapiens	GNB1		R-HSA-2485180;R-HSA-2485182
R-HSA-9009391	Extra-nuclear estrogen signaling	2	111	0.007349046610169492	0.08956070742484723	0.16122241567885687	6	39	0.002827316224445411	9606	Homo sapiens	GNB1;EGFR		R-HSA-9021596;R-HSA-9625482;R-HSA-9021601;R-HSA-9021600;R-HSA-9625465;R-HSA-9625487
R-HSA-430039	mRNA decay by 5' to 3' exoribonuclease	1	21	0.0013903601694915254	0.09027259378658492	0.16122241567885687	3	3	2.1748586341887777E-4	9606	Homo sapiens	LSM5		R-HSA-429860;R-HSA-429845;R-HSA-429978
R-HSA-5655862	Translesion synthesis by POLK	1	21	0.0013903601694915254	0.09027259378658492	0.16122241567885687	3	3	2.1748586341887777E-4	9606	Homo sapiens	MAD2L2		R-HSA-5655892;R-HSA-5655965;R-HSA-5655835
R-HSA-8964616	G beta:gamma signalling through CDC42	1	21	0.0013903601694915254	0.09027259378658492	0.16122241567885687	5	6	4.3497172683775554E-4	9606	Homo sapiens	GNB1		R-HSA-8964634;R-HSA-8964604;R-HSA-8964605;R-HSA-8964614;R-HSA-8964599
R-HSA-1963640	GRB2 events in ERBB2 signaling	1	21	0.0013903601694915254	0.09027259378658492	0.16122241567885687	2	4	2.899811512251704E-4	9606	Homo sapiens	EGFR		R-HSA-1250498;R-HSA-1250488
R-HSA-5637812	Signaling by EGFRvIII in Cancer	1	22	0.0014565677966101695	0.0943649008082732	0.16122241567885687	17	18	0.0013049151805132667	9606	Homo sapiens	EGFR		R-HSA-5637808;R-HSA-1247999;R-HSA-5638137;R-HSA-5637798;R-HSA-5637766;R-HSA-1248002;R-HSA-5637764;R-HSA-5637796;R-HSA-5637765;R-HSA-5637794;R-HSA-5637795;R-HSA-5637792;R-HSA-5637806;R-HSA-1248655;R-HSA-5637770;R-HSA-5637800;R-HSA-5637801
R-HSA-5637810	Constitutive Signaling by EGFRvIII	1	22	0.0014565677966101695	0.0943649008082732	0.16122241567885687	17	18	0.0013049151805132667	9606	Homo sapiens	EGFR		R-HSA-5637808;R-HSA-1247999;R-HSA-5638137;R-HSA-5637798;R-HSA-5637766;R-HSA-1248002;R-HSA-5637764;R-HSA-5637796;R-HSA-5637765;R-HSA-5637794;R-HSA-5637795;R-HSA-5637792;R-HSA-5637806;R-HSA-1248655;R-HSA-5637770;R-HSA-5637800;R-HSA-5637801
R-HSA-418217	G beta:gamma signalling through PLC beta	1	23	0.0015227754237288136	0.0984390685613944	0.16122241567885687	2	2	1.449905756125852E-4	9606	Homo sapiens	GNB1		R-HSA-398193;R-HSA-398040
R-HSA-9665348	Signaling by ERBB2 ECD mutants	1	23	0.0015227754237288136	0.0984390685613944	0.16122241567885687	13	15	0.001087429317094389	9606	Homo sapiens	EGFR		R-HSA-9665407;R-HSA-9665406;R-HSA-9665404;R-HSA-9665411;R-HSA-9665410;R-HSA-9665409;R-HSA-9665408;R-HSA-9665415;R-HSA-9665413;R-HSA-9665417;R-HSA-9665416;R-HSA-9665389;R-HSA-9665388
R-HSA-180292	GAB1 signalosome	1	23	0.0015227754237288136	0.0984390685613944	0.16122241567885687	9	11	7.974481658692185E-4	9606	Homo sapiens	EGFR		R-HSA-177923;R-HSA-177939;R-HSA-177926;R-HSA-177927;R-HSA-177924;R-HSA-177941;R-HSA-177930;R-HSA-177944;R-HSA-177935
R-HSA-500657	Presynaptic function of Kainate receptors	1	23	0.0015227754237288136	0.0984390685613944	0.16122241567885687	1	2	1.449905756125852E-4	9606	Homo sapiens	GNB1		R-HSA-500717
R-HSA-418346	Platelet homeostasis	2	118	0.0078125	0.09924645634405116	0.16122241567885687	4	30	0.002174858634188778	9606	Homo sapiens	GNB1;ATP2B1		R-HSA-392852;R-HSA-418309;R-HSA-392870;R-HSA-392874
R-HSA-68882	Mitotic Anaphase	3	249	0.016485699152542374	0.10234628800120249	0.16122241567885687	2	32	0.002319849209801363	9606	Homo sapiens	KIF2A;NDC80		R-HSA-2467809;R-HSA-2467811
R-HSA-392851	Prostacyclin signalling through prostacyclin receptor	1	24	0.0015889830508474577	0.10249517625397808	0.16122241567885687	3	4	2.899811512251704E-4	9606	Homo sapiens	GNB1		R-HSA-392852;R-HSA-392870;R-HSA-392874
R-HSA-500753	Pyrimidine biosynthesis	1	24	0.0015889830508474577	0.10249517625397808	0.16122241567885687	3	6	4.3497172683775554E-4	9606	Homo sapiens	CAD		R-HSA-73571;R-HSA-73573;R-HSA-73577
R-HSA-881907	Gastrin-CREB signalling pathway via PKC and MAPK	1	24	0.0015889830508474577	0.10249517625397808	0.16122241567885687	3	9	6.524575902566333E-4	9606	Homo sapiens	EGFR		R-HSA-2179415;R-HSA-2179387;R-HSA-2179407
R-HSA-2555396	Mitotic Metaphase and Anaphase	3	250	0.016551906779661018	0.10326622153934495	0.16122241567885687	2	33	0.0023923444976076554	9606	Homo sapiens	KIF2A;NDC80		R-HSA-2467809;R-HSA-2467811
R-HSA-445144	Signal transduction by L1	1	25	0.0016551906779661016	0.106533302753404	0.16122241567885687	1	11	7.974481658692185E-4	9606	Homo sapiens	EGFR		R-HSA-445069
R-HSA-373753	Nephrin family interactions	1	25	0.0016551906779661016	0.106533302753404	0.16122241567885687	1	13	9.424387414818037E-4	9606	Homo sapiens	IQGAP3		R-HSA-451377
R-HSA-2219528	PI3K/AKT Signaling in Cancer	2	124	0.008209745762711865	0.10777255526409824	0.16122241567885687	1	21	0.0015224010439321444	9606	Homo sapiens	EGFR		R-HSA-2400009
R-HSA-1236382	Constitutive Signaling by Ligand-Responsive EGFR Cancer Variants	1	26	0.0017213983050847457	0.11055352658781759	0.16122241567885687	22	23	0.0016673916195447296	9606	Homo sapiens	EGFR		R-HSA-1218833;R-HSA-1225947;R-HSA-1226014;R-HSA-1225950;R-HSA-1225951;R-HSA-1226012;R-HSA-1225949;R-HSA-1220610;R-HSA-1220611;R-HSA-1247842;R-HSA-1247841;R-HSA-1226016;R-HSA-1225952;R-HSA-1220614;R-HSA-1220612;R-HSA-1225956;R-HSA-1220613;R-HSA-1247844;R-HSA-1225957;R-HSA-1225960;R-HSA-1225961;R-HSA-1169421
R-HSA-5637815	Signaling by Ligand-Responsive EGFR Variants in Cancer	1	26	0.0017213983050847457	0.11055352658781759	0.16122241567885687	22	23	0.0016673916195447296	9606	Homo sapiens	EGFR		R-HSA-1218833;R-HSA-1225947;R-HSA-1226014;R-HSA-1225950;R-HSA-1225951;R-HSA-1226012;R-HSA-1225949;R-HSA-1220610;R-HSA-1220611;R-HSA-1247842;R-HSA-1247841;R-HSA-1226016;R-HSA-1225952;R-HSA-1220614;R-HSA-1220612;R-HSA-1225956;R-HSA-1220613;R-HSA-1247844;R-HSA-1225957;R-HSA-1225960;R-HSA-1225961;R-HSA-1169421
R-HSA-202040	G-protein activation	1	26	0.0017213983050847457	0.11055352658781759	0.16122241567885687	5	6	4.3497172683775554E-4	9606	Homo sapiens	GNB1		R-HSA-167408;R-HSA-167429;R-HSA-167419;R-HSA-167433;R-HSA-112271
R-HSA-392170	ADP signalling through P2Y purinoceptor 12	1	26	0.0017213983050847457	0.11055352658781759	0.16122241567885687	3	4	2.899811512251704E-4	9606	Homo sapiens	GNB1		R-HSA-392195;R-HSA-392187;R-HSA-392202
R-HSA-70221	Glycogen breakdown (glycogenolysis)	1	26	0.0017213983050847457	0.11055352658781759	0.16122241567885687	3	15	0.001087429317094389	9606	Homo sapiens	PYGL		R-HSA-71588;R-HSA-71590;R-HSA-453339
R-HSA-1266738	Developmental Biology	9	1263	0.08362023305084745	0.11270271788920694	0.16122241567885687	16	556	0.04030738002029868	9606	Homo sapiens	KRT2;KRT13;KRT10;EGFR;KRT6A		R-HSA-6806629;R-HSA-6805573;R-HSA-6814734;R-HSA-445069;R-HSA-6814764;R-HSA-6805546;R-HSA-6806613;R-HSA-6810357;R-HSA-6811539;R-HSA-6814387;R-HSA-6806610;R-HSA-6809393;R-HSA-6809663;R-HSA-8942224;R-HSA-6814298;R-HSA-6810937
R-HSA-9671555	Signaling by PDGFR in disease	1	27	0.0017876059322033898	0.11455592594760722	0.16122241567885687	2	24	0.0017398869073510222	9606	Homo sapiens	GOLGA4		R-HSA-9673761;R-HSA-9673760
R-HSA-6811558	PI5P, PP2A and IER3 Regulate PI3K/AKT Signaling	2	129	0.008540783898305085	0.11502296600566653	0.16122241567885687	2	7	5.074670146440482E-4	9606	Homo sapiens	EGFR		R-HSA-2316434;R-HSA-8857925
R-HSA-9013507	NOTCH3 Activation and Transmission of Signal to the Nucleus	1	28	0.001853813559322034	0.1185405786868079	0.16122241567885687	2	15	0.001087429317094389	9606	Homo sapiens	EGFR		R-HSA-9018573;R-HSA-9018572
R-HSA-392451	G beta:gamma signalling through PI3Kgamma	1	29	0.001920021186440678	0.12250756232453253	0.16122241567885687	2	4	2.899811512251704E-4	9606	Homo sapiens	GNB1		R-HSA-392295;R-HSA-392300
R-HSA-9634638	Estrogen-dependent nuclear events downstream of ESR-membrane signaling	1	29	0.001920021186440678	0.12250756232453253	0.16122241567885687	1	12	8.699434536755111E-4	9606	Homo sapiens	EGFR		R-HSA-9625465
R-HSA-9665686	Signaling by ERBB2 TMD/JMD mutants	1	30	0.001986228813559322	0.12645695404639756	0.16122241567885687	10	13	9.424387414818037E-4	9606	Homo sapiens	EGFR		R-HSA-9665699;R-HSA-9665698;R-HSA-9665697;R-HSA-9665701;R-HSA-9665700;R-HSA-9665707;R-HSA-9665706;R-HSA-9665705;R-HSA-9665704;R-HSA-9665709
R-HSA-428930	Thromboxane signalling through TP receptor	1	30	0.001986228813559322	0.12645695404639756	0.16122241567885687	6	8	5.799623024503408E-4	9606	Homo sapiens	GNB1		R-HSA-428918;R-HSA-428917;R-HSA-428752;R-HSA-428750;R-HSA-428909;R-HSA-428749
R-HSA-418592	ADP signalling through P2Y purinoceptor 1	1	30	0.001986228813559322	0.12645695404639756	0.16122241567885687	3	7	5.074670146440482E-4	9606	Homo sapiens	GNB1		R-HSA-418581;R-HSA-418579;R-HSA-418576
R-HSA-199418	Negative regulation of the PI3K/AKT network	2	137	0.009070444915254237	0.1268743693855412	0.16122241567885687	2	10	7.249528780629259E-4	9606	Homo sapiens	EGFR		R-HSA-2316434;R-HSA-8857925
R-HSA-1296041	Activation of G protein gated Potassium channels	1	31	0.0020524364406779663	0.13038883070590868	0.16122241567885687	3	3	2.1748586341887777E-4	9606	Homo sapiens	GNB1		R-HSA-1013020;R-HSA-1013013;R-HSA-1013012
R-HSA-997272	Inhibition of voltage gated Ca2+ channels via Gbeta/gamma subunits	1	31	0.0020524364406779663	0.13038883070590868	0.16122241567885687	3	3	2.1748586341887777E-4	9606	Homo sapiens	GNB1		R-HSA-1013020;R-HSA-1013013;R-HSA-1013012
R-HSA-1296059	G protein gated Potassium channels	1	31	0.0020524364406779663	0.13038883070590868	0.16122241567885687	3	3	2.1748586341887777E-4	9606	Homo sapiens	GNB1		R-HSA-1013020;R-HSA-1013013;R-HSA-1013012
R-HSA-174411	Polymerase switching on the C-strand of the telomere	1	31	0.0020524364406779663	0.13038883070590868	0.16122241567885687	5	6	4.3497172683775554E-4	9606	Homo sapiens	CHTF18		R-HSA-174439;R-HSA-9668902;R-HSA-174452;R-HSA-9668904;R-HSA-174447
R-HSA-1643713	Signaling by EGFR in Cancer	1	32	0.00211864406779661	0.13430326882590848	0.16122241567885687	41	42	0.003044802087864289	9606	Homo sapiens	EGFR		R-HSA-1218833;R-HSA-1225947;R-HSA-1226014;R-HSA-1225950;R-HSA-1225951;R-HSA-1226012;R-HSA-1225949;R-HSA-1220610;R-HSA-5637766;R-HSA-1248002;R-HSA-1220611;R-HSA-5637764;R-HSA-5637765;R-HSA-1220614;R-HSA-1220612;R-HSA-1220613;R-HSA-1248655;R-HSA-1169421;R-HSA-5637770;R-HSA-5637808;R-HSA-1225978;R-HSA-1247999;R-HSA-5638137;R-HSA-5637798;R-HSA-1247842;R-HSA-1247841;R-HSA-1226016;R-HSA-1225952;R-HSA-5…
R-HSA-400042	Adrenaline,noradrenaline inhibits insulin secretion	1	32	0.00211864406779661	0.13430326882590848	0.16122241567885687	4	6	4.3497172683775554E-4	9606	Homo sapiens	GNB1		R-HSA-400037;R-HSA-400097;R-HSA-400046;R-HSA-400092
R-HSA-2122948	Activated NOTCH1 Transmits Signal to the Nucleus	1	32	0.00211864406779661	0.13430326882590848	0.16122241567885687	9	21	0.0015224010439321444	9606	Homo sapiens	DTX2		R-HSA-1980125;R-HSA-1980109;R-HSA-1912398;R-HSA-1980122;R-HSA-1980123;R-HSA-1980118;R-HSA-1912357;R-HSA-1980112;R-HSA-373706
R-HSA-163685	Integration of energy metabolism	2	145	0.00960010593220339	0.13900325000849134	0.16122241567885687	9	62	0.0044947078439901405	9606	Homo sapiens	GNB1;IQGAP3		R-HSA-825631;R-HSA-400037;R-HSA-422320;R-HSA-400097;R-HSA-400046;R-HSA-381612;R-HSA-400092;R-HSA-381707;R-HSA-381706
R-HSA-451326	Activation of kainate receptors upon glutamate binding	1	34	0.0022510593220338984	0.14208013389369967	0.16122241567885687	1	6	4.3497172683775554E-4	9606	Homo sapiens	GNB1		R-HSA-500717
R-HSA-8856688	Golgi-to-ER retrograde transport	2	148	0.009798728813559322	0.14361617331443344	0.16122241567885687	2	18	0.0013049151805132667	9606	Homo sapiens	KIF2A		R-HSA-6811426;R-HSA-6811423
R-HSA-2132295	MHC class II antigen presentation	2	149	0.009864936440677966	0.14516113196636304	0.16122241567885687	1	26	0.0018848774829636073	9606	Homo sapiens	KIF2A		R-HSA-2213248
R-HSA-418360	Platelet calcium homeostasis	1	35	0.0023172669491525423	0.14594271224633149	0.16122241567885687	1	8	5.799623024503408E-4	9606	Homo sapiens	ATP2B1		R-HSA-418309
R-HSA-420092	Glucagon-type ligand receptors	1	35	0.0023172669491525423	0.14594271224633149	0.16122241567885687	1	8	5.799623024503408E-4	9606	Homo sapiens	GNB1		R-HSA-381612
R-HSA-456926	Thrombin signalling through proteinase activated receptors (PARs)	1	36	0.0023834745762711866	0.14978815487188668	0.16122241567885687	6	15	0.001087429317094389	9606	Homo sapiens	GNB1		R-HSA-396996;R-HSA-397891;R-HSA-114552;R-HSA-396941;R-HSA-397835;R-HSA-114558
R-HSA-5223345	Miscellaneous transport and binding events	1	36	0.0023834745762711866	0.14978815487188668	0.16122241567885687	1	13	9.424387414818037E-4	9606	Homo sapiens	PIP		R-HSA-5252072
R-HSA-109582	Hemostasis	6	803	0.05316472457627119	0.1526520914426771	0.16122241567885687	26	334	0.024213426127301724	9606	Homo sapiens	KIF2A;PSG4;GNB1;PSG1;ATP2B1		R-HSA-396996;R-HSA-418309;R-HSA-397891;R-HSA-392195;R-HSA-428750;R-HSA-8870732;R-HSA-428749;R-HSA-396941;R-HSA-397835;R-HSA-392202;R-HSA-392852;R-HSA-418581;R-HSA-983259;R-HSA-418579;R-HSA-990489;R-HSA-428752;R-HSA-418576;R-HSA-392870;R-HSA-428909;R-HSA-983266;R-HSA-392874;R-HSA-428918;R-HSA-428917;R-HSA-114552;R-HSA-392187;R-HSA-114558
R-HSA-8980692	RHOA GTPase cycle	2	154	0.010195974576271187	0.15293801863662426	0.16122241567885687	1	6	4.3497172683775554E-4	9606	Homo sapiens	IQGAP3		R-HSA-9013009
R-HSA-9012999	RHO GTPase cycle	4	460	0.03045550847457627	0.15318758080246697	0.16122241567885687	12	91	0.006597071190372626	9606	Homo sapiens	STMN2;IQGAP2;IQGAP3		R-HSA-9013145;R-HSA-9018794;R-HSA-9018746;R-HSA-9018766;R-HSA-9013009;R-HSA-9014449;R-HSA-9013024;R-HSA-9017507;R-HSA-9013157;R-HSA-9696271;R-HSA-9013110;R-HSA-9014294
R-HSA-182971	EGFR downregulation	1	37	0.0024496822033898305	0.1536165366606892	0.16122241567885687	19	22	0.001594896331738437	9606	Homo sapiens	EGFR		R-HSA-8867047;R-HSA-183072;R-HSA-8867044;R-HSA-8867041;R-HSA-182986;R-HSA-183051;R-HSA-8951490;R-HSA-182990;R-HSA-183055;R-HSA-183084;R-HSA-183058;R-HSA-182994;R-HSA-183089;R-HSA-182993;R-HSA-183002;R-HSA-183067;R-HSA-8864029;R-HSA-182969;R-HSA-183036
R-HSA-1474151	Tetrahydrobiopterin (BH4) synthesis, recycling, salvage and regulation	1	37	0.0024496822033898305	0.1536165366606892	0.16122241567885687	1	16	0.0011599246049006815	9606	Homo sapiens	DHFR		R-HSA-1497794
R-HSA-1296065	Inwardly rectifying K+ channels	1	38	0.0025158898305084744	0.15742793218069218	0.16122241567885687	3	7	5.074670146440482E-4	9606	Homo sapiens	GNB1		R-HSA-1013020;R-HSA-1013013;R-HSA-1013012
R-HSA-397795	G-protein beta:gamma signalling	1	39	0.0025820974576271187	0.16122241567885687	0.16122241567885687	12	15	0.001087429317094389	9606	Homo sapiens	GNB1		R-HSA-392295;R-HSA-8964634;R-HSA-8964604;R-HSA-8964605;R-HSA-8964317;R-HSA-8964271;R-HSA-398193;R-HSA-392300;R-HSA-8964241;R-HSA-8964614;R-HSA-398040;R-HSA-8964599
R-HSA-9013424	RHOV GTPase cycle	1	39	0.0025820974576271187	0.16122241567885687	0.16122241567885687	1	2	1.449905756125852E-4	9606	Homo sapiens	IQGAP3		R-HSA-9018794
R-HSA-390522	Striated Muscle Contraction	1	40	0.0026483050847457626	0.16500006108248866	0.16500006108248866	4	4	2.899811512251704E-4	9606	Homo sapiens	DES		R-HSA-390597;R-HSA-390598;R-HSA-390593;R-HSA-390595
R-HSA-163359	Glucagon signaling in metabolic regulation	1	40	0.0026483050847457626	0.16500006108248866	0.16500006108248866	1	6	4.3497172683775554E-4	9606	Homo sapiens	GNB1		R-HSA-825631
R-HSA-4090294	SUMOylation of intracellular receptors	1	40	0.0026483050847457626	0.16500006108248866	0.16500006108248866	2	25	0.0018123821951573148	9606	Homo sapiens	HDAC4		R-HSA-4720446;R-HSA-4720432
R-HSA-6814122	Cooperation of PDCL (PhLP1) and TRiC/CCT in G-protein beta folding	1	41	0.002714512711864407	0.1687609420006292	0.1687609420006292	7	11	7.974481658692185E-4	9606	Homo sapiens	GNB1		R-HSA-6814119;R-HSA-6814418;R-HSA-8850560;R-HSA-8850527;R-HSA-6814124;R-HSA-6814121;R-HSA-6814120
R-HSA-392518	Signal amplification	1	41	0.002714512711864407	0.1687609420006292	0.1687609420006292	12	19	0.0013774104683195593	9606	Homo sapiens	GNB1		R-HSA-428918;R-HSA-428917;R-HSA-418581;R-HSA-418579;R-HSA-392195;R-HSA-428752;R-HSA-418576;R-HSA-428750;R-HSA-428909;R-HSA-428749;R-HSA-392187;R-HSA-392202
R-HSA-6798695	Neutrophil degranulation	4	480	0.03177966101694915	0.17037152733450056	0.17037152733450056	3	10	7.249528780629259E-4	9606	Homo sapiens	PYGL;IQGAP2;IQGAP3;KRT6A		R-HSA-6798743;R-HSA-6800434;R-HSA-6798748
R-HSA-9696273	RND1 GTPase cycle	1	43	0.0028469279661016947	0.1762327032332568	0.1762327032332568	1	2	1.449905756125852E-4	9606	Homo sapiens	STMN2		R-HSA-9696271
R-HSA-8982491	Glycogen metabolism	1	43	0.0028469279661016947	0.1762327032332568	0.1762327032332568	3	39	0.002827316224445411	9606	Homo sapiens	PYGL		R-HSA-71588;R-HSA-71590;R-HSA-453339
R-HSA-8941326	RUNX2 regulates bone development	1	43	0.0028469279661016947	0.1762327032332568	0.1762327032332568	1	32	0.002319849209801363	9606	Homo sapiens	HDAC4		R-HSA-9008326
R-HSA-5673001	RAF/MAP kinase cascade	3	322	0.02131885593220339	0.1771499826126096	0.1771499826126096	9	75	0.005437146585471945	9606	Homo sapiens	IQGAP3;EGFR		R-HSA-9657603;R-HSA-5672980;R-HSA-5672965;R-HSA-5672978;R-HSA-9657606;R-HSA-5672972;R-HSA-9657608;R-HSA-5672973;R-HSA-9657599
R-HSA-6802948	Signaling by high-kinase activity BRAF mutants	1	44	0.002913135593220339	0.1799437291865249	0.1799437291865249	4	6	4.3497172683775554E-4	9606	Homo sapiens	IQGAP3		R-HSA-6802912;R-HSA-6802911;R-HSA-6802910;R-HSA-6803227
R-HSA-9013420	RHOU GTPase cycle	1	44	0.002913135593220339	0.1799437291865249	0.1799437291865249	1	4	2.899811512251704E-4	9606	Homo sapiens	IQGAP3		R-HSA-9018766
R-HSA-381771	Synthesis, secretion, and inactivation of Glucagon-like Peptide-1 (GLP-1)	1	44	0.002913135593220339	0.1799437291865249	0.1799437291865249	1	7	5.074670146440482E-4	9606	Homo sapiens	GNB1		R-HSA-383313
R-HSA-5684996	MAPK1/MAPK3 signaling	3	329	0.0217823093220339	0.18500237666309494	0.18500237666309494	9	82	0.005944613600115992	9606	Homo sapiens	IQGAP3;EGFR		R-HSA-9657603;R-HSA-5672980;R-HSA-5672965;R-HSA-5672978;R-HSA-9657606;R-HSA-5672972;R-HSA-9657608;R-HSA-5672973;R-HSA-9657599
R-HSA-196757	Metabolism of folate and pterines	1	47	0.003111758474576271	0.19097825565541937	0.19097825565541937	1	30	0.002174858634188778	9606	Homo sapiens	DHFR		R-HSA-9709098
R-HSA-110313	Translesion synthesis by Y family DNA polymerases bypasses lesions on DNA template	1	48	0.0031779661016949155	0.19462381977434506	0.19462381977434506	9	28	0.0020298680585761927	9606	Homo sapiens	MAD2L2		R-HSA-5652151;R-HSA-5655892;R-HSA-5656148;R-HSA-110322;R-HSA-110311;R-HSA-5656158;R-HSA-5655965;R-HSA-5655835;R-HSA-5656105
R-HSA-400508	Incretin synthesis, secretion, and inactivation	1	48	0.0031779661016949155	0.19462381977434506	0.19462381977434506	1	14	0.0010149340292880964	9606	Homo sapiens	GNB1		R-HSA-383313
R-HSA-5674135	MAP2K and MAPK activation	1	49	0.0032441737288135594	0.19825319698263377	0.19825319698263377	8	12	8.699434536755111E-4	9606	Homo sapiens	IQGAP3		R-HSA-9657603;R-HSA-5672980;R-HSA-5672978;R-HSA-9657606;R-HSA-5672972;R-HSA-9657608;R-HSA-5672973;R-HSA-9657599
R-HSA-9656223	Signaling by RAF1 mutants	1	49	0.0032441737288135594	0.19825319698263377	0.19825319698263377	4	7	5.074670146440482E-4	9606	Homo sapiens	IQGAP3		R-HSA-9656211;R-HSA-9656209;R-HSA-9656215;R-HSA-9656214
R-HSA-445355	Smooth Muscle Contraction	1	49	0.0032441737288135594	0.19825319698263377	0.19825319698263377	4	11	7.974481658692185E-4	9606	Homo sapiens	CAD		R-HSA-445700;R-HSA-445699;R-HSA-445704;R-HSA-445705
R-HSA-174417	Telomere C-strand (Lagging Strand) Synthesis	1	49	0.0032441737288135594	0.19825319698263377	0.19825319698263377	5	18	0.0013049151805132667	9606	Homo sapiens	CHTF18		R-HSA-174439;R-HSA-9668902;R-HSA-174452;R-HSA-9668904;R-HSA-174447
R-HSA-991365	Activation of GABAB receptors	1	50	0.0033103813559322032	0.20186645808483472	0.20186645808483472	3	8	5.799623024503408E-4	9606	Homo sapiens	GNB1		R-HSA-1013020;R-HSA-1013013;R-HSA-1013012
R-HSA-977444	GABA B receptor activation	1	50	0.0033103813559322032	0.20186645808483472	0.20186645808483472	3	9	6.524575902566333E-4	9606	Homo sapiens	GNB1		R-HSA-1013020;R-HSA-1013013;R-HSA-1013012
R-HSA-72163	mRNA Splicing - Major Pathway	2	187	0.01238082627118644	0.20597639045161287	0.20597639045161287	8	9	6.524575902566333E-4	9606	Homo sapiens	HNRNPD;LSM5		R-HSA-72160;R-HSA-72130;R-HSA-156661;R-HSA-72139;R-HSA-72107;R-HSA-72124;R-HSA-72127;R-HSA-72143
R-HSA-156581	Methylation	1	52	0.0034427966101694915	0.20904491366523892	0.20904491366523892	2	13	9.424387414818037E-4	9606	Homo sapiens	AS3MT		R-HSA-5696213;R-HSA-5696220
R-HSA-909733	Interferon alpha/beta signaling	2	190	0.012579449152542372	0.21090646255547685	0.21090646255547685	2	24	0.0017398869073510222	9606	Homo sapiens	IRF6		R-HSA-1015702;R-HSA-1015699
R-HSA-432040	Vasopressin regulates renal water homeostasis via Aquaporins	1	53	0.003509004237288136	0.21261024823250563	0.21261024823250563	3	15	0.001087429317094389	9606	Homo sapiens	GNB1		R-HSA-432195;R-HSA-422320;R-HSA-432188
R-HSA-6802955	Paradoxical activation of RAF signaling by kinase inactive BRAF	1	54	0.0035752118644067797	0.21615974687436512	0.21615974687436512	4	7	5.074670146440482E-4	9606	Homo sapiens	IQGAP3		R-HSA-6802918;R-HSA-6803234;R-HSA-6802943;R-HSA-6802942
R-HSA-6802946	Signaling by moderate kinase activity BRAF mutants	1	54	0.0035752118644067797	0.21615974687436512	0.21615974687436512	4	7	5.074670146440482E-4	9606	Homo sapiens	IQGAP3		R-HSA-6802919;R-HSA-6802914;R-HSA-6803230;R-HSA-6802921
R-HSA-9649948	Signaling downstream of RAS mutants	1	54	0.0035752118644067797	0.21615974687436512	0.21615974687436512	4	7	5.074670146440482E-4	9606	Homo sapiens	IQGAP3		R-HSA-6803233;R-HSA-6802926;R-HSA-6802925;R-HSA-6802922
R-HSA-6802949	Signaling by RAS mutants	1	54	0.0035752118644067797	0.21615974687436512	0.21615974687436512	4	9	6.524575902566333E-4	9606	Homo sapiens	IQGAP3		R-HSA-6803233;R-HSA-6802926;R-HSA-6802925;R-HSA-6802922
R-HSA-75153	Apoptotic execution phase	1	54	0.0035752118644067797	0.21615974687436512	0.21615974687436512	10	57	0.004132231404958678	9606	Homo sapiens	CAD		R-HSA-211186;R-HSA-211239;R-HSA-211207;R-HSA-211191;R-HSA-211190;R-HSA-211206;R-HSA-211193;R-HSA-9029667;R-HSA-211224;R-HSA-211247
R-HSA-2514859	Inactivation, recovery and regulation of the phototransduction cascade	1	54	0.0035752118644067797	0.21615974687436512	0.21615974687436512	1	19	0.0013774104683195593	9606	Homo sapiens	GNB1		R-HSA-74882
R-HSA-983231	Factors involved in megakaryocyte development and platelet production	2	194	0.01284427966101695	0.21749898793459965	0.21749898793459965	3	43	0.0031172973756705812	9606	Homo sapiens	KIF2A		R-HSA-983259;R-HSA-990489;R-HSA-983266
R-HSA-6811440	Retrograde transport at the Trans-Golgi-Network	1	55	0.0036414194915254236	0.21969347888305368	0.21969347888305368	3	20	0.0014499057561258518	9606	Homo sapiens	GOLGA4		R-HSA-6811431;R-HSA-6814091;R-HSA-6814682
R-HSA-9634597	GPER1 signaling	1	56	0.003707627118644068	0.22321151325217814	0.22321151325217814	4	10	7.249528780629259E-4	9606	Homo sapiens	GNB1		R-HSA-9036301;R-HSA-9036307;R-HSA-9624014;R-HSA-9036308
R-HSA-72172	mRNA Splicing	2	198	0.013109110169491525	0.22411074980605417	0.22411074980605417	8	14	0.0010149340292880964	9606	Homo sapiens	HNRNPD;LSM5		R-HSA-72160;R-HSA-72130;R-HSA-156661;R-HSA-72139;R-HSA-72107;R-HSA-72124;R-HSA-72127;R-HSA-72143
R-HSA-73893	DNA Damage Bypass	1	57	0.003773834745762712	0.22671391867799506	0.22671391867799506	9	34	0.002464839785413948	9606	Homo sapiens	MAD2L2		R-HSA-5652151;R-HSA-5655892;R-HSA-5656148;R-HSA-110322;R-HSA-110311;R-HSA-5656158;R-HSA-5655965;R-HSA-5655835;R-HSA-5656105
R-HSA-9013409	RHOJ GTPase cycle	1	59	0.00390625	0.23367211600546556	0.23367211600546556	1	3	2.1748586341887777E-4	9606	Homo sapiens	IQGAP3		R-HSA-9017507
R-HSA-2514856	The phototransduction cascade	1	59	0.00390625	0.23367211600546556	0.23367211600546556	3	27	0.0019573727707699	9606	Homo sapiens	GNB1		R-HSA-74882;R-HSA-2485180;R-HSA-2485182
R-HSA-177929	Signaling by EGFR	1	61	0.004038665254237288	0.2405686145361754	0.2405686145361754	42	49	0.003552269102508337	9606	Homo sapiens	EGFR		R-HSA-177922;R-HSA-177923;R-HSA-177926;R-HSA-177927;R-HSA-177924;R-HSA-177925;R-HSA-177930;R-HSA-182986;R-HSA-183051;R-HSA-8951490;R-HSA-177934;R-HSA-182990;R-HSA-177935;R-HSA-183055;R-HSA-177933;R-HSA-177938;R-HSA-183058;R-HSA-182994;R-HSA-177939;R-HSA-177936;R-HSA-177937;R-HSA-182993;R-HSA-177942;R-HSA-177943;R-HSA-177941;R-HSA-183002;R-HSA-183067;R-HSA-8864029;R-HSA-177944;R-HSA-177945;R-HSA-8…
R-HSA-8956320	Nucleotide biosynthesis	1	61	0.004038665254237288	0.2405686145361754	0.2405686145361754	3	23	0.0016673916195447296	9606	Homo sapiens	CAD		R-HSA-73571;R-HSA-73573;R-HSA-73577
R-HSA-4551638	SUMOylation of chromatin organization proteins	1	62	0.0041048728813559325	0.24399389536976135	0.24399389536976135	2	15	0.001087429317094389	9606	Homo sapiens	HDAC4		R-HSA-4615987;R-HSA-4615872
R-HSA-5683057	MAPK family signaling cascades	3	380	0.025158898305084745	0.24463430655633478	0.24463430655633478	9	122	0.008844425112367696	9606	Homo sapiens	IQGAP3;EGFR		R-HSA-9657603;R-HSA-5672980;R-HSA-5672965;R-HSA-5672978;R-HSA-9657606;R-HSA-5672972;R-HSA-9657608;R-HSA-5672973;R-HSA-9657599
R-HSA-418597	G alpha (z) signalling events	1	63	0.004171080508474576	0.24740395326335385	0.24740395326335385	4	13	9.424387414818037E-4	9606	Homo sapiens	GNB1		R-HSA-749453;R-HSA-750988;R-HSA-751024;R-HSA-749446
R-HSA-9012852	Signaling by NOTCH3	1	63	0.004171080508474576	0.24740395326335385	0.24740395326335385	2	37	0.0026823256488328257	9606	Homo sapiens	EGFR		R-HSA-9018573;R-HSA-9018572
R-HSA-5578775	Ion homeostasis	1	64	0.00423728813559322	0.2507988548667569	0.2507988548667569	1	16	0.0011599246049006815	9606	Homo sapiens	ATP2B1		R-HSA-418309
R-HSA-429914	Deadenylation-dependent mRNA decay	1	65	0.004303495762711864	0.25417866654236154	0.25417866654236154	3	10	7.249528780629259E-4	9606	Homo sapiens	LSM5		R-HSA-429860;R-HSA-429845;R-HSA-429978
R-HSA-180786	Extension of Telomeres	1	67	0.004435911016949153	0.2608932841300282	0.2608932841300282	5	28	0.0020298680585761927	9606	Homo sapiens	CHTF18		R-HSA-174439;R-HSA-9668902;R-HSA-174452;R-HSA-9668904;R-HSA-174447
R-HSA-977443	GABA receptor activation	1	68	0.004502118644067797	0.2642282213407896	0.2642282213407896	3	12	8.699434536755111E-4	9606	Homo sapiens	GNB1		R-HSA-1013020;R-HSA-1013013;R-HSA-1013012
R-HSA-8978934	Metabolism of cofactors	1	68	0.004502118644067797	0.2642282213407896	0.2642282213407896	1	28	0.0020298680585761927	9606	Homo sapiens	DHFR		R-HSA-1497794
R-HSA-445717	Aquaporin-mediated transport	1	69	0.004568326271186441	0.267548331223578	0.267548331223578	3	25	0.0018123821951573148	9606	Homo sapiens	GNB1		R-HSA-432195;R-HSA-422320;R-HSA-432188
R-HSA-936837	Ion transport by P-type ATPases	1	71	0.004700741525423728	0.27414432849932024	0.27414432849932024	1	16	0.0011599246049006815	9606	Homo sapiens	ATP2B1		R-HSA-418309
R-HSA-6802952	Signaling by BRAF and RAF1 fusions	1	73	0.004833156779661017	0.28068179215092737	0.28068179215092737	4	5	3.6247643903146296E-4	9606	Homo sapiens	IQGAP3		R-HSA-6802935;R-HSA-6802934;R-HSA-6802933;R-HSA-6802932
R-HSA-1793185	Chondroitin sulfate/dermatan sulfate metabolism	1	73	0.004833156779661017	0.28068179215092737	0.28068179215092737	1	28	0.0020298680585761927	9606	Homo sapiens	PIP		R-HSA-2022061
R-HSA-8854518	AURKA Activation by TPX2	1	74	0.004899364406779661	0.28392873396185225	0.28392873396185225	2	2	1.449905756125852E-4	9606	Homo sapiens	TPX2		R-HSA-8853405;R-HSA-8853419
R-HSA-9013026	RHOB GTPase cycle	1	75	0.004965572033898305	0.28716123392748216	0.28716123392748216	1	6	4.3497172683775554E-4	9606	Homo sapiens	IQGAP3		R-HSA-9013024
R-HSA-9662360	Sensory processing of sound by inner hair cells of the cochlea	1	76	0.005031779661016949	0.2903793553281526	0.2903793553281526	1	7	5.074670146440482E-4	9606	Homo sapiens	ATP2B1		R-HSA-9664214
R-HSA-1650814	Collagen biosynthesis and modifying enzymes	1	76	0.005031779661016949	0.2903793553281526	0.2903793553281526	4	51	0.0036972596781209223	9606	Homo sapiens	P3H1		R-HSA-1980233;R-HSA-2022073;R-HSA-8948226;R-HSA-8948230
R-HSA-9013408	RHOG GTPase cycle	1	78	0.005164194915254237	0.29677271419170337	0.29677271419170337	1	6	4.3497172683775554E-4	9606	Homo sapiens	IQGAP2		R-HSA-9014449
R-HSA-4086398	Ca2+ pathway	1	81	0.005362817796610169	0.30625647961754343	0.30625647961754343	5	27	0.0019573727707699	9606	Homo sapiens	GNB1		R-HSA-398193;R-HSA-3965444;R-HSA-3965447;R-HSA-3965441;R-HSA-398040
R-HSA-1236394	Signaling by ERBB4	1	82	0.005429025423728814	0.30938964330342356	0.30938964330342356	1	52	0.0037697549659272147	9606	Homo sapiens	EGFR		R-HSA-1977959
R-HSA-877300	Interferon gamma signaling	2	250	0.016551906779661018	0.31068353100472934	0.31068353100472934	2	16	0.0011599246049006815	9606	Homo sapiens	IRF6		R-HSA-1031716;R-HSA-1031713
R-HSA-416482	G alpha (12/13) signalling events	1	86	0.005693855932203389	0.3217834761611619	0.3217834761611619	4	15	0.001087429317094389	9606	Homo sapiens	GNB1		R-HSA-751019;R-HSA-751039;R-HSA-751027;R-HSA-751029
R-HSA-8939211	ESR-mediated signaling	2	257	0.017015360169491525	0.32227937775630866	0.32227937775630866	6	112	0.008119472234304771	9606	Homo sapiens	GNB1;EGFR		R-HSA-9021596;R-HSA-9625482;R-HSA-9021601;R-HSA-9021600;R-HSA-9625465;R-HSA-9625487
R-HSA-202733	Cell surface interactions at the vascular wall	2	257	0.017015360169491525	0.32227937775630866	0.32227937775630866	1	65	0.0047121937074090185	9606	Homo sapiens	PSG4;PSG1		R-HSA-8870732
R-HSA-72203	Processing of Capped Intron-Containing Pre-mRNA	2	258	0.01708156779661017	0.323932464701678	0.323932464701678	9	32	0.002319849209801363	9606	Homo sapiens	HNRNPD;LSM5		R-HSA-72160;R-HSA-72130;R-HSA-72103;R-HSA-156661;R-HSA-72139;R-HSA-72107;R-HSA-72124;R-HSA-72127;R-HSA-72143
R-HSA-9659379	Sensory processing of sound	1	87	0.005760063559322034	0.3248475325686676	0.3248475325686676	1	13	9.424387414818037E-4	9606	Homo sapiens	ATP2B1		R-HSA-9664214
R-HSA-9013404	RAC2 GTPase cycle	1	92	0.0060911016949152545	0.339964404516483	0.339964404516483	1	10	7.249528780629259E-4	9606	Homo sapiens	IQGAP3		R-HSA-9014294
R-HSA-6802957	Oncogenic MAPK signaling	1	93	0.006157309322033898	0.3429475120194201	0.3429475120194201	24	46	0.003334783239089459	9606	Homo sapiens	IQGAP3		R-HSA-6802919;R-HSA-9656211;R-HSA-6802918;R-HSA-9656209;R-HSA-9656215;R-HSA-6802914;R-HSA-6803234;R-HSA-9656214;R-HSA-6803233;R-HSA-6802912;R-HSA-6802926;R-HSA-6802925;R-HSA-6802922;R-HSA-6802921;R-HSA-6802935;R-HSA-6802934;R-HSA-6802933;R-HSA-6802932;R-HSA-6802943;R-HSA-6802911;R-HSA-6802942;R-HSA-6802910;R-HSA-6803230;R-HSA-6803227
R-HSA-6804756	Regulation of TP53 Activity through Phosphorylation	1	95	0.006289724576271186	0.3488739299747977	0.3488739299747977	1	26	0.0018848774829636073	9606	Homo sapiens	TPX2		R-HSA-6805103
R-HSA-390466	Chaperonin-mediated protein folding	1	96	0.006355932203389831	0.35181735674611403	0.35181735674611403	7	19	0.0013774104683195593	9606	Homo sapiens	GNB1		R-HSA-6814119;R-HSA-6814418;R-HSA-8850560;R-HSA-8850527;R-HSA-6814124;R-HSA-6814121;R-HSA-6814120
R-HSA-199991	Membrane Trafficking	4	668	0.04422669491525424	0.35442932878929967	0.35442932878929967	21	219	0.015876468029578077	9606	Homo sapiens	GOLGA4;KIF2A;EGFR		R-HSA-8868071;R-HSA-8866279;R-HSA-6811431;R-HSA-8868230;R-HSA-6811426;R-HSA-8867756;R-HSA-8868236;R-HSA-8868651;R-HSA-6814091;R-HSA-8867754;R-HSA-8868072;R-HSA-8868648;R-HSA-8868661;R-HSA-8868660;R-HSA-8868659;R-HSA-8868658;R-HSA-6811423;R-HSA-8869438;R-HSA-8871194;R-HSA-6814682;R-HSA-8871193
R-HSA-373080	Class B/2 (Secretin family receptors)	1	99	0.006554555084745763	0.36056920088137023	0.36056920088137023	1	20	0.0014499057561258518	9606	Homo sapiens	GNB1		R-HSA-381612
R-HSA-416476	G alpha (q) signalling events	2	284	0.018802966101694914	0.3665141068531317	0.3665141068531317	7	35	0.0025373350732202406	9606	Homo sapiens	GNB1;EGFR		R-HSA-749448;R-HSA-2179415;R-HSA-749452;R-HSA-2179387;R-HSA-750993;R-HSA-379048;R-HSA-2179407
R-HSA-391251	Protein folding	1	102	0.006753177966101695	0.36920459113137716	0.36920459113137716	7	28	0.0020298680585761927	9606	Homo sapiens	GNB1		R-HSA-6814119;R-HSA-6814418;R-HSA-8850560;R-HSA-8850527;R-HSA-6814124;R-HSA-6814121;R-HSA-6814120
R-HSA-1474290	Collagen formation	1	104	0.006885593220338983	0.3748975761195408	0.3748975761195408	4	77	0.005582137161084529	9606	Homo sapiens	P3H1		R-HSA-1980233;R-HSA-2022073;R-HSA-8948226;R-HSA-8948230
R-HSA-1296071	Potassium Channels	1	107	0.0070842161016949155	0.3833422595600796	0.3833422595600796	3	19	0.0013774104683195593	9606	Homo sapiens	GNB1		R-HSA-1013020;R-HSA-1013013;R-HSA-1013012
R-HSA-157579	Telomere Maintenance	1	109	0.007216631355932203	0.38890949804966113	0.38890949804966113	5	34	0.002464839785413948	9606	Homo sapiens	CHTF18		R-HSA-174439;R-HSA-9668902;R-HSA-174452;R-HSA-9668904;R-HSA-174447
R-HSA-111885	Opioid Signalling	1	113	0.00748146186440678	0.39989582231435705	0.39989582231435705	5	59	0.0042772219805712625	9606	Homo sapiens	GNB1		R-HSA-167408;R-HSA-167429;R-HSA-167419;R-HSA-167433;R-HSA-112271
R-HSA-8856825	Cargo recognition for clathrin-mediated endocytosis	1	115	0.0076138771186440675	0.4053157725723575	0.4053157725723575	1	15	0.001087429317094389	9606	Homo sapiens	EGFR		R-HSA-8866279
R-HSA-8878159	Transcriptional regulation by RUNX3	1	118	0.0078125	0.41335538438817687	0.41335538438817687	2	47	0.003407278526895752	9606	Homo sapiens	HDAC4		R-HSA-8952062;R-HSA-8952069
R-HSA-1257604	PIP3 activates AKT signaling	2	321	0.021252648305084745	0.42528860110049327	0.42528860110049327	2	86	0.0062345947513411624	9606	Homo sapiens	EGFR		R-HSA-2316434;R-HSA-8857925
R-HSA-2980736	Peptide hormone metabolism	1	127	0.008408368644067797	0.43683715678295865	0.43683715678295865	1	63	0.004567203131796433	9606	Homo sapiens	GNB1		R-HSA-383313
R-HSA-373760	L1CAM interactions	1	130	0.008606991525423728	0.44445668627299917	0.44445668627299917	1	54	0.0039147455415398	9606	Homo sapiens	EGFR		R-HSA-445069
R-HSA-1500931	Cell-Cell communication	1	134	0.008871822033898306	0.4544582525751635	0.4544582525751635	1	60	0.004349717268377556	9606	Homo sapiens	IQGAP3		R-HSA-451377
R-HSA-73886	Chromosome Maintenance	1	136	0.009004237288135594	0.4593922932555027	0.4593922932555027	5	38	0.0027548209366391185	9606	Homo sapiens	CHTF18		R-HSA-174439;R-HSA-9668902;R-HSA-174452;R-HSA-9668904;R-HSA-174447
R-HSA-9717207	Sensory perception of sweet, bitter, and umami (glutamate) taste	1	137	0.009070444915254237	0.46184279893725577	0.46184279893725577	11	21	0.0015224010439321444	9606	Homo sapiens	GNB1		R-HSA-9717205;R-HSA-9717206;R-HSA-9728752;R-HSA-9717202;R-HSA-9728723;R-HSA-9728748;R-HSA-9717182;R-HSA-9728697;R-HSA-9728729;R-HSA-9717193;R-HSA-9728747
R-HSA-5576891	Cardiac conduction	1	138	0.009136652542372881	0.4642823594103057	0.4642823594103057	1	27	0.0019573727707699	9606	Homo sapiens	ATP2B1		R-HSA-418309
R-HSA-8953854	Metabolism of RNA	4	788	0.052171610169491525	0.47675506723882677	0.47675506723882677	16	187	0.013556618819776715	9606	Homo sapiens	HNRNPD;LSM5		R-HSA-72160;R-HSA-429860;R-HSA-72130;R-HSA-450434;R-HSA-450466;R-HSA-72103;R-HSA-72139;R-HSA-72107;R-HSA-72143;R-HSA-450551;R-HSA-450580;R-HSA-429845;R-HSA-156661;R-HSA-429978;R-HSA-72124;R-HSA-72127
R-HSA-9717189	Sensory perception of taste	1	147	0.009732521186440678	0.4857537472828436	0.4857537472828436	11	25	0.0018123821951573148	9606	Homo sapiens	GNB1		R-HSA-9717205;R-HSA-9717206;R-HSA-9728752;R-HSA-9717202;R-HSA-9728723;R-HSA-9728748;R-HSA-9717182;R-HSA-9728697;R-HSA-9728729;R-HSA-9717193;R-HSA-9728747
R-HSA-8878166	Transcriptional regulation by RUNX2	1	147	0.009732521186440678	0.4857537472828436	0.4857537472828436	1	84	0.006089604175728578	9606	Homo sapiens	HDAC4		R-HSA-9008326
R-HSA-162582	Signal Transduction	14	3013	0.1994835805084746	0.49558861828824285	0.49558861828824285	180	2465	0.17870088444251123	9606	Homo sapiens	HDAC4;KHDRBS1;KIF2A;GNB1;STMN2;DTX2;IQGAP2;IQGAP3;NDC80;EGFR		R-HSA-177922;R-HSA-177923;R-HSA-8848005;R-HSA-6785636;R-HSA-177926;R-HSA-177927;R-HSA-177924;R-HSA-177925;R-HSA-5666129;R-HSA-9018766;R-HSA-167429;R-HSA-177930;R-HSA-183051;R-HSA-167433;R-HSA-177934;R-HSA-177935;R-HSA-183055;R-HSA-177933;R-HSA-177938;R-HSA-183058;R-HSA-9013145;R-HSA-177939;R-HSA-177936;R-HSA-177937;R-HSA-177942;R-HSA-177943;R-HSA-420883;R-HSA-9021596;R-HSA-177941;R-HSA-6785648;R-…
R-HSA-9006925	Intracellular signaling by second messengers	2	368	0.024364406779661018	0.49577310829492993	0.49577310829492993	2	114	0.008264462809917356	9606	Homo sapiens	EGFR		R-HSA-2316434;R-HSA-8857925
R-HSA-9660821	ADORA2B mediated anti-inflammatory cytokines production	1	159	0.010527012711864406	0.5130682596971513	0.5130682596971513	3	12	8.699434536755111E-4	9606	Homo sapiens	GNB1		R-HSA-9660819;R-HSA-9660824;R-HSA-9660828
R-HSA-5653656	Vesicle-mediated transport	4	828	0.05481991525423729	0.5158873048117886	0.5158873048117886	21	252	0.01826881252718573	9606	Homo sapiens	GOLGA4;KIF2A;EGFR		R-HSA-8868071;R-HSA-8866279;R-HSA-6811431;R-HSA-8868230;R-HSA-6811426;R-HSA-8867756;R-HSA-8868236;R-HSA-8868651;R-HSA-6814091;R-HSA-8867754;R-HSA-8868072;R-HSA-8868648;R-HSA-8868661;R-HSA-8868660;R-HSA-8868659;R-HSA-8868658;R-HSA-6811423;R-HSA-8869438;R-HSA-8871194;R-HSA-6814682;R-HSA-8871193
R-HSA-8856828	Clathrin-mediated endocytosis	1	161	0.010659427966101694	0.5174795481195594	0.5174795481195594	16	35	0.0025373350732202406	9606	Homo sapiens	EGFR		R-HSA-8868071;R-HSA-8866279;R-HSA-8868230;R-HSA-8867756;R-HSA-8868236;R-HSA-8868651;R-HSA-8867754;R-HSA-8868072;R-HSA-8868648;R-HSA-8868661;R-HSA-8868660;R-HSA-8868659;R-HSA-8868658;R-HSA-8869438;R-HSA-8871194;R-HSA-8871193
R-HSA-9006931	Signaling by Nuclear Receptors	2	387	0.025622351694915255	0.5227221725704259	0.5227221725704259	6	193	0.01399159054661447	9606	Homo sapiens	GNB1;EGFR		R-HSA-9021596;R-HSA-9625482;R-HSA-9021601;R-HSA-9021600;R-HSA-9625465;R-HSA-9625487
R-HSA-3858494	Beta-catenin independent WNT signaling	1	166	0.010990466101694915	0.5283362342015037	0.5283362342015037	5	51	0.0036972596781209223	9606	Homo sapiens	GNB1		R-HSA-398193;R-HSA-3965444;R-HSA-3965447;R-HSA-3965441;R-HSA-398040
R-HSA-913531	Interferon Signaling	2	395	0.026152012711864406	0.5337851980431594	0.5337851980431594	4	71	0.005147165434246774	9606	Homo sapiens	IRF6		R-HSA-1015702;R-HSA-1031716;R-HSA-1015699;R-HSA-1031713
R-HSA-2187338	Visual phototransduction	1	169	0.011189088983050847	0.5347343405962766	0.5347343405962766	3	92	0.006669566478178918	9606	Homo sapiens	GNB1		R-HSA-74882;R-HSA-2485180;R-HSA-2485182
R-HSA-5633007	Regulation of TP53 Activity	1	178	0.011784957627118644	0.5534199659734074	0.5534199659734074	1	98	0.007104538205016674	9606	Homo sapiens	TPX2		R-HSA-6805103
R-HSA-1630316	Glycosaminoglycan metabolism	1	182	0.012049788135593221	0.5614854665054296	0.5614854665054296	1	88	0.006379585326953748	9606	Homo sapiens	PIP		R-HSA-2022061
R-HSA-3108232	SUMO E3 ligases SUMOylate target proteins	1	183	0.012115995762711865	0.5634793106965079	0.5634793106965079	4	131	0.00949688270262433	9606	Homo sapiens	HDAC4		R-HSA-4615987;R-HSA-4615872;R-HSA-4720446;R-HSA-4720432
R-HSA-418555	G alpha (s) signalling events	1	187	0.01238082627118644	0.5713657516869938	0.5713657516869938	8	26	0.0018848774829636073	9606	Homo sapiens	GNB1		R-HSA-379044;R-HSA-9036301;R-HSA-9036307;R-HSA-9624014;R-HSA-744887;R-HSA-9036308;R-HSA-744886;R-HSA-751013
R-HSA-109581	Apoptosis	1	192	0.012711864406779662	0.5810266225037921	0.5810266225037921	10	141	0.010221835580687256	9606	Homo sapiens	CAD		R-HSA-211186;R-HSA-211239;R-HSA-211207;R-HSA-211191;R-HSA-211190;R-HSA-211206;R-HSA-211193;R-HSA-9029667;R-HSA-211224;R-HSA-211247
R-HSA-2990846	SUMOylation	1	192	0.012711864406779662	0.5810266225037921	0.5810266225037921	4	140	0.010149340292880962	9606	Homo sapiens	HDAC4		R-HSA-4615987;R-HSA-4615872;R-HSA-4720446;R-HSA-4720432
R-HSA-983712	Ion channel transport	1	206	0.013638771186440678	0.606950251313624	0.606950251313624	1	45	0.0032622879512831664	9606	Homo sapiens	ATP2B1		R-HSA-418309
R-HSA-71387	Metabolism of carbohydrates	2	456	0.030190677966101694	0.6123929895223327	0.6123929895223327	4	243	0.0176163549369291	9606	Homo sapiens	PIP;PYGL		R-HSA-2022061;R-HSA-71588;R-HSA-71590;R-HSA-453339
R-HSA-69275	G2/M Transition	1	212	0.014036016949152543	0.6175704519182691	0.6175704519182691	2	78	0.005654632448890822	9606	Homo sapiens	TPX2		R-HSA-8853405;R-HSA-8853419
R-HSA-453274	Mitotic G2-G2/M phases	1	214	0.014168432203389831	0.6210472925317867	0.6210472925317867	2	80	0.005799623024503407	9606	Homo sapiens	TPX2		R-HSA-8853405;R-HSA-8853419
R-HSA-9609690	HCMV Early Events	1	215	0.014234639830508475	0.622774014777288	0.622774014777288	4	12	8.699434536755111E-4	9606	Homo sapiens	EGFR		R-HSA-9610867;R-HSA-9611158;R-HSA-9611147;R-HSA-9609689
R-HSA-112314	Neurotransmitter receptors and postsynaptic signal transmission	1	232	0.015360169491525424	0.6509696545730304	0.6509696545730304	4	109	0.007901986370885893	9606	Homo sapiens	GNB1		R-HSA-1013020;R-HSA-1013013;R-HSA-500717;R-HSA-1013012
R-HSA-5357801	Programmed Cell Death	1	238	0.015757415254237288	0.6604167168257549	0.6604167168257549	10	197	0.01428157169783964	9606	Homo sapiens	CAD		R-HSA-211186;R-HSA-211239;R-HSA-211207;R-HSA-211191;R-HSA-211190;R-HSA-211206;R-HSA-211193;R-HSA-9029667;R-HSA-211224;R-HSA-211247
R-HSA-15869	Metabolism of nucleotides	1	256	0.01694915254237288	0.6872719976851974	0.6872719976851974	3	141	0.010221835580687256	9606	Homo sapiens	CAD		R-HSA-73571;R-HSA-73573;R-HSA-73577
R-HSA-196849	Metabolism of water-soluble vitamins and cofactors	1	258	0.01708156779661017	0.6901235372325136	0.6901235372325136	1	142	0.010294330868493549	9606	Homo sapiens	DHFR		R-HSA-9709098
R-HSA-156580	Phase II - Conjugation of compounds	1	263	0.01741260593220339	0.6971407846577271	0.6971407846577271	2	72	0.005219660722053067	9606	Homo sapiens	AS3MT		R-HSA-5696213;R-HSA-5696220
R-HSA-9609646	HCMV Infection	1	270	0.0178760593220339	0.7067025784001746	0.7067025784001746	4	31	0.0022473539219950702	9606	Homo sapiens	EGFR		R-HSA-9610867;R-HSA-9611158;R-HSA-9611147;R-HSA-9609689
R-HSA-76002	Platelet activation, signaling and aggregation	1	293	0.019398834745762712	0.7360731715367482	0.7360731715367482	18	116	0.00840945338552994	9606	Homo sapiens	GNB1		R-HSA-396996;R-HSA-397891;R-HSA-392195;R-HSA-428750;R-HSA-428909;R-HSA-428749;R-HSA-396941;R-HSA-397835;R-HSA-392202;R-HSA-428918;R-HSA-428917;R-HSA-418581;R-HSA-418579;R-HSA-428752;R-HSA-418576;R-HSA-114552;R-HSA-392187;R-HSA-114558
R-HSA-9664433	Leishmania parasite growth and survival	1	297	0.019663665254237288	0.7408765236971862	0.7408765236971862	3	40	0.0028998115122517037	9606	Homo sapiens	GNB1		R-HSA-9660819;R-HSA-9660824;R-HSA-9660828
R-HSA-9662851	Anti-inflammatory response favouring Leishmania parasite infection	1	297	0.019663665254237288	0.7408765236971862	0.7408765236971862	3	40	0.0028998115122517037	9606	Homo sapiens	GNB1		R-HSA-9660819;R-HSA-9660824;R-HSA-9660828
R-HSA-9006934	Signaling by Receptor Tyrosine Kinases	2	620	0.041048728813559324	0.77383257005353	0.77383257005353	71	746	0.054081484703494276	9606	Homo sapiens	EGFR		R-HSA-177922;R-HSA-1250195;R-HSA-177923;R-HSA-8848005;R-HSA-6785636;R-HSA-177926;R-HSA-177927;R-HSA-177924;R-HSA-177925;R-HSA-177930;R-HSA-183051;R-HSA-177934;R-HSA-1250463;R-HSA-177935;R-HSA-183055;R-HSA-1250462;R-HSA-177933;R-HSA-177938;R-HSA-183058;R-HSA-177939;R-HSA-177936;R-HSA-177937;R-HSA-177942;R-HSA-177943;R-HSA-177941;R-HSA-6785648;R-HSA-183067;R-HSA-8864029;R-HSA-177944;R-HSA-177945;R-…
R-HSA-1474244	Extracellular matrix organization	1	329	0.0217823093220339	0.7763263335460099	0.7763263335460099	4	319	0.023125996810207338	9606	Homo sapiens	P3H1		R-HSA-1980233;R-HSA-2022073;R-HSA-8948226;R-HSA-8948230
R-HSA-195721	Signaling by WNT	1	332	0.02198093220338983	0.7793937066134835	0.7793937066134835	5	157	0.011381760185587937	9606	Homo sapiens	GNB1		R-HSA-398193;R-HSA-3965444;R-HSA-3965447;R-HSA-3965441;R-HSA-398040
R-HSA-112315	Transmission across Chemical Synapses	1	343	0.022709216101694914	0.7902902496898643	0.7902902496898643	4	163	0.011816731912425693	9606	Homo sapiens	GNB1		R-HSA-1013020;R-HSA-1013013;R-HSA-500717;R-HSA-1013012
R-HSA-382551	Transport of small molecules	3	965	0.06389036016949153	0.8175537804988537	0.8175537804988537	5	443	0.03211541249818762	9606	Homo sapiens	PIP;GNB1;ATP2B1		R-HSA-418309;R-HSA-432195;R-HSA-422320;R-HSA-5252072;R-HSA-432188
R-HSA-73894	DNA Repair	1	381	0.02522510593220339	0.8240072453145668	0.8240072453145668	9	339	0.02457590256633319	9606	Homo sapiens	MAD2L2		R-HSA-5652151;R-HSA-5655892;R-HSA-5656148;R-HSA-110322;R-HSA-110311;R-HSA-5656158;R-HSA-5655965;R-HSA-5655835;R-HSA-5656105
R-HSA-196854	Metabolism of vitamins and cofactors	1	382	0.025291313559322032	0.8248182429154132	0.8248182429154132	2	204	0.01478903871248369	9606	Homo sapiens	DHFR		R-HSA-1497794;R-HSA-9709098
R-HSA-212436	Generic Transcription Pathway	5	1555	0.10295286016949153	0.8417120841975156	0.8417120841975156	7	830	0.06017108887922285	9606	Homo sapiens	HDAC4;TPX2;EGFR		R-HSA-8874789;R-HSA-8952062;R-HSA-6805103;R-HSA-8874797;R-HSA-8952069;R-HSA-350058;R-HSA-9008326
R-HSA-9658195	Leishmania infection	1	406	0.026880296610169493	0.8432144282436483	0.8432144282436483	3	95	0.006887052341597796	9606	Homo sapiens	GNB1		R-HSA-9660819;R-HSA-9660824;R-HSA-9660828
R-HSA-418594	G alpha (i) signalling events	1	426	0.028204449152542374	0.8570797932277239	0.8570797932277239	12	74	0.0053646512976656515	9606	Homo sapiens	GNB1		R-HSA-751001;R-HSA-167408;R-HSA-8982637;R-HSA-749454;R-HSA-420883;R-HSA-167429;R-HSA-8982640;R-HSA-167419;R-HSA-167433;R-HSA-749456;R-HSA-380073;R-HSA-112271
R-HSA-168249	Innate Immune System	4	1338	0.08858580508474577	0.86304256294863	0.86304256294863	3	710	0.05147165434246774	9606	Homo sapiens	PYGL;IQGAP2;IQGAP3;KRT6A		R-HSA-6798743;R-HSA-6800434;R-HSA-6798748
R-HSA-388396	GPCR downstream signalling	2	792	0.0524364406779661	0.8777502257259849	0.8777502257259849	47	173	0.012541684790488618	9606	Homo sapiens	GNB1;EGFR		R-HSA-749448;R-HSA-9036301;R-HSA-749454;R-HSA-749453;R-HSA-749452;R-HSA-750988;R-HSA-167429;R-HSA-167433;R-HSA-749446;R-HSA-8964614;R-HSA-112271;R-HSA-8964634;R-HSA-751001;R-HSA-8964317;R-HSA-420883;R-HSA-8964241;R-HSA-2179387;R-HSA-750993;R-HSA-9036307;R-HSA-749456;R-HSA-9624014;R-HSA-9036308;R-HSA-398040;R-HSA-751019;R-HSA-379044;R-HSA-392295;R-HSA-8982637;R-HSA-8964271;R-HSA-392300;R-HSA-38007…
R-HSA-73857	RNA Polymerase II Transcription	5	1697	0.11235434322033898	0.892182238545859	0.892182238545859	7	891	0.0645933014354067	9606	Homo sapiens	HDAC4;TPX2;EGFR		R-HSA-8874789;R-HSA-8952062;R-HSA-6805103;R-HSA-8874797;R-HSA-8952069;R-HSA-350058;R-HSA-9008326
R-HSA-3700989	Transcriptional Regulation by TP53	1	487	0.03224311440677966	0.8923271123135453	0.8923271123135453	1	259	0.018776279541829782	9606	Homo sapiens	TPX2		R-HSA-6805103
R-HSA-112316	Neuronal System	1	489	0.03237552966101695	0.8933243479158723	0.8933243479158723	4	216	0.0156589821661592	9606	Homo sapiens	GNB1		R-HSA-1013020;R-HSA-1013013;R-HSA-500717;R-HSA-1013012
R-HSA-372790	Signaling by GPCR	2	871	0.057666843220338986	0.9090789358968191	0.9090789358968191	48	360	0.02609830361026533	9606	Homo sapiens	GNB1;EGFR		R-HSA-749448;R-HSA-9036301;R-HSA-749454;R-HSA-749453;R-HSA-749452;R-HSA-750988;R-HSA-167429;R-HSA-167433;R-HSA-749446;R-HSA-8964614;R-HSA-112271;R-HSA-8964634;R-HSA-751001;R-HSA-420883;R-HSA-8964317;R-HSA-8964241;R-HSA-2179387;R-HSA-750993;R-HSA-9036307;R-HSA-749456;R-HSA-9624014;R-HSA-9036308;R-HSA-398040;R-HSA-751019;R-HSA-379044;R-HSA-392295;R-HSA-8982637;R-HSA-8964271;R-HSA-381612;R-HSA-39230…
R-HSA-211859	Biological oxidations	1	549	0.03634798728813559	0.9193552997863412	0.9193552997863412	2	188	0.013629114107583008	9606	Homo sapiens	AS3MT		R-HSA-5696213;R-HSA-5696220
R-HSA-422475	Axon guidance	1	585	0.03873146186440678	0.9318538187783532	0.9318538187783532	1	298	0.021603595766275192	9606	Homo sapiens	EGFR		R-HSA-445069
R-HSA-74160	Gene expression (Transcription)	5	1860	0.12314618644067797	0.9327690413396935	0.9327690413396935	7	1006	0.07293025953313034	9606	Homo sapiens	HDAC4;TPX2;EGFR		R-HSA-8874789;R-HSA-8952062;R-HSA-6805103;R-HSA-8874797;R-HSA-8952069;R-HSA-350058;R-HSA-9008326
R-HSA-168256	Immune System	8	2691	0.1781647245762712	0.9348506089657089	0.9348506089657089	8	1625	0.11780484268522547	9606	Homo sapiens	KIF2A;PYGL;IRF6;IQGAP2;IQGAP3;KRT6A		R-HSA-6798743;R-HSA-2213248;R-HSA-6800434;R-HSA-1015702;R-HSA-1031716;R-HSA-6798748;R-HSA-1015699;R-HSA-1031713
R-HSA-500792	GPCR ligand binding	1	606	0.0401218220338983	0.9382415972410207	0.9382415972410207	1	187	0.013556618819776715	9606	Homo sapiens	GNB1		R-HSA-381612
R-HSA-9675108	Nervous system development	1	621	0.041114936440677964	0.9424393547935639	0.9424393547935639	1	324	0.0234884732492388	9606	Homo sapiens	EGFR		R-HSA-445069
R-HSA-1280218	Adaptive Immune System	2	1012	0.0670021186440678	0.9473366456150897	0.9473366456150897	1	264	0.019138755980861243	9606	Homo sapiens	KIF2A		R-HSA-2213248
R-HSA-1280215	Cytokine Signaling in Immune system	2	1094	0.0724311440677966	0.9620193212387875	0.9620193212387875	4	710	0.05147165434246774	9606	Homo sapiens	IRF6		R-HSA-1015702;R-HSA-1031716;R-HSA-1015699;R-HSA-1031713
R-HSA-1643685	Disease	7	2651	0.1755164194915254	0.9660130223610914	0.9660130223610914	114	1708	0.12382195157314775	9606	Homo sapiens	HDAC4;GOLGA4;GNB1;IQGAP3;EGFR		R-HSA-9656211;R-HSA-9660819;R-HSA-9656209;R-HSA-1218833;R-HSA-9611158;R-HSA-9656215;R-HSA-9664918;R-HSA-9656214;R-HSA-9664664;R-HSA-9660824;R-HSA-1226014;R-HSA-1226012;R-HSA-9660828;R-HSA-1220610;R-HSA-9665411;R-HSA-1248002;R-HSA-1220611;R-HSA-9665410;R-HSA-9665409;R-HSA-9665408;R-HSA-1220614;R-HSA-9665415;R-HSA-9664646;R-HSA-1220612;R-HSA-9665413;R-HSA-1220613;R-HSA-9611147;R-HSA-9665417;R-HSA-9…
R-HSA-9709957	Sensory Perception	2	1262	0.08355402542372882	0.9809199133368014	0.9809199133368014	18	143	0.01036682615629984	9606	Homo sapiens	GNB1;ATP2B1		R-HSA-9717205;R-HSA-9717206;R-HSA-74882;R-HSA-9728752;R-HSA-9712208;R-HSA-9664214;R-HSA-9717202;R-HSA-9712210;R-HSA-9728723;R-HSA-9717182;R-HSA-9728697;R-HSA-9728729;R-HSA-9728748;R-HSA-2485180;R-HSA-2485182;R-HSA-9717193;R-HSA-9712201;R-HSA-9728747
R-HSA-381753	Olfactory Signaling Pathway	1	887	0.05872616525423729	0.9836812428434901	0.9836812428434901	3	13	9.424387414818037E-4	9606	Homo sapiens	GNB1		R-HSA-9712208;R-HSA-9712210;R-HSA-9712201
R-HSA-5663205	Infectious disease	2	1574	0.10421080508474577	0.9949891848360342	0.9949891848360342	7	825	0.05980861244019139	9606	Homo sapiens	GNB1;EGFR		R-HSA-9660819;R-HSA-9610867;R-HSA-9611158;R-HSA-9611147;R-HSA-9609689;R-HSA-9660824;R-HSA-9660828
R-HSA-1430728	Metabolism	7	3639	0.24092955508474576	0.9988748133779395	0.9988748133779395	20	2250	0.16311439756415833	9606	Homo sapiens	DHFR;AS3MT;PIP;GNB1;CAD;PYGL;IQGAP3		R-HSA-73571;R-HSA-5696213;R-HSA-400037;R-HSA-73573;R-HSA-71588;R-HSA-71590;R-HSA-400097;R-HSA-73577;R-HSA-400046;R-HSA-381612;R-HSA-5696220;R-HSA-381707;R-HSA-381706;R-HSA-2022061;R-HSA-825631;R-HSA-1497794;R-HSA-422320;R-HSA-400092;R-HSA-453339;R-HSA-9709098
R-HSA-597592	Post-translational protein modification	1	1605	0.10626324152542373	0.999518879140755	0.999518879140755	4	538	0.039002464839785415	9606	Homo sapiens	HDAC4		R-HSA-4615987;R-HSA-4615872;R-HSA-4720446;R-HSA-4720432
R-HSA-392499	Metabolism of proteins	2	2212	0.1464512711864407	0.9997331833571002	0.9997331833571002	12	810	0.058721183123097	9606	Homo sapiens	HDAC4;GNB1		R-HSA-6814119;R-HSA-383313;R-HSA-4615987;R-HSA-6814418;R-HSA-4615872;R-HSA-4720446;R-HSA-8850560;R-HSA-4720432;R-HSA-8850527;R-HSA-6814124;R-HSA-6814121;R-HSA-6814120
