# Supplementary material for: Promitotic Action of Oenothera biennis on Senescent Human Dermal Fibroblasts
Source: Int J Mol Sci. 2022 Dec 2;23(23):15153. doi: 10.3390/ijms232315153 (PMC9735661; doi:10.3390/ijms232315153)
Supplement: Supplementary file 1 [file ijms-23-15153-s001.zip › Table S6 Reactome enrichment analysis of downregulated proteins in senescent NHDF cells after ObHEx treatment.csv]

Pathway identifier	Pathway name	#Entities found	#Entities total	Entities ratio	Entities pValue	Entities FDR	#Reactions found	#Reactions total	Reactions ratio	Species identifier	Species name	Submitted entities found	Mapped entities	Found reaction identifiers
R-HSA-391160	Signal regulatory protein family interactions	3	18	0.0011917372881355933	4.719309129774807E-5	0.018405305606121747	10	10	7.249528780629259E-4	9606	Homo sapiens	SIRPA		R-HSA-391157;R-HSA-391156;R-HSA-210274;R-HSA-391158;R-HSA-391153;R-HSA-391152;R-HSA-391168;R-HSA-391155;R-HSA-391151;R-HSA-391150
R-HSA-1483255	PI Metabolism	4	112	0.007415254237288136	8.73108002484746E-4	0.16402132624140364	13	89	0.00645208061476004	9606	Homo sapiens	SYNJ1;MTMR9;PIK3C3		R-HSA-1675961;R-HSA-1676024;R-HSA-6809254;R-HSA-1675994;R-HSA-1675836;R-HSA-1676177;R-HSA-6809325;R-HSA-1675988;R-HSA-6809320;R-HSA-6809238;R-HSA-1676203;R-HSA-1675939;R-HSA-6809309
R-HSA-1660499	Synthesis of PIPs at the plasma membrane	3	69	0.004568326271186441	0.0023203416389205866	0.16402132624140364	9	33	0.0023923444976076554	9606	Homo sapiens	SYNJ1;MTMR9		R-HSA-6809254;R-HSA-1676203;R-HSA-1675994;R-HSA-1675836;R-HSA-1676177;R-HSA-6809325;R-HSA-6809309;R-HSA-1675988;R-HSA-6809320
R-HSA-1660517	Synthesis of PIPs at the late endosome membrane	2	22	0.0014565677966101695	0.003210442324919738	0.16402132624140364	2	7	5.074670146440482E-4	9606	Homo sapiens	MTMR9;PIK3C3		R-HSA-1676024;R-HSA-6809238
R-HSA-163615	PKA activation	2	23	0.0015227754237288136	0.0035004748467755142	0.16402132624140364	4	4	2.899811512251704E-4	9606	Homo sapiens	ADCY9;PRKAR2A		R-HSA-111925;R-HSA-8951727;R-HSA-111930;R-HSA-9668558
R-HSA-164378	PKA activation in glucagon signalling	2	23	0.0015227754237288136	0.0035004748467755142	0.16402132624140364	2	2	1.449905756125852E-4	9606	Homo sapiens	ADCY9;PRKAR2A		R-HSA-111925;R-HSA-164377
R-HSA-5358351	Signaling by Hedgehog	4	168	0.011122881355932203	0.003782851024187295	0.16402132624140364	10	82	0.005944613600115992	9606	Homo sapiens	ADAM17;ADCY9;PRKAR2A;PSMD2		R-HSA-5610757;R-HSA-5362448;R-HSA-5610727;R-HSA-5610758;R-HSA-5610754;R-HSA-5362793;R-HSA-5610749;R-HSA-5635868;R-HSA-5635854;R-HSA-5610760
R-HSA-111931	PKA-mediated phosphorylation of CREB	2	26	0.0017213983050847457	0.004440940540874405	0.16402132624140364	4	7	5.074670146440482E-4	9606	Homo sapiens	ADCY9;PRKAR2A		R-HSA-111925;R-HSA-8951727;R-HSA-111930;R-HSA-9668558
R-HSA-1483249	Inositol phosphate metabolism	3	90	0.005958686440677966	0.0048700502715386396	0.16402132624140364	5	71	0.005147165434246774	9606	Homo sapiens	SYNJ1;MTMR9;PLCD1		R-HSA-6809238;R-HSA-1855221;R-HSA-1855174;R-HSA-6809565;R-HSA-1855218
R-HSA-6803205	TP53 regulates transcription of several additional cell death genes whose specific roles in p53-dependent apoptosis remain uncertain	2	28	0.001853813559322034	0.005125666445043864	0.16402132624140364	4	19	0.0013774104683195593	9606	Homo sapiens	TP53I3		R-HSA-6799462;R-HSA-6799441;R-HSA-6799466;R-HSA-6799722
R-HSA-3000157	Laminin interactions	2	31	0.0020524364406779663	0.006237617560866826	0.16521451570478352	13	15	0.001087429317094389	9606	Homo sapiens	ITGA2;LAMC1		R-HSA-4084507;R-HSA-2426530;R-HSA-4084505;R-HSA-3907292;R-HSA-216051;R-HSA-2426676;R-HSA-2328145;R-HSA-216048;R-HSA-2426450;R-HSA-2396083;R-HSA-2327803;R-HSA-216058;R-HSA-349626
R-HSA-1855183	Synthesis of IP2, IP, and Ins in the cytosol	2	32	0.00211864406779661	0.0066305499996350825	0.16521451570478352	3	14	0.0010149340292880964	9606	Homo sapiens	SYNJ1;MTMR9		R-HSA-6809238;R-HSA-1855174;R-HSA-6809565
R-HSA-8874081	MET activates PTK2 signaling	2	32	0.00211864406779661	0.0066305499996350825	0.16521451570478352	1	5	3.6247643903146296E-4	9606	Homo sapiens	ITGA2;LAMC1		R-HSA-8874079
R-HSA-9759194	Nuclear events mediated by NFE2L2	3	106	0.007018008474576272	0.0076266588538296265	0.16521451570478352	3	46	0.003334783239089459	9606	Homo sapiens	PSMD2;GCLM		R-HSA-9760103;R-HSA-9762096;R-HSA-9760125
R-HSA-1855204	Synthesis of IP3 and IP4 in the cytosol	2	39	0.0025820974576271187	0.009684254810893855	0.16521451570478352	2	12	8.699434536755111E-4	9606	Homo sapiens	SYNJ1;PLCD1		R-HSA-1855221;R-HSA-1855218
R-HSA-163359	Glucagon signaling in metabolic regulation	2	40	0.0026483050847457626	0.010162801019467094	0.16521451570478352	3	6	4.3497172683775554E-4	9606	Homo sapiens	ADCY9;PRKAR2A		R-HSA-163617;R-HSA-111925;R-HSA-164377
R-HSA-114508	Effects of PIP2 hydrolysis	2	40	0.0026483050847457626	0.010162801019467094	0.16521451570478352	1	9	6.524575902566333E-4	9606	Homo sapiens	DGKA		R-HSA-426240
R-HSA-112314	Neurotransmitter receptors and postsynaptic signal transmission	4	232	0.015360169491525424	0.011524786203059412	0.16521451570478352	11	109	0.007901986370885893	9606	Homo sapiens	ADCY9;EPB41L1;PRKAR2A;PRKAB1		R-HSA-170674;R-HSA-9619542;R-HSA-9619478;R-HSA-111925;R-HSA-416320;R-HSA-8951727;R-HSA-170666;R-HSA-9619515;R-HSA-392206;R-HSA-170686;R-HSA-170671
R-HSA-5610787	Hedgehog 'off' state	3	124	0.008209745762711865	0.0116424534583357	0.16521451570478352	6	32	0.002319849209801363	9606	Homo sapiens	ADCY9;PRKAR2A;PSMD2		R-HSA-5610757;R-HSA-5610727;R-HSA-5610758;R-HSA-5610754;R-HSA-5610749;R-HSA-5610760
R-HSA-111933	Calmodulin induced events	2	43	0.0028469279661016947	0.011660075129888647	0.16521451570478352	4	23	0.0016673916195447296	9606	Homo sapiens	ADCY9;PRKAR2A		R-HSA-111925;R-HSA-8951727;R-HSA-111930;R-HSA-9668558
R-HSA-111997	CaM pathway	2	43	0.0028469279661016947	0.011660075129888647	0.16521451570478352	4	24	0.0017398869073510222	9606	Homo sapiens	ADCY9;PRKAR2A		R-HSA-111925;R-HSA-8951727;R-HSA-111930;R-HSA-9668558
R-HSA-5628897	TP53 Regulates Metabolic Genes	3	126	0.008342161016949153	0.012150703089055193	0.16521451570478352	5	34	0.002464839785413948	9606	Homo sapiens	TIGAR;PRKAB1		R-HSA-5631941;R-HSA-5628901;R-HSA-5628899;R-HSA-380927;R-HSA-5628905
R-HSA-8875878	MET promotes cell motility	2	45	0.002979343220338983	0.012708808900367963	0.16521451570478352	1	12	8.699434536755111E-4	9606	Homo sapiens	ITGA2;LAMC1		R-HSA-8874079
R-HSA-1500931	Cell-Cell communication	3	134	0.008871822033898306	0.014310414252631798	0.18603488923850575	10	60	0.004349717268377556	9606	Homo sapiens	SIRPA		R-HSA-391157;R-HSA-391156;R-HSA-210274;R-HSA-391158;R-HSA-391153;R-HSA-391152;R-HSA-391168;R-HSA-391155;R-HSA-391151;R-HSA-391150
R-HSA-111996	Ca-dependent events	2	48	0.0031779661016949155	0.014356132430676238	0.18603488923850575	4	27	0.0019573727707699	9606	Homo sapiens	ADCY9;PRKAR2A		R-HSA-111925;R-HSA-8951727;R-HSA-111930;R-HSA-9668558
R-HSA-165159	MTOR signalling	2	50	0.0033103813559322032	0.015502907436542146	0.18603488923850575	11	29	0.002102363346382485	9606	Homo sapiens	AKT1S1;PRKAB1		R-HSA-380949;R-HSA-447074;R-HSA-165718;R-HSA-200421;R-HSA-380930;R-HSA-377186;R-HSA-380927;R-HSA-5672828;R-HSA-5672843;R-HSA-165692;R-HSA-5672824
R-HSA-9755511	KEAP1-NFE2L2 pathway	3	141	0.009335275423728813	0.016368018698014963	0.18811592723426251	5	78	0.005654632448890822	9606	Homo sapiens	PSMD2;GCLM		R-HSA-9760103;R-HSA-9762096;R-HSA-9760125;R-HSA-8932355;R-HSA-9755306
R-HSA-432040	Vasopressin regulates renal water homeostasis via Aquaporins	2	53	0.003509004237288136	0.0172943491316766	0.18811592723426251	4	15	0.001087429317094389	9606	Homo sapiens	ADCY9;PRKAR2A		R-HSA-163617;R-HSA-111925;R-HSA-8951727;R-HSA-164377
R-HSA-1489509	DAG and IP3 signaling	2	53	0.003509004237288136	0.0172943491316766	0.18811592723426251	4	28	0.0020298680585761927	9606	Homo sapiens	ADCY9;PRKAR2A		R-HSA-111925;R-HSA-8951727;R-HSA-111930;R-HSA-9668558
R-HSA-5578999	Defective GCLC causes HAGGSD	1	5	3.310381355932203E-4	0.018695330822781075	0.18811592723426251	1	1	7.24952878062926E-5	9606	Homo sapiens	GCLM		R-HSA-5602892
R-HSA-9711123	Cellular response to chemical stress	4	269	0.017809851694915255	0.01881159272342625	0.18811592723426251	7	134	0.009714368566043206	9606	Homo sapiens	GPX1;PSMD2;GCLM		R-HSA-9760103;R-HSA-9762096;R-HSA-3323013;R-HSA-9760125;R-HSA-8932355;R-HSA-71676;R-HSA-9755306
R-HSA-9634597	GPER1 signaling	2	56	0.003707627118644068	0.019169482525681736	0.19169482525681736	4	10	7.249528780629259E-4	9606	Homo sapiens	ADCY9;PRKAR2A		R-HSA-163617;R-HSA-392129;R-HSA-111925;R-HSA-8951727
R-HSA-3000171	Non-integrin membrane-ECM interactions	2	61	0.004038665254237288	0.022475155114315526	0.2222829915514919	3	22	0.001594896331738437	9606	Homo sapiens	ITGA2;LAMC1		R-HSA-2328129;R-HSA-2426355;R-HSA-2731074
R-HSA-112043	PLC beta mediated events	2	67	0.004435911016949153	0.026728362079678325	0.2222829915514919	4	32	0.002319849209801363	9606	Homo sapiens	ADCY9;PRKAR2A		R-HSA-111925;R-HSA-8951727;R-HSA-111930;R-HSA-9668558
R-HSA-445717	Aquaporin-mediated transport	2	69	0.004568326271186441	0.028213031301894342	0.2222829915514919	4	25	0.0018123821951573148	9606	Homo sapiens	ADCY9;PRKAR2A		R-HSA-163617;R-HSA-111925;R-HSA-8951727;R-HSA-164377
R-HSA-5362798	Release of Hh-Np from the secreting cell	1	8	5.296610169491525E-4	0.02974725173381676	0.2222829915514919	1	5	3.6247643903146296E-4	9606	Homo sapiens	ADAM17		R-HSA-5362793
R-HSA-2660825	Signaling by NOTCH1 t(7;9)(NOTCH1:M1580_K2555) Translocation Mutant	1	8	5.296610169491525E-4	0.02974725173381676	0.2222829915514919	1	5	3.6247643903146296E-4	9606	Homo sapiens	ADAM17		R-HSA-2666278
R-HSA-2660826	Constitutive Signaling by NOTCH1 t(7;9)(NOTCH1:M1580_K2555) Translocation Mutant	1	8	5.296610169491525E-4	0.02974725173381676	0.2222829915514919	1	5	3.6247643903146296E-4	9606	Homo sapiens	ADAM17		R-HSA-2666278
R-HSA-5358346	Hedgehog ligand biogenesis	2	72	0.004766949152542373	0.03050084897760419	0.2222829915514919	2	15	0.001087429317094389	9606	Homo sapiens	ADAM17;PSMD2		R-HSA-5362448;R-HSA-5362793
R-HSA-196071	Metabolism of steroid hormones	2	72	0.004766949152542373	0.03050084897760419	0.2222829915514919	4	40	0.0028998115122517037	9606	Homo sapiens	FDXR;HSD17B12		R-HSA-193064;R-HSA-193065;R-HSA-193054;R-HSA-193101
R-HSA-1483257	Phospholipid metabolism	4	314	0.020789194915254237	0.030867666980864072	0.2222829915514919	13	218	0.015803972741771786	9606	Homo sapiens	SYNJ1;MTMR9;PIK3C3		R-HSA-1675961;R-HSA-1676024;R-HSA-6809254;R-HSA-1675994;R-HSA-1675836;R-HSA-1676177;R-HSA-6809325;R-HSA-1675988;R-HSA-6809320;R-HSA-6809238;R-HSA-1676203;R-HSA-1675939;R-HSA-6809309
R-HSA-112040	G-protein mediated events	2	73	0.004833156779661017	0.031279394980744946	0.2222829915514919	13	41	0.002972306800057996	9606	Homo sapiens	ADCY9;PRKAR2A		R-HSA-8951727;R-HSA-170666;R-HSA-392206;R-HSA-170671;R-HSA-170674;R-HSA-170672;R-HSA-111925;R-HSA-170676;R-HSA-170677;R-HSA-111930;R-HSA-170686;R-HSA-9668558;R-HSA-170685
R-HSA-5579026	Defective CYP11A1 causes AICSR	1	9	5.958686440677966E-4	0.03340397886189106	0.2222829915514919	1	1	7.24952878062926E-5	9606	Homo sapiens	FDXR		R-HSA-5580269
R-HSA-2262752	Cellular responses to stress	8	1001	0.0662738347457627	0.03358502076115144	0.2222829915514919	16	444	0.03218790778599391	9606	Homo sapiens	GPX1;PSMD2;AKT1S1;HSPA4L;GCLM;MAP4K4		R-HSA-5251955;R-HSA-9762096;R-HSA-5251959;R-HSA-5082405;R-HSA-9760125;R-HSA-3225851;R-HSA-8932355;R-HSA-9760103;R-HSA-5251942;R-HSA-3323013;R-HSA-5252041;R-HSA-3225867;R-HSA-1234159;R-HSA-71676;R-HSA-9755306;R-HSA-5252079
R-HSA-3000178	ECM proteoglycans	2	79	0.005230402542372881	0.03611327773244344	0.2222829915514919	2	23	0.0016673916195447296	9606	Homo sapiens	ITGA2;LAMC1		R-HSA-2396124;R-HSA-2681667
R-HSA-3700989	Transcriptional Regulation by TP53	5	487	0.03224311440677966	0.03653806561467943	0.2222829915514919	10	259	0.018776279541829782	9606	Homo sapiens	TIGAR;TP53I3;PRKAB1		R-HSA-5631941;R-HSA-5628901;R-HSA-6799462;R-HSA-6799441;R-HSA-5628899;R-HSA-6805470;R-HSA-380927;R-HSA-5628905;R-HSA-6799466;R-HSA-6799722
R-HSA-8953897	Cellular responses to stimuli	8	1019	0.0674655720338983	0.036756011559764934	0.2222829915514919	16	475	0.03443526170798898	9606	Homo sapiens	GPX1;PSMD2;AKT1S1;HSPA4L;GCLM;MAP4K4		R-HSA-5251955;R-HSA-9762096;R-HSA-5251959;R-HSA-5082405;R-HSA-9760125;R-HSA-3225851;R-HSA-8932355;R-HSA-9760103;R-HSA-5251942;R-HSA-3323013;R-HSA-5252041;R-HSA-3225867;R-HSA-1234159;R-HSA-71676;R-HSA-9755306;R-HSA-5252079
R-HSA-9749641	Aspirin ADME	2	80	0.005296610169491525	0.03694540056491635	0.2222829915514919	2	26	0.0018848774829636073	9606	Homo sapiens	CES2		R-HSA-9749792;R-HSA-9749647
R-HSA-2395516	Electron transport from NADPH to Ferredoxin	1	10	6.620762711864406E-4	0.03704716525858198	0.2222829915514919	2	2	1.449905756125852E-4	9606	Homo sapiens	FDXR		R-HSA-2395517;R-HSA-2395512
R-HSA-426117	Cation-coupled Chloride cotransporters	1	10	6.620762711864406E-4	0.03704716525858198	0.2222829915514919	1	3	2.1748586341887777E-4	9606	Homo sapiens	SLC12A4		R-HSA-426155
R-HSA-447041	CHL1 interactions	1	10	6.620762711864406E-4	0.03704716525858198	0.2222829915514919	1	5	3.6247643903146296E-4	9606	Homo sapiens	ITGA2		R-HSA-445088
R-HSA-5633008	TP53 Regulates Transcription of Cell Death Genes	2	83	0.005495233050847458	0.03948583662333072	0.22678657660663093	4	68	0.004929679570827896	9606	Homo sapiens	TP53I3		R-HSA-6799462;R-HSA-6799441;R-HSA-6799466;R-HSA-6799722
R-HSA-112315	Transmission across Chemical Synapses	4	343	0.022709216101694914	0.040599769033658806	0.22678657660663093	11	163	0.011816731912425693	9606	Homo sapiens	ADCY9;EPB41L1;PRKAR2A;PRKAB1		R-HSA-170674;R-HSA-9619542;R-HSA-9619478;R-HSA-111925;R-HSA-416320;R-HSA-8951727;R-HSA-170666;R-HSA-9619515;R-HSA-392206;R-HSA-170686;R-HSA-170671
R-HSA-9010642	ROBO receptors bind AKAP5	1	11	7.282838983050848E-4	0.04067686017262484	0.22678657660663093	1	7	5.074670146440482E-4	9606	Homo sapiens	PRKAR2A		R-HSA-9010641
R-HSA-5579029	Metabolic disorders of biological oxidation enzymes	2	87	0.005760063559322034	0.042973494921329625	0.22678657660663093	2	38	0.0027548209366391185	9606	Homo sapiens	FDXR;GCLM		R-HSA-5580269;R-HSA-5602892
R-HSA-6806834	Signaling by MET	2	88	0.005826271186440678	0.04386291431796796	0.22678657660663093	1	51	0.0036972596781209223	9606	Homo sapiens	ITGA2;LAMC1		R-HSA-8874079
R-HSA-193692	Regulated proteolysis of p75NTR	1	12	7.944915254237289E-4	0.044293112676884405	0.22678657660663093	1	5	3.6247643903146296E-4	9606	Homo sapiens	ADAM17		R-HSA-193679
R-HSA-9613354	Lipophagy	1	12	7.944915254237289E-4	0.044293112676884405	0.22678657660663093	1	5	3.6247643903146296E-4	9606	Homo sapiens	PRKAB1		R-HSA-9613530
R-HSA-2151209	Activation of PPARGC1A (PGC-1alpha) by phosphorylation	1	13	8.606991525423729E-4	0.04789597166894721	0.22678657660663093	1	2	1.449905756125852E-4	9606	Homo sapiens	PRKAB1		R-HSA-1592244
R-HSA-9006925	Intracellular signaling by second messengers	4	368	0.024364406779661018	0.050249489222231825	0.22678657660663093	6	114	0.008264462809917356	9606	Homo sapiens	ADCY9;PRKAR2A;PSMD2;AKT1S1		R-HSA-111925;R-HSA-8850992;R-HSA-8951727;R-HSA-111930;R-HSA-200143;R-HSA-9668558
R-HSA-438064	Post NMDA receptor activation events	2	96	0.006355932203389831	0.05122060609227086	0.22678657660663093	5	39	0.002827316224445411	9606	Homo sapiens	PRKAR2A;PRKAB1		R-HSA-9619542;R-HSA-9619478;R-HSA-111925;R-HSA-8951727;R-HSA-9619515
R-HSA-9662834	CD163 mediating an anti-inflammatory response	1	14	9.26906779661017E-4	0.051485485871772596	0.22678657660663093	6	9	6.524575902566333E-4	9606	Homo sapiens	ADAM17		R-HSA-9662786;R-HSA-9662818;R-HSA-9662823;R-HSA-9662837;R-HSA-9662773;R-HSA-9662747
R-HSA-211859	Biological oxidations	5	549	0.03634798728813559	0.05591044832820402	0.22678657660663093	4	188	0.013629114107583008	9606	Homo sapiens	FDXR;ABHD14B;GCLM;CES2		R-HSA-5695964;R-HSA-174367;R-HSA-5693691;R-HSA-193101
R-HSA-2691230	Signaling by NOTCH1 HD Domain Mutants in Cancer	1	16	0.001059322033898305	0.05862467393197224	0.22678657660663093	1	6	4.3497172683775554E-4	9606	Homo sapiens	ADAM17		R-HSA-2730752
R-HSA-75892	Platelet Adhesion to exposed collagen	1	16	0.001059322033898305	0.05862467393197224	0.22678657660663093	1	6	4.3497172683775554E-4	9606	Homo sapiens	ITGA2		R-HSA-114563
R-HSA-2691232	Constitutive Signaling by NOTCH1 HD Domain Mutants	1	16	0.001059322033898305	0.05862467393197224	0.22678657660663093	1	6	4.3497172683775554E-4	9606	Homo sapiens	ADAM17		R-HSA-2730752
R-HSA-198323	AKT phosphorylates targets in the cytosol	1	16	0.001059322033898305	0.05862467393197224	0.22678657660663093	1	9	6.524575902566333E-4	9606	Homo sapiens	AKT1S1		R-HSA-200143
R-HSA-170660	Adenylate cyclase activating pathway	1	17	0.0011255296610169492	0.0621744443675184	0.22678657660663093	4	4	2.899811512251704E-4	9606	Homo sapiens	ADCY9		R-HSA-170672;R-HSA-170676;R-HSA-170677;R-HSA-170685
R-HSA-442720	CREB1 phosphorylation through the activation of Adenylate Cyclase	1	17	0.0011255296610169492	0.0621744443675184	0.22678657660663093	2	6	4.3497172683775554E-4	9606	Homo sapiens	PRKAR2A		R-HSA-111925;R-HSA-8951727
R-HSA-2160916	Hyaluronan uptake and degradation	1	18	0.0011917372881355933	0.06571106317139686	0.22678657660663093	2	10	7.249528780629259E-4	9606	Homo sapiens	CHP1		R-HSA-2160884;R-HSA-2160892
R-HSA-111885	Opioid Signalling	2	113	0.00748146186440678	0.06817609571322403	0.22678657660663093	13	59	0.0042772219805712625	9606	Homo sapiens	ADCY9;PRKAR2A		R-HSA-8951727;R-HSA-170666;R-HSA-392206;R-HSA-170671;R-HSA-170674;R-HSA-170672;R-HSA-111925;R-HSA-170676;R-HSA-170677;R-HSA-111930;R-HSA-170686;R-HSA-9668558;R-HSA-170685
R-HSA-442755	Activation of NMDA receptors and postsynaptic events	2	113	0.00748146186440678	0.06817609571322403	0.22678657660663093	5	71	0.005147165434246774	9606	Homo sapiens	PRKAR2A;PRKAB1		R-HSA-9619542;R-HSA-9619478;R-HSA-111925;R-HSA-8951727;R-HSA-9619515
R-HSA-2559580	Oxidative Stress Induced Senescence	2	114	0.007547669491525424	0.06922491739844105	0.22678657660663093	2	40	0.0028998115122517037	9606	Homo sapiens	MAP4K4		R-HSA-3225851;R-HSA-3225867
R-HSA-170670	Adenylate cyclase inhibitory pathway	1	19	0.0012579449152542372	0.06923457820247447	0.22678657660663093	5	5	3.6247643903146296E-4	9606	Homo sapiens	ADCY9		R-HSA-170674;R-HSA-170666;R-HSA-392206;R-HSA-170686;R-HSA-170671
R-HSA-2142712	Synthesis of 12-eicosatetraenoic acid derivatives	1	19	0.0012579449152542372	0.06923457820247447	0.22678657660663093	2	6	4.3497172683775554E-4	9606	Homo sapiens	GPX1		R-HSA-2161959;R-HSA-2161999
R-HSA-1430728	Metabolism	19	3639	0.24092955508474576	0.07337903156038872	0.22678657660663093	43	2250	0.16311439756415833	9606	Homo sapiens	PANK2;GPX1;ABHD14B;MTMR9;GLRX;HSD17B12;SARS1;ADCY9;SYNJ1;PRKAR2A;PSMD2;FDXR;CHP1;PIK3C3;GCLM;CES2;PLCD1		R-HSA-6809254;R-HSA-1675994;R-HSA-111746;R-HSA-2161959;R-HSA-1676177;R-HSA-5695964;R-HSA-6809325;R-HSA-1675988;R-HSA-381707;R-HSA-6809320;R-HSA-193101;R-HSA-2160884;R-HSA-2395517;R-HSA-548818;R-HSA-1855174;R-HSA-164377;R-HSA-2160892;R-HSA-2395512;R-HSA-193054;R-HSA-174367;R-HSA-2161791;R-HSA-353125;R-HSA-1675961;R-HSA-1676024;R-HSA-8866405;R-HSA-163617;R-HSA-1675836;R-HSA-1855221;R-HSA-2408526;R-…
R-HSA-196783	Coenzyme A biosynthesis	1	21	0.0013903601694915254	0.07624248752728224	0.22678657660663093	1	7	5.074670146440482E-4	9606	Homo sapiens	PANK2		R-HSA-196857
R-HSA-2142770	Synthesis of 15-eicosatetraenoic acid derivatives	1	22	0.0014565677966101695	0.07972697668611983	0.22678657660663093	1	4	2.899811512251704E-4	9606	Homo sapiens	GPX1		R-HSA-2161791
R-HSA-109582	Hemostasis	6	803	0.05316472457627119	0.08144412339501073	0.22678657660663093	4	334	0.024213426127301724	9606	Homo sapiens	PRKAR2A;DGKA;ITGA2;SIRPA		R-HSA-114563;R-HSA-426240;R-HSA-992708;R-HSA-202703
R-HSA-2142845	Hyaluronan metabolism	1	23	0.0015227754237288136	0.08319855180357583	0.22678657660663093	2	13	9.424387414818037E-4	9606	Homo sapiens	CHP1		R-HSA-2160884;R-HSA-2160892
R-HSA-9679504	Translation of Replicase and Assembly of the Replication Transcription Complex	1	23	0.0015227754237288136	0.08319855180357583	0.22678657660663093	1	30	0.002174858634188778	9606	Homo sapiens	PIK3C3		R-HSA-9687435
R-HSA-2142688	Synthesis of 5-eicosatetraenoic acids	1	24	0.0015889830508474577	0.08665725988947659	0.22678657660663093	1	4	2.899811512251704E-4	9606	Homo sapiens	GPX1		R-HSA-2161946
R-HSA-9694676	Translation of Replicase and Assembly of the Replication Transcription Complex	1	24	0.0015889830508474577	0.08665725988947659	0.22678657660663093	1	29	0.002102363346382485	9606	Homo sapiens	PIK3C3		R-HSA-9698265
R-HSA-373760	L1CAM interactions	2	130	0.008606991525423728	0.0867000726036894	0.22678657660663093	2	54	0.0039147455415398	9606	Homo sapiens	ITGA2;LAMC1		R-HSA-443778;R-HSA-445088
R-HSA-5620916	VxPx cargo-targeting to cilium	1	25	0.0016551906779661016	0.09010314778562845	0.22678657660663093	8	10	7.249528780629259E-4	9606	Homo sapiens	ASAP1		R-HSA-5623525;R-HSA-5623524;R-HSA-5623527;R-HSA-5620918;R-HSA-5623521;R-HSA-5623519;R-HSA-5623513;R-HSA-5620921
R-HSA-1362409	Mitochondrial iron-sulfur cluster biogenesis	1	25	0.0016551906779661016	0.09010314778562845	0.22678657660663093	2	6	4.3497172683775554E-4	9606	Homo sapiens	FDXR		R-HSA-2395517;R-HSA-2395512
R-HSA-3371556	Cellular response to heat stress	2	135	0.00893802966101695	0.09240932565196736	0.22678657660663093	6	29	0.002102363346382485	9606	Homo sapiens	HSPA4L;AKT1S1		R-HSA-5251955;R-HSA-5251942;R-HSA-5251959;R-HSA-5082405;R-HSA-5252041;R-HSA-5252079
R-HSA-196108	Pregnenolone biosynthesis	1	27	0.0017876059322033898	0.09695664953926719	0.22678657660663093	3	9	6.524575902566333E-4	9606	Homo sapiens	FDXR		R-HSA-193065;R-HSA-193054;R-HSA-193101
R-HSA-193048	Androgen biosynthesis	1	27	0.0017876059322033898	0.09695664953926719	0.22678657660663093	1	9	6.524575902566333E-4	9606	Homo sapiens	HSD17B12		R-HSA-193064
R-HSA-174403	Glutathione synthesis and recycling	1	27	0.0017876059322033898	0.09695664953926719	0.22678657660663093	1	9	6.524575902566333E-4	9606	Homo sapiens	GCLM		R-HSA-174367
R-HSA-2022377	Metabolism of Angiotensinogen to Angiotensins	1	27	0.0017876059322033898	0.09695664953926719	0.22678657660663093	1	20	0.0014499057561258518	9606	Homo sapiens	CES2		R-HSA-9619024
R-HSA-9664323	FCGR3A-mediated IL10 synthesis	2	141	0.009335275423728813	0.0994019503945548	0.22678657660663093	3	20	0.0014499057561258518	9606	Homo sapiens	ADCY9;PRKAR2A		R-HSA-111925;R-HSA-8951727;R-HSA-111930
R-HSA-166208	mTORC1-mediated signalling	1	28	0.001853813559322034	0.10036435624552942	0.22678657660663093	2	8	5.799623024503408E-4	9606	Homo sapiens	AKT1S1		R-HSA-165718;R-HSA-165692
R-HSA-9662851	Anti-inflammatory response favouring Leishmania parasite infection	3	297	0.019663665254237288	0.10200905543418204	0.22678657660663093	11	40	0.0028998115122517037	9606	Homo sapiens	ADAM17;ADCY9;PRKAR2A		R-HSA-9662786;R-HSA-9662818;R-HSA-163617;R-HSA-9662823;R-HSA-392129;R-HSA-111925;R-HSA-9662837;R-HSA-9662773;R-HSA-8951727;R-HSA-9662747;R-HSA-111930
R-HSA-9664433	Leishmania parasite growth and survival	3	297	0.019663665254237288	0.10200905543418204	0.22678657660663093	11	40	0.0028998115122517037	9606	Homo sapiens	ADAM17;ADCY9;PRKAR2A		R-HSA-9662786;R-HSA-9662818;R-HSA-163617;R-HSA-9662823;R-HSA-392129;R-HSA-111925;R-HSA-9662837;R-HSA-9662773;R-HSA-8951727;R-HSA-9662747;R-HSA-111930
R-HSA-211945	Phase I - Functionalization of compounds	3	299	0.019796080508474576	0.10355165312918724	0.22678657660663093	2	98	0.007104538205016674	9606	Homo sapiens	FDXR;CES2		R-HSA-5693691;R-HSA-193101
R-HSA-3000170	Syndecan interactions	1	29	0.001920021186440678	0.10375942846074504	0.22678657660663093	1	15	0.001087429317094389	9606	Homo sapiens	ITGA2		R-HSA-2731074
R-HSA-5674400	Constitutive Signaling by AKT1 E17K in Cancer	1	29	0.001920021186440678	0.10375942846074504	0.22678657660663093	1	18	0.0013049151805132667	9606	Homo sapiens	AKT1S1		R-HSA-2399977
R-HSA-982772	Growth hormone receptor signaling	1	29	0.001920021186440678	0.10375942846074504	0.22678657660663093	1	28	0.0020298680585761927	9606	Homo sapiens	ADAM17		R-HSA-1168777
R-HSA-163685	Integration of energy metabolism	2	145	0.00960010593220339	0.104144800964735	0.22678657660663093	4	62	0.0044947078439901405	9606	Homo sapiens	ADCY9;PRKAR2A		R-HSA-163617;R-HSA-111925;R-HSA-164377;R-HSA-381707
R-HSA-1474228	Degradation of the extracellular matrix	2	148	0.009798728813559322	0.1077424491841622	0.22678657660663093	2	105	0.007612005219660722	9606	Homo sapiens	ADAM17;LAMC1		R-HSA-2168960;R-HSA-2533874
R-HSA-1632852	Macroautophagy	2	150	0.00993114406779661	0.11015950569093091	0.22678657660663093	15	87	0.006307090039147456	9606	Homo sapiens	PIK3C3;PRKAB1		R-HSA-1632857;R-HSA-5682388;R-HSA-5682385;R-HSA-9613530;R-HSA-5675868;R-HSA-5679239;R-HSA-5679205;R-HSA-5679266;R-HSA-5665868;R-HSA-5672012;R-HSA-5672011;R-HSA-5678315;R-HSA-5672008;R-HSA-5673768;R-HSA-5678313
R-HSA-1660516	Synthesis of PIPs at the early endosome membrane	1	31	0.0020524364406779663	0.11051185329542523	0.22678657660663093	1	13	9.424387414818037E-4	9606	Homo sapiens	PIK3C3		R-HSA-1675939
R-HSA-112316	Neuronal System	4	489	0.03237552966101695	0.1129326077646533	0.22678657660663093	13	216	0.0156589821661592	9606	Homo sapiens	ADCY9;EPB41L1;PRKAR2A;PRKAB1		R-HSA-9619542;R-HSA-9619478;R-HSA-416320;R-HSA-8951727;R-HSA-6797568;R-HSA-170666;R-HSA-9619515;R-HSA-392206;R-HSA-170671;R-HSA-170674;R-HSA-111925;R-HSA-6797553;R-HSA-170686
R-HSA-1660514	Synthesis of PIPs at the Golgi membrane	1	32	0.00211864406779661	0.11386929744285601	0.22678657660663093	1	11	7.974481658692185E-4	9606	Homo sapiens	PIK3C3		R-HSA-1675961
R-HSA-2122948	Activated NOTCH1 Transmits Signal to the Nucleus	1	32	0.00211864406779661	0.11386929744285601	0.22678657660663093	1	21	0.0015224010439321444	9606	Homo sapiens	ADAM17		R-HSA-157632
R-HSA-5663202	Diseases of signal transduction by growth factor receptors and second messengers	4	498	0.03297139830508475	0.11857897253536398	0.22678657660663093	8	478	0.034652747571407856	9606	Homo sapiens	ADAM17;PSMD2;AKT1S1;LMO7		R-HSA-2220976;R-HSA-2220944;R-HSA-9700181;R-HSA-5387392;R-HSA-9700179;R-HSA-2730752;R-HSA-2399977;R-HSA-2666278
R-HSA-9619483	Activation of AMPK downstream of NMDARs	1	34	0.0022510593220338984	0.12054687679172471	0.22678657660663093	3	3	2.1748586341887777E-4	9606	Homo sapiens	PRKAB1		R-HSA-9619542;R-HSA-9619478;R-HSA-9619515
R-HSA-9660821	ADORA2B mediated anti-inflammatory cytokines production	2	159	0.010527012711864406	0.12121065816153553	0.22678657660663093	4	12	8.699434536755111E-4	9606	Homo sapiens	ADCY9;PRKAR2A		R-HSA-163617;R-HSA-392129;R-HSA-111925;R-HSA-8951727
R-HSA-8856828	Clathrin-mediated endocytosis	2	161	0.010659427966101694	0.12370321485979108	0.22678657660663093	9	35	0.0025373350732202406	9606	Homo sapiens	SYNJ1		R-HSA-8868661;R-HSA-8868660;R-HSA-8868659;R-HSA-8868658;R-HSA-8869438;R-HSA-8868651;R-HSA-8871194;R-HSA-8871193;R-HSA-8868648
R-HSA-180024	DARPP-32 events	1	35	0.0023172669491525423	0.12386710254266076	0.22678657660663093	2	12	8.699434536755111E-4	9606	Homo sapiens	PRKAR2A		R-HSA-111925;R-HSA-8951727
R-HSA-199220	Vitamin B5 (pantothenate) metabolism	1	35	0.0023172669491525423	0.12386710254266076	0.22678657660663093	1	12	8.699434536755111E-4	9606	Homo sapiens	PANK2		R-HSA-196857
R-HSA-380972	Energy dependent regulation of mTOR by LKB1-AMPK	1	36	0.0023834745762711866	0.12717501244111817	0.22678657660663093	5	7	5.074670146440482E-4	9606	Homo sapiens	PRKAB1		R-HSA-380949;R-HSA-447074;R-HSA-200421;R-HSA-380930;R-HSA-380927
R-HSA-1474244	Extracellular matrix organization	3	329	0.0217823093220339	0.12777314292051356	0.22678657660663093	30	319	0.023125996810207338	9606	Homo sapiens	ADAM17;ITGA2;LAMC1		R-HSA-114563;R-HSA-2473511;R-HSA-2426530;R-HSA-2467436;R-HSA-4084910;R-HSA-2426676;R-HSA-2533874;R-HSA-2426355;R-HSA-2396083;R-HSA-2327803;R-HSA-2168960;R-HSA-4088220;R-HSA-2328129;R-HSA-4084507;R-HSA-4084505;R-HSA-3907292;R-HSA-216040;R-HSA-2731074;R-HSA-2681667;R-HSA-2327695;R-HSA-216051;R-HSA-2328145;R-HSA-4085133;R-HSA-216048;R-HSA-4086216;R-HSA-2426450;R-HSA-2396124;R-HSA-216058;R-HSA-247055…
R-HSA-9612973	Autophagy	2	166	0.010990466101694915	0.12998923628784687	0.22678657660663093	15	108	0.0078294910830796	9606	Homo sapiens	PIK3C3;PRKAB1		R-HSA-1632857;R-HSA-5682388;R-HSA-5682385;R-HSA-9613530;R-HSA-5675868;R-HSA-5679239;R-HSA-5679205;R-HSA-5679266;R-HSA-5665868;R-HSA-5672012;R-HSA-5672011;R-HSA-5678315;R-HSA-5672008;R-HSA-5673768;R-HSA-5678313
R-HSA-399719	Trafficking of AMPA receptors	1	37	0.0024496822033898305	0.1304706513580024	0.22678657660663093	1	4	2.899811512251704E-4	9606	Homo sapiens	EPB41L1		R-HSA-416320
R-HSA-5668599	RHO GTPases Activate NADPH Oxidases	1	38	0.0025158898305084744	0.1337540640036955	0.22678657660663093	1	14	0.0010149340292880964	9606	Homo sapiens	PIK3C3		R-HSA-6798174
R-HSA-399721	Glutamate binding, activation of AMPA receptors and synaptic plasticity	1	39	0.0025820974576271187	0.1370252949286297	0.22678657660663093	1	9	6.524575902566333E-4	9606	Homo sapiens	EPB41L1		R-HSA-416320
R-HSA-9619665	EGR2 and SOX10-mediated initiation of Schwann cell myelination	1	39	0.0025820974576271187	0.1370252949286297	0.22678657660663093	2	26	0.0018848774829636073	9606	Homo sapiens	LAMC1		R-HSA-9619666;R-HSA-9619668
R-HSA-418555	G alpha (s) signalling events	2	187	0.01238082627118644	0.15714404089918588	0.22678657660663093	4	26	0.0018848774829636073	9606	Homo sapiens	ADCY9;PRKAR2A		R-HSA-163617;R-HSA-392129;R-HSA-111925;R-HSA-8951727
R-HSA-8953750	Transcriptional Regulation by E2F6	1	46	0.0030455508474576272	0.15958653212569274	0.22678657660663093	8	33	0.0023923444976076554	9606	Homo sapiens	CHP1		R-HSA-9007465;R-HSA-9007464;R-HSA-9007467;R-HSA-8953452;R-HSA-9007283;R-HSA-8953556;R-HSA-9007447;R-HSA-9007462
R-HSA-1251985	Nuclear signaling by ERBB4	1	47	0.003111758474576271	0.16276189408976482	0.22678657660663093	1	34	0.002464839785413948	9606	Homo sapiens	ADAM17		R-HSA-1251992
R-HSA-427389	ERCC6 (CSB) and EHMT2 (G9a) positively regulate rRNA expression	1	48	0.0031779661016949155	0.16592546818099685	0.22678657660663093	1	4	2.899811512251704E-4	9606	Homo sapiens	CHP1		R-HSA-427383
R-HSA-991365	Activation of GABAB receptors	1	50	0.0033103813559322032	0.17221742451685118	0.22678657660663093	5	8	5.799623024503408E-4	9606	Homo sapiens	ADCY9		R-HSA-170674;R-HSA-170666;R-HSA-392206;R-HSA-170686;R-HSA-170671
R-HSA-977444	GABA B receptor activation	1	50	0.0033103813559322032	0.17221742451685118	0.22678657660663093	5	9	6.524575902566333E-4	9606	Homo sapiens	ADCY9		R-HSA-170674;R-HSA-170666;R-HSA-392206;R-HSA-170686;R-HSA-170671
R-HSA-211733	Regulation of activated PAK-2p34 by proteasome mediated degradation	1	50	0.0033103813559322032	0.17221742451685118	0.22678657660663093	1	2	1.449905756125852E-4	9606	Homo sapiens	PSMD2		R-HSA-211715
R-HSA-381676	Glucagon-like Peptide-1 (GLP1) regulates insulin secretion	1	50	0.0033103813559322032	0.17221742451685118	0.22678657660663093	1	11	7.974481658692185E-4	9606	Homo sapiens	PRKAR2A		R-HSA-381707
R-HSA-379716	Cytosolic tRNA aminoacylation	1	50	0.0033103813559322032	0.17221742451685118	0.22678657660663093	1	21	0.0015224010439321444	9606	Homo sapiens	SARS1		R-HSA-379992
R-HSA-9748784	Drug ADME	2	199	0.013175317796610169	0.17311629868706824	0.22678657660663093	2	78	0.005654632448890822	9606	Homo sapiens	CES2		R-HSA-9749792;R-HSA-9749647
R-HSA-2559583	Cellular Senescence	2	200	0.013241525423728813	0.17445974493372585	0.22678657660663093	2	90	0.006524575902566333	9606	Homo sapiens	MAP4K4		R-HSA-3225851;R-HSA-3225867
R-HSA-350562	Regulation of ornithine decarboxylase (ODC)	1	51	0.0033765889830508476	0.17534589226328412	0.22678657660663093	1	4	2.899811512251704E-4	9606	Homo sapiens	PSMD2		R-HSA-353125
R-HSA-75876	Synthesis of very long-chain fatty acyl-CoAs	1	51	0.0033765889830508476	0.17534589226328412	0.22678657660663093	1	12	8.699434536755111E-4	9606	Homo sapiens	HSD17B12		R-HSA-548818
R-HSA-75893	TNF signaling	1	51	0.0033765889830508476	0.17534589226328412	0.22678657660663093	1	32	0.002319849209801363	9606	Homo sapiens	ADAM17		R-HSA-3371385
R-HSA-422475	Axon guidance	4	585	0.03873146186440678	0.17901633523686866	0.22678657660663093	4	298	0.021603595766275192	9606	Homo sapiens	PRKAR2A;ITGA2;PSMD2;LAMC1		R-HSA-443778;R-HSA-445088;R-HSA-9011313;R-HSA-9010641
R-HSA-180534	Vpu mediated degradation of CD4	1	53	0.003509004237288136	0.18156801952085488	0.22678657660663093	1	5	3.6247643903146296E-4	9606	Homo sapiens	PSMD2		R-HSA-180573
R-HSA-1236978	Cross-presentation of soluble exogenous antigens (endosomes)	1	53	0.003509004237288136	0.18156801952085488	0.22678657660663093	1	6	4.3497172683775554E-4	9606	Homo sapiens	PSMD2		R-HSA-1236970
R-HSA-2172127	DAP12 interactions	1	53	0.003509004237288136	0.18156801952085488	0.22678657660663093	1	33	0.0023923444976076554	9606	Homo sapiens	SIRPA		R-HSA-210274
R-HSA-69601	Ubiquitin Mediated Degradation of Phosphorylated Cdc25A	1	54	0.0035752118644067797	0.18466176361858866	0.22678657660663093	1	4	2.899811512251704E-4	9606	Homo sapiens	PSMD2		R-HSA-69600
R-HSA-69610	p53-Independent DNA Damage Response	1	54	0.0035752118644067797	0.18466176361858866	0.22678657660663093	1	4	2.899811512251704E-4	9606	Homo sapiens	PSMD2		R-HSA-69600
R-HSA-9762114	GSK3B and BTRC:CUL1-mediated-degradation of NFE2L2	1	54	0.0035752118644067797	0.18466176361858866	0.22678657660663093	1	4	2.899811512251704E-4	9606	Homo sapiens	PSMD2		R-HSA-9762096
R-HSA-69613	p53-Independent G1/S DNA damage checkpoint	1	54	0.0035752118644067797	0.18466176361858866	0.22678657660663093	1	4	2.899811512251704E-4	9606	Homo sapiens	PSMD2		R-HSA-69600
R-HSA-349425	Autodegradation of the E3 ubiquitin ligase COP1	1	54	0.0035752118644067797	0.18466176361858866	0.22678657660663093	1	5	3.6247643903146296E-4	9606	Homo sapiens	PSMD2		R-HSA-264458
R-HSA-169911	Regulation of Apoptosis	1	54	0.0035752118644067797	0.18466176361858866	0.22678657660663093	1	5	3.6247643903146296E-4	9606	Homo sapiens	PSMD2		R-HSA-211715
R-HSA-75815	Ubiquitin-dependent degradation of Cyclin D	1	54	0.0035752118644067797	0.18466176361858866	0.22678657660663093	1	5	3.6247643903146296E-4	9606	Homo sapiens	PSMD2		R-HSA-75825
R-HSA-2514859	Inactivation, recovery and regulation of the phototransduction cascade	1	54	0.0035752118644067797	0.18466176361858866	0.22678657660663093	2	19	0.0013774104683195593	9606	Homo sapiens	NCS1		R-HSA-74885;R-HSA-2586748
R-HSA-8854050	FBXL7 down-regulates AURKA during mitotic entry and in early mitosis	1	55	0.0036414194915254236	0.18774401750100755	0.22678657660663093	2	6	4.3497172683775554E-4	9606	Homo sapiens	PSMD2		R-HSA-8854071;R-HSA-8854044
R-HSA-174113	SCF-beta-TrCP mediated degradation of Emi1	1	55	0.0036414194915254236	0.18774401750100755	0.22678657660663093	1	3	2.1748586341887777E-4	9606	Homo sapiens	PSMD2		R-HSA-174203
R-HSA-180585	Vif-mediated degradation of APOBEC3G	1	56	0.003707627118644068	0.19081482308368602	0.22678657660663093	1	4	2.899811512251704E-4	9606	Homo sapiens	PSMD2		R-HSA-180603
R-HSA-450408	AUF1 (hnRNP D0) binds and destabilizes mRNA	1	56	0.003707627118644068	0.19081482308368602	0.22678657660663093	1	4	2.899811512251704E-4	9606	Homo sapiens	PSMD2		R-HSA-450466
R-HSA-5620920	Cargo trafficking to the periciliary membrane	1	57	0.003773834745762712	0.19387422213206829	0.22678657660663093	8	27	0.0019573727707699	9606	Homo sapiens	ASAP1		R-HSA-5623525;R-HSA-5623524;R-HSA-5623527;R-HSA-5620918;R-HSA-5623521;R-HSA-5623519;R-HSA-5623513;R-HSA-5620921
R-HSA-4641258	Degradation of DVL	1	57	0.003773834745762712	0.19387422213206829	0.22678657660663093	2	7	5.074670146440482E-4	9606	Homo sapiens	PSMD2		R-HSA-1504193;R-HSA-4641260
R-HSA-4641257	Degradation of AXIN	1	57	0.003773834745762712	0.19387422213206829	0.22678657660663093	2	8	5.799623024503408E-4	9606	Homo sapiens	PSMD2		R-HSA-3640874;R-HSA-4641256
R-HSA-9604323	Negative regulation of NOTCH4 signaling	1	57	0.003773834745762712	0.19387422213206829	0.22678657660663093	1	6	4.3497172683775554E-4	9606	Homo sapiens	PSMD2		R-HSA-9604642
R-HSA-8941858	Regulation of RUNX3 expression and activity	1	57	0.003773834745762712	0.19387422213206829	0.22678657660663093	1	9	6.524575902566333E-4	9606	Homo sapiens	PSMD2		R-HSA-8952408
R-HSA-109704	PI3K Cascade	1	58	0.003840042372881356	0.19692225626197601	0.22678657660663093	1	6	4.3497172683775554E-4	9606	Homo sapiens	PIK3C3		R-HSA-109699
R-HSA-9658195	Leishmania infection	3	406	0.026880296610169493	0.19762491181972563	0.22678657660663093	11	95	0.006887052341597796	9606	Homo sapiens	ADAM17;ADCY9;PRKAR2A		R-HSA-9662786;R-HSA-9662818;R-HSA-163617;R-HSA-9662823;R-HSA-392129;R-HSA-111925;R-HSA-9662837;R-HSA-9662773;R-HSA-8951727;R-HSA-9662747;R-HSA-111930
R-HSA-3371571	HSF1-dependent transactivation	1	59	0.00390625	0.1999589669401648	0.22678657660663093	1	8	5.799623024503408E-4	9606	Homo sapiens	AKT1S1		R-HSA-5082405
R-HSA-2514856	The phototransduction cascade	1	59	0.00390625	0.1999589669401648	0.22678657660663093	2	27	0.0019573727707699	9606	Homo sapiens	NCS1		R-HSA-74885;R-HSA-2586748
R-HSA-69541	Stabilization of p53	1	59	0.00390625	0.1999589669401648	0.22678657660663093	1	15	0.001087429317094389	9606	Homo sapiens	PSMD2		R-HSA-264458
R-HSA-6794361	Neurexins and neuroligins	1	60	0.003972457627118644	0.20298439548482794	0.22678657660663093	2	19	0.0013774104683195593	9606	Homo sapiens	EPB41L1		R-HSA-6797553;R-HSA-6797568
R-HSA-9006934	Signaling by Receptor Tyrosine Kinases	4	620	0.041048728813559324	0.20587595401773884	0.22678657660663093	4	746	0.054081484703494276	9606	Homo sapiens	ADAM17;ITGA2;PIK3C3;LAMC1		R-HSA-109699;R-HSA-8874079;R-HSA-177946;R-HSA-1251992
R-HSA-73772	RNA Polymerase I Promoter Escape	1	61	0.004038665254237288	0.20599858306612395	0.22678657660663093	1	2	1.449905756125852E-4	9606	Homo sapiens	CHP1		R-HSA-74986
R-HSA-5362768	Hh mutants are degraded by ERAD	1	61	0.004038665254237288	0.20599858306612395	0.22678657660663093	1	6	4.3497172683775554E-4	9606	Homo sapiens	PSMD2		R-HSA-5387392
R-HSA-5676590	NIK-->noncanonical NF-kB signaling	1	61	0.004038665254237288	0.20599858306612395	0.22678657660663093	1	9	6.524575902566333E-4	9606	Homo sapiens	PSMD2		R-HSA-5607731
R-HSA-177929	Signaling by EGFR	1	61	0.004038665254237288	0.20599858306612395	0.22678657660663093	1	49	0.003552269102508337	9606	Homo sapiens	ADAM17		R-HSA-177946
R-HSA-9675108	Nervous system development	4	621	0.041114936440677964	0.20666109452957449	0.22678657660663093	6	324	0.0234884732492388	9606	Homo sapiens	PRKAR2A;ITGA2;PSMD2;LAMC1		R-HSA-9619666;R-HSA-443778;R-HSA-445088;R-HSA-9619668;R-HSA-9011313;R-HSA-9010641
R-HSA-5610780	Degradation of GLI1 by the proteasome	1	62	0.0041048728813559325	0.20900157070670222	0.22678657660663093	2	6	4.3497172683775554E-4	9606	Homo sapiens	PSMD2		R-HSA-5610758;R-HSA-5610760
R-HSA-5610783	Degradation of GLI2 by the proteasome	1	62	0.0041048728813559325	0.20900157070670222	0.22678657660663093	1	5	3.6247643903146296E-4	9606	Homo sapiens	PSMD2		R-HSA-5610757
R-HSA-5610785	GLI3 is processed to GLI3R by the proteasome	1	62	0.0041048728813559325	0.20900157070670222	0.22678657660663093	1	5	3.6247643903146296E-4	9606	Homo sapiens	PSMD2		R-HSA-5610754
R-HSA-187577	SCF(Skp2)-mediated degradation of p27/p21	1	62	0.0041048728813559325	0.20900157070670222	0.22678657660663093	1	7	5.074670146440482E-4	9606	Homo sapiens	PSMD2		R-HSA-187574
R-HSA-418597	G alpha (z) signalling events	1	63	0.004171080508474576	0.21199339928220184	0.22678657660663093	2	13	9.424387414818037E-4	9606	Homo sapiens	ADCY9		R-HSA-392129;R-HSA-392064
R-HSA-174084	Autodegradation of Cdh1 by Cdh1:APC/C	1	64	0.00423728813559322	0.2149741095217983	0.22678657660663093	1	2	1.449905756125852E-4	9606	Homo sapiens	PSMD2		R-HSA-174058
R-HSA-5387390	Hh mutants abrogate ligand secretion	1	64	0.00423728813559322	0.2149741095217983	0.22678657660663093	1	7	5.074670146440482E-4	9606	Homo sapiens	PSMD2		R-HSA-5387392
R-HSA-9662361	Sensory processing of sound by outer hair cells of the cochlea	1	64	0.00423728813559322	0.2149741095217983	0.22678657660663093	1	8	5.799623024503408E-4	9606	Homo sapiens	EPB41L1		R-HSA-9663363
R-HSA-112399	IRS-mediated signalling	1	65	0.004303495762711864	0.21794374200869926	0.22678657660663093	1	9	6.524575902566333E-4	9606	Homo sapiens	PIK3C3		R-HSA-109699
R-HSA-4608870	Asymmetric localization of PCP proteins	1	66	0.004369703389830508	0.22090233718066732	0.22678657660663093	1	7	5.074670146440482E-4	9606	Homo sapiens	PSMD2		R-HSA-4608855
R-HSA-5678895	Defective CFTR causes cystic fibrosis	1	66	0.004369703389830508	0.22090233718066732	0.22678657660663093	1	7	5.074670146440482E-4	9606	Homo sapiens	PSMD2		R-HSA-8866858
R-HSA-5607761	Dectin-1 mediated noncanonical NF-kB signaling	1	66	0.004369703389830508	0.22090233718066732	0.22678657660663093	1	9	6.524575902566333E-4	9606	Homo sapiens	PSMD2		R-HSA-5607731
R-HSA-9725370	Signaling by ALK fusions and activated point mutants	1	66	0.004369703389830508	0.22090233718066732	0.22678657660663093	2	29	0.002102363346382485	9606	Homo sapiens	LMO7		R-HSA-9700181;R-HSA-9700179
R-HSA-9700206	Signaling by ALK in cancer	1	66	0.004369703389830508	0.22090233718066732	0.22678657660663093	2	37	0.0026823256488328257	9606	Homo sapiens	LMO7		R-HSA-9700181;R-HSA-9700179
R-HSA-376176	Signaling by ROBO receptors	2	235	0.015558792372881356	0.22237613667745304	0.22678657660663093	2	60	0.004349717268377556	9606	Homo sapiens	PRKAR2A;PSMD2		R-HSA-9011313;R-HSA-9010641
R-HSA-977443	GABA receptor activation	1	68	0.004502118644067797	0.22678657660663093	0.22678657660663093	5	12	8.699434536755111E-4	9606	Homo sapiens	ADCY9		R-HSA-170674;R-HSA-170666;R-HSA-392206;R-HSA-170686;R-HSA-170671
R-HSA-174154	APC/C:Cdc20 mediated degradation of Securin	1	68	0.004502118644067797	0.22678657660663093	0.22678657660663093	1	3	2.1748586341887777E-4	9606	Homo sapiens	PSMD2		R-HSA-174202
R-HSA-2644603	Signaling by NOTCH1 in Cancer	1	68	0.004502118644067797	0.22678657660663093	0.22678657660663093	4	39	0.002827316224445411	9606	Homo sapiens	ADAM17		R-HSA-2220976;R-HSA-2220944;R-HSA-2730752;R-HSA-2666278
R-HSA-156590	Glutathione conjugation	1	68	0.004502118644067797	0.22678657660663093	0.22678657660663093	1	14	0.0010149340292880964	9606	Homo sapiens	GCLM		R-HSA-174367
R-HSA-3299685	Detoxification of Reactive Oxygen Species	1	68	0.004502118644067797	0.22678657660663093	0.22678657660663093	2	34	0.002464839785413948	9606	Homo sapiens	GPX1		R-HSA-3323013;R-HSA-71676
R-HSA-2644606	Constitutive Signaling by NOTCH1 PEST Domain Mutants	1	68	0.004502118644067797	0.22678657660663093	0.22678657660663093	1	21	0.0015224010439321444	9606	Homo sapiens	ADAM17		R-HSA-2220944
R-HSA-2894862	Constitutive Signaling by NOTCH1 HD+PEST Domain Mutants	1	68	0.004502118644067797	0.22678657660663093	0.22678657660663093	1	21	0.0015224010439321444	9606	Homo sapiens	ADAM17		R-HSA-2220976
R-HSA-2644602	Signaling by NOTCH1 PEST Domain Mutants in Cancer	1	68	0.004502118644067797	0.22678657660663093	0.22678657660663093	1	21	0.0015224010439321444	9606	Homo sapiens	ADAM17		R-HSA-2220944
R-HSA-2894858	Signaling by NOTCH1 HD+PEST Domain Mutants in Cancer	1	68	0.004502118644067797	0.22678657660663093	0.22678657660663093	1	21	0.0015224010439321444	9606	Homo sapiens	ADAM17		R-HSA-2220976
R-HSA-379724	tRNA Aminoacylation	1	68	0.004502118644067797	0.22678657660663093	0.22678657660663093	1	42	0.003044802087864289	9606	Homo sapiens	SARS1		R-HSA-379992
R-HSA-2428928	IRS-related events triggered by IGF1R	1	69	0.004568326271186441	0.2297123010134946	0.2297123010134946	1	12	8.699434536755111E-4	9606	Homo sapiens	PIK3C3		R-HSA-109699
R-HSA-1442490	Collagen degradation	1	69	0.004568326271186441	0.2297123010134946	0.2297123010134946	1	34	0.002464839785413948	9606	Homo sapiens	ADAM17		R-HSA-2168960
R-HSA-372790	Signaling by GPCR	5	871	0.057666843220338986	0.23107904620169606	0.23107904620169606	18	360	0.02609830361026533	9606	Homo sapiens	ADCY9;PRKAR2A;DGKA;PSMD2		R-HSA-163617;R-HSA-392129;R-HSA-392064;R-HSA-426240;R-HSA-8951727;R-HSA-170666;R-HSA-392206;R-HSA-170671;R-HSA-170674;R-HSA-170672;R-HSA-8877620;R-HSA-111925;R-HSA-170676;R-HSA-170677;R-HSA-111930;R-HSA-170686;R-HSA-9668558;R-HSA-170685
R-HSA-69563	p53-Dependent G1 DNA Damage Response	1	70	0.0046345338983050845	0.2326271484121616	0.2326271484121616	1	22	0.001594896331738437	9606	Homo sapiens	PSMD2		R-HSA-264458
R-HSA-69580	p53-Dependent G1/S DNA damage checkpoint	1	70	0.0046345338983050845	0.2326271484121616	0.2326271484121616	1	22	0.001594896331738437	9606	Homo sapiens	PSMD2		R-HSA-264458
R-HSA-5658442	Regulation of RAS by GAPs	1	71	0.004700741525423728	0.23553115852078566	0.23553115852078566	1	5	3.6247643903146296E-4	9606	Homo sapiens	PSMD2		R-HSA-5658430
R-HSA-1169091	Activation of NF-kappaB in B cells	1	72	0.004766949152542373	0.23842437091510016	0.23842437091510016	1	10	7.249528780629259E-4	9606	Homo sapiens	PSMD2		R-HSA-1168640
R-HSA-1234176	Oxygen-dependent proline hydroxylation of Hypoxia-inducible Factor Alpha	1	72	0.004766949152542373	0.23842437091510016	0.23842437091510016	1	12	8.699434536755111E-4	9606	Homo sapiens	PSMD2		R-HSA-1234159
R-HSA-69615	G1/S DNA Damage Checkpoints	1	72	0.004766949152542373	0.23842437091510016	0.23842437091510016	2	26	0.0018848774829636073	9606	Homo sapiens	PSMD2		R-HSA-69600;R-HSA-264458
R-HSA-2428924	IGF1R signaling cascade	1	72	0.004766949152542373	0.23842437091510016	0.23842437091510016	1	17	0.001232419892706974	9606	Homo sapiens	PIK3C3		R-HSA-109699
R-HSA-211976	Endogenous sterols	1	72	0.004766949152542373	0.23842437091510016	0.23842437091510016	1	18	0.0013049151805132667	9606	Homo sapiens	FDXR		R-HSA-193101
R-HSA-156584	Cytosolic sulfonation of small molecules	1	72	0.004766949152542373	0.23842437091510016	0.23842437091510016	1	24	0.0017398869073510222	9606	Homo sapiens	ABHD14B		R-HSA-5695964
R-HSA-74751	Insulin receptor signalling cascade	1	72	0.004766949152542373	0.23842437091510016	0.23842437091510016	1	25	0.0018123821951573148	9606	Homo sapiens	PIK3C3		R-HSA-109699
R-HSA-174184	Cdc20:Phospho-APC/C mediated degradation of Cyclin A	1	73	0.004833156779661017	0.24130682502894807	0.24130682502894807	1	3	2.1748586341887777E-4	9606	Homo sapiens	PSMD2		R-HSA-174255
R-HSA-68949	Orc1 removal from chromatin	1	73	0.004833156779661017	0.24130682502894807	0.24130682502894807	1	4	2.899811512251704E-4	9606	Homo sapiens	PSMD2		R-HSA-68948
R-HSA-2404192	Signaling by Type 1 Insulin-like Growth Factor 1 Receptor (IGF1R)	1	73	0.004833156779661017	0.24130682502894807	0.24130682502894807	1	19	0.0013774104683195593	9606	Homo sapiens	PIK3C3		R-HSA-109699
R-HSA-8951664	Neddylation	2	249	0.016485699152542374	0.2418724249235572	0.2418724249235572	11	44	0.003189792663476874	9606	Homo sapiens	PSMD2;LMO7		R-HSA-8956184;R-HSA-8956040;R-HSA-8956200;R-HSA-8955289;R-HSA-8955241;R-HSA-8952618;R-HSA-9755303;R-HSA-8956140;R-HSA-8952620;R-HSA-8932355;R-HSA-9755306
R-HSA-174178	APC/C:Cdh1 mediated degradation of Cdc20 and other APC/C:Cdh1 targeted proteins in late mitosis/early G1	1	74	0.004899364406779661	0.24417856015476203	0.24417856015476203	2	6	4.3497172683775554E-4	9606	Homo sapiens	PSMD2		R-HSA-174105;R-HSA-188191
R-HSA-179419	APC:Cdc20 mediated degradation of cell cycle proteins prior to satisfation of the cell cycle checkpoint	1	74	0.004899364406779661	0.24417856015476203	0.24417856015476203	1	6	4.3497172683775554E-4	9606	Homo sapiens	PSMD2		R-HSA-174255
R-HSA-8948751	Regulation of PTEN stability and activity	1	74	0.004899364406779661	0.24417856015476203	0.24417856015476203	1	13	9.424387414818037E-4	9606	Homo sapiens	PSMD2		R-HSA-8850992
R-HSA-69017	CDK-mediated phosphorylation and removal of Cdc6	1	75	0.004965572033898305	0.24703961544407183	0.24703961544407183	1	4	2.899811512251704E-4	9606	Homo sapiens	PSMD2		R-HSA-69016
R-HSA-176409	APC/C:Cdc20 mediated degradation of mitotic proteins	1	76	0.005031779661016949	0.24989002990798082	0.24989002990798082	2	13	9.424387414818037E-4	9606	Homo sapiens	PSMD2		R-HSA-174202;R-HSA-174255
R-HSA-9662360	Sensory processing of sound by inner hair cells of the cochlea	1	76	0.005031779661016949	0.24989002990798082	0.24989002990798082	1	7	5.074670146440482E-4	9606	Homo sapiens	EPB41L1		R-HSA-9659380
R-HSA-176814	Activation of APC/C and APC/C:Cdc20 mediated degradation of mitotic proteins	1	77	0.0050979872881355935	0.2527298424176896	0.2527298424176896	2	15	0.001087429317094389	9606	Homo sapiens	PSMD2		R-HSA-174202;R-HSA-174255
R-HSA-202733	Cell surface interactions at the vascular wall	2	257	0.017015360169491525	0.25305587461429446	0.25305587461429446	1	65	0.0047121937074090185	9606	Homo sapiens	SIRPA		R-HSA-202703
R-HSA-157118	Signaling by NOTCH	2	259	0.017147775423728813	0.2558547843094736	0.2558547843094736	2	154	0.011164274322169059	9606	Homo sapiens	ADAM17;PSMD2		R-HSA-9604642;R-HSA-157632
R-HSA-5250913	Positive epigenetic regulation of rRNA expression	1	80	0.005296610169491525	0.26118605484514545	0.26118605484514545	1	7	5.074670146440482E-4	9606	Homo sapiens	CHP1		R-HSA-427383
R-HSA-499943	Interconversion of nucleotide di- and triphosphates	1	80	0.005296610169491525	0.26118605484514545	0.26118605484514545	3	33	0.0023923444976076554	9606	Homo sapiens	GLRX		R-HSA-8866405;R-HSA-111746;R-HSA-111742
R-HSA-351202	Metabolism of polyamines	1	80	0.005296610169491525	0.26118605484514545	0.26118605484514545	1	17	0.001232419892706974	9606	Homo sapiens	PSMD2		R-HSA-353125
R-HSA-156580	Phase II - Conjugation of compounds	2	263	0.01741260593220339	0.26145505716028117	0.26145505716028117	2	72	0.005219660722053067	9606	Homo sapiens	ABHD14B;GCLM		R-HSA-5695964;R-HSA-174367
R-HSA-1445148	Translocation of SLC2A4 (GLUT4) to the plasma membrane	1	81	0.005362817796610169	0.2639838454688642	0.2639838454688642	1	15	0.001087429317094389	9606	Homo sapiens	PRKAB1		R-HSA-1454699
R-HSA-75105	Fatty acyl-CoA biosynthesis	1	81	0.005362817796610169	0.2639838454688642	0.2639838454688642	1	24	0.0017398869073510222	9606	Homo sapiens	HSD17B12		R-HSA-548818
R-HSA-1236394	Signaling by ERBB4	1	82	0.005429025423728814	0.26677122641277917	0.26677122641277917	1	52	0.0037697549659272147	9606	Homo sapiens	ADAM17		R-HSA-1251992
R-HSA-8939902	Regulation of RUNX2 expression and activity	1	83	0.005495233050847458	0.26954823571886544	0.26954823571886544	4	32	0.002319849209801363	9606	Homo sapiens	PSMD2		R-HSA-8939801;R-HSA-9008475;R-HSA-9008110;R-HSA-9009362
R-HSA-8852276	The role of GTSE1 in G2/M progression after G2 checkpoint	1	83	0.005495233050847458	0.26954823571886544	0.26954823571886544	1	10	7.249528780629259E-4	9606	Homo sapiens	PSMD2		R-HSA-8852354
R-HSA-176408	Regulation of APC/C activators between G1/S and early anaphase	1	83	0.005495233050847458	0.26954823571886544	0.26954823571886544	1	14	0.0010149340292880964	9606	Homo sapiens	PSMD2		R-HSA-174203
R-HSA-983169	Class I MHC mediated antigen processing & presentation	3	479	0.03171345338983051	0.27056969840712397	0.27056969840712397	8	48	0.0034797738147020443	9606	Homo sapiens	PSMD2;PIK3C3;LMO7		R-HSA-983150;R-HSA-983147;R-HSA-1236935;R-HSA-1236970;R-HSA-983157;R-HSA-983156;R-HSA-983140;R-HSA-983426
R-HSA-6798695	Neutrophil degranulation	3	480	0.03177966101694915	0.271595599290809	0.271595599290809	5	10	7.249528780629259E-4	9606	Homo sapiens	PSMD2;SIRPA		R-HSA-6798743;R-HSA-6800434;R-HSA-6798748;R-HSA-6798747;R-HSA-6800426
R-HSA-1980143	Signaling by NOTCH1	1	84	0.005561440677966102	0.2723149112925981	0.2723149112925981	1	39	0.002827316224445411	9606	Homo sapiens	ADAM17		R-HSA-157632
R-HSA-73854	RNA Polymerase I Promoter Clearance	1	85	0.0056276483050847455	0.27507129090341376	0.27507129090341376	1	10	7.249528780629259E-4	9606	Homo sapiens	CHP1		R-HSA-74986
R-HSA-216083	Integrin cell surface interactions	1	86	0.005693855932203389	0.27781741218521794	0.27781741218521794	10	55	0.003987240829346092	9606	Homo sapiens	ITGA2		R-HSA-4084910;R-HSA-114563;R-HSA-2473511;R-HSA-4088220;R-HSA-4085133;R-HSA-4086216;R-HSA-2467436;R-HSA-216040;R-HSA-2327695;R-HSA-2470555
R-HSA-1234174	Cellular response to hypoxia	1	86	0.005693855932203389	0.27781741218521794	0.27781741218521794	1	20	0.0014499057561258518	9606	Homo sapiens	PSMD2		R-HSA-1234159
R-HSA-9659379	Sensory processing of sound	1	87	0.005760063559322034	0.2805533126368439	0.2805533126368439	2	13	9.424387414818037E-4	9606	Homo sapiens	EPB41L1		R-HSA-9663363;R-HSA-9659380
R-HSA-73864	RNA Polymerase I Transcription	1	87	0.005760063559322034	0.2805533126368439	0.2805533126368439	1	14	0.0010149340292880964	9606	Homo sapiens	CHP1		R-HSA-74986
R-HSA-69202	Cyclin E associated events during G1/S transition	1	88	0.005826271186440678	0.28327902962253293	0.28327902962253293	1	20	0.0014499057561258518	9606	Homo sapiens	PSMD2		R-HSA-187574
R-HSA-9663891	Selective autophagy	1	89	0.005892478813559322	0.2859946003724131	0.2859946003724131	1	48	0.0034797738147020443	9606	Homo sapiens	PRKAB1		R-HSA-9613530
R-HSA-69656	Cyclin A:Cdk2-associated events at S phase entry	1	90	0.005958686440677966	0.2887000619829537	0.2887000619829537	1	19	0.0013774104683195593	9606	Homo sapiens	PSMD2		R-HSA-187574
R-HSA-416476	G alpha (q) signalling events	2	284	0.018802966101694914	0.29086246563031026	0.29086246563031026	1	35	0.0025373350732202406	9606	Homo sapiens	DGKA		R-HSA-426240
R-HSA-1168372	Downstream signaling events of B Cell Receptor (BCR)	1	91	0.006024894067796611	0.2913954514174636	0.2913954514174636	1	15	0.001087429317094389	9606	Homo sapiens	PSMD2		R-HSA-1168640
R-HSA-195253	Degradation of beta-catenin by the destruction complex	1	91	0.006024894067796611	0.2913954514174636	0.2913954514174636	1	23	0.0016673916195447296	9606	Homo sapiens	PSMD2		R-HSA-2130282
R-HSA-453276	Regulation of mitotic cell cycle	1	92	0.0060911016949152545	0.2940808055065418	0.2940808055065418	6	40	0.0028998115122517037	9606	Homo sapiens	PSMD2		R-HSA-174058;R-HSA-174202;R-HSA-174203;R-HSA-174105;R-HSA-188191;R-HSA-174255
R-HSA-174143	APC/C-mediated degradation of cell cycle proteins	1	92	0.0060911016949152545	0.2940808055065418	0.2940808055065418	6	40	0.0028998115122517037	9606	Homo sapiens	PSMD2		R-HSA-174058;R-HSA-174202;R-HSA-174203;R-HSA-174105;R-HSA-188191;R-HSA-174255
R-HSA-9013404	RAC2 GTPase cycle	1	92	0.0060911016949152545	0.2940808055065418	0.2940808055065418	1	10	7.249528780629259E-4	9606	Homo sapiens	TAOK3		R-HSA-9014294
R-HSA-5632684	Hedgehog 'on' state	1	92	0.0060911016949152545	0.2940808055065418	0.2940808055065418	2	37	0.0026823256488328257	9606	Homo sapiens	PSMD2		R-HSA-5635868;R-HSA-5635854
R-HSA-9013694	Signaling by NOTCH4	1	92	0.0060911016949152545	0.2940808055065418	0.2940808055065418	1	20	0.0014499057561258518	9606	Homo sapiens	PSMD2		R-HSA-9604642
R-HSA-6794362	Protein-protein interactions at synapses	1	93	0.006157309322033898	0.29675616094855006	0.29675616094855006	2	33	0.0023923444976076554	9606	Homo sapiens	EPB41L1		R-HSA-6797553;R-HSA-6797568
R-HSA-450531	Regulation of mRNA stability by proteins that bind AU-rich elements	1	93	0.006157309322033898	0.29675616094855006	0.29675616094855006	1	26	0.0018848774829636073	9606	Homo sapiens	PSMD2		R-HSA-450466
R-HSA-69052	Switching of origins to a post-replicative state	1	94	0.006223516949152542	0.2994215543100832	0.2994215543100832	2	10	7.249528780629259E-4	9606	Homo sapiens	PSMD2		R-HSA-68948;R-HSA-69016
R-HSA-6804756	Regulation of TP53 Activity through Phosphorylation	1	95	0.006289724576271186	0.30207702202641584	0.30207702202641584	1	26	0.0018848774829636073	9606	Homo sapiens	PRKAB1		R-HSA-6805470
R-HSA-556833	Metabolism of lipids	7	1446	0.09573622881355932	0.3026879039345187	0.3026879039345187	22	955	0.06923299985500943	9606	Homo sapiens	GPX1;SYNJ1;FDXR;MTMR9;PIK3C3;HSD17B12		R-HSA-1675961;R-HSA-1676024;R-HSA-6809254;R-HSA-1675994;R-HSA-1675836;R-HSA-2161959;R-HSA-1676177;R-HSA-193064;R-HSA-6809325;R-HSA-193065;R-HSA-1675988;R-HSA-2161999;R-HSA-6809320;R-HSA-193101;R-HSA-6809238;R-HSA-1676203;R-HSA-548818;R-HSA-1675939;R-HSA-2161946;R-HSA-6809309;R-HSA-193054;R-HSA-2161791
R-HSA-76002	Platelet activation, signaling and aggregation	2	293	0.019398834745762712	0.3034397777541993	0.3034397777541993	1	116	0.00840945338552994	9606	Homo sapiens	DGKA		R-HSA-426240
R-HSA-9678108	SARS-CoV-1 Infection	1	96	0.006355932203389831	0.30472260040199173	0.30472260040199173	1	114	0.008264462809917356	9606	Homo sapiens	PIK3C3		R-HSA-9687435
R-HSA-74752	Signaling by Insulin receptor	1	97	0.006422139830508475	0.3073583256108674	0.3073583256108674	1	34	0.002464839785413948	9606	Homo sapiens	PIK3C3		R-HSA-109699
R-HSA-5689603	UCH proteinases	1	98	0.006488347457627119	0.3099842336971803	0.3099842336971803	2	11	7.974481658692185E-4	9606	Homo sapiens	PSMD2		R-HSA-5665854;R-HSA-5665871
R-HSA-5619084	ABC transporter disorders	1	99	0.006554555084745763	0.3126003605755896	0.3126003605755896	1	22	0.001594896331738437	9606	Homo sapiens	PSMD2		R-HSA-8866858
R-HSA-4086400	PCP/CE pathway	1	99	0.006554555084745763	0.3126003605755896	0.3126003605755896	1	24	0.0017398869073510222	9606	Homo sapiens	PSMD2		R-HSA-4608855
R-HSA-9013423	RAC3 GTPase cycle	1	100	0.0066207627118644065	0.31520674203175847	0.31520674203175847	1	6	4.3497172683775554E-4	9606	Homo sapiens	TAOK3		R-HSA-9018808
R-HSA-5668541	TNFR2 non-canonical NF-kB pathway	1	104	0.006885593220338983	0.32553552485733517	0.32553552485733517	3	43	0.0031172973756705812	9606	Homo sapiens	PSMD2		R-HSA-5607731;R-HSA-5668481;R-HSA-5668520
R-HSA-8939236	RUNX1 regulates transcription of genes involved in differentiation of HSCs	1	106	0.007018008474576272	0.3306423647578173	0.3306423647578173	1	15	0.001087429317094389	9606	Homo sapiens	PSMD2		R-HSA-8957265
R-HSA-422356	Regulation of insulin secretion	1	106	0.007018008474576272	0.3306423647578173	0.3306423647578173	1	34	0.002464839785413948	9606	Homo sapiens	PRKAR2A		R-HSA-381707
R-HSA-5687128	MAPK6/MAPK4 signaling	1	106	0.007018008474576272	0.3306423647578173	0.3306423647578173	1	40	0.0028998115122517037	9606	Homo sapiens	PSMD2		R-HSA-5687112
R-HSA-168138	Toll Like Receptor 9 (TLR9) Cascade	1	107	0.0070842161016949155	0.33318151951514396	0.33318151951514396	1	68	0.004929679570827896	9606	Homo sapiens	PIK3C3		R-HSA-188002
R-HSA-983168	Antigen processing: Ubiquitination & Proteasome degradation	2	315	0.02085540254237288	0.3340182228480286	0.3340182228480286	5	9	6.524575902566333E-4	9606	Homo sapiens	PSMD2;LMO7		R-HSA-983150;R-HSA-983147;R-HSA-983157;R-HSA-983156;R-HSA-983140
R-HSA-983170	Antigen Presentation: Folding, assembly and peptide loading of class I MHC	1	108	0.007150423728813559	0.3357112105454342	0.3357112105454342	1	16	0.0011599246049006815	9606	Homo sapiens	PIK3C3		R-HSA-983426
R-HSA-8957275	Post-translational protein phosphorylation	1	109	0.007216631355932203	0.3382314724935528	0.3382314724935528	1	1	7.24952878062926E-5	9606	Homo sapiens	LAMC1		R-HSA-8952289
R-HSA-9020702	Interleukin-1 signaling	1	110	0.007282838983050847	0.3407423398798297	0.3407423398798297	1	47	0.003407278526895752	9606	Homo sapiens	PSMD2		R-HSA-209061
R-HSA-193704	p75 NTR receptor-mediated signalling	1	110	0.007282838983050847	0.3407423398798297	0.3407423398798297	1	50	0.0036247643903146295	9606	Homo sapiens	ADAM17		R-HSA-193679
R-HSA-1257604	PIP3 activates AKT signaling	2	321	0.021252648305084745	0.34230109157561395	0.34230109157561395	2	86	0.0062345947513411624	9606	Homo sapiens	PSMD2;AKT1S1		R-HSA-8850992;R-HSA-200143
R-HSA-162582	Signal Transduction	13	3013	0.1994835805084746	0.34364142265205266	0.34364142265205266	61	2465	0.17870088444251123	9606	Homo sapiens	ADAM17;ADCY9;TAOK3;PRKAR2A;DGKA;PSMD2;ITGA2;AKT1S1;PIK3C3;LAMC1;PRKAB1		R-HSA-109699;R-HSA-392064;R-HSA-426240;R-HSA-380930;R-HSA-1251992;R-HSA-392206;R-HSA-193679;R-HSA-9013145;R-HSA-380949;R-HSA-4608855;R-HSA-177946;R-HSA-3640874;R-HSA-5687112;R-HSA-9014294;R-HSA-163617;R-HSA-8951727;R-HSA-170666;R-HSA-5610749;R-HSA-4641260;R-HSA-5672828;R-HSA-170671;R-HSA-4641256;R-HSA-5672824;R-HSA-9604642;R-HSA-170674;R-HSA-9018808;R-HSA-170672;R-HSA-5610727;R-HSA-8877620;R-HSA-…
R-HSA-2408557	Selenocysteine synthesis	1	112	0.007415254237288136	0.34573602842816586	0.34573602842816586	1	7	5.074670146440482E-4	9606	Homo sapiens	SARS1		R-HSA-2408526
R-HSA-3371453	Regulation of HSF1-mediated heat shock response	1	113	0.00748146186440678	0.34821891801217564	0.34821891801217564	5	14	0.0010149340292880964	9606	Homo sapiens	HSPA4L		R-HSA-5251955;R-HSA-5251942;R-HSA-5251959;R-HSA-5252041;R-HSA-5252079
R-HSA-388396	GPCR downstream signalling	4	792	0.0524364406779661	0.35015374480038197	0.35015374480038197	17	173	0.012541684790488618	9606	Homo sapiens	ADCY9;PRKAR2A;DGKA		R-HSA-163617;R-HSA-392129;R-HSA-392064;R-HSA-426240;R-HSA-8951727;R-HSA-170666;R-HSA-392206;R-HSA-170671;R-HSA-170674;R-HSA-170672;R-HSA-111925;R-HSA-170676;R-HSA-170677;R-HSA-111930;R-HSA-170686;R-HSA-9668558;R-HSA-170685
R-HSA-68867	Assembly of the pre-replicative complex	1	114	0.007547669491525424	0.35069254987912435	0.35069254987912435	1	23	0.0016673916195447296	9606	Homo sapiens	PSMD2		R-HSA-68825
R-HSA-8957322	Metabolism of steroids	2	331	0.021914724576271187	0.35603779459813334	0.35603779459813334	4	245	0.017761345512541684	9606	Homo sapiens	FDXR;HSD17B12		R-HSA-193064;R-HSA-193065;R-HSA-193054;R-HSA-193101
R-HSA-8878159	Transcriptional regulation by RUNX3	1	118	0.0078125	0.36049517643490225	0.36049517643490225	1	47	0.003407278526895752	9606	Homo sapiens	PSMD2		R-HSA-8952408
R-HSA-5607764	CLEC7A (Dectin-1) signaling	1	120	0.007944915254237288	0.36534181914974473	0.36534181914974473	2	45	0.0032622879512831664	9606	Homo sapiens	PSMD2		R-HSA-5607731;R-HSA-5607724
R-HSA-1852241	Organelle biogenesis and maintenance	2	338	0.022378177966101694	0.36559707743258674	0.36559707743258674	9	86	0.0062345947513411624	9606	Homo sapiens	ASAP1;PRKAB1		R-HSA-5623525;R-HSA-5623524;R-HSA-5623527;R-HSA-5620918;R-HSA-5623521;R-HSA-5623519;R-HSA-1592244;R-HSA-5623513;R-HSA-5620921
R-HSA-382556	ABC-family proteins mediated transport	1	122	0.008077330508474576	0.3701523700146696	0.3701523700146696	1	27	0.0019573727707699	9606	Homo sapiens	PSMD2		R-HSA-8866553
R-HSA-212436	Generic Transcription Pathway	7	1555	0.10295286016949153	0.371214753650551	0.371214753650551	24	830	0.06017108887922285	9606	Homo sapiens	TIGAR;TP53I3;PSMD2;CHP1;PRKAB1		R-HSA-9007465;R-HSA-9007464;R-HSA-6799462;R-HSA-9007467;R-HSA-8953452;R-HSA-9008110;R-HSA-6799466;R-HSA-6799722;R-HSA-9007462;R-HSA-8952408;R-HSA-5631941;R-HSA-5628901;R-HSA-8939801;R-HSA-9008475;R-HSA-6799441;R-HSA-5628899;R-HSA-8957265;R-HSA-6805470;R-HSA-380927;R-HSA-9007283;R-HSA-9009362;R-HSA-8953556;R-HSA-5628905;R-HSA-9007447
R-HSA-2219528	PI3K/AKT Signaling in Cancer	1	124	0.008209745762711865	0.3749270930331996	0.3749270930331996	1	21	0.0015224010439321444	9606	Homo sapiens	AKT1S1		R-HSA-2399977
R-HSA-202424	Downstream TCR signaling	1	124	0.008209745762711865	0.3749270930331996	0.3749270930331996	1	24	0.0017398869073510222	9606	Homo sapiens	PSMD2		R-HSA-5607724
R-HSA-381426	Regulation of Insulin-like Growth Factor (IGF) transport and uptake by Insulin-like Growth Factor Binding Proteins (IGFBPs)	1	127	0.008408368644067797	0.3820225731934398	0.3820225731934398	1	14	0.0010149340292880964	9606	Homo sapiens	LAMC1		R-HSA-8952289
R-HSA-2980736	Peptide hormone metabolism	1	127	0.008408368644067797	0.3820225731934398	0.3820225731934398	1	63	0.004567203131796433	9606	Homo sapiens	CES2		R-HSA-9619024
R-HSA-1592230	Mitochondrial biogenesis	1	128	0.00847457627118644	0.3843701020772551	0.3843701020772551	1	36	0.0026098303610265334	9606	Homo sapiens	PRKAB1		R-HSA-1592244
R-HSA-69239	Synthesis of DNA	1	132	0.008739406779661016	0.3936729206248545	0.3936729206248545	2	27	0.0019573727707699	9606	Homo sapiens	PSMD2		R-HSA-68948;R-HSA-69016
R-HSA-69002	DNA Replication Pre-Initiation	1	132	0.008739406779661016	0.3936729206248545	0.3936729206248545	1	32	0.002319849209801363	9606	Homo sapiens	PSMD2		R-HSA-68825
R-HSA-212165	Epigenetic regulation of gene expression	1	139	0.009202860169491525	0.40962165306469767	0.40962165306469767	1	34	0.002464839785413948	9606	Homo sapiens	CHP1		R-HSA-427383
R-HSA-8878166	Transcriptional regulation by RUNX2	1	147	0.009732521186440678	0.42734447919276963	0.42734447919276963	4	84	0.006089604175728578	9606	Homo sapiens	PSMD2		R-HSA-8939801;R-HSA-9008475;R-HSA-9008110;R-HSA-9009362
R-HSA-202403	TCR signaling	1	147	0.009732521186440678	0.42734447919276963	0.42734447919276963	1	52	0.0037697549659272147	9606	Homo sapiens	PSMD2		R-HSA-5607724
R-HSA-69206	G1/S Transition	1	150	0.00993114406779661	0.4338548863215699	0.4338548863215699	1	61	0.004422212556183848	9606	Homo sapiens	PSMD2		R-HSA-187574
R-HSA-162909	Host Interactions of HIV factors	1	151	0.009997351694915254	0.4360088198746518	0.4360088198746518	2	54	0.0039147455415398	9606	Homo sapiens	PSMD2		R-HSA-180603;R-HSA-180573
R-HSA-69481	G2/M Checkpoints	1	153	0.010129766949152543	0.44029256191949495	0.44029256191949495	1	24	0.0017398869073510222	9606	Homo sapiens	PSMD2		R-HSA-8852354
R-HSA-73887	Death Receptor Signalling	1	159	0.010527012711864406	0.4529529026251311	0.4529529026251311	2	93	0.006742061765985211	9606	Homo sapiens	ADAM17		R-HSA-3371385;R-HSA-193679
R-HSA-73857	RNA Polymerase II Transcription	7	1697	0.11235434322033898	0.46209085494763336	0.46209085494763336	24	891	0.0645933014354067	9606	Homo sapiens	TIGAR;TP53I3;PSMD2;CHP1;PRKAB1		R-HSA-9007465;R-HSA-9007464;R-HSA-6799462;R-HSA-9007467;R-HSA-8953452;R-HSA-9008110;R-HSA-6799466;R-HSA-6799722;R-HSA-9007462;R-HSA-8952408;R-HSA-5631941;R-HSA-5628901;R-HSA-8939801;R-HSA-9008475;R-HSA-6799441;R-HSA-5628899;R-HSA-8957265;R-HSA-6805470;R-HSA-380927;R-HSA-9007283;R-HSA-9009362;R-HSA-8953556;R-HSA-5628905;R-HSA-9007447
R-HSA-199991	Membrane Trafficking	3	668	0.04422669491525424	0.4645454418070769	0.4645454418070769	10	219	0.015876468029578077	9606	Homo sapiens	SYNJ1;PRKAB1		R-HSA-8868661;R-HSA-8868660;R-HSA-8868659;R-HSA-8868658;R-HSA-8869438;R-HSA-8868651;R-HSA-1454699;R-HSA-8871194;R-HSA-8871193;R-HSA-8868648
R-HSA-3858494	Beta-catenin independent WNT signaling	1	166	0.010990466101694915	0.4673680004781917	0.4673680004781917	1	51	0.0036972596781209223	9606	Homo sapiens	PSMD2		R-HSA-4608855
R-HSA-425393	Transport of inorganic cations/anions and amino acids/oligopeptides	1	167	0.01105667372881356	0.46939659777972	0.46939659777972	1	75	0.005437146585471945	9606	Homo sapiens	SLC12A4		R-HSA-426155
R-HSA-2142753	Arachidonic acid metabolism	1	168	0.011122881355932203	0.47141760394768406	0.47141760394768406	4	77	0.005582137161084529	9606	Homo sapiens	GPX1		R-HSA-2161959;R-HSA-2161946;R-HSA-2161791;R-HSA-2161999
R-HSA-446652	Interleukin-1 family signaling	1	168	0.011122881355932203	0.47141760394768406	0.47141760394768406	1	80	0.005799623024503407	9606	Homo sapiens	PSMD2		R-HSA-209061
R-HSA-69306	DNA Replication	1	169	0.011189088983050847	0.4734310468831706	0.4734310468831706	3	58	0.00420472669276497	9606	Homo sapiens	PSMD2		R-HSA-68948;R-HSA-68825;R-HSA-69016
R-HSA-2187338	Visual phototransduction	1	169	0.011189088983050847	0.4734310468831706	0.4734310468831706	2	92	0.006669566478178918	9606	Homo sapiens	NCS1		R-HSA-74885;R-HSA-2586748
R-HSA-6807070	PTEN Regulation	1	171	0.011321504237288135	0.4774353541579561	0.4774353541579561	1	56	0.0040597361171523854	9606	Homo sapiens	PSMD2		R-HSA-8850992
R-HSA-5668914	Diseases of metabolism	2	425	0.02813824152542373	0.47910052821389515	0.47910052821389515	2	195	0.014136581122227055	9606	Homo sapiens	FDXR;GCLM		R-HSA-5580269;R-HSA-5602892
R-HSA-418594	G alpha (i) signalling events	2	426	0.028204449152542374	0.4803370789377278	0.4803370789377278	14	74	0.0053646512976656515	9606	Homo sapiens	ADCY9;PRKAR2A		R-HSA-392129;R-HSA-8951727;R-HSA-170666;R-HSA-392206;R-HSA-170671;R-HSA-170674;R-HSA-170672;R-HSA-111925;R-HSA-170676;R-HSA-170677;R-HSA-111930;R-HSA-170686;R-HSA-9668558;R-HSA-170685
R-HSA-1236974	ER-Phagosome pathway	1	173	0.011453919491525424	0.48140974080533017	0.48140974080533017	1	10	7.249528780629259E-4	9606	Homo sapiens	PSMD2		R-HSA-1236935
R-HSA-453279	Mitotic G1 phase and G1/S transition	1	174	0.011520127118644068	0.4833857825829584	0.4833857825829584	1	101	0.007322024068435551	9606	Homo sapiens	PSMD2		R-HSA-187574
R-HSA-2871837	FCERI mediated NF-kB activation	1	175	0.011586334745762712	0.48535442643253635	0.48535442643253635	1	19	0.0013774104683195593	9606	Homo sapiens	PSMD2		R-HSA-5607724
R-HSA-8978868	Fatty acid metabolism	2	431	0.028535487288135594	0.4864937963947542	0.4864937963947542	5	217	0.01573147745396549	9606	Homo sapiens	GPX1;HSD17B12		R-HSA-2161959;R-HSA-548818;R-HSA-2161946;R-HSA-2161791;R-HSA-2161999
R-HSA-5633007	Regulation of TP53 Activity	1	178	0.011784957627118644	0.49121624195906477	0.49121624195906477	1	98	0.007104538205016674	9606	Homo sapiens	PRKAB1		R-HSA-6805470
R-HSA-69242	S Phase	1	179	0.011851165254237288	0.49315556515283565	0.49315556515283565	4	55	0.003987240829346092	9606	Homo sapiens	PSMD2		R-HSA-75825;R-HSA-187574;R-HSA-68948;R-HSA-69016
R-HSA-2408522	Selenoamino acid metabolism	1	180	0.011917372881355932	0.49508762545826035	0.49508762545826035	1	33	0.0023923444976076554	9606	Homo sapiens	SARS1		R-HSA-2408526
R-HSA-382551	Transport of small molecules	4	965	0.06389036016949153	0.49809106983608653	0.49809106983608653	6	443	0.03211541249818762	9606	Homo sapiens	SLC12A4;ADCY9;PRKAR2A;PSMD2		R-HSA-163617;R-HSA-111925;R-HSA-8951727;R-HSA-164377;R-HSA-426155;R-HSA-8866553
R-HSA-1630316	Glycosaminoglycan metabolism	1	182	0.012049788135593221	0.4989300641717652	0.4989300641717652	2	88	0.006379585326953748	9606	Homo sapiens	CHP1		R-HSA-2160884;R-HSA-2160892
R-HSA-9010553	Regulation of expression of SLITs and ROBOs	1	183	0.012115995762711865	0.5008404957228136	0.5008404957228136	1	20	0.0014499057561258518	9606	Homo sapiens	PSMD2		R-HSA-9011313
R-HSA-211897	Cytochrome P450 - arranged by substrate type	1	186	0.012314618644067797	0.5065289559989209	0.5065289559989209	1	61	0.004422212556183848	9606	Homo sapiens	FDXR		R-HSA-193101
R-HSA-983705	Signaling by the B Cell Receptor (BCR)	1	189	0.012513241525423728	0.5121537146945616	0.5121537146945616	1	44	0.003189792663476874	9606	Homo sapiens	PSMD2		R-HSA-1168640
R-HSA-168898	Toll-like Receptor Cascades	1	189	0.012513241525423728	0.5121537146945616	0.5121537146945616	1	185	0.01341162824416413	9606	Homo sapiens	PIK3C3		R-HSA-188002
R-HSA-9013149	RAC1 GTPase cycle	1	191	0.012645656779661016	0.5158685104231864	0.5158685104231864	1	6	4.3497172683775554E-4	9606	Homo sapiens	TAOK3		R-HSA-9013145
R-HSA-109581	Apoptosis	1	192	0.012711864406779662	0.5177154725664781	0.5177154725664781	1	141	0.010221835580687256	9606	Homo sapiens	PSMD2		R-HSA-211715
R-HSA-983231	Factors involved in megakaryocyte development and platelet production	1	194	0.01284427966101695	0.5213886533136209	0.5213886533136209	1	43	0.0031172973756705812	9606	Homo sapiens	PRKAR2A		R-HSA-992708
R-HSA-2467813	Separation of Sister Chromatids	1	195	0.012910487288135594	0.5232149228013083	0.5232149228013083	1	8	5.799623024503408E-4	9606	Homo sapiens	PSMD2		R-HSA-174202
R-HSA-1236975	Antigen processing-Cross presentation	1	195	0.012910487288135594	0.5232149228013083	0.5232149228013083	2	23	0.0016673916195447296	9606	Homo sapiens	PSMD2		R-HSA-1236935;R-HSA-1236970
R-HSA-5621481	C-type lectin receptors (CLRs)	1	203	0.013440148305084746	0.53758069954644	0.53758069954644	2	68	0.004929679570827896	9606	Homo sapiens	PSMD2		R-HSA-5607731;R-HSA-5607724
R-HSA-375276	Peptide ligand-binding receptors	1	203	0.013440148305084746	0.53758069954644	0.53758069954644	1	77	0.005582137161084529	9606	Homo sapiens	PSMD2		R-HSA-8877620
R-HSA-5689880	Ub-specific processing proteases	1	206	0.013638771186440678	0.5428574988555428	0.5428574988555428	1	40	0.0028998115122517037	9606	Homo sapiens	PSMD2		R-HSA-5689539
R-HSA-5617833	Cilium Assembly	1	210	0.013903601694915254	0.5498013010886735	0.5498013010886735	8	50	0.0036247643903146295	9606	Homo sapiens	ASAP1		R-HSA-5623525;R-HSA-5623524;R-HSA-5623527;R-HSA-5620918;R-HSA-5623521;R-HSA-5623519;R-HSA-5623513;R-HSA-5620921
R-HSA-69275	G2/M Transition	1	212	0.014036016949152543	0.5532342376849422	0.5532342376849422	3	78	0.005654632448890822	9606	Homo sapiens	PSMD2		R-HSA-8854071;R-HSA-8852354;R-HSA-8854044
R-HSA-453274	Mitotic G2-G2/M phases	1	214	0.014168432203389831	0.5566414526420467	0.5566414526420467	3	80	0.005799623024503407	9606	Homo sapiens	PSMD2		R-HSA-8854071;R-HSA-8852354;R-HSA-8854044
R-HSA-201681	TCF dependent signaling in response to WNT	1	216	0.014300847457627119	0.5600231352659633	0.5600231352659633	4	71	0.005147165434246774	9606	Homo sapiens	PSMD2		R-HSA-1504193;R-HSA-4641260;R-HSA-3640874;R-HSA-4641256
R-HSA-74160	Gene expression (Transcription)	7	1860	0.12314618644067797	0.5632025450925803	0.5632025450925803	26	1006	0.07293025953313034	9606	Homo sapiens	TIGAR;TP53I3;PSMD2;CHP1;PRKAB1		R-HSA-6799462;R-HSA-6799466;R-HSA-6799722;R-HSA-8952408;R-HSA-5631941;R-HSA-8939801;R-HSA-9008475;R-HSA-8957265;R-HSA-9009362;R-HSA-8953556;R-HSA-9007447;R-HSA-9007465;R-HSA-9007464;R-HSA-9007467;R-HSA-8953452;R-HSA-9008110;R-HSA-74986;R-HSA-9007462;R-HSA-5628901;R-HSA-427383;R-HSA-6799441;R-HSA-5628899;R-HSA-6805470;R-HSA-380927;R-HSA-9007283;R-HSA-5628905
R-HSA-9705671	SARS-CoV-2 activates/modulates innate and adaptive immune responses	1	226	0.01496292372881356	0.5765550938709612	0.5765550938709612	2	47	0.003407278526895752	9606	Homo sapiens	PIK3C3		R-HSA-9755359;R-HSA-983426
R-HSA-2454202	Fc epsilon receptor (FCERI) signaling	1	235	0.015558792372881356	0.590911080394037	0.590911080394037	1	65	0.0047121937074090185	9606	Homo sapiens	PSMD2		R-HSA-5607724
R-HSA-5357801	Programmed Cell Death	1	238	0.015757415254237288	0.5955893014025514	0.5955893014025514	1	197	0.01428157169783964	9606	Homo sapiens	PSMD2		R-HSA-211715
R-HSA-5653656	Vesicle-mediated transport	3	828	0.05481991525423729	0.6109795589952506	0.6109795589952506	10	252	0.01826881252718573	9606	Homo sapiens	SYNJ1;PRKAB1		R-HSA-8868661;R-HSA-8868660;R-HSA-8868659;R-HSA-8868658;R-HSA-8869438;R-HSA-8868651;R-HSA-1454699;R-HSA-8871194;R-HSA-8871193;R-HSA-8868648
R-HSA-68882	Mitotic Anaphase	1	249	0.016485699152542374	0.6122973998980807	0.6122973998980807	1	32	0.002319849209801363	9606	Homo sapiens	PSMD2		R-HSA-174202
R-HSA-2555396	Mitotic Metaphase and Anaphase	1	250	0.016551906779661018	0.6137822498040189	0.6137822498040189	1	33	0.0023923444976076554	9606	Homo sapiens	PSMD2		R-HSA-174202
R-HSA-15869	Metabolism of nucleotides	1	256	0.01694915254237288	0.6225747342745019	0.6225747342745019	3	141	0.010221835580687256	9606	Homo sapiens	GLRX		R-HSA-8866405;R-HSA-111746;R-HSA-111742
R-HSA-196849	Metabolism of water-soluble vitamins and cofactors	1	258	0.01708156779661017	0.6254616283818597	0.6254616283818597	1	142	0.010294330868493549	9606	Homo sapiens	PANK2		R-HSA-196857
R-HSA-8878171	Transcriptional regulation by RUNX1	1	261	0.0172801906779661	0.62975133753135	0.62975133753135	1	132	0.009569377990430622	9606	Homo sapiens	PSMD2		R-HSA-8957265
R-HSA-162906	HIV Infection	1	263	0.01741260593220339	0.6325842887944401	0.6325842887944401	2	160	0.011599246049006815	9606	Homo sapiens	PSMD2		R-HSA-180603;R-HSA-180573
R-HSA-69620	Cell Cycle Checkpoints	1	279	0.018471927966101694	0.6544942100033566	0.6544942100033566	3	56	0.0040597361171523854	9606	Homo sapiens	PSMD2		R-HSA-69600;R-HSA-8852354;R-HSA-264458
R-HSA-5619115	Disorders of transmembrane transporters	1	280	0.018538135593220338	0.6558201243520547	0.6558201243520547	1	87	0.006307090039147456	9606	Homo sapiens	PSMD2		R-HSA-8866858
R-HSA-5688426	Deubiquitination	1	289	0.019134004237288137	0.6675305881400477	0.6675305881400477	3	77	0.005582137161084529	9606	Homo sapiens	PSMD2		R-HSA-5689539;R-HSA-5665854;R-HSA-5665871
R-HSA-1643685	Disease	9	2651	0.1755164194915254	0.6897114538293552	0.6897114538293552	28	1708	0.12382195157314775	9606	Homo sapiens	ADAM17;ADCY9;PRKAR2A;PSMD2;AKT1S1;FDXR;PIK3C3;LMO7;GCLM		R-HSA-9700181;R-HSA-392129;R-HSA-9700179;R-HSA-9662747;R-HSA-9698265;R-HSA-9755359;R-HSA-983426;R-HSA-2399977;R-HSA-2666278;R-HSA-9662786;R-HSA-2220976;R-HSA-5387392;R-HSA-9687435;R-HSA-5602892;R-HSA-180573;R-HSA-163617;R-HSA-9662837;R-HSA-9662773;R-HSA-8951727;R-HSA-2730752;R-HSA-8866858;R-HSA-9662818;R-HSA-2220944;R-HSA-9662823;R-HSA-111925;R-HSA-5580269;R-HSA-180603;R-HSA-111930
R-HSA-9705683	SARS-CoV-2-host interactions	1	314	0.020789194915254237	0.6980443005060901	0.6980443005060901	2	67	0.004857184283021603	9606	Homo sapiens	PIK3C3		R-HSA-9755359;R-HSA-983426
R-HSA-5673001	RAF/MAP kinase cascade	1	322	0.02131885593220339	0.7072144787222495	0.7072144787222495	1	75	0.005437146585471945	9606	Homo sapiens	PSMD2		R-HSA-5658430
R-HSA-195258	RHO GTPase Effectors	1	326	0.021583686440677968	0.711696403363998	0.711696403363998	1	113	0.008191967522111062	9606	Homo sapiens	PIK3C3		R-HSA-6798174
R-HSA-1266738	Developmental Biology	4	1263	0.08362023305084745	0.71247415680486	0.71247415680486	6	556	0.04030738002029868	9606	Homo sapiens	PRKAR2A;ITGA2;PSMD2;LAMC1		R-HSA-9619666;R-HSA-443778;R-HSA-445088;R-HSA-9619668;R-HSA-9011313;R-HSA-9010641
R-HSA-5684996	MAPK1/MAPK3 signaling	1	329	0.0217823093220339	0.7150135456176643	0.7150135456176643	1	82	0.005944613600115992	9606	Homo sapiens	PSMD2		R-HSA-5658430
R-HSA-195721	Signaling by WNT	1	332	0.02198093220338983	0.7182931837441582	0.7182931837441582	6	157	0.011381760185587937	9606	Homo sapiens	PSMD2		R-HSA-4608855;R-HSA-1504193;R-HSA-4641260;R-HSA-2130282;R-HSA-3640874;R-HSA-4641256
R-HSA-5663205	Infectious disease	5	1574	0.10421080508474577	0.721414394225655	0.721414394225655	17	825	0.05980861244019139	9606	Homo sapiens	ADAM17;ADCY9;PRKAR2A;PSMD2;PIK3C3		R-HSA-163617;R-HSA-392129;R-HSA-9662837;R-HSA-9662773;R-HSA-8951727;R-HSA-9662747;R-HSA-9698265;R-HSA-9755359;R-HSA-983426;R-HSA-9662786;R-HSA-9662818;R-HSA-9662823;R-HSA-111925;R-HSA-9687435;R-HSA-180603;R-HSA-111930;R-HSA-180573
R-HSA-71291	Metabolism of amino acids and derivatives	2	666	0.04409427966101695	0.7223595757633211	0.7223595757633211	2	285	0.02066115702479339	9606	Homo sapiens	SARS1;PSMD2		R-HSA-353125;R-HSA-2408526
R-HSA-72766	Translation	1	339	0.022444385593220338	0.7258021546441212	0.7258021546441212	1	99	0.007177033492822967	9606	Homo sapiens	SARS1		R-HSA-379992
R-HSA-1280218	Adaptive Immune System	3	1012	0.0670021186440678	0.7442343300366272	0.7442343300366272	10	264	0.019138755980861243	9606	Homo sapiens	PSMD2;PIK3C3;LMO7		R-HSA-983150;R-HSA-1168640;R-HSA-983147;R-HSA-1236935;R-HSA-1236970;R-HSA-5607724;R-HSA-983157;R-HSA-983156;R-HSA-983140;R-HSA-983426
R-HSA-194315	Signaling by Rho GTPases	2	709	0.04694120762711865	0.7542719444293091	0.7542719444293091	4	203	0.014716543424677396	9606	Homo sapiens	TAOK3;PIK3C3		R-HSA-9013145;R-HSA-9018808;R-HSA-6798174;R-HSA-9014294
R-HSA-168249	Innate Immune System	4	1338	0.08858580508474577	0.7548654251138083	0.7548654251138083	9	710	0.05147165434246774	9606	Homo sapiens	PSMD2;SIRPA;PIK3C3		R-HSA-6798743;R-HSA-188002;R-HSA-210274;R-HSA-6800434;R-HSA-5607731;R-HSA-5607724;R-HSA-6798748;R-HSA-6798747;R-HSA-6800426
R-HSA-9716542	Signaling by Rho GTPases, Miro GTPases and RHOBTB3	2	725	0.04800052966101695	0.7653341010424326	0.7653341010424326	4	212	0.01536900101493403	9606	Homo sapiens	TAOK3;PIK3C3		R-HSA-9013145;R-HSA-9018808;R-HSA-6798174;R-HSA-9014294
R-HSA-5683057	MAPK family signaling cascades	1	380	0.025158898305084745	0.7659932344704856	0.7659932344704856	2	122	0.008844425112367696	9606	Homo sapiens	PSMD2		R-HSA-5658430;R-HSA-5687112
R-HSA-196854	Metabolism of vitamins and cofactors	1	382	0.025291313559322032	0.767798149121687	0.767798149121687	1	204	0.01478903871248369	9606	Homo sapiens	PANK2		R-HSA-196857
R-HSA-373076	Class A/1 (Rhodopsin-like receptors)	1	412	0.027277542372881356	0.793286074175035	0.793286074175035	1	160	0.011599246049006815	9606	Homo sapiens	PSMD2		R-HSA-8877620
R-HSA-68886	M Phase	1	416	0.02754237288135593	0.7964696621619488	0.7964696621619488	1	91	0.006597071190372626	9606	Homo sapiens	PSMD2		R-HSA-174202
R-HSA-9694516	SARS-CoV-2 Infection	1	420	0.027807203389830507	0.799605067057219	0.799605067057219	3	186	0.013484123531970421	9606	Homo sapiens	PIK3C3		R-HSA-9698265;R-HSA-9755359;R-HSA-983426
R-HSA-425407	SLC-mediated transmembrane transport	1	420	0.027807203389830507	0.799605067057219	0.799605067057219	1	191	0.013846599971001884	9606	Homo sapiens	SLC12A4		R-HSA-426155
R-HSA-71387	Metabolism of carbohydrates	1	456	0.030190677966101694	0.8257702965768386	0.8257702965768386	2	243	0.0176163549369291	9606	Homo sapiens	CHP1		R-HSA-2160884;R-HSA-2160892
R-HSA-9012999	RHO GTPase cycle	1	460	0.03045550847457627	0.8284615958041484	0.8284615958041484	3	91	0.006597071190372626	9606	Homo sapiens	TAOK3		R-HSA-9013145;R-HSA-9018808;R-HSA-9014294
R-HSA-9679506	SARS-CoV Infections	1	516	0.03416313559322034	0.8621155382273971	0.8621155382273971	4	329	0.023850949688270263	9606	Homo sapiens	PIK3C3		R-HSA-9687435;R-HSA-9698265;R-HSA-9755359;R-HSA-983426
R-HSA-69278	Cell Cycle, Mitotic	1	596	0.03945974576271186	0.8992169522933684	0.8992169522933684	13	352	0.025518341307814992	9606	Homo sapiens	PSMD2		R-HSA-8852354;R-HSA-174058;R-HSA-174255;R-HSA-8854071;R-HSA-75825;R-HSA-187574;R-HSA-68948;R-HSA-174202;R-HSA-69016;R-HSA-174203;R-HSA-8854044;R-HSA-174105;R-HSA-188191
R-HSA-500792	GPCR ligand binding	1	606	0.0401218220338983	0.9031011211079816	0.9031011211079816	1	187	0.013556618819776715	9606	Homo sapiens	PSMD2		R-HSA-8877620
R-HSA-449147	Signaling by Interleukins	1	645	0.042703919491525424	0.9168929237534399	0.9168929237534399	1	493	0.03574017688850225	9606	Homo sapiens	PSMD2		R-HSA-209061
R-HSA-1280215	Cytokine Signaling in Immune system	2	1094	0.0724311440677966	0.9249752932361951	0.9249752932361951	5	710	0.05147165434246774	9606	Homo sapiens	ADAM17;PSMD2		R-HSA-209061;R-HSA-5607731;R-HSA-5668481;R-HSA-1168777;R-HSA-5668520
R-HSA-392499	Metabolism of proteins	5	2212	0.1464512711864407	0.934124433078151	0.934124433078151	17	810	0.058721183123097	9606	Homo sapiens	SARS1;PSMD2;LMO7;LAMC1;CES2		R-HSA-8956040;R-HSA-8956200;R-HSA-8955241;R-HSA-8952618;R-HSA-9619024;R-HSA-8956140;R-HSA-8952620;R-HSA-5665854;R-HSA-8952289;R-HSA-8932355;R-HSA-8956184;R-HSA-8955289;R-HSA-9755303;R-HSA-5689539;R-HSA-5665871;R-HSA-379992;R-HSA-9755306
R-HSA-1640170	Cell Cycle	1	734	0.04859639830508475	0.9415488450009232	0.9415488450009232	15	451	0.03269537480063796	9606	Homo sapiens	PSMD2		R-HSA-69600;R-HSA-8852354;R-HSA-174058;R-HSA-174255;R-HSA-264458;R-HSA-8854071;R-HSA-75825;R-HSA-187574;R-HSA-68948;R-HSA-174202;R-HSA-69016;R-HSA-174203;R-HSA-8854044;R-HSA-174105;R-HSA-188191
R-HSA-597592	Post-translational protein modification	3	1605	0.10626324152542373	0.9497711016469944	0.9497711016469944	15	538	0.039002464839785415	9606	Homo sapiens	PSMD2;LMO7;LAMC1		R-HSA-8956040;R-HSA-8956200;R-HSA-8955241;R-HSA-8952618;R-HSA-8956140;R-HSA-8952620;R-HSA-5665854;R-HSA-8952289;R-HSA-8932355;R-HSA-8956184;R-HSA-8955289;R-HSA-9755303;R-HSA-5689539;R-HSA-5665871;R-HSA-9755306
R-HSA-8953854	Metabolism of RNA	1	788	0.052171610169491525	0.9528378464908677	0.9528378464908677	1	187	0.013556618819776715	9606	Homo sapiens	PSMD2		R-HSA-450466
R-HSA-168256	Immune System	6	2691	0.1781647245762712	0.9546614374072808	0.9546614374072808	22	1625	0.11780484268522547	9606	Homo sapiens	ADAM17;PSMD2;SIRPA;PIK3C3;LMO7		R-HSA-188002;R-HSA-983150;R-HSA-210274;R-HSA-983147;R-HSA-5607731;R-HSA-209061;R-HSA-983140;R-HSA-6800426;R-HSA-983426;R-HSA-6798743;R-HSA-1168640;R-HSA-6800434;R-HSA-1236935;R-HSA-5668481;R-HSA-1236970;R-HSA-1168777;R-HSA-5607724;R-HSA-983157;R-HSA-6798748;R-HSA-983156;R-HSA-6798747;R-HSA-5668520
R-HSA-9709957	Sensory Perception	2	1262	0.08355402542372882	0.9571196404571056	0.9571196404571056	4	143	0.01036682615629984	9606	Homo sapiens	EPB41L1;NCS1		R-HSA-9663363;R-HSA-74885;R-HSA-9659380;R-HSA-2586748
