# Supplementary material for: Promitotic Action of Oenothera biennis on Senescent Human Dermal Fibroblasts
Source: Int J Mol Sci. 2022 Dec 2;23(23):15153. doi: 10.3390/ijms232315153 (PMC9735661; doi:10.3390/ijms232315153)
Supplement: Supplementary file 1 [file ijms-23-15153-s001.zip › Table S7 Reactome enrichment analysis of upregulated proteins in senescent NHDF cells after ObHEx treatment.csv]

Pathway identifier	Pathway name	#Entities found	#Entities total	Entities ratio	Entities pValue	Entities FDR	#Reactions found	#Reactions total	Reactions ratio	Species identifier	Species name	Submitted entities found	Mapped entities	Found reaction identifiers
R-HSA-69278	Cell Cycle, Mitotic	18	596	0.03945974576271186	1.1102230246251565E-16	2.375877272697835E-14	106	352	0.025518341307814992	9606	Homo sapiens	MCM7;NCAPG;SMC4;NCAPH;SMC2;DHFR;NUF2;MCM3;CDK1;MCM4;KNTC1;MCM5;NCAPD2;MCM6;MCM2		R-HSA-375302;R-HSA-8961934;R-HSA-8961920;R-HSA-2294574;R-HSA-2990882;R-HSA-2520883;R-HSA-2294580;R-HSA-8853405;R-HSA-174104;R-HSA-2294590;R-HSA-380455;R-HSA-187937;R-HSA-9018017;R-HSA-174122;R-HSA-174120;R-HSA-176942;R-HSA-8853419;R-HSA-187948;R-HSA-187949;R-HSA-2984220;R-HSA-2429719;R-HSA-68914;R-HSA-68917;R-HSA-68916;R-HSA-187959;R-HSA-68919;R-HSA-2172183;R-HSA-174132;R-HSA-68918;R-HSA-170044;R…
R-HSA-1640170	Cell Cycle	18	734	0.04859639830508475	2.220446049250313E-16	2.375877272697835E-14	114	451	0.03269537480063796	9606	Homo sapiens	MCM7;NCAPG;SMC4;NCAPH;SMC2;DHFR;NUF2;MCM3;CDK1;MCM4;KNTC1;MCM5;NCAPD2;MCM6;MCM2		R-HSA-375302;R-HSA-8961934;R-HSA-8961920;R-HSA-2294574;R-HSA-2990882;R-HSA-2520883;R-HSA-2294580;R-HSA-163096;R-HSA-8853405;R-HSA-174104;R-HSA-2294590;R-HSA-380455;R-HSA-187937;R-HSA-9018017;R-HSA-174122;R-HSA-174120;R-HSA-176942;R-HSA-8853419;R-HSA-187948;R-HSA-187949;R-HSA-2984220;R-HSA-2429719;R-HSA-68914;R-HSA-68917;R-HSA-68916;R-HSA-187959;R-HSA-68919;R-HSA-2172183;R-HSA-174132;R-HSA-68918;R…
R-HSA-69206	G1/S Transition	11	150	0.00993114406779661	6.5503158452884236E-15	4.650724250154781E-13	20	61	0.004422212556183848	9606	Homo sapiens	DHFR;MCM7;MCM3;CDK1;MCM4;MCM5;MCM6;MCM2		R-HSA-188386;R-HSA-68960;R-HSA-187552;R-HSA-187520;R-HSA-188390;R-HSA-8961934;R-HSA-113638;R-HSA-8961920;R-HSA-68940;R-HSA-8961863;R-HSA-68914;R-HSA-68917;R-HSA-187574;R-HSA-68916;R-HSA-187575;R-HSA-68919;R-HSA-68918;R-HSA-8961874;R-HSA-68954;R-HSA-188350
R-HSA-453279	Mitotic G1 phase and G1/S transition	11	174	0.011520127118644068	3.2529534621517087E-14	1.7240653349404056E-12	22	101	0.007322024068435551	9606	Homo sapiens	DHFR;MCM7;MCM3;CDK1;MCM4;MCM5;MCM6;MCM2		R-HSA-188386;R-HSA-68960;R-HSA-187552;R-HSA-187520;R-HSA-188390;R-HSA-8961934;R-HSA-113638;R-HSA-9018017;R-HSA-8961920;R-HSA-68940;R-HSA-8961863;R-HSA-68914;R-HSA-68917;R-HSA-187574;R-HSA-68916;R-HSA-187575;R-HSA-68919;R-HSA-68918;R-HSA-8961874;R-HSA-68954;R-HSA-188350;R-HSA-8964567
R-HSA-176974	Unwinding of DNA	6	12	7.944915254237289E-4	1.8207657603852567E-13	6.3726801613483985E-12	2	4	2.899811512251704E-4	9606	Homo sapiens	MCM7;MCM3;MCM4;MCM5;MCM6;MCM2		R-HSA-176942;R-HSA-169468
R-HSA-2514853	Condensation of Prometaphase Chromosomes	6	15	9.93114406779661E-4	6.9155792203901E-13	2.07467376611703E-11	4	4	2.899811512251704E-4	9606	Homo sapiens	CDK1;NCAPG;NCAPD2;SMC4;NCAPH;SMC2		R-HSA-2514854;R-HSA-2529015;R-HSA-2520883;R-HSA-2529020
R-HSA-68962	Activation of the pre-replicative complex	6	36	0.0023834745762711866	1.2826673057020344E-10	2.7804630819971976E-9	8	9	6.524575902566333E-4	9606	Homo sapiens	MCM7;MCM3;MCM4;MCM5;MCM6;MCM2		R-HSA-68960;R-HSA-68914;R-HSA-68917;R-HSA-68916;R-HSA-68919;R-HSA-68918;R-HSA-68954;R-HSA-68940
R-HSA-68949	Orc1 removal from chromatin	7	73	0.004833156779661017	1.4634016221037882E-10	2.7804630819971976E-9	1	4	2.899811512251704E-4	9606	Homo sapiens	MCM7;MCM3;CDK1;MCM4;MCM5;MCM6;MCM2		R-HSA-68944
R-HSA-69190	DNA strand elongation	6	38	0.0025158898305084744	1.7691603737546302E-10	2.8306565980074083E-9	2	15	0.001087429317094389	9606	Homo sapiens	MCM7;MCM3;MCM4;MCM5;MCM6;MCM2		R-HSA-176942;R-HSA-169468
R-HSA-176187	Activation of ATR in response to replication stress	6	39	0.0025820974576271187	2.0646018228376306E-10	3.096902734256446E-9	2	9	6.524575902566333E-4	9606	Homo sapiens	MCM7;MCM3;MCM4;MCM5;MCM6;MCM2		R-HSA-176298;R-HSA-176318
R-HSA-69052	Switching of origins to a post-replicative state	7	94	0.006223516949152542	8.342176949227564E-10	1.0844830033995834E-8	3	10	7.249528780629259E-4	9606	Homo sapiens	MCM7;MCM3;CDK1;MCM4;MCM5;MCM6;MCM2		R-HSA-68944;R-HSA-69019;R-HSA-69005
R-HSA-69620	Cell Cycle Checkpoints	9	279	0.018471927966101694	3.4931790793280015E-9	4.191814895193602E-8	8	56	0.0040597361171523854	9606	Homo sapiens	MCM7;NUF2;MCM3;CDK1;MCM4;KNTC1;MCM5;MCM6;MCM2		R-HSA-141409;R-HSA-170070;R-HSA-170055;R-HSA-141431;R-HSA-176298;R-HSA-176318;R-HSA-141422;R-HSA-141439
R-HSA-69239	Synthesis of DNA	7	132	0.008739406779661016	8.518478034069688E-9	8.588901589945408E-8	5	27	0.0019573727707699	9606	Homo sapiens	MCM7;MCM3;CDK1;MCM4;MCM5;MCM6;MCM2		R-HSA-68944;R-HSA-69019;R-HSA-176942;R-HSA-69005;R-HSA-169468
R-HSA-68877	Mitotic Prometaphase	8	211	0.013969809322033898	8.588901589945408E-9	8.588901589945408E-8	13	20	0.0014499057561258518	9606	Homo sapiens	NUF2;CDK1;NCAPG;KNTC1;NCAPD2;SMC4;NCAPH;SMC2		R-HSA-2514854;R-HSA-2468293;R-HSA-9648114;R-HSA-375302;R-HSA-1638803;R-HSA-2529015;R-HSA-2484822;R-HSA-2520883;R-HSA-380316;R-HSA-380508;R-HSA-2468287;R-HSA-2529020;R-HSA-1638821
R-HSA-69481	G2/M Checkpoints	7	153	0.010129766949152543	2.3250827485554737E-8	2.3250827485554737E-7	4	24	0.0017398869073510222	9606	Homo sapiens	MCM7;MCM3;CDK1;MCM4;MCM5;MCM6;MCM2		R-HSA-170070;R-HSA-170055;R-HSA-176298;R-HSA-176318
R-HSA-69306	DNA Replication	7	169	0.011189088983050847	4.5612891241830766E-8	4.105160211764769E-7	21	58	0.00420472669276497	9606	Homo sapiens	MCM7;MCM3;CDK1;MCM4;MCM5;MCM6;MCM2		R-HSA-68960;R-HSA-176942;R-HSA-69005;R-HSA-68940;R-HSA-9749253;R-HSA-68944;R-HSA-9749350;R-HSA-9749286;R-HSA-9749351;R-HSA-68914;R-HSA-68917;R-HSA-68916;R-HSA-68919;R-HSA-68918;R-HSA-69019;R-HSA-68954;R-HSA-9749320;R-HSA-9757256;R-HSA-9757257;R-HSA-169468;R-HSA-9757258
R-HSA-69242	S Phase	7	179	0.011851165254237288	6.726288548364323E-8	6.053659693527891E-7	11	55	0.003987240829346092	9606	Homo sapiens	MCM7;MCM3;CDK1;MCM4;MCM5;MCM6;MCM2		R-HSA-68944;R-HSA-187552;R-HSA-187520;R-HSA-187574;R-HSA-187575;R-HSA-69019;R-HSA-176942;R-HSA-69005;R-HSA-169468;R-HSA-187948;R-HSA-187949
R-HSA-68867	Assembly of the pre-replicative complex	6	114	0.007547669491525424	1.157624870407048E-7	9.260998963256384E-7	8	23	0.0016673916195447296	9606	Homo sapiens	MCM7;MCM3;MCM4;MCM5;MCM6;MCM2		R-HSA-9749253;R-HSA-9749350;R-HSA-9749286;R-HSA-9749351;R-HSA-9749320;R-HSA-9757256;R-HSA-9757257;R-HSA-9757258
R-HSA-69002	DNA Replication Pre-Initiation	6	132	0.008739406779661016	2.71927930950433E-7	2.175423447603464E-6	16	32	0.002319849209801363	9606	Homo sapiens	MCM7;MCM3;MCM4;MCM5;MCM6;MCM2		R-HSA-68960;R-HSA-68940;R-HSA-9749253;R-HSA-9749350;R-HSA-9749286;R-HSA-9749351;R-HSA-68914;R-HSA-68917;R-HSA-68916;R-HSA-68919;R-HSA-68918;R-HSA-68954;R-HSA-9749320;R-HSA-9757256;R-HSA-9757257;R-HSA-9757258
R-HSA-68886	M Phase	8	416	0.02754237288135593	1.4801909912209865E-6	1.1841527929767892E-5	31	91	0.006597071190372626	9606	Homo sapiens	NUF2;CDK1;NCAPG;KNTC1;NCAPD2;SMC4;NCAPH;SMC2		R-HSA-2514854;R-HSA-2245218;R-HSA-375302;R-HSA-2288097;R-HSA-2467809;R-HSA-5195402;R-HSA-2467811;R-HSA-1638803;R-HSA-2294574;R-HSA-2990882;R-HSA-2529015;R-HSA-2520883;R-HSA-2294580;R-HSA-380316;R-HSA-380508;R-HSA-2468287;R-HSA-2529020;R-HSA-2172666;R-HSA-2294590;R-HSA-2468293;R-HSA-2430533;R-HSA-9648114;R-HSA-2294600;R-HSA-5244669;R-HSA-2984220;R-HSA-9624800;R-HSA-2429719;R-HSA-380278;R-HSA-24848…
R-HSA-69205	G1/S-Specific Transcription	4	43	0.0028469279661016947	1.9437037563907467E-6	1.3605926294735227E-5	4	28	0.0020298680585761927	9606	Homo sapiens	DHFR;CDK1		R-HSA-8961934;R-HSA-8961920;R-HSA-8961874;R-HSA-8961863
R-HSA-2299718	Condensation of Prophase Chromosomes	3	55	0.0036414194915254236	2.0107982303174676E-4	0.0014075587612222273	8	10	7.249528780629259E-4	9606	Homo sapiens	CDK1;SMC4;SMC2		R-HSA-2245218;R-HSA-2429719;R-HSA-2288097;R-HSA-2294580;R-HSA-2294600;R-HSA-2172666;R-HSA-2294574;R-HSA-2294590
R-HSA-1362300	Transcription of E2F targets under negative control by p107 (RBL1) and p130 (RBL2) in complex with HDAC1	2	20	0.0013241525423728813	7.947366694037727E-4	0.005563156685826409	2	8	5.799623024503408E-4	9606	Homo sapiens	CDK1		R-HSA-8961934;R-HSA-8964567
R-HSA-69273	Cyclin A/B1/B2 associated events during G2/M transition	2	32	0.00211864406779661	0.002003603070183324	0.014025221491283268	19	25	0.0018123821951573148	9606	Homo sapiens	CDK1		R-HSA-170087;R-HSA-170055;R-HSA-170116;R-HSA-4088024;R-HSA-170084;R-HSA-170088;R-HSA-170057;R-HSA-170153;R-HSA-170158;R-HSA-170126;R-HSA-170156;R-HSA-170131;R-HSA-170161;R-HSA-170070;R-HSA-170072;R-HSA-69754;R-HSA-69756;R-HSA-170076;R-HSA-170044
R-HSA-5626467	RHO GTPases activate IQGAPs	2	36	0.0023834745762711866	0.0025229088407198175	0.015137453044318905	5	5	3.6247643903146296E-4	9606	Homo sapiens	IQGAP3		R-HSA-5626549;R-HSA-5626469;R-HSA-5672304;R-HSA-5626507;R-HSA-5672329
R-HSA-2500257	Resolution of Sister Chromatid Cohesion	3	134	0.008871822033898306	0.0026066485274136575	0.015639891164481945	5	8	5.799623024503408E-4	9606	Homo sapiens	NUF2;CDK1;KNTC1		R-HSA-2468293;R-HSA-2484822;R-HSA-2468287;R-HSA-1638803;R-HSA-1638821
R-HSA-68875	Mitotic Prophase	3	135	0.00893802966101695	0.002661760954583259	0.015970565727499553	15	34	0.002464839785413948	9606	Homo sapiens	CDK1;SMC4;SMC2		R-HSA-2245218;R-HSA-2430533;R-HSA-2288097;R-HSA-5195402;R-HSA-2294600;R-HSA-5244669;R-HSA-2294574;R-HSA-2990882;R-HSA-2984220;R-HSA-2429719;R-HSA-380278;R-HSA-2172183;R-HSA-2294580;R-HSA-2172666;R-HSA-2294590
R-HSA-1538133	G0 and Early G1	2	38	0.0025158898305084744	0.002803861385880735	0.01682316831528441	2	27	0.0019573727707699	9606	Homo sapiens	CDK1		R-HSA-8961934;R-HSA-8964567
R-HSA-6804757	Regulation of TP53 Degradation	2	43	0.0028469279661016947	0.003567461808713368	0.020335211369315598	1	30	0.002174858634188778	9606	Homo sapiens	CDK1		R-HSA-6793661
R-HSA-6806003	Regulation of TP53 Expression and Degradation	2	46	0.0030455508474576272	0.0040670422738631196	0.020335211369315598	1	35	0.0025373350732202406	9606	Homo sapiens	CDK1		R-HSA-6793661
R-HSA-195258	RHO GTPase Effectors	4	326	0.021583686440677968	0.004286599421425397	0.021432997107126983	8	113	0.008191967522111062	9606	Homo sapiens	NUF2;KNTC1;IQGAP3		R-HSA-5626549;R-HSA-5626469;R-HSA-5672304;R-HSA-5666160;R-HSA-5666129;R-HSA-5626507;R-HSA-5672329;R-HSA-5666169
R-HSA-9013406	RHOQ GTPase cycle	2	63	0.004171080508474576	0.007465375341840108	0.03732687670920054	1	5	3.6247643903146296E-4	9606	Homo sapiens	IQGAP3		R-HSA-9018746
R-HSA-170145	Phosphorylation of proteins involved in the G2/M transition by Cyclin A:Cdc2 complexes	1	5	3.310381355932203E-4	0.010211387287375473	0.051056936436877365	2	2	1.449905756125852E-4	9606	Homo sapiens	CDK1		R-HSA-69754;R-HSA-69756
R-HSA-5579000	Defective CYP1B1 causes Glaucoma	1	5	3.310381355932203E-4	0.010211387287375473	0.051056936436877365	1	1	7.24952878062926E-5	9606	Homo sapiens	CYP1B1		R-HSA-5605147
R-HSA-9013106	RHOC GTPase cycle	2	79	0.005230402542372881	0.011502748631124993	0.05492331712131371	1	6	4.3497172683775554E-4	9606	Homo sapiens	IQGAP3		R-HSA-9013110
R-HSA-69200	Phosphorylation of proteins involved in G1/S transition by active Cyclin E:Cdk2 complexes	1	6	3.9724576271186443E-4	0.012241520689343144	0.05492331712131371	1	1	7.24952878062926E-5	9606	Homo sapiens	CDK1		R-HSA-188390
R-HSA-176408	Regulation of APC/C activators between G1/S and early anaphase	2	83	0.005495233050847458	0.012632823624325384	0.05492331712131371	4	14	0.0010149340292880964	9606	Homo sapiens	CDK1		R-HSA-188371;R-HSA-174122;R-HSA-174251;R-HSA-174079
R-HSA-68911	G2 Phase	1	7	4.634533898305085E-4	0.014267624184517547	0.05492331712131371	2	2	1.449905756125852E-4	9606	Homo sapiens	CDK1		R-HSA-187937;R-HSA-187959
R-HSA-69478	G2/M DNA replication checkpoint	1	7	4.634533898305085E-4	0.014267624184517547	0.05492331712131371	2	2	1.449905756125852E-4	9606	Homo sapiens	CDK1		R-HSA-170070;R-HSA-170055
R-HSA-68882	Mitotic Anaphase	3	249	0.016485699152542374	0.014273093692580563	0.05492331712131371	3	32	0.002319849209801363	9606	Homo sapiens	NUF2;CDK1;KNTC1		R-HSA-9624800;R-HSA-2467809;R-HSA-2467811
R-HSA-2555396	Mitotic Metaphase and Anaphase	3	250	0.016551906779661018	0.014425908672475618	0.05492331712131371	3	33	0.0023923444976076554	9606	Homo sapiens	NUF2;CDK1;KNTC1		R-HSA-9624800;R-HSA-2467809;R-HSA-2467811
R-HSA-453276	Regulation of mitotic cell cycle	2	92	0.0060911016949152545	0.01534498602386225	0.05492331712131371	11	40	0.0028998115122517037	9606	Homo sapiens	CDK1		R-HSA-188371;R-HSA-174227;R-HSA-174132;R-HSA-174122;R-HSA-174171;R-HSA-174251;R-HSA-174120;R-HSA-174104;R-HSA-174079;R-HSA-174255;R-HSA-174157
R-HSA-174143	APC/C-mediated degradation of cell cycle proteins	2	92	0.0060911016949152545	0.01534498602386225	0.05492331712131371	11	40	0.0028998115122517037	9606	Homo sapiens	CDK1		R-HSA-188371;R-HSA-174227;R-HSA-174132;R-HSA-174122;R-HSA-174171;R-HSA-174251;R-HSA-174120;R-HSA-174104;R-HSA-174079;R-HSA-174255;R-HSA-174157
R-HSA-141424	Amplification of signal from the kinetochores	2	94	0.006223516949152542	0.015978886363558042	0.05492331712131371	4	4	2.899811512251704E-4	9606	Homo sapiens	NUF2;KNTC1		R-HSA-141409;R-HSA-141431;R-HSA-141422;R-HSA-141439
R-HSA-141444	Amplification of signal from unattached kinetochores via a MAD2 inhibitory signal	2	94	0.006223516949152542	0.015978886363558042	0.05492331712131371	4	4	2.899811512251704E-4	9606	Homo sapiens	NUF2;KNTC1		R-HSA-141409;R-HSA-141431;R-HSA-141422;R-HSA-141439
R-HSA-176417	Phosphorylation of Emi1	1	8	5.296610169491525E-4	0.016289705506299712	0.05492331712131371	1	2	1.449905756125852E-4	9606	Homo sapiens	CDK1		R-HSA-174122
R-HSA-113507	E2F-enabled inhibition of pre-replication complex formation	1	9	5.958686440677966E-4	0.018307772373771236	0.05492331712131371	1	1	7.24952878062926E-5	9606	Homo sapiens	CDK1		R-HSA-113638
R-HSA-2980767	Activation of NIMA Kinases NEK9, NEK6, NEK7	1	9	5.958686440677966E-4	0.018307772373771236	0.05492331712131371	1	4	2.899811512251704E-4	9606	Homo sapiens	CDK1		R-HSA-2984220
R-HSA-381340	Transcriptional regulation of white adipocyte differentiation	2	109	0.007216631355932203	0.021081515163086206	0.06324454548925862	3	18	0.0013049151805132667	9606	Homo sapiens	EBF1		R-HSA-560491;R-HSA-381283;R-HSA-977271
R-HSA-69618	Mitotic Spindle Checkpoint	2	111	0.007349046610169492	0.02180705247000969	0.06542115741002907	4	7	5.074670146440482E-4	9606	Homo sapiens	NUF2;KNTC1		R-HSA-141409;R-HSA-141431;R-HSA-141422;R-HSA-141439
R-HSA-2465910	MASTL Facilitates Mitotic Progression	1	12	7.944915254237289E-4	0.024337963226699455	0.07301388968009836	1	4	2.899811512251704E-4	9606	Homo sapiens	CDK1		R-HSA-2430533
R-HSA-9648025	EML4 and NUDC in mitotic spindle formation	2	121	0.008011122881355932	0.02558801758710172	0.07676405276130516	1	5	3.6247643903146296E-4	9606	Homo sapiens	NUF2;KNTC1		R-HSA-9648114
R-HSA-110056	MAPK3 (ERK1) activation	1	13	8.606991525423729E-4	0.02634004918201216	0.07902014754603648	1	4	2.899811512251704E-4	9606	Homo sapiens	CDK1		R-HSA-112342
R-HSA-75035	Chk1/Chk2(Cds1) mediated inactivation of Cyclin B:Cdk1 complex	1	15	9.93114406779661E-4	0.03033230050736424	0.09099690152209272	1	5	3.6247643903146296E-4	9606	Homo sapiens	CDK1		R-HSA-170070
R-HSA-9661069	Defective binding of RB1 mutants to E2F1,(E2F2, E2F3)	1	17	0.0011255296610169492	0.034308708539199984	0.09228695922707653	1	1	7.24952878062926E-5	9606	Homo sapiens	CDK1		R-HSA-9659782
R-HSA-9659787	Aberrant regulation of mitotic G1/S transition in cancer due to RB1 defects	1	17	0.0011255296610169492	0.034308708539199984	0.09228695922707653	1	2	1.449905756125852E-4	9606	Homo sapiens	CDK1		R-HSA-9659782
R-HSA-162658	Golgi Cisternae Pericentriolar Stack Reorganization	1	17	0.0011255296610169492	0.034308708539199984	0.09228695922707653	1	6	4.3497172683775554E-4	9606	Homo sapiens	CDK1		R-HSA-2172183
R-HSA-1474228	Degradation of the extracellular matrix	2	148	0.009798728813559322	0.037000940765817614	0.09228695922707653	2	105	0.007612005219660722	9606	Homo sapiens	COL14A1;LAMB1		R-HSA-1564117;R-HSA-2533874
R-HSA-5663220	RHO GTPases Activate Formins	2	149	0.009864936440677966	0.03745549414177274	0.09228695922707653	3	27	0.0019573727707699	9606	Homo sapiens	NUF2;KNTC1		R-HSA-5666160;R-HSA-5666129;R-HSA-5666169
R-HSA-8980692	RHOA GTPase cycle	2	154	0.010195974576271187	0.03976067434722064	0.09228695922707653	1	6	4.3497172683775554E-4	9606	Homo sapiens	IQGAP3		R-HSA-9013009
R-HSA-2142816	Synthesis of (16-20)-hydroxyeicosatetraenoic acids (HETE)	1	20	0.0013241525423728813	0.040243747320508505	0.09228695922707653	3	3	2.1748586341887777E-4	9606	Homo sapiens	CYP1B1		R-HSA-2161795;R-HSA-2161940;R-HSA-2161814
R-HSA-176412	Phosphorylation of the APC/C	1	20	0.0013241525423728813	0.040243747320508505	0.09228695922707653	1	2	1.449905756125852E-4	9606	Homo sapiens	CDK1		R-HSA-174132
R-HSA-9013148	CDC42 GTPase cycle	2	159	0.010527012711864406	0.042118950923372145	0.09228695922707653	1	6	4.3497172683775554E-4	9606	Homo sapiens	IQGAP3		R-HSA-9013157
R-HSA-6804114	TP53 Regulates Transcription of Genes Involved in G2 Cell Cycle Arrest	1	21	0.0013903601694915254	0.04221423764317889	0.09228695922707653	1	11	7.974481658692185E-4	9606	Homo sapiens	CDK1		R-HSA-6803875
R-HSA-2142670	Synthesis of epoxy (EET) and dihydroxyeicosatrienoic acids (DHET)	1	23	0.0015227754237288136	0.04614347961353826	0.09228695922707653	2	3	2.1748586341887777E-4	9606	Homo sapiens	CYP1B1		R-HSA-2161890;R-HSA-2161899
R-HSA-4419969	Depolymerisation of the Nuclear Lamina	1	23	0.0015227754237288136	0.04614347961353826	0.09228695922707653	2	6	4.3497172683775554E-4	9606	Homo sapiens	CDK1		R-HSA-5195402;R-HSA-5244669
R-HSA-174048	APC/C:Cdc20 mediated degradation of Cyclin B	1	24	0.0015889830508474577	0.04810224628954385	0.0962044925790877	3	3	2.1748586341887777E-4	9606	Homo sapiens	CDK1		R-HSA-174227;R-HSA-174120;R-HSA-174157
R-HSA-113510	E2F mediated regulation of DNA replication	1	24	0.0015889830508474577	0.04810224628954385	0.0962044925790877	1	4	2.899811512251704E-4	9606	Homo sapiens	CDK1		R-HSA-113638
R-HSA-373753	Nephrin family interactions	1	25	0.0016551906779661016	0.050057120088420004	0.10011424017684001	1	13	9.424387414818037E-4	9606	Homo sapiens	IQGAP3		R-HSA-451377
R-HSA-5633007	Regulation of TP53 Activity	2	178	0.011784957627118644	0.0515428709546456	0.1030857419092912	2	98	0.007104538205016674	9606	Homo sapiens	CDK1		R-HSA-6805109;R-HSA-6793661
R-HSA-2995383	Initiation of Nuclear Envelope (NE) Reformation	1	27	0.0017876059322033898	0.053955218958316675	0.10508824600439581	1	7	5.074670146440482E-4	9606	Homo sapiens	CDK1		R-HSA-9624800
R-HSA-194315	Signaling by Rho GTPases	4	709	0.04694120762711865	0.05566253697016865	0.10508824600439581	18	203	0.014716543424677396	9606	Homo sapiens	NUF2;KNTC1;IQGAP3		R-HSA-5626549;R-HSA-9018794;R-HSA-5672304;R-HSA-5666160;R-HSA-9018766;R-HSA-5666129;R-HSA-9013024;R-HSA-9017507;R-HSA-9013157;R-HSA-5666169;R-HSA-9013145;R-HSA-5626469;R-HSA-9018746;R-HSA-9013009;R-HSA-5626507;R-HSA-9013110;R-HSA-9014294;R-HSA-5672329
R-HSA-112409	RAF-independent MAPK1/3 activation	1	28	0.001853813559322034	0.05589845894645107	0.10508824600439581	1	12	8.699434536755111E-4	9606	Homo sapiens	CDK1		R-HSA-112342
R-HSA-9013149	RAC1 GTPase cycle	2	191	0.012645656779661016	0.05838816164056704	0.10508824600439581	1	6	4.3497172683775554E-4	9606	Homo sapiens	IQGAP3		R-HSA-9013145
R-HSA-9716542	Signaling by Rho GTPases, Miro GTPases and RHOBTB3	4	725	0.04800052966101695	0.05949879221932941	0.10508824600439581	18	212	0.01536900101493403	9606	Homo sapiens	NUF2;KNTC1;IQGAP3		R-HSA-5626549;R-HSA-9018794;R-HSA-5672304;R-HSA-5666160;R-HSA-9018766;R-HSA-5666129;R-HSA-9013024;R-HSA-9017507;R-HSA-9013157;R-HSA-5666169;R-HSA-9013145;R-HSA-5626469;R-HSA-9018746;R-HSA-9013009;R-HSA-5626507;R-HSA-9013110;R-HSA-9014294;R-HSA-5672329
R-HSA-2467813	Separation of Sister Chromatids	2	195	0.012910487288135594	0.060555568889259725	0.10508824600439581	2	8	5.799623024503408E-4	9606	Homo sapiens	NUF2;KNTC1		R-HSA-2467809;R-HSA-2467811
R-HSA-3000157	Laminin interactions	1	31	0.0020524364406779663	0.061705030335922006	0.10508824600439581	12	15	0.001087429317094389	9606	Homo sapiens	LAMB1		R-HSA-216051;R-HSA-2426676;R-HSA-2328145;R-HSA-216048;R-HSA-4084507;R-HSA-2426530;R-HSA-4084505;R-HSA-3907292;R-HSA-2426450;R-HSA-2396083;R-HSA-2327803;R-HSA-216058
R-HSA-8874081	MET activates PTK2 signaling	1	32	0.00211864406779661	0.06363286264154633	0.10508824600439581	1	5	3.6247643903146296E-4	9606	Homo sapiens	LAMB1		R-HSA-8874079
R-HSA-171319	Telomere Extension By Telomerase	1	34	0.0022510593220338984	0.06747703433361207	0.10508824600439581	2	10	7.249528780629259E-4	9606	Homo sapiens	CDK1		R-HSA-163096;R-HSA-9686521
R-HSA-69275	G2/M Transition	2	212	0.014036016949152543	0.07007012421555425	0.10508824600439581	33	78	0.005654632448890822	9606	Homo sapiens	CDK1		R-HSA-380294;R-HSA-170055;R-HSA-170116;R-HSA-380303;R-HSA-170057;R-HSA-170126;R-HSA-170131;R-HSA-380311;R-HSA-3000319;R-HSA-170070;R-HSA-8852306;R-HSA-8853405;R-HSA-2574845;R-HSA-170072;R-HSA-3000310;R-HSA-170076;R-HSA-2574840;R-HSA-380455;R-HSA-170087;R-HSA-4088024;R-HSA-170084;R-HSA-170088;R-HSA-170153;R-HSA-8853419;R-HSA-170158;R-HSA-170156;R-HSA-170161;R-HSA-4086410;R-HSA-380272;R-HSA-69754;R…
R-HSA-453274	Mitotic G2-G2/M phases	2	214	0.014168432203389831	0.07122048018045846	0.10508824600439581	35	80	0.005799623024503407	9606	Homo sapiens	CDK1		R-HSA-380294;R-HSA-170055;R-HSA-170116;R-HSA-380303;R-HSA-170057;R-HSA-170126;R-HSA-170131;R-HSA-380311;R-HSA-3000319;R-HSA-170070;R-HSA-8852306;R-HSA-8853405;R-HSA-2574845;R-HSA-170072;R-HSA-3000310;R-HSA-170076;R-HSA-2574840;R-HSA-380455;R-HSA-187937;R-HSA-170087;R-HSA-4088024;R-HSA-170084;R-HSA-170088;R-HSA-170153;R-HSA-8853419;R-HSA-170158;R-HSA-170156;R-HSA-170161;R-HSA-4086410;R-HSA-187959;…
R-HSA-9687139	Aberrant regulation of mitotic cell cycle due to RB1 defects	1	36	0.0023834745762711866	0.07130593119203954	0.10508824600439581	1	3	2.1748586341887777E-4	9606	Homo sapiens	CDK1		R-HSA-9659782
R-HSA-1474151	Tetrahydrobiopterin (BH4) synthesis, recycling, salvage and regulation	1	37	0.0024496822033898305	0.07321466990441128	0.10508824600439581	1	16	0.0011599246049006815	9606	Homo sapiens	DHFR		R-HSA-1497794
R-HSA-9675126	Diseases of mitotic cell cycle	1	38	0.0025158898305084744	0.07511961189606386	0.10508824600439581	1	5	3.6247643903146296E-4	9606	Homo sapiens	CDK1		R-HSA-9659782
R-HSA-9013424	RHOV GTPase cycle	1	39	0.0025820974576271187	0.07702076446790018	0.10508824600439581	1	2	1.449905756125852E-4	9606	Homo sapiens	IQGAP3		R-HSA-9018794
R-HSA-9619665	EGR2 and SOX10-mediated initiation of Schwann cell myelination	1	39	0.0025820974576271187	0.07702076446790018	0.10508824600439581	2	26	0.0018848774829636073	9606	Homo sapiens	LAMB1		R-HSA-9619666;R-HSA-9619668
R-HSA-3301854	Nuclear Pore Complex (NPC) Disassembly	1	42	0.002780720338983051	0.08270155847028171	0.10508824600439581	1	2	1.449905756125852E-4	9606	Homo sapiens	CDK1		R-HSA-2990882
R-HSA-6802948	Signaling by high-kinase activity BRAF mutants	1	44	0.002913135593220339	0.08646994061369162	0.10508824600439581	4	6	4.3497172683775554E-4	9606	Homo sapiens	IQGAP3		R-HSA-6802912;R-HSA-6802911;R-HSA-6802910;R-HSA-6803227
R-HSA-9013420	RHOU GTPase cycle	1	44	0.002913135593220339	0.08646994061369162	0.10508824600439581	1	4	2.899811512251704E-4	9606	Homo sapiens	IQGAP3		R-HSA-9018766
R-HSA-5689896	Ovarian tumor domain proteases	1	44	0.002913135593220339	0.08646994061369162	0.10508824600439581	1	14	0.0010149340292880964	9606	Homo sapiens	CDK1		R-HSA-8940100
R-HSA-8948216	Collagen chain trimerization	1	44	0.002913135593220339	0.08646994061369162	0.10508824600439581	1	28	0.0020298680585761927	9606	Homo sapiens	COL14A1		R-HSA-8944236
R-HSA-8875878	MET promotes cell motility	1	45	0.002979343220338983	0.08834850922805437	0.10508824600439581	1	12	8.699434536755111E-4	9606	Homo sapiens	LAMB1		R-HSA-8874079
R-HSA-196757	Metabolism of folate and pterines	1	47	0.003111758474576271	0.0920944375746997	0.10508824600439581	1	30	0.002174858634188778	9606	Homo sapiens	DHFR		R-HSA-9709098
R-HSA-5674135	MAP2K and MAPK activation	1	49	0.0032441737288135594	0.09582546863263963	0.10508824600439581	8	12	8.699434536755111E-4	9606	Homo sapiens	IQGAP3		R-HSA-9657603;R-HSA-5672980;R-HSA-5672978;R-HSA-9657606;R-HSA-5672972;R-HSA-9657608;R-HSA-5672973;R-HSA-9657599
R-HSA-9656223	Signaling by RAF1 mutants	1	49	0.0032441737288135594	0.09582546863263963	0.10508824600439581	4	7	5.074670146440482E-4	9606	Homo sapiens	IQGAP3		R-HSA-9656211;R-HSA-9656209;R-HSA-9656215;R-HSA-9656214
R-HSA-71403	Citric acid cycle (TCA cycle)	1	50	0.0033103813559322032	0.097685415586095	0.10508824600439581	2	17	0.001232419892706974	9606	Homo sapiens	ACO1		R-HSA-450975;R-HSA-70971
R-HSA-381676	Glucagon-like Peptide-1 (GLP1) regulates insulin secretion	1	50	0.0033103813559322032	0.097685415586095	0.10508824600439581	1	11	7.974481658692185E-4	9606	Homo sapiens	IQGAP3		R-HSA-381707
R-HSA-69236	G1 Phase	1	52	0.0034427966101694915	0.10139420804110255	0.10508824600439581	1	17	0.001232419892706974	9606	Homo sapiens	CDK1		R-HSA-9018017
R-HSA-69231	Cyclin D associated events in G1	1	52	0.0034427966101694915	0.10139420804110255	0.10508824600439581	1	17	0.001232419892706974	9606	Homo sapiens	CDK1		R-HSA-9018017
R-HSA-6802946	Signaling by moderate kinase activity BRAF mutants	1	54	0.0035752118644067797	0.10508824600439581	0.10508824600439581	4	7	5.074670146440482E-4	9606	Homo sapiens	IQGAP3		R-HSA-6802919;R-HSA-6802914;R-HSA-6803230;R-HSA-6802921
R-HSA-9649948	Signaling downstream of RAS mutants	1	54	0.0035752118644067797	0.10508824600439581	0.10508824600439581	4	7	5.074670146440482E-4	9606	Homo sapiens	IQGAP3		R-HSA-6803233;R-HSA-6802926;R-HSA-6802925;R-HSA-6802922
R-HSA-6802955	Paradoxical activation of RAF signaling by kinase inactive BRAF	1	54	0.0035752118644067797	0.10508824600439581	0.10508824600439581	4	7	5.074670146440482E-4	9606	Homo sapiens	IQGAP3		R-HSA-6802918;R-HSA-6803234;R-HSA-6802943;R-HSA-6802942
R-HSA-6802949	Signaling by RAS mutants	1	54	0.0035752118644067797	0.10508824600439581	0.10508824600439581	4	9	6.524575902566333E-4	9606	Homo sapiens	IQGAP3		R-HSA-6803233;R-HSA-6802926;R-HSA-6802925;R-HSA-6802922
R-HSA-9013409	RHOJ GTPase cycle	1	59	0.00390625	0.11425916190142826	0.11425916190142826	1	3	2.1748586341887777E-4	9606	Homo sapiens	IQGAP3		R-HSA-9017507
R-HSA-3000171	Non-integrin membrane-ECM interactions	1	61	0.004038665254237288	0.11790200465270051	0.11790200465270051	2	22	0.001594896331738437	9606	Homo sapiens	LAMB1		R-HSA-2328129;R-HSA-2426355
R-HSA-187577	SCF(Skp2)-mediated degradation of p27/p21	1	62	0.0041048728813559325	0.11971798474288109	0.11971798474288109	4	7	5.074670146440482E-4	9606	Homo sapiens	CDK1		R-HSA-187552;R-HSA-187520;R-HSA-187574;R-HSA-187575
R-HSA-2980766	Nuclear Envelope Breakdown	1	65	0.004303495762711864	0.12514424361873244	0.12514424361873244	4	13	9.424387414818037E-4	9606	Homo sapiens	CDK1		R-HSA-2984220;R-HSA-5195402;R-HSA-5244669;R-HSA-2990882
R-HSA-6791312	TP53 Regulates Transcription of Cell Cycle Genes	1	65	0.004303495762711864	0.12514424361873244	0.12514424361873244	1	42	0.003044802087864289	9606	Homo sapiens	CDK1		R-HSA-6803875
R-HSA-180786	Extension of Telomeres	1	67	0.004435911016949153	0.12874375123703707	0.12874375123703707	2	28	0.0020298680585761927	9606	Homo sapiens	CDK1		R-HSA-163096;R-HSA-9686521
R-HSA-2022090	Assembly of collagen fibrils and other multimeric structures	1	67	0.004435911016949153	0.12874375123703707	0.12874375123703707	1	26	0.0018848774829636073	9606	Homo sapiens	COL14A1		R-HSA-2213205
R-HSA-8978934	Metabolism of cofactors	1	68	0.004502118644067797	0.13053812634764517	0.13053812634764517	1	28	0.0020298680585761927	9606	Homo sapiens	DHFR		R-HSA-1497794
R-HSA-1268020	Mitochondrial protein import	1	69	0.004568326271186441	0.13232892486965953	0.13232892486965953	1	14	0.0010149340292880964	9606	Homo sapiens	ACO1		R-HSA-1268022
R-HSA-1442490	Collagen degradation	1	69	0.004568326271186441	0.13232892486965953	0.13232892486965953	1	34	0.002464839785413948	9606	Homo sapiens	COL14A1		R-HSA-1564117
R-HSA-380284	Loss of proteins required for interphase microtubule organization from the centrosome	1	71	0.004700741525423728	0.13589981970214016	0.13589981970214016	3	3	2.1748586341887777E-4	9606	Homo sapiens	CDK1		R-HSA-380294;R-HSA-380272;R-HSA-380303
R-HSA-380259	Loss of Nlp from mitotic centrosomes	1	71	0.004700741525423728	0.13589981970214016	0.13589981970214016	2	2	1.449905756125852E-4	9606	Homo sapiens	CDK1		R-HSA-380272;R-HSA-380303
R-HSA-211976	Endogenous sterols	1	72	0.004766949152542373	0.1376799297576844	0.1376799297576844	1	18	0.0013049151805132667	9606	Homo sapiens	CYP1B1		R-HSA-211951
R-HSA-174184	Cdc20:Phospho-APC/C mediated degradation of Cyclin A	1	73	0.004833156779661017	0.139456490714843	0.139456490714843	3	3	2.1748586341887777E-4	9606	Homo sapiens	CDK1		R-HSA-174171;R-HSA-174104;R-HSA-174255
R-HSA-6802952	Signaling by BRAF and RAF1 fusions	1	73	0.004833156779661017	0.139456490714843	0.139456490714843	4	5	3.6247643903146296E-4	9606	Homo sapiens	IQGAP3		R-HSA-6802935;R-HSA-6802934;R-HSA-6802933;R-HSA-6802932
R-HSA-8854518	AURKA Activation by TPX2	1	74	0.004899364406779661	0.14122950941422618	0.14122950941422618	2	2	1.449905756125852E-4	9606	Homo sapiens	CDK1		R-HSA-8853405;R-HSA-8853419
R-HSA-179419	APC:Cdc20 mediated degradation of cell cycle proteins prior to satisfation of the cell cycle checkpoint	1	74	0.004899364406779661	0.14122950941422618	0.14122950941422618	3	6	4.3497172683775554E-4	9606	Homo sapiens	CDK1		R-HSA-174171;R-HSA-174104;R-HSA-174255
R-HSA-69017	CDK-mediated phosphorylation and removal of Cdc6	1	75	0.004965572033898305	0.14299899268371596	0.14299899268371596	1	4	2.899811512251704E-4	9606	Homo sapiens	CDK1		R-HSA-69005
R-HSA-9013026	RHOB GTPase cycle	1	75	0.004965572033898305	0.14299899268371596	0.14299899268371596	1	6	4.3497172683775554E-4	9606	Homo sapiens	IQGAP3		R-HSA-9013024
R-HSA-176409	APC/C:Cdc20 mediated degradation of mitotic proteins	1	76	0.005031779661016949	0.14476494733847745	0.14476494733847745	6	13	9.424387414818037E-4	9606	Homo sapiens	CDK1		R-HSA-174227;R-HSA-174171;R-HSA-174120;R-HSA-174104;R-HSA-174255;R-HSA-174157
R-HSA-1650814	Collagen biosynthesis and modifying enzymes	1	76	0.005031779661016949	0.14476494733847745	0.14476494733847745	19	51	0.0036972596781209223	9606	Homo sapiens	COL14A1		R-HSA-8948232;R-HSA-1650808;R-HSA-8948234;R-HSA-2002460;R-HSA-8944236;R-HSA-2022073;R-HSA-8948224;R-HSA-8948226;R-HSA-2089971;R-HSA-8948228;R-HSA-1981104;R-HSA-8948230;R-HSA-8948231;R-HSA-8948219;R-HSA-8948222;R-HSA-1981128;R-HSA-1980233;R-HSA-1981157;R-HSA-1981120
R-HSA-1474244	Extracellular matrix organization	2	329	0.0217823093220339	0.14599284673462332	0.14599284673462332	37	319	0.023125996810207338	9606	Homo sapiens	COL14A1;LAMB1		R-HSA-8948232;R-HSA-1564117;R-HSA-8948234;R-HSA-2002460;R-HSA-2426530;R-HSA-8948224;R-HSA-8948226;R-HSA-8948228;R-HSA-8948230;R-HSA-8948231;R-HSA-2426676;R-HSA-2533874;R-HSA-1981128;R-HSA-2426355;R-HSA-1980233;R-HSA-2396083;R-HSA-2327803;R-HSA-1981120;R-HSA-1650808;R-HSA-2328129;R-HSA-8944236;R-HSA-4084507;R-HSA-2022073;R-HSA-4084505;R-HSA-3907292;R-HSA-2089971;R-HSA-1981104;R-HSA-216051;R-HSA-23…
R-HSA-5684996	MAPK1/MAPK3 signaling	2	329	0.0217823093220339	0.14599284673462332	0.14599284673462332	9	82	0.005944613600115992	9606	Homo sapiens	CDK1;IQGAP3		R-HSA-9657603;R-HSA-5672980;R-HSA-5672978;R-HSA-9657606;R-HSA-112342;R-HSA-5672972;R-HSA-9657608;R-HSA-5672973;R-HSA-9657599
R-HSA-176814	Activation of APC/C and APC/C:Cdc20 mediated degradation of mitotic proteins	1	77	0.0050979872881355935	0.14652738018099942	0.14652738018099942	7	15	0.001087429317094389	9606	Homo sapiens	CDK1		R-HSA-174227;R-HSA-174132;R-HSA-174171;R-HSA-174120;R-HSA-174104;R-HSA-174255;R-HSA-174157
R-HSA-3000178	ECM proteoglycans	1	79	0.005230402542372881	0.1500417075759778	0.1500417075759778	1	23	0.0016673916195447296	9606	Homo sapiens	LAMB1		R-HSA-2396124
R-HSA-69473	G2/M DNA damage checkpoint	1	80	0.005296610169491525	0.151793615670187	0.151793615670187	1	12	8.699434536755111E-4	9606	Homo sapiens	CDK1		R-HSA-170070
R-HSA-380270	Recruitment of mitotic centrosome proteins and complexes	1	81	0.005362817796610169	0.15354202903569858	0.15354202903569858	3	3	2.1748586341887777E-4	9606	Homo sapiens	CDK1		R-HSA-380311;R-HSA-380455;R-HSA-380283
R-HSA-380287	Centrosome maturation	1	83	0.005495233050847458	0.1570283985256894	0.1570283985256894	6	6	4.3497172683775554E-4	9606	Homo sapiens	CDK1		R-HSA-380311;R-HSA-380455;R-HSA-380294;R-HSA-380272;R-HSA-380303;R-HSA-380283
R-HSA-8852276	The role of GTSE1 in G2/M progression after G2 checkpoint	1	83	0.005495233050847458	0.1570283985256894	0.1570283985256894	1	10	7.249528780629259E-4	9606	Homo sapiens	CDK1		R-HSA-8852306
R-HSA-917937	Iron uptake and transport	1	83	0.005495233050847458	0.1570283985256894	0.1570283985256894	3	34	0.002464839785413948	9606	Homo sapiens	ACO1		R-HSA-5690886;R-HSA-5690911;R-HSA-5690873
R-HSA-5579029	Metabolic disorders of biological oxidation enzymes	1	87	0.005760063559322034	0.16395949645540386	0.16395949645540386	1	38	0.0027548209366391185	9606	Homo sapiens	CYP1B1		R-HSA-5605147
R-HSA-69202	Cyclin E associated events during G1/S transition	1	88	0.005826271186440678	0.16568363472207326	0.16568363472207326	7	20	0.0014499057561258518	9606	Homo sapiens	CDK1		R-HSA-188386;R-HSA-187552;R-HSA-187520;R-HSA-188390;R-HSA-187574;R-HSA-187575;R-HSA-188350
R-HSA-2995410	Nuclear Envelope (NE) Reassembly	1	88	0.005826271186440678	0.16568363472207326	0.16568363472207326	1	24	0.0017398869073510222	9606	Homo sapiens	CDK1		R-HSA-9624800
R-HSA-6806834	Signaling by MET	1	88	0.005826271186440678	0.16568363472207326	0.16568363472207326	1	51	0.0036972596781209223	9606	Homo sapiens	LAMB1		R-HSA-8874079
R-HSA-5693607	Processing of DNA double-strand break ends	1	89	0.005892478813559322	0.1674043318251317	0.1674043318251317	2	17	0.001232419892706974	9606	Homo sapiens	CDK1		R-HSA-5684096;R-HSA-5684081
R-HSA-69656	Cyclin A:Cdk2-associated events at S phase entry	1	90	0.005958686440677966	0.1691215944042085	0.1691215944042085	6	19	0.0013774104683195593	9606	Homo sapiens	CDK1		R-HSA-187552;R-HSA-187520;R-HSA-187574;R-HSA-187575;R-HSA-187948;R-HSA-187949
R-HSA-2559582	Senescence-Associated Secretory Phenotype (SASP)	1	91	0.006024894067796611	0.17083542908657112	0.17083542908657112	2	22	0.001594896331738437	9606	Homo sapiens	CDK1		R-HSA-3788705;R-HSA-3788708
R-HSA-2565942	Regulation of PLK1 Activity at G2/M Transition	1	92	0.0060911016949152545	0.17254584248713656	0.17254584248713656	5	12	8.699434536755111E-4	9606	Homo sapiens	CDK1		R-HSA-3000319;R-HSA-4086410;R-HSA-2574845;R-HSA-3000310;R-HSA-2574840
R-HSA-9013404	RAC2 GTPase cycle	1	92	0.0060911016949152545	0.17254584248713656	0.17254584248713656	1	10	7.249528780629259E-4	9606	Homo sapiens	IQGAP3		R-HSA-9014294
R-HSA-6802957	Oncogenic MAPK signaling	1	93	0.006157309322033898	0.17425284120849616	0.17425284120849616	24	46	0.003334783239089459	9606	Homo sapiens	IQGAP3		R-HSA-6802919;R-HSA-9656211;R-HSA-6802918;R-HSA-9656209;R-HSA-9656215;R-HSA-6802914;R-HSA-6803234;R-HSA-9656214;R-HSA-6803233;R-HSA-6802912;R-HSA-6802926;R-HSA-6802925;R-HSA-6802922;R-HSA-6802921;R-HSA-6802935;R-HSA-6802934;R-HSA-6802933;R-HSA-6802932;R-HSA-6802943;R-HSA-6802911;R-HSA-6802942;R-HSA-6802910;R-HSA-6803230;R-HSA-6803227
R-HSA-6804756	Regulation of TP53 Activity through Phosphorylation	1	95	0.006289724576271186	0.17765662096247048	0.17765662096247048	1	26	0.0018848774829636073	9606	Homo sapiens	CDK1		R-HSA-6805109
R-HSA-380320	Recruitment of NuMA to mitotic centrosomes	1	97	0.006422139830508475	0.18104682092354596	0.18104682092354596	2	2	1.449905756125852E-4	9606	Homo sapiens	CDK1		R-HSA-380316;R-HSA-380508
R-HSA-5683057	MAPK family signaling cascades	2	380	0.025158898305084745	0.1829767779764646	0.1829767779764646	10	122	0.008844425112367696	9606	Homo sapiens	CDK1;IQGAP3		R-HSA-9657603;R-HSA-5672980;R-HSA-5672978;R-HSA-9657606;R-HSA-5692755;R-HSA-112342;R-HSA-5672972;R-HSA-9657608;R-HSA-5672973;R-HSA-9657599
R-HSA-5620912	Anchoring of the basal body to the plasma membrane	1	99	0.006554555084745763	0.1844234934709894	0.1844234934709894	8	9	6.524575902566333E-4	9606	Homo sapiens	CDK1		R-HSA-5626228;R-HSA-5626227;R-HSA-5626220;R-HSA-5626223;R-HSA-5626681;R-HSA-5617816;R-HSA-5626699;R-HSA-5638009
R-HSA-71406	Pyruvate metabolism and Citric Acid (TCA) cycle	1	100	0.0066207627118644065	0.18610677327975045	0.18610677327975045	2	36	0.0026098303610265334	9606	Homo sapiens	ACO1		R-HSA-450975;R-HSA-70971
R-HSA-1474290	Collagen formation	1	104	0.006885593220338983	0.1928063343853199	0.1928063343853199	20	77	0.005582137161084529	9606	Homo sapiens	COL14A1		R-HSA-8948232;R-HSA-1650808;R-HSA-8948234;R-HSA-2002460;R-HSA-8944236;R-HSA-2022073;R-HSA-8948224;R-HSA-8948226;R-HSA-2089971;R-HSA-8948228;R-HSA-1981104;R-HSA-8948230;R-HSA-8948231;R-HSA-8948219;R-HSA-2213205;R-HSA-8948222;R-HSA-1981128;R-HSA-1980233;R-HSA-1981157;R-HSA-1981120
R-HSA-422356	Regulation of insulin secretion	1	106	0.007018008474576272	0.19613607066136796	0.19613607066136796	1	34	0.002464839785413948	9606	Homo sapiens	IQGAP3		R-HSA-381707
R-HSA-5687128	MAPK6/MAPK4 signaling	1	106	0.007018008474576272	0.19613607066136796	0.19613607066136796	1	40	0.0028998115122517037	9606	Homo sapiens	CDK1		R-HSA-5692755
R-HSA-8957275	Post-translational protein phosphorylation	1	109	0.007216631355932203	0.20110576466041563	0.20110576466041563	1	1	7.24952878062926E-5	9606	Homo sapiens	LAMB1		R-HSA-8952289
R-HSA-157579	Telomere Maintenance	1	109	0.007216631355932203	0.20110576466041563	0.20110576466041563	2	34	0.002464839785413948	9606	Homo sapiens	CDK1		R-HSA-163096;R-HSA-9686521
R-HSA-163125	Post-translational modification: synthesis of GPI-anchored proteins	1	116	0.007680084745762712	0.2125863638070905	0.2125863638070905	1	16	0.0011599246049006815	9606	Homo sapiens	CPM		R-HSA-8940388
R-HSA-5693567	HDR through Homologous Recombination (HRR) or Single Strand Annealing (SSA)	1	124	0.008209745762711865	0.22551157993615012	0.22551157993615012	2	44	0.003189792663476874	9606	Homo sapiens	CDK1		R-HSA-5684096;R-HSA-5684081
R-HSA-381426	Regulation of Insulin-like Growth Factor (IGF) transport and uptake by Insulin-like Growth Factor Binding Proteins (IGFBPs)	1	127	0.008408368644067797	0.23030540307307523	0.23030540307307523	1	14	0.0010149340292880964	9606	Homo sapiens	LAMB1		R-HSA-8952289
R-HSA-5693538	Homology Directed Repair	1	130	0.008606991525423728	0.23507050548388964	0.23507050548388964	2	52	0.0037697549659272147	9606	Homo sapiens	CDK1		R-HSA-5684096;R-HSA-5684081
R-HSA-373760	L1CAM interactions	1	130	0.008606991525423728	0.23507050548388964	0.23507050548388964	1	54	0.0039147455415398	9606	Homo sapiens	LAMB1		R-HSA-443778
R-HSA-1500931	Cell-Cell communication	1	134	0.008871822033898306	0.24137958609709242	0.24137958609709242	1	60	0.004349717268377556	9606	Homo sapiens	IQGAP3		R-HSA-451377
R-HSA-9012999	RHO GTPase cycle	2	460	0.03045550847457627	0.24334436752437483	0.24334436752437483	10	91	0.006597071190372626	9606	Homo sapiens	IQGAP3		R-HSA-9013145;R-HSA-9018746;R-HSA-9018794;R-HSA-9018766;R-HSA-9013009;R-HSA-9013024;R-HSA-9017507;R-HSA-9013157;R-HSA-9013110;R-HSA-9014294
R-HSA-73886	Chromosome Maintenance	1	136	0.009004237288135594	0.24451521267243126	0.24451521267243126	2	38	0.0027548209366391185	9606	Homo sapiens	CDK1		R-HSA-163096;R-HSA-9686521
R-HSA-163685	Integration of energy metabolism	1	145	0.00960010593220339	0.258470997092367	0.258470997092367	1	62	0.0044947078439901405	9606	Homo sapiens	IQGAP3		R-HSA-381707
R-HSA-8878166	Transcriptional regulation by RUNX2	1	147	0.009732521186440678	0.2615382285662661	0.2615382285662661	1	84	0.006089604175728578	9606	Homo sapiens	CDK1		R-HSA-9009282
R-HSA-3700989	Transcriptional Regulation by TP53	2	487	0.03224311440677966	0.2640348626216903	0.2640348626216903	3	259	0.018776279541829782	9606	Homo sapiens	CDK1		R-HSA-6805109;R-HSA-6803875;R-HSA-6793661
R-HSA-2142753	Arachidonic acid metabolism	1	168	0.011122881355932203	0.2930117961894215	0.2930117961894215	5	77	0.005582137161084529	9606	Homo sapiens	CYP1B1		R-HSA-2161890;R-HSA-2161795;R-HSA-2161940;R-HSA-2161814;R-HSA-2161899
R-HSA-5693532	DNA Double-Strand Break Repair	1	169	0.011189088983050847	0.2944776932174624	0.2944776932174624	2	113	0.008191967522111062	9606	Homo sapiens	CDK1		R-HSA-5684096;R-HSA-5684081
R-HSA-9609507	Protein localization	1	170	0.011255296610169491	0.29594064864713476	0.29594064864713476	1	53	0.0038422502537335075	9606	Homo sapiens	ACO1		R-HSA-1268022
R-HSA-211897	Cytochrome P450 - arranged by substrate type	1	186	0.012314618644067797	0.3189525020958647	0.3189525020958647	1	61	0.004422212556183848	9606	Homo sapiens	CYP1B1		R-HSA-211951
R-HSA-2559583	Cellular Senescence	1	200	0.013241525423728813	0.33848939196365413	0.33848939196365413	2	90	0.006524575902566333	9606	Homo sapiens	CDK1		R-HSA-3788705;R-HSA-3788708
R-HSA-5617833	Cilium Assembly	1	210	0.013903601694915254	0.3521110854930799	0.3521110854930799	8	50	0.0036247643903146295	9606	Homo sapiens	CDK1		R-HSA-5626228;R-HSA-5626227;R-HSA-5626220;R-HSA-5626223;R-HSA-5626681;R-HSA-5617816;R-HSA-5626699;R-HSA-5638009
R-HSA-1428517	The citric acid (TCA) cycle and respiratory electron transport	1	238	0.015757415254237288	0.38882342988549157	0.38882342988549157	2	67	0.004857184283021603	9606	Homo sapiens	ACO1		R-HSA-450975;R-HSA-70971
R-HSA-196849	Metabolism of water-soluble vitamins and cofactors	1	258	0.01708156779661017	0.41380534098229094	0.41380534098229094	1	142	0.010294330868493549	9606	Homo sapiens	DHFR		R-HSA-9709098
R-HSA-5688426	Deubiquitination	1	289	0.019134004237288137	0.45058559145826205	0.45058559145826205	1	77	0.005582137161084529	9606	Homo sapiens	CDK1		R-HSA-8940100
R-HSA-211945	Phase I - Functionalization of compounds	1	299	0.019796080508474576	0.46196630105475334	0.46196630105475334	1	98	0.007104538205016674	9606	Homo sapiens	CYP1B1		R-HSA-211951
R-HSA-983168	Antigen processing: Ubiquitination & Proteasome degradation	1	315	0.02085540254237288	0.4797024371252877	0.4797024371252877	4	9	6.524575902566333E-4	9606	Homo sapiens	ZNRF1		R-HSA-983147;R-HSA-983157;R-HSA-983156;R-HSA-983140
R-HSA-1266738	Developmental Biology	3	1263	0.08362023305084745	0.48611134918152743	0.48611134918152743	6	556	0.04030738002029868	9606	Homo sapiens	EBF1;LAMB1		R-HSA-9619666;R-HSA-560491;R-HSA-443778;R-HSA-381283;R-HSA-9619668;R-HSA-977271
R-HSA-5673001	RAF/MAP kinase cascade	1	322	0.02131885593220339	0.4872828427516396	0.4872828427516396	8	75	0.005437146585471945	9606	Homo sapiens	IQGAP3		R-HSA-9657603;R-HSA-5672980;R-HSA-5672978;R-HSA-9657606;R-HSA-5672972;R-HSA-9657608;R-HSA-5672973;R-HSA-9657599
R-HSA-1852241	Organelle biogenesis and maintenance	1	338	0.022378177966101694	0.5042102988342061	0.5042102988342061	8	86	0.0062345947513411624	9606	Homo sapiens	CDK1		R-HSA-5626228;R-HSA-5626227;R-HSA-5626220;R-HSA-5626223;R-HSA-5626681;R-HSA-5617816;R-HSA-5626699;R-HSA-5638009
R-HSA-73894	DNA Repair	1	381	0.02522510593220339	0.5470665564916423	0.5470665564916423	2	339	0.02457590256633319	9606	Homo sapiens	CDK1		R-HSA-5684096;R-HSA-5684081
R-HSA-196854	Metabolism of vitamins and cofactors	1	382	0.025291313559322032	0.5480192591359564	0.5480192591359564	2	204	0.01478903871248369	9606	Homo sapiens	DHFR		R-HSA-1497794;R-HSA-9709098
R-HSA-5668914	Diseases of metabolism	1	425	0.02813824152542373	0.5872003700563451	0.5872003700563451	1	195	0.014136581122227055	9606	Homo sapiens	CYP1B1		R-HSA-5605147
R-HSA-8978868	Fatty acid metabolism	1	431	0.028535487288135594	0.592399077550714	0.592399077550714	5	217	0.01573147745396549	9606	Homo sapiens	CYP1B1		R-HSA-2161890;R-HSA-2161795;R-HSA-2161940;R-HSA-2161814;R-HSA-2161899
R-HSA-162582	Signal Transduction	6	3013	0.1994835805084746	0.6041809452783022	0.6041809452783022	29	2465	0.17870088444251123	9606	Homo sapiens	NUF2;CDK1;LAMB1;KNTC1;IQGAP3		R-HSA-5672980;R-HSA-5672978;R-HSA-5692755;R-HSA-9018766;R-HSA-5666129;R-HSA-9013145;R-HSA-9657603;R-HSA-9657606;R-HSA-112342;R-HSA-9013009;R-HSA-8874079;R-HSA-5672972;R-HSA-9657608;R-HSA-5672973;R-HSA-5626507;R-HSA-9014294;R-HSA-5672329;R-HSA-5626549;R-HSA-9018794;R-HSA-5672304;R-HSA-5666160;R-HSA-9013024;R-HSA-9017507;R-HSA-9013157;R-HSA-9657599;R-HSA-5666169;R-HSA-5626469;R-HSA-9018746;R-HSA-90…
R-HSA-983169	Class I MHC mediated antigen processing & presentation	1	479	0.03171345338983051	0.6317685892336389	0.6317685892336389	4	48	0.0034797738147020443	9606	Homo sapiens	ZNRF1		R-HSA-983147;R-HSA-983157;R-HSA-983156;R-HSA-983140
R-HSA-6798695	Neutrophil degranulation	1	480	0.03177966101694915	0.6325483139241065	0.6325483139241065	1	10	7.249528780629259E-4	9606	Homo sapiens	IQGAP3		R-HSA-6798743
R-HSA-5663202	Diseases of signal transduction by growth factor receptors and second messengers	1	498	0.03297139830508475	0.6463131607875987	0.6463131607875987	24	478	0.034652747571407856	9606	Homo sapiens	IQGAP3		R-HSA-6802919;R-HSA-9656211;R-HSA-6802918;R-HSA-9656209;R-HSA-9656215;R-HSA-6802914;R-HSA-6803234;R-HSA-9656214;R-HSA-6803233;R-HSA-6802912;R-HSA-6802926;R-HSA-6802925;R-HSA-6802922;R-HSA-6802921;R-HSA-6802935;R-HSA-6802934;R-HSA-6802933;R-HSA-6802932;R-HSA-6802943;R-HSA-6802911;R-HSA-6802942;R-HSA-6802910;R-HSA-6803230;R-HSA-6803227
R-HSA-597592	Post-translational protein modification	3	1605	0.10626324152542373	0.6540506071114209	0.6540506071114209	3	538	0.039002464839785415	9606	Homo sapiens	CPM;CDK1;LAMB1		R-HSA-8952289;R-HSA-8940100;R-HSA-8940388
R-HSA-211859	Biological oxidations	1	549	0.03634798728813559	0.6826582462778792	0.6826582462778792	1	188	0.013629114107583008	9606	Homo sapiens	CYP1B1		R-HSA-211951
R-HSA-422475	Axon guidance	1	585	0.03873146186440678	0.7061088034640026	0.7061088034640026	1	298	0.021603595766275192	9606	Homo sapiens	LAMB1		R-HSA-443778
R-HSA-9006934	Signaling by Receptor Tyrosine Kinases	1	620	0.041048728813559324	0.7272952422602217	0.7272952422602217	1	746	0.054081484703494276	9606	Homo sapiens	LAMB1		R-HSA-8874079
R-HSA-9675108	Nervous system development	1	621	0.041114936440677964	0.7278783062142434	0.7278783062142434	3	324	0.0234884732492388	9606	Homo sapiens	LAMB1		R-HSA-9619666;R-HSA-443778;R-HSA-9619668
R-HSA-9752946	Expression and translocation of olfactory receptors	1	813	0.053826800847457626	0.8200756632778659	0.8200756632778659	2	4	2.899811512251704E-4	9606	Homo sapiens	EBF1		R-HSA-9752950;R-HSA-9752951
R-HSA-212436	Generic Transcription Pathway	2	1555	0.10295286016949153	0.8429524769468598	0.8429524769468598	4	830	0.06017108887922285	9606	Homo sapiens	CDK1		R-HSA-6805109;R-HSA-6803875;R-HSA-6793661;R-HSA-9009282
R-HSA-381753	Olfactory Signaling Pathway	1	887	0.05872616525423729	0.8468222872263073	0.8468222872263073	2	13	9.424387414818037E-4	9606	Homo sapiens	EBF1		R-HSA-9752950;R-HSA-9752951
R-HSA-392499	Metabolism of proteins	3	2212	0.1464512711864407	0.852331413734866	0.852331413734866	3	810	0.058721183123097	9606	Homo sapiens	CPM;CDK1;LAMB1		R-HSA-8952289;R-HSA-8940100;R-HSA-8940388
R-HSA-382551	Transport of small molecules	1	965	0.06389036016949153	0.8708399384558423	0.8708399384558423	3	443	0.03211541249818762	9606	Homo sapiens	ACO1		R-HSA-5690886;R-HSA-5690911;R-HSA-5690873
R-HSA-73857	RNA Polymerase II Transcription	2	1697	0.11235434322033898	0.877613632552627	0.877613632552627	4	891	0.0645933014354067	9606	Homo sapiens	CDK1		R-HSA-6805109;R-HSA-6803875;R-HSA-6793661;R-HSA-9009282
R-HSA-2262752	Cellular responses to stress	1	1001	0.0662738347457627	0.8806546788205899	0.8806546788205899	2	444	0.03218790778599391	9606	Homo sapiens	CDK1		R-HSA-3788705;R-HSA-3788708
R-HSA-1280218	Adaptive Immune System	1	1012	0.0670021186440678	0.8835068512418675	0.8835068512418675	4	264	0.019138755980861243	9606	Homo sapiens	ZNRF1		R-HSA-983147;R-HSA-983157;R-HSA-983156;R-HSA-983140
R-HSA-8953897	Cellular responses to stimuli	1	1019	0.0674655720338983	0.8852874047291728	0.8852874047291728	2	475	0.03443526170798898	9606	Homo sapiens	CDK1		R-HSA-3788705;R-HSA-3788708
R-HSA-74160	Gene expression (Transcription)	2	1860	0.12314618644067797	0.9089259576871956	0.9089259576871956	4	1006	0.07293025953313034	9606	Homo sapiens	CDK1		R-HSA-6805109;R-HSA-6803875;R-HSA-6793661;R-HSA-9009282
R-HSA-1643685	Disease	3	2651	0.1755164194915254	0.9277058169262278	0.9277058169262278	26	1708	0.12382195157314775	9606	Homo sapiens	CDK1;CYP1B1;IQGAP3		R-HSA-6802919;R-HSA-9656211;R-HSA-6802918;R-HSA-9656209;R-HSA-9656215;R-HSA-6802914;R-HSA-6803234;R-HSA-9656214;R-HSA-6803233;R-HSA-6802912;R-HSA-6802926;R-HSA-6802925;R-HSA-6802922;R-HSA-6802921;R-HSA-5605147;R-HSA-6802935;R-HSA-6802934;R-HSA-6802933;R-HSA-6802932;R-HSA-9659782;R-HSA-6802943;R-HSA-6802942;R-HSA-6802911;R-HSA-6802910;R-HSA-6803230;R-HSA-6803227
R-HSA-9709957	Sensory Perception	1	1262	0.08355402542372882	0.9331174371281549	0.9331174371281549	2	143	0.01036682615629984	9606	Homo sapiens	EBF1		R-HSA-9752950;R-HSA-9752951
R-HSA-168249	Innate Immune System	1	1338	0.08858580508474577	0.9436116435794992	0.9436116435794992	1	710	0.05147165434246774	9606	Homo sapiens	IQGAP3		R-HSA-6798743
R-HSA-556833	Metabolism of lipids	1	1446	0.09573622881355932	0.95582779548292	0.95582779548292	5	955	0.06923299985500943	9606	Homo sapiens	CYP1B1		R-HSA-2161890;R-HSA-2161795;R-HSA-2161940;R-HSA-2161814;R-HSA-2161899
R-HSA-1430728	Metabolism	4	3639	0.24092955508474576	0.9608401600250814	0.9608401600250814	11	2250	0.16311439756415833	9606	Homo sapiens	DHFR;CYP1B1;ACO1;IQGAP3		R-HSA-2161890;R-HSA-2161795;R-HSA-1497794;R-HSA-2161940;R-HSA-2161814;R-HSA-450975;R-HSA-70971;R-HSA-2161899;R-HSA-211951;R-HSA-381707;R-HSA-9709098
R-HSA-168256	Immune System	2	2691	0.1781647245762712	0.98238141639623	0.98238141639623	5	1625	0.11780484268522547	9606	Homo sapiens	ZNRF1;IQGAP3		R-HSA-6798743;R-HSA-983147;R-HSA-983157;R-HSA-983156;R-HSA-983140
